# Supplementary material for: Witnessing the structural evolution of an RNA enzyme
Source: eLife. 2021 Sep 9;10:e71557. doi: 10.7554/eLife.71557 (PMC8460264; doi:10.7554/eLife.71557)
Supplement: Figure 1—source data 2. [file elife-71557-fig1-data2.xlsx]

## Sheet: Figure 1C
Figure 1C: RNA ligation catalyzed by the class I ligase ribozyme that was synthesized by the 52-2 polymerase
	ligated product (µM)
time (h)	class I ligase	uncatalyzed
0	0.000782	0.000591
1	0.484566	0.001347
2	0.939693	0.001628
4	1.79087	0.002179
8	3.30191	0.003019
24	7.54964	0.006021
Linear fit
slope	0.3085	0.0002107
y-intercept	0.3396	0.001094
x-intercept	-1.101	-5.193
std error slope	0.017	1.567e-05
std error y-intercept	0.1784	0.0001645
R-squared	0.988	0.9784
S(y.x)	0.3431	0.0003163
