# Supplementary material for: Witnessing the structural evolution of an RNA enzyme
Source: eLife. 2021 Sep 9;10:e71557. doi: 10.7554/eLife.71557 (PMC8460264; doi:10.7554/eLife.71557)
Supplement: Figure 3—source data 1. [file elife-71557-fig3-data1.xlsx]

## Sheet: extension yields
Figure 3: Effect on polymerase activity of disruptive and compensatory mutations within the P8 stem
mutant	replicate 1	replicate 2	replicate 3	replicate 4	replicate 5	mean	std dev	% 52-2 activity	% 52-2 std dev	replicates
primer only	1.171e-05	0.000296681	0.000156229	0.0002	1.5318e-05	0.000135988	0.000122817	0.000691846	0.000628696	5
52-2	0.199213	0.21149	0.218538	0.1825	0.171047	0.196558	0.0197584	1	0.14216	5
G11C	7.43677e-05	0	0.000542311	9.16081e-05		0.000177072	0.000246716	0.000900864	0.00125845	4
C89G	0.00536066	0.00187794	0.00169624	0.00237445		0.00282732	0.00171304	0.0143842	0.00883435	4
G11C/G89C	0.0150318	0.00875577	0.00581969	0.0130099		0.0106543	0.00415087	0.0542044	0.0218094	4
C12G	2.41861e-05	0	0.000671812	4.01474e-05		0.000184036	0.000325602	0.000936298	0.0016592	4
G88C	0.00583232	0.0030178	0.00455907	0.00415896		0.00439204	0.0011612	0.0223448	0.00632028	4
C12G/G88C	0.138116	0.095558	0.122247	0.105124		0.115261	0.018816	0.586399	0.112421	4
A13U	0.002841	0.00116326	0.00212221	0.00188209		0.00200214	0.000691915	0.010186	0.00366605	4
U87A	0.000613518	0	0.00152006	0.000397754		0.000632832	0.000643759	0.00321957	0.00329112	4
A13U/U87A	0.135164	0.113339	0.122957	0.12923		0.125173	0.00933148	0.636824	0.0796979	4
C14G	5.28783e-05	0	0.00129968	0.000260215		0.000403194	0.000608118	0.00205128	0.0031007	4
G86C	0.00145323	0.000953256	0.00335083	0.0011267		0.001721	0.00110615	0.00875571	0.00569601	4
C14G/G86C	0.166772	0.132708	0.140457	0.127241		0.141794	0.0175123	0.721388	0.114876	4
C15G	0	2.57452e-05	0.00181946	3.99927e-05		0.000471299	0.000898926	0.00239777	0.00457969	4
G85C	0.00223078	0.00159471	0.00319408	0.00148785		0.00212685	0.000783427	0.0108205	0.00413149	4
C15G/G85C	0.0259576	0.0167034	0.0351871	0.0183441		0.0240481	0.00844994	0.122346	0.0447142	4
A16U	0.000569664	0.000220673	0.00011325	0.0011	0.000256178	0.000451953	0.000400112	0.00229934	0.00204868	5
U84A	0.10414	0.0659063	0.080237	0.0894	0.0755676	0.0830501	0.0145164	0.422523	0.0851951	5
A16U/U84A	3.1335e-05	0.000410352	0.000181032	0.0004	0.000111986	0.000226941	0.000171153	0.00115458	0.000878451	5
U80G	0.0451665	0.0278094	0.0370499	0.029086		0.0347779	0.00804241	0.176935	0.0446148	4
C81G	0.0328993	0.0202611	0.0207494	0.020365		0.0235687	0.00622394	0.119907	0.0338812	4
C81G/G88C	0.000402931	0.000339698	0.000335563			0.000359398	3.7758e-05	0.00182846	0.000265864	3
C12G/C81G/G88C	0.0427452	0.0237462	0.034032	0.0279696		0.0321233	0.00824413	0.163429	0.0450452	4
C12G/C81G	0.000660556	0.000752149	0.000752791			0.000721832	5.30671e-05	0.00367237	0.000457346	3
A82U	0.101008	0.0676934	0.0624733	0.0728319		0.0760017	0.0171989	0.386663	0.095745	4
A82U/U87A	0.000170741	0.000360241	0.00167695	0.000251952		0.00061497	0.000712227	0.0031287	0.00363712	4
A13U/A82U/U87A	0.0908923	0.0566213	0.0486979	0.0628247		0.0647591	0.0183564	0.329466	0.0990879	4
A13U/A82U	0.000281889	0.000576745	0.0004	0.000675614		0.000483562	0.000176278	0.00246015	0.000930297	4

## Sheet: Figure 3A
Figure 3A: Yield of full-length RNA relative to 52-2 polymerase (30-min reaction)
base pair	5´ mutant			3´ mutant			double mutant
	mean	std dev	n	mean	std dev	n	mean	std dev	n
G11-C89	0.09	0.13	4	1.44	0.88	4	5.42	2.18	4
C12-G88	0.09	0.17	4	2.23	0.63	4	58.64	11.24	4
A13-U87	1.02	0.37	4	0.32	0.33	4	63.68	7.97	4
C14-G86	0.21	0.31	4	0.88	0.57	4	72.14	11.49	4
C15-G85	0.24	0.46	4	1.08	0.41	4	12.23	4.47	4
A16-U84	0.23	0.2	5	42.25	8.52	5	0.12	0.09	5

## Sheet: Figure 3B
Figure 3B: Time course of primer extension
time (s)	52-2		C12G		G88C		C12G/G88C
	rep 1	rep 2	rep 1	rep 2	rep 1	rep 2	rep 1	rep 2
0	0	0	0	0	0	0	0	0
10	0.171038	0.172551	0.009689	0.007337	0.053333	0.036702	0.14283	0.154099
20	0.201542	0.191892	0.010682	-0.00167	0.060668	0.034814	0.168232	0.172326
30	0.215297	0.206448	0.016864	0.003323	0.064395	0.039757	0.174654	0.170202
40	0.211056	0.209601	0.019726	0.001393	0.075511	0.038731	0.172551	0.183077
50	0.218639	0.214029	0.019923	0.004148	0.076806	0.047662	0.176929	0.190104
60	0.227348	0.219682	0.013959	0.009469	0.077743	0.043119	0.192752	0.202242
80	0.240507	0.231034					0.207499	0.226929
100	0.252238	0.244678					0.20534	0.227344
120	0.253278	0.247158	0.030277	0.025467	0.103087	0.0689	0.214066	0.24035
180	0.276106	0.275102	0.036435	0.041582	0.107676	0.065584	0.26108	0.283334
240	0.303426	0.302661	0.033199	0.033635	0.108105	0.066131	0.283096	0.301069
300	0.322369	0.323065	0.048176	0.033358	0.122439	0.066801	0.30378	0.327566
600	0.416388	0.413305	0.06823	0.057931	0.143292	0.105213	0.393175	0.412147
1200	0.555774	0.554008	0.122339	0.10247	0.211924	0.161115	0.527096	0.532663
1800	0.64	0.635058	0.162084	0.148156	0.261891	0.217827	0.609803	0.615516
2400			0.205397	0.183922	0.30354	0.265303
3000			0.228156	0.205896	0.337996	0.30455
3600	0.788416	0.787074	0.257434	0.240618	0.367633	0.336005	0.748693	0.749351
7200	0.884207	0.882982	0.387205	0.365713	0.513603	0.491132	0.853265	0.852009
14400	0.939822	0.938656	0.531325	0.511783	0.659073	0.644234	0.910971	0.915706
21600	0.960232	0.957623	0.623848	0.606258	0.750716	0.733515	0.93791	0.938726
72000	0.983154	0.982105	0.801772	0.807188	0.910664	0.908796	0.970807	0.97035
180000	0.987833	0.987273	0.912174	0.910337	0.963528	0.962395	0.982786	0.982184
342000	0.98926	0.988967	0.949412	0.948058	0.975775	0.974244	0.986685	0.986065
Kinetic model: y = y(t=0) + [(y(max) – y(t=0) * (1 – exp(–k*x))]
y(t=0)	0.1844		0.02632		0.06729		0.1645
y(max)	0.9568		0.8833		0.9305		0.9405
k (sec–1)	0.0005143		6.531e-05		9.333e-05		0.0004982
std. error y(t=0)	0.01047		0.00672		0.007661		0.01069
std. error y(max)	0.0139		0.01442		0.01504		0.0143
std error k	4.218e-05		3.657e-06		5.533e-06		4.176e-05
R-squared	0.9805		0.9877		0.9863		0.9796
S(y.x)	0.04721		0.03479		0.03838		0.04839

## Sheet: Figure 3C
Figure 3C: Average number of nucleotides added during burst phase
time (s)	52-2		C12G		G88C		C12G/G88C
	rep 1	rep 2	rep 1	rep 2	rep 1	rep 2	rep 1	rep 2
0	0	0	0	0	0	0	0	0
10	0.564872	0.560497	0.017865	0.0256594	0.0942666	0.0395022	0.363136	0.501719
20	1.11199	1.04802	0.014504	0.0242232	0.186089	0.0574597	0.778123	0.831104
30	1.57362	1.49011	0.0123836	0.0363706	0.271553	0.145651	1.12177	1.18382
40	1.78079	1.70564	0.0213128	0.0269109	0.371287	0.216074	1.40294	1.36883
50	1.95107	1.89859	0.0747871	0.0269449	0.443754	0.342072	1.5785	1.50402
60	2.08227	2.02514	0.0295966	0.0359535	0.491747	0.359644	1.65327	1.69975
80	2.25554	2.26614					1.85566	1.83103
100	2.42954	2.40935					1.93173	1.94657
120	2.50652	2.46372	0.0557154	0.0788744	0.722151	0.595011	2.03941	2.08231
180	2.8092	2.74265	0.0936577	0.0897422	0.783124	0.646926	2.51018	2.5404
240	3.04512	3.05485	0.118806	0.133831	0.887974	0.721607	2.66193	2.68794
300	3.26521	3.22594	0.179167	0.168766	0.950189	0.802617	2.85764	2.88331
600	4.21248	4.11795	0.39467	0.355784	1.24317	1.07171	3.64552	3.64998
1200	5.50624	5.38255	0.71935	0.680202	1.78764	1.64913	4.82283	4.65867
1800	6.1883	6.09197	1.03127	0.984269	2.30578	2.08631	5.65833	5.54655
2400			1.31588	1.26228	2.71638	2.53757
3000			1.50607	1.39274	3.07979	2.8798
3600	8.14018	7.91209	1.69306	1.57929	3.34596	3.21396	7.01676	6.91255
7200	9.69976	9.61069	2.753	2.60873	4.81727	4.67279	8.31011	8.31202
14400	11.101	10.9093	3.93436	3.81632	6.51789	6.30862	9.48571	9.52004
21600	11.6814	11.4783	4.78811	4.69222	7.59137	7.22613	10.2047	10.1558
	(values in gray not included in the fit)
Linear fit
slope	0.05113		0.0005467		0.007504		0.03831
y-intercept	0.0267		0.009989		-0.009463		0.02287
std error slope	0.001398		6.051e-06		0.0008326		0.001664
std error y-intercept	0.02615		0.005183		0.03002		0.03113
R-squared	0.9955		0.9966		0.8713		0.9888
S(y.x)	0.0442		0.02373		0.0623		0.05262

## Sheet: Figure 3 supp 1
Figure 3, supplement 1: Effect on polymerase activity of mutations within the P7 and P8 stems
Fig 3 supp 1B	U80G			G11C			C89G			G11C C89G
	mean	SD	N	mean	SD	N	mean	SD	N	mean	SD	N
	17.69	4.46	4	0.09	0.13	4	1.44	0.88	4	5.42	2.18	4
Fig 3 supp 1C	C81G			C12G			C12G C81G			C81G G88C			G88C			C12G C81G G88C			C12G G88C
	mean	SD	N	mean	SD	N	mean	SD	N	mean	SD	N	mean	SD	N	mean	SD	N	mean	SD	N
	11.99	3.39	4	0.09	0.17	4	0.37	0.05	3	0.182846	0.0265864	3	2.23	0.63	4	16.34	4.5	4	58.64	11.24	4
Fig 3 supp 1D	A82U			A13U			A13U A82U			A82U U87A			U87A			A13U A82U U87A			A13U U87A
	mean	SD	N	mean	SD	N	mean	SD	N	mean	SD	N	mean	SD	N	mean	SD	N	mean	SD	N
	38.67	9.57	4	1.02	0.37	4	0.25	0.09	4	0.31	0.36	4	0.32	0.33	4	32.95	9.91	4	63.68	7.97	4
