# Supplementary material for: Witnessing the structural evolution of an RNA enzyme
Source: eLife. 2021 Sep 9;10:e71557. doi: 10.7554/eLife.71557 (PMC8460264; doi:10.7554/eLife.71557)
Supplement: Figure 4—source data 2. [file elife-71557-fig4-data2.xlsx]

## Sheet: summary
Figure 4B: In-line probing of polymerase structure mapped ontp the P7 and P8 stems
wt					24-3					38-6					52-2
	nt	counts	%			nt	counts	%			nt	counts	%			nt	counts	%
G	96	134120	0.147383		G	96	622270	0.390852		G	96	566128	0.382184		G	96	248390	0.400435
C	95	76436	0.0839948		C	95	293633	0.184433		C	95	455726	0.307654		C	95	195295	0.314839
A	94	78856	0.0866541		C	94	167691	0.105328		C	94	225931	0.152523		C	94	135984	0.219223
A	93	164062	0.180286		A	93	128783	0.0808895		A	93	121503	0.0820248		A	93	108486	0.174893
C	92	355590	0.390754		C	92	131377	0.0825188		C	92	139696	0.0943066		C	92	130768	0.210814
C	91	209709	0.230447		C	91	163531	0.102715		C	91	210114	0.141845		C	91	212503	0.34258
–	90	–	–		–	90	–	–		A	90	469245	0.31678		A	90	406061	0.654619
–	89	–	–		–	89	–	–		C	89	349707	0.236082		C	89	244255	0.393769
G	88	98221	0.107934		G	88	232007	0.145725		G	88	226520	0.15292		G	88	111431	0.17964
C	87	81967	0.0900727		U	87	355486	0.223283		U	87	283005	0.191052		U	87	87616	0.141248
G	86	97560	0.107208		G	86	382518	0.240262		G	86	346919	0.2342		G	86	76395	0.123158
A	85	210469	0.231282		C	85	637249	0.40026		U	85	652830	0.440715		G	85	86700	0.139771
U	84	734326	0.806944		U	84	1030174	0.647059		U	84	1070053	0.722376		U	84	293594	0.473309
A	83	910009	1	**	A	83	1003251	0.630149		A	83	1259057	0.84997		A	83	377607	0.608748
G	82	337933	0.371351		G	82	852254	0.535307		A	82	1119532	0.755779		A	82	378193	0.609693
C	81	96743	0.10631		C	81	631561	0.396688		C	81	1481296	1	**	C	81	620301	1	**
G	80	43850	0.0481863		A	80	613782	0.385521		U	80	1168185	0.788624		U	80	495256	0.798412
C	79	37542	0.0412545		A	79	566843	0.356038		A	79	614424	0.414788		A	79	281800	0.454296
G	78	32571	0.035792		G	78	266463	0.167367		G	78	358678	0.242138		G	78	168091	0.270983
G	77	60199	0.0661521		G	77	145208	0.0912061		G	77	149767	0.101105		G	77	110246	0.17773
U	76	52555	0.0577522		U	76	137755	0.0865248		U	76	140489	0.0948419		U	76	100803	0.162507
G	75	68145	0.0748839		G	75	105633	0.0663488		G	75	120501	0.0813484		G	75	76121	0.122716
G	74	115789	0.127239		G	74	110988	0.0697123		G	74	142805	0.0964054		G	74	76380	0.123134
C	73	94376	0.103709		C	73	249600	0.156775		C	73	485036	0.32744		C	73	278967	0.449728
C	20	1465354	1.61026		C	20	2575016	1.61738		C	20	1575692	1.06373		C	20	945376	1.52406
A	19	726791	0.798664		A	19	463929	0.291397		A	19	708302	0.478164		A	19	355709	0.573446
G	18	466619	0.512763		G	18	980993	0.616168		G	18	979107	0.66098		G	18	411725	0.66375
A	17b	556219	0.611224		–	–	–	–		–	–	–	–		–	–	–	–
A	17a	431967	0.474684		A	17a	1500205	0.942289		–	–	–	–		–	–	–	–
A	17	459697	0.505157		A	17	894261	0.561691		A	17	2178905	1.47095		A	17	915555	1.47599
A	16	455068	0.50007		A	16	1592086	1	**	A	16	940091	0.634641		A	16	200601	0.323393
A	15	453491	0.498337		G	15	554164	0.348074		A	15	1004231	0.677941		C	15	220170	0.354941
C	14	465726	0.511782		C	14	370096	0.23246		C	14	685833	0.462995		C	14	56868	0.0916781
A	13	452475	0.49722		A	13	124876	0.0784355		A	13	100129	0.0675955		A	13	26846	0.043279
C	12	399338	0.438829		C	12	579238	0.363823		C	12	198758	0.134178		C	12	116076	0.187129
G	11	553163	0.607865		G	11	384857	0.241731		G	11	60351	0.040742		G	11	63014	0.101586
C	10	251694	0.276584		C	10	468915	0.294529		C	10	896152	0.604978		C	10	353431	0.569773
		910009					1592086					1481296					620301
(** nucleotide position with highest level of cleavage within region of interest)

## Sheet: wild type
bin	nt	volume	width	height	vol–bkgrnd
19	N86–90	5352	120	30
2	N13–14	11763	138	52
17	N10–12,15–20	18509	138	84
18	max 84–90	81352758	120	30
1	max 13–14	106616164	138	52
16	max 11–16	129665855	138	84
40	98	149837	120	30	144485
39	97	95934	120	30	90582
38	96	139472	120	30	134120
37	95	81788	120	30	76436
36	94	84208	120	30	78856
35	93	169414	120	30	164062
34	92	360942	120	30	355590
22	91	215061	120	30	209709
21	88	103573	120	30	98221
20	87	87319	120	30	81967
23	86	102912	120	30	97560
24	85	215821	120	30	210469
25	84	739678	120	30	734326
26	83	915361	120	30	910009
27	82	343285	120	30	337933
28	81	102095	120	30	96743
29	80	49202	120	30	43850
30	79	42894	120	30	37542
31	78	37923	120	30	32571
32	77	65551	120	30	60199
33	76	57907	120	30	52555
41	75	73497	120	30	68145
42	74	121141	120	30	115789
43	73	99728	120	30	94376
13	20	1483863	138	84	1465354
12	19	745300	138	84	726791
11	18	485128	138	84	466619
10	17b	574728	138	84	556219
9	17a	450476	138	84	431967
8	17	478206	138	84	459697
7	16	473577	138	84	455068
6	15	472000	138	84	453491
4	14	477489	138	52	465726
3	13	464238	138	52	452475
5	12	417847	138	84	399338
14	11	571672	138	84	553163
15	10	270203	138	84	251694

## Sheet: 24-3
bin	nt	volume	width	height	vol–bkgrnd
1	N80–97	2562	134	16
3	N73–79	3419	134	22
25	N10–20	30184	138	90
23	max 75–94	75896175	134	22
26	max 10–21	139619787	138	90
39	97	675457	134	16	672895
38	96	624832	134	16	622270
4	95	296195	134	16	293633
11	94	170253	134	16	167691
12	93	131345	134	16	128783
13	92	133939	134	16	131377
14	91	166093	134	16	163531
15	88	234569	134	16	232007
16	87	358048	134	16	355486
17	86	385080	134	16	382518
18	85	639811	134	16	637249
19	84	1032736	134	16	1030174
20	83	1005813	134	16	1003251
21	82	854816	134	16	852254
22	81	634123	134	16	631561
37	80	616344	134	16	613782
10	79	570262	134	24	566843
9	78	269882	134	24	266463
8	77	148627	134	24	145208
7	76	141174	134	24	137755
6	75	109052	134	24	105633
5	74	114407	134	24	110988
40	73	253019	134	24	249600
24	20	2605200	138	90	2575016
36	19	494113	138	90	463929
35	18	1011177	138	90	980993
34	17a	1530389	138	90	1500205
33	17	924445	138	90	894261
32	16	1622270	138	90	1592086
31	15	584348	138	90	554164
30	14	400280	138	90	370096
29	13	155060	138	90	124876
2	12	609422	138	90	579238
28	11	415041	138	90	384857
27	10	499099	138	90	468915

## Sheet: 38-6
bin	nt	volume	width	height	vol–bkgrnd
42	N93–96	1982	132	14
13	N79–92	2802	132	20
14	N73–78	3827	132	26
19	N10–20	9993	114	98
15	max 92–94	67031375	132	20
16	max 85–91	81773502	132	26
18	max 10–20	181871066	114	98
40	96	568110	132	14	566128
39	95	457708	132	14	455726
6	94	227913	132	14	225931
7	93	123485	132	14	121503
38	92	142498	132	20	139696
37	91	212916	132	20	210114
36	90	472047	132	20	469245
33	89	352509	132	20	349707
8	88	229322	132	20	226520
9	87	285807	132	20	283005
10	86	349721	132	20	346919
11	85	655632	132	20	652830
12	84	1072855	132	20	1070053
30	83	1261859	132	20	1259057
31	82	1122334	132	20	1119532
32	81	1484098	132	20	1481296
35	80	1170987	132	20	1168185
34	79	617226	132	20	614424
1	78	362505	132	26	358678
2	77	153594	132	26	149767
3	76	144316	132	26	140489
4	75	124328	132	26	120501
5	74	146632	132	26	142805
41	73	488863	132	26	485036
17	20	1585685	114	98	1575692
29	19	718295	114	98	708302
28	18	989100	114	98	979107
27	17	2188898	114	98	2178905
26	16	950084	114	98	940091
25	15	1014224	114	98	1004231
24	14	695826	114	98	685833
23	13	110122	114	98	100129
22	12	208751	114	98	198758
21	11	70344	114	98	60351
20	10	906145	114	98	896152

## Sheet: 52-2
bin	nt	volume	width	height	vol–bkgrnd
2	N85–96	1762	130	18
39	N73–84	2213	130	24
18	N18–20	11275	138	126
34	N11–16	9289	138	98
13	max 85–95	41621469	130	18
14	max 74–85	51364891	130	24
12	max 11–16	99265001	138	98
10	extra band 85–95	771591	130	18
4	extra band 74–95	1122138	130	24
43	96	250152	130	18	248390
3	95	197057	130	18	195295
6	94	137746	130	18	135984
8	93	110248	130	18	108486
7	92	132530	130	18	130768
9	91	214265	130	18	212503
27	90	407823	130	18	406061
28	89	246017	130	18	244255
25	88	113193	130	18	111431
26	87	89378	130	18	87616
30	86	78157	130	18	76395
31	85	88462	130	18	86700
32	84	295807	130	24	293594
1	83	379820	130	24	377607
21	82	380406	130	24	378193
22	81	622514	130	24	620301
23	80	497469	130	24	495256
24	79	284013	130	24	281800
40	78	170304	130	24	168091
16	77	112459	130	24	110246
11	76	103016	130	24	100803
41	75	78334	130	24	76121
35	74	78593	130	24	76380
44	73	281180	130	24	278967
17	20	956651	138	126	945376
19	19	366984	138	126	355709
20	18	423000	138	126	411725
5	17	924844	138	98	915555
29	16	209890	138	98	200601
36	15	229459	138	98	220170
37	14	66157	138	98	56868
38	13	36135	138	98	26846
33	12	125365	138	98	116076
42	11	72303	138	98	63014
15	10	362720	138	98	353431
