# Supplementary material for: Witnessing the structural evolution of an RNA enzyme
Source: eLife. 2021 Sep 9;10:e71557. doi: 10.7554/eLife.71557 (PMC8460264; doi:10.7554/eLife.71557)
Supplement: Figure 5—figure supplement 1—source data 1. [file elife-71557-fig5-figsupp1-data1.xlsx]

## Sheet: summary
5´ strand associated with named variants by round																3´ strand associated with named variants by round
wild type			indeterminate			24-3			38-6			52-2				wild type			24-3			38-6			52-2						5´ strand (%)						3´ strand (%)
round	nucleotides 9–17	freq. (%)	round	nucleotides 9–17	freq. (%)	round	nucleotides 9–17	freq. (%)	round	nucleotides 9–17	freq. (%)	round	nucleotides 9–17	freq. (%)		round	nucleotides 83–95	freq. (%)	round	nucleotides 83–95	freq. (%)	round	nucleotides 83–95	freq. (%)	round	nucleotides 83–95	freq. (%)		round		wild type	indeter	24-3	38-6	52-2		wild type	24-3	38-6	52-2
6	CCGCACAAA	1.1585	16	CCGCACAAA	14.8596	8	CCGCACGAA	1.09963	31	CCGCACAA	11.9912	46	CCGCACCAA	7.35001		6	AUAGCG--CCAAC	91.2004	11	AUCGUG--CCACC	6.28313	31	AUUGUGCACCACC	11.9912	46	AUGGUGCACCACC	7.35001		0		100						100
6	CCGCACAAA	91.2004	18	CCGCACAA	2.1418	11	CCGCACGA	1.1501	34	CCGCACAAA	44.6797	49	CCGCACCAA	75.5994		8	AUAGCG--CCAAC	64.0128	11	AUCGUG--CCAAC	1.30279	34	AUUGUGCACCACC	44.6797	49	AUGGUGCACCACC	75.5994		6		92.3589		0				91.2004
8	CCGCACAAA	3.46044	18	CCGCACAAA	16.2329	11	CCGCACGAA	6.28313	36	CCGCACAA	42.6546	49	CCGCACCAA	17.5307		8	AUAGCG--CCAUC	2.083	11	AUCGUG--CCACC	1.1501	36	AUUGUGCACCACC	42.6546	49	AUGGUGCACCUCC	17.5307		8		78.4279		1.09963				71.1991	0
8	CCGCACAAA	4.76223	21	CCGCACAAAA	18.2468	11	CCGCACGAA	1.30279	38	CCGCACAA	49.9526	49	CCGCACCAA	3.71489		8	AUAGCG--CCAAC	1.45632	12	AUCGUG--CCACC	13.6399	38	AUUGUGCACCACC	49.9526	49	AUGGUGCCCCACC	3.71489		11		51.6772		8.73602				24.7567	8.73602
8	CCGCACAAA	1.56209	21	CCGCACAAAA	1.43884	12	CCGCACGAA	13.6399	43	CCGCACAA	43.5	49	CCGCACCAA	1.07527		8	AUAGCG--CCAGC	1.45276	12	AUCGUG--CCAAC	1.05154	43	AUUGUGCACCACC	43.5	49	AUGGUGCUCCACC	1.07527		12		30.0515		14.6914				9.29309	14.6914
8	CCGCACAAA	64.0128	24	CCGCACAAAA	31.3387	12	CCGCACGAA	1.05154	46	CCGCACAAA	79.3779	52	CCGCACCAA	80.7862		8	AUAGCG--CCAAC	1.09963	14	AUCGUG--CCACC	61.7244	46	AUUGUGCACCACC	79.3779	52	AUGGUGCACCACC	80.7862		14		27.1321	0	65.4469				9.25196	65.4469
8	CCGCACAAA	2.083	24	CCGCACAAAA	1.11475	14	CCGCACGA	1.65652				52	CCGCACCAA	9.54877		8	AUAGCG--UCAAC	1.09459	14	AUCGUG--CCAAC	2.06599				52	AUGGUGCACCUCC	9.54877		16		0	14.8596	74.5038				0	74.5038
8	CCGCACAAA	1.45276	24	CCGCACAAAA	2.03383	14	CCGCACGAA	61.7244				52	CCGCACCAA	3.59713		11	AUAGCG--CCAAC	24.7567	14	AUCGUG--CCACC	1.65652				52	AUGGUGCCCCACC	3.59713		18			18.3747	75.2855					72.1214
8	CCGCACAAA	1.09459	27	CCGCACAAAA	31.0551	14	CCGCACGAA	2.06599				52	CCGCACCAA	1.69947		12	AUAGCG--CCAAC	7.21773	16	AUCGUG--CCACC	41.0403				52	AUGGUGCUCCACC	1.69947		21			19.6856	76.5421					75.4125
11	CCGCACAAA	2.42968	27	CCGCACAAAA	1.60617	16	CCGCACGA	32.0663								12	AUAGCG--CCAUC	2.07536	16	AUCGUG--CCACC	32.0663								24			34.4873	62.3427					62.2693
11	CCGCACAAA	16.1355	28	CCGCACAAAA	2.60931	16	CCGCACGA	1.39716								14	AUAGCG--CCAAC	9.25196	16	AUCGUG--CCAUC	1.39716								27			32.6613	62.0424					56.8266
11	CCGCACAAA	6.10444				16	CCGCACGAA	41.0403											18	AUCGUG--CCACC	51.7612								28			2.60931	85.1074	0				81.0606	0
11	CCGCACAAA	1.24853				18	CCGCACGA	2.13671											18	AUCGUG--CCACC	18.1764								31			0	56.1636	11.9912				48.7515	11.9912
11	CCGCACAAA	1.00242				18	CCGCACGA	1.02733											18	AUCGUG--CCAUC	2.18377								34				1.56298	44.6797				1.56298	44.6797
11	CCGCACAAA	24.7567				18	CCGCACGA	51.7612											21	AUCGUG--CCACC	58.4386								36				0	42.6546				0	42.6546
12	CCGCACAAA	7.06209				18	CCGCACGA	2.18377											21	AUCGUG--CCACC	16.9739								38					49.9526					49.9526
12	CCGCACAAA	13.6963				18	CCGCACGAA	18.1764											24	AUCGUG--CCACC	52.1936								43					43.5	0				43.5	0
12	CCGCACAAA	7.21773				21	CCGCACGAA	1.12964											24	AUCGUG--CCACC	8.04187								46					79.3779	7.35001				79.3779	7.35001
12	CCGCACAAA	2.07536				21	CCGCACGAA	58.4386											24	AUCGUG--CCACC	2.03383								49					0	97.9203				0	97.9203
14	CCGCACAAA	6.55367				21	CCGCACGAAA	16.9739											27	AUCGUG--CCACC	53.9757								52						95.6316					95.6316
14	CCGCACAAA	10.0478				24	CCGCACGAA	2.10729											27	AUCGUG--CCACC	1.60617
14	CCGCACAAA	1.2787				24	CCGCACGAA	52.1936											27	AUCGUG--CCACC	1.24475
14	CCGCACAAA	9.25196				24	CCGCACGAAA	8.04187											28	UAUCGUG--CCACC	54.4559
						27	CCGCACGAA	1.1276											28	GAUCGUG--CCACC	18.7857
						27	CCGCACGAA	5.6943											28	AAUCGUG--CCACC	5.58578
						27	CCGCACGAA	53.9757											28	CAUCGUG--CCACC	2.23319
						27	CCGCACGAAA	1.24475											31	AUCGUG--CCACC	48.7515
						28	CCGCACGAA	2.89256											34	AUCGUG--CCACC	1.56298
						28	CCGCACGAA	1.15422
						28	CCGCACGAA	54.4559
						28	CCGCACGAA	18.7857
						28	CCGCACGAA	5.58578
						28	CCGCACGAA	2.23319
						31	CCGCACGAA	4.80054
						31	CCGCACGAA	1.44012
						31	CCGCACGAA	1.17149
						31	CCGCACGAA	48.7515
						34	CCGCACGAAA	1.56298

## Sheet: P8 5´ strand
round	cluster	nucleotides 9–17	freq. (%)	5' strand type			wt	24-3	38-6	52-2
18	11.3	CCGCACAA	2.1418	1		5' strand type	1	5	1	4
31	38-6	CCGCACAA	11.9912	1		first round	6	11	31	46
36	38-6	CCGCACAA	42.6546	1		last round	14	34	46	52
38	38-6	CCGCACAA	49.9526	1
43	38-6	CCGCACAA	43.5	1		5' strands associated with named variants by round
6	6.1	CCGCACAAA	1.1585	1		wt			wt-like			24-3			38-6			52-2
6	wt	CCGCACAAA	91.2004	1		round	nucleotides 9–17	freq. (%)	round	nucleotides 9–17	freq. (%)	round	nucleotides 9–17	freq. (%)	round	nucleotides 9–17	freq. (%)	round	nucleotides 9–17	freq. (%)
8	6.1	CCGCACAAA	3.46044	1		6	CCGCACAAA	1.1585	16	CCGCACAAA	14.8596	8	CCGCACGAA	1.09963	31	CCGCACAA	11.9912	46	CCGCACCAA	7.35001
8	8.1	CCGCACAAA	4.76223	1		6	CCGCACAAA	91.2004	18	CCGCACAA	2.1418	11	CCGCACGA	1.1501	34	CCGCACAAA	44.6797	49	CCGCACCAA	75.5994
8	8.3	CCGCACAAA	1.56209	1		8	CCGCACAAA	3.46044	18	CCGCACAAA	16.2329	11	CCGCACGAA	6.28313	36	CCGCACAA	42.6546	49	CCGCACCAA	17.5307
8	wt	CCGCACAAA	64.0128	1		8	CCGCACAAA	4.76223	21	CCGCACAAAA	18.2468	11	CCGCACGAA	1.30279	38	CCGCACAA	49.9526	49	CCGCACCAA	3.71489
8	wt	CCGCACAAA	2.083	1		8	CCGCACAAA	1.56209	21	CCGCACAAAA	1.43884	12	CCGCACGAA	13.6399	43	CCGCACAA	43.5	49	CCGCACCAA	1.07527
8	wt	CCGCACAAA	1.45276	1		8	CCGCACAAA	64.0128	24	CCGCACAAAA	31.3387	12	CCGCACGAA	1.05154	46	CCGCACAAA	79.3779	52	CCGCACCAA	80.7862
8	wt	CCGCACAAA	1.09459	1		8	CCGCACAAA	2.083	24	CCGCACAAAA	1.11475	14	CCGCACGA	1.65652				52	CCGCACCAA	9.54877
11	8.1	CCGCACAAA	2.42968	1		8	CCGCACAAA	1.45276	24	CCGCACAAAA	2.03383	14	CCGCACGAA	61.7244				52	CCGCACCAA	3.59713
11	11.2	CCGCACAAA	16.1355	1		8	CCGCACAAA	1.09459	27	CCGCACAAAA	31.0551	14	CCGCACGAA	2.06599				52	CCGCACCAA	1.69947
11	11.3	CCGCACAAA	6.10444	1		11	CCGCACAAA	2.42968	27	CCGCACAAAA	1.60617	16	CCGCACGA	32.0663
11	11.4	CCGCACAAA	1.24853	1		11	CCGCACAAA	16.1355	28	CCGCACAAAA	2.60931	16	CCGCACGA	1.39716
11	11.4	CCGCACAAA	1.00242	1		11	CCGCACAAA	6.10444				16	CCGCACGAA	41.0403
11	wt	CCGCACAAA	24.7567	1		11	CCGCACAAA	1.24853				18	CCGCACGA	2.13671
12	11.2	CCGCACAAA	7.06209	1		11	CCGCACAAA	1.00242				18	CCGCACGA	1.02733
12	11.3	CCGCACAAA	13.6963	1		11	CCGCACAAA	24.7567				18	CCGCACGA	51.7612
12	wt	CCGCACAAA	7.21773	1		12	CCGCACAAA	7.06209				18	CCGCACGA	2.18377
12	wt	CCGCACAAA	2.07536	1		12	CCGCACAAA	13.6963				18	CCGCACGAA	18.1764
14	11.2	CCGCACAAA	6.55367	1		12	CCGCACAAA	7.21773				21	CCGCACGAA	1.12964
14	11.3	CCGCACAAA	10.0478	1		12	CCGCACAAA	2.07536				21	CCGCACGAA	58.4386
14	14.1	CCGCACAAA	1.2787	1		14	CCGCACAAA	6.55367				21	CCGCACGAAA	16.9739
14	wt	CCGCACAAA	9.25196	1		14	CCGCACAAA	10.0478				24	CCGCACGAA	2.10729
16	14.1	CCGCACAAA	14.8596	1		14	CCGCACAAA	1.2787				24	CCGCACGAA	52.1936
18	14.1	CCGCACAAA	16.2329	1		14	CCGCACAAA	9.25196				24	CCGCACGAAA	8.04187
34	38-6	CCGCACAAA	44.6797	1								27	CCGCACGAA	1.1276
46	38-6	CCGCACAAA	79.3779	1								27	CCGCACGAA	5.6943
21	14.1	CCGCACAAAA	18.2468	1								27	CCGCACGAA	53.9757
21	14.1	CCGCACAAAA	1.43884	1								27	CCGCACGAAA	1.24475
24	14.1	CCGCACAAAA	31.3387	1								28	CCGCACGAA	2.89256
24	14.1	CCGCACAAAA	1.11475	1								28	CCGCACGAA	1.15422
24	24.2	CCGCACAAAA	2.03383	1								28	CCGCACGAA	54.4559
27	14.1	CCGCACAAAA	31.0551	1								28	CCGCACGAA	18.7857
27	24.2	CCGCACAAAA	1.60617	1								28	CCGCACGAA	5.58578
28	14.1	CCGCACAAAA	2.60931	1								28	CCGCACGAA	2.23319
31	31.1	CCGCACACA	17.8337	2								31	CCGCACGAA	4.80054
43	31.1	CCGCACACA	38.3	2								31	CCGCACGAA	1.44012
34	31.1	CCGCACACAA	1.81899	2								31	CCGCACGAA	1.17149
46	31.1	CCGCACACAA	3.44945	2								31	CCGCACGAA	48.7515
8	8.2	CCGCACAGA	1.63074	3								34	CCGCACGAAA	1.56298
8	8.4	CCGCACAGA	1.45632	3
11	11.5	CCGCACAGA	1.14237	3
16	11.5	CCGCACAGA	1.66921	3
46	52-2	CCGCACCAA	7.35001	4
49	52-2	CCGCACCAA	75.5994	4
49	52-2	CCGCACCAA	17.5307	4
49	52-2	CCGCACCAA	3.71489	4
49	52-2	CCGCACCAA	1.07527	4		5' strand representation of named variants
52	52-2	CCGCACCAA	80.7862	4		round	wt	wt-like	24-3	38-6	52-2
52	52-2	CCGCACCAA	9.54877	4		6	92.3589	0	0	0	0
52	52-2	CCGCACCAA	3.59713	4		8	78.4279	0	1.09963	0	0
52	52-2	CCGCACCAA	1.69947	4		11	51.6772	0	8.73602	0	0
11	24-3	CCGCACGA	1.1501	5		12	30.0515	0	14.6914	0	0
14	24-3	CCGCACGA	1.65652	5		14	27.1321	0	65.4469	0	0
16	24-3	CCGCACGA	32.0663	5		16	0	14.8596	74.5038	0	0
16	24-3	CCGCACGA	1.39716	5		18	0	18.3747	75.2855	0	0
18	18.1	CCGCACGA	2.13671	5		21	0	19.6856	76.5421	0	0
18	18.1	CCGCACGA	1.02733	5		24	0	34.4873	62.3427	0	0
18	24-3	CCGCACGA	51.7612	5		27	0	32.6613	62.0424	0	0
18	24-3	CCGCACGA	2.18377	5		28	0	2.60931	85.1074	0	0
8	8.5	CCGCACGAA	1.09963	5		31	0	0	56.1636	11.9912	0
11	24-3	CCGCACGAA	6.28313	5		34	0	0	1.56298	44.6797	0
11	24-3	CCGCACGAA	1.30279	5		36	0	0	0	42.6546	0
12	24-3	CCGCACGAA	13.6399	5		38	0	0	0	49.9526	0
12	24-3	CCGCACGAA	1.05154	5		43	0	0	0	43.5	0
14	24-3	CCGCACGAA	61.7244	5		46	0	0	0	79.3779	7.35001
14	24-3	CCGCACGAA	2.06599	5		49	0	0	0	0	97.9203
16	24-3	CCGCACGAA	41.0403	5		52	0	0	0	0	95.6316
18	24-3	CCGCACGAA	18.1764	5
21	18.1	CCGCACGAA	1.12964	5
21	24-3	CCGCACGAA	58.4386	5
24	24.1	CCGCACGAA	2.10729	5
24	24-3	CCGCACGAA	52.1936	5
27	18.1	CCGCACGAA	1.1276	5
27	24.1	CCGCACGAA	5.6943	5
27	24-3	CCGCACGAA	53.9757	5
28	18.1	CCGCACGAA	2.89256	5
28	18.1	CCGCACGAA	1.15422	5
28	24-3	CCGCACGAA	54.4559	5
28	24-3	CCGCACGAA	18.7857	5
28	24-3	CCGCACGAA	5.58578	5
28	24-3	CCGCACGAA	2.23319	5
31	18.1	CCGCACGAA	4.80054	5
31	31.4	CCGCACGAA	1.44012	5
31	31.5	CCGCACGAA	1.17149	5
31	24-3	CCGCACGAA	48.7515	5
21	24-3	CCGCACGAAA	16.9739	5
24	24-3	CCGCACGAAA	8.04187	5
27	24-3	CCGCACGAAA	1.24475	5
34	24-3	CCGCACGAAA	1.56298	5
31	31.3	CCGCACGACA	2.72888	6
36	31.3	CCGCACGACA	53.0669	6
38	31.3	CCGCACGACA	47.0404	6
43	31.3	CCGCACGACA	3.2	6
34	31.3	CCGCACGACAA	46.1177	6
31	31.2	CCGCACGGA	4.18049	7
36	31.2	CCGCACGGA	1.70308	7
38	31.2	CCGCACGGA	1.32421	7
43	31.2	CCGCACGGA	9.4	7
34	31.2	CCGCACGGAA	3.50159	7
18	18.2	CCGCACUA	1.02996	8
11	11.1	CCGCACUAA	27.046	8
11	11.1	CCGCACUAA	1.49465	8
12	11.1	CCGCACUAA	45.2221	8
12	11.1	CCGCACUAA	1.59388	8
14	11.1	CCGCACUAA	2.49924	8
27	18.2	CCGCACUAA	2.08897	8
28	18.2	CCGCACUAA	8.53296	8
31	18.2	CCGCACUAA	3.61142	8
31	18.2	CCGCACUAA	1.24622	8
46	46.1	CCGCACUAA	2.57946	8

## Sheet: P8 3´ strand
round	cluster	nucleotides 83–95	nucleotides 83–89	freq. (%)	3' strand type			wt	24-3	38-6	52-2
31	31.4	----------ACC	-------	1.44012	1		3' strand type	6	10	16	13
8	8.3	ACAGCG--CCAGC	ACAGCG-	1.56209	2		first round	6	11	31	46
31	31.2	ACCGUG--CCACC	ACCGUG-	4.18049	3		last round	14	34	46	52
34	31.2	ACCGUG--CCACC	ACCGUG-	3.50159	3
36	31.2	ACCGUG--CCACC	ACCGUG-	1.70308	3		3' strands associated with named variants by round
38	31.2	ACCGUG--CCACC	ACCGUG-	1.32421	3		wt			24-3			38-6			52-2
43	31.2	ACCGUG--CCACC	ACCGUG-	9.4	3		round	nucleotides 83–95	freq. (%)	round	nucleotides 83–95	freq. (%)	round	nucleotides 83–95	freq. (%)	round	nucleotides 83–95	freq. (%)
11	11.5	ACUGUG--CCACC	ACUGUG-	1.14237	4		6	AUAGCG--CCAAC	91.2004	11	AUCGUG--CCACC	6.28313	31	AUUGUGCACCACC	11.9912	46	AUGGUGCACCACC	7.35001
16	11.5	ACUGUG--CCACC	ACUGUG-	1.66921	4		8	AUAGCG--CCAAC	64.0128	11	AUCGUG--CCAAC	1.30279	34	AUUGUGCACCACC	44.6797	49	AUGGUGCACCACC	75.5994
31	31.1	AGUGUG--CCACC	AGUGUG-	17.8337	5		8	AUAGCG--CCAUC	2.083	11	AUCGUG--CCACC	1.1501	36	AUUGUGCACCACC	42.6546	49	AUGGUGCACCUCC	17.5307
34	31.1	AGUGUG--CCACC	AGUGUG-	1.81899	5		8	AUAGCG--CCAAC	1.45632	12	AUCGUG--CCACC	13.6399	38	AUUGUGCACCACC	49.9526	49	AUGGUGCCCCACC	3.71489
43	31.1	AGUGUG--CCACC	AGUGUG-	38.3	5		8	AUAGCG--CCAGC	1.45276	12	AUCGUG--CCAAC	1.05154	43	AUUGUGCACCACC	43.5	49	AUGGUGCUCCACC	1.07527
46	31.1	AGUGUG--CCACC	AGUGUG-	3.44945	5		8	AUAGCG--CCAAC	1.09963	14	AUCGUG--CCACC	61.7244	46	AUUGUGCACCACC	79.3779	52	AUGGUGCACCACC	80.7862
6	wt	AUAGCG--CCAAC	AUAGCG-	91.2004	6		8	AUAGCG--UCAAC	1.09459	14	AUCGUG--CCAAC	2.06599				52	AUGGUGCACCUCC	9.54877
8	wt	AUAGCG--CCAAC	AUAGCG-	64.0128	6		11	AUAGCG--CCAAC	24.7567	14	AUCGUG--CCACC	1.65652				52	AUGGUGCCCCACC	3.59713
8	wt	AUAGCG--CCAUC	AUAGCG-	2.083	6		12	AUAGCG--CCAAC	7.21773	16	AUCGUG--CCACC	41.0403				52	AUGGUGCUCCACC	1.69947
8	8.4	AUAGCG--CCAAC	AUAGCG-	1.45632	6		12	AUAGCG--CCAUC	2.07536	16	AUCGUG--CCACC	32.0663
8	wt	AUAGCG--CCAGC	AUAGCG-	1.45276	6		14	AUAGCG--CCAAC	9.25196	16	AUCGUG--CCAUC	1.39716
8	8.5	AUAGCG--CCAAC	AUAGCG-	1.09963	6					18	AUCGUG--CCACC	51.7612
8	wt	AUAGCG--UCAAC	AUAGCG-	1.09459	6					18	AUCGUG--CCACC	18.1764
11	wt	AUAGCG--CCAAC	AUAGCG-	24.7567	6					18	AUCGUG--CCAUC	2.18377
12	wt	AUAGCG--CCAAC	AUAGCG-	7.21773	6					21	AUCGUG--CCACC	58.4386
12	wt	AUAGCG--CCAUC	AUAGCG-	2.07536	6					21	AUCGUG--CCACC	16.9739
14	wt	AUAGCG--CCAAC	AUAGCG-	9.25196	6					24	AUCGUG--CCACC	52.1936
11	11.1	AUAGUG--CCAAC	AUAGUG-	27.046	7					24	AUCGUG--CCACC	8.04187
11	11.1	AUAGUG--CCACC	AUAGUG-	1.49465	7					24	AUCGUG--CCACC	2.03383
12	11.1	AUAGUG--CCAAC	AUAGUG-	45.2221	7					27	AUCGUG--CCACC	53.9757
12	11.1	AUAGUG--CCACC	AUAGUG-	1.59388	7					27	AUCGUG--CCACC	1.60617
14	11.1	AUAGUG--CCAAC	AUAGUG-	2.49924	7					27	AUCGUG--CCACC	1.24475
46	46.1	AUAGUGCACCACC	AUAGUGC	2.57946	8					28	UAUCGUG--CCACC	54.4559
11	11.4	AUCGCG--CCACC	AUCGCG-	1.24853	9					28	GAUCGUG--CCACC	18.7857
11	11.4	AUCGCG--CCAAC	AUCGCG-	1.00242	9					28	AAUCGUG--CCACC	5.58578
11	24-3	AUCGUG--CCACC	AUCGUG-	6.28313	10					28	CAUCGUG--CCACC	2.23319
11	24-3	AUCGUG--CCAAC	AUCGUG-	1.30279	10					31	AUCGUG--CCACC	48.7515
11	24-3	AUCGUG--CCACC	AUCGUG-	1.1501	10					34	AUCGUG--CCACC	1.56298
12	24-3	AUCGUG--CCACC	AUCGUG-	13.6399	10
12	24-3	AUCGUG--CCAAC	AUCGUG-	1.05154	10
14	24-3	AUCGUG--CCACC	AUCGUG-	61.7244	10			3' strand representation of named variants
14	24-3	AUCGUG--CCAAC	AUCGUG-	2.06599	10		round	wt	24-3	38-6	52-2
14	24-3	AUCGUG--CCACC	AUCGUG-	1.65652	10		6	91.2004	0	0	0
16	24-3	AUCGUG--CCACC	AUCGUG-	41.0403	10		8	71.1991	0	0	0
16	24-3	AUCGUG--CCACC	AUCGUG-	32.0663	10		11	24.7567	8.73602	0	0
16	24-3	AUCGUG--CCAUC	AUCGUG-	1.39716	10		12	9.29309	14.6914	0	0
18	24-3	AUCGUG--CCACC	AUCGUG-	51.7612	10		14	9.25196	65.4469	0	0
18	24-3	AUCGUG--CCACC	AUCGUG-	18.1764	10		16	0	74.5038	0	0
18	24-3	AUCGUG--CCAUC	AUCGUG-	2.18377	10		18	0	72.1214	0	0
21	24-3	AUCGUG--CCACC	AUCGUG-	58.4386	10		21	0	75.4125	0	0
21	24-3	AUCGUG--CCACC	AUCGUG-	16.9739	10		24	0	62.2693	0	0
24	24-3	AUCGUG--CCACC	AUCGUG-	52.1936	10		27	0	56.8266	0	0
24	24-3	AUCGUG--CCACC	AUCGUG-	8.04187	10		28	0	81.0606	0	0
24	24.2	AUCGUG--CCACC	AUCGUG-	2.03383	10		31	0	48.7515	11.9912	0
27	24-3	AUCGUG--CCACC	AUCGUG-	53.9757	10		34	0	1.56298	44.6797	0
27	24.2	AUCGUG--CCACC	AUCGUG-	1.60617	10		36	0	0	42.6546	0
27	24-3	AUCGUG--CCACC	AUCGUG-	1.24475	10		38	0	0	49.9526	0
28	24-3	UAUCGUG--CCACC	AUCGUG-	54.4559	10		43	0	0	43.5	0
28	24-3	GAUCGUG--CCACC	AUCGUG-	18.7857	10		46	0	0	79.3779	7.35001
28	24-3	AAUCGUG--CCACC	AUCGUG-	5.58578	10		49	0	0	0	97.9203
28	24-3	CAUCGUG--CCACC	AUCGUG-	2.23319	10		52	0	0	0	95.6316
31	24-3	AUCGUG--CCACC	AUCGUG-	48.7515	10
34	24-3	AUCGUG--CCACC	AUCGUG-	1.56298	10
6	6.1	AUGGCG--CCAAC	AUGGCG-	1.1585	11
8	6.1	AUGGCG--CCAAC	AUGGCG-	3.46044	11
8	8.2	AUGGCG--CCAAC	AUGGCG-	1.63074	11
11	11.2	AUGGCU--CGAAG	AUGGCU-	16.1355	12
12	11.2	AUGGCU--CGAAG	AUGGCU-	7.06209	12
14	11.2	AUGGCU--CGAAG	AUGGCU-	6.55367	12
46	52-2	AUGGUGCACCACC	AUGGUGC	7.35001	13
49	52-2	AUGGUGCACCACC	AUGGUGC	75.5994	13
49	52-2	AUGGUGCACCUCC	AUGGUGC	17.5307	13
49	52-2	AUGGUGCCCCACC	AUGGUGC	3.71489	13
49	52-2	AUGGUGCUCCACC	AUGGUGC	1.07527	13
52	52-2	AUGGUGCACCACC	AUGGUGC	80.7862	13
52	52-2	AUGGUGCACCUCC	AUGGUGC	9.54877	13
52	52-2	AUGGUGCCCCACC	AUGGUGC	3.59713	13
52	52-2	AUGGUGCUCCACC	AUGGUGC	1.69947	13
21	14.1	AU-GUG--CCACC	AU-GUG-	1.43884	14
24	14.1	AU-GUG--CCACC	AU-GUG-	31.3387	14
24	24.1	AU-GUG--CCACC	AU-GUG-	2.10729	14
11	11.3	AUUGUG--CCACC	AUUGUG-	6.10444	15
12	11.3	AUUGUG--CCACC	AUUGUG-	13.6963	15
14	11.3	AUUGUG--CCACC	AUUGUG-	10.0478	15
18	11.3	AUUGUG--CCAAC	AUUGUG-	2.1418	15
31	38-6	AUUGUGCACCACC	AUUGUGC	11.9912	16
34	38-6	AUUGUGCACCACC	AUUGUGC	44.6797	16
36	38-6	AUUGUGCACCACC	AUUGUGC	42.6546	16
38	38-6	AUUGUGCACCACC	AUUGUGC	49.9526	16
43	38-6	AUUGUGCACCACC	AUUGUGC	43.5	16
46	38-6	AUUGUGCACCACC	AUUGUGC	79.3779	16
8	8.1	CAAGCG--CCAAC	CAAGCG-	4.76223	17
11	8.1	CAAGCG--CCAAC	CAAGCG-	2.42968	17
31	31.3	GUCGUG--CCAGC	GUCGUG-	2.72888	18
34	31.3	GUCGUG--CCAGC	GUCGUG-	46.1177	18
36	31.3	GUCGUG--CCAGC	GUCGUG-	53.0669	18
38	31.3	GUCGUG--CCAGC	GUCGUG-	47.0404	18
43	31.3	GGUCGUG--CCAGC	GUCGUG-	3.2	18
24	14.1	---GUG--CCACC	---GUG-	1.11475	19
28	18.2	UUAGUG--CCACC	UAGUG-	8.53296	20
31	31.5	----UG--CCACC	----UG-	1.17149	21
14	14.1	-U-GUG--CCACC	-U-GUG-	1.2787	22
16	14.1	-U-GUG--CCACC	-U-GUG-	14.8596	22
18	14.1	-U-GUG--CCACC	-U-GUG-	16.2329	22
21	14.1	-U-GUG--CCACC	-U-GUG-	18.2468	22
27	14.1	-U-GUG--CCACC	-U-GUG-	31.0551	22
27	24.1	-U-GUG--CCACC	-U-GUG-	5.6943	22
28	14.1	-U-GUG--CCACC	-U-GUG-	2.60931	22
18	18.2	UUAGUG--CCACC	UUAGUG-	1.02996	23
27	18.2	UUAGUG--CCACC	UUAGUG-	2.08897	23
31	18.2	UUAGUG--CCACC	UUAGUG-	3.61142	23
31	18.2	UUAGUG--CCAAC	UUAGUG-	1.24622	23
18	18.1	UUCGUG--CCACC	UUCGUG-	2.13671	24
18	18.1	UUCGUG--CCAUC	UUCGUG-	1.02733	24
21	18.1	UUCGUG--CCACC	UUCGUG-	1.12964	24
27	18.1	UUCGUG--CCACC	UUCGUG-	1.1276	24
28	18.1	GUUCGUG--CCACC	UUCGUG-	2.89256	24
28	18.1	GUUCGUG--CCAUC	UUCGUG-	1.15422	24
31	18.1	UUCGUG--CCACC	UUCGUG-	4.80054	24
