# Supplementary material for: Witnessing the structural evolution of an RNA enzyme
Source: eLife. 2021 Sep 9;10:e71557. doi: 10.7554/eLife.71557 (PMC8460264; doi:10.7554/eLife.71557)
Supplement: Source data 1. [file elife-71557-supp5.xlsx]

## Sheet: summary
Supplementary file 2. Prevalent sequence clusters over the course of evolution
														round
round	clusters		round	name	freq. (%)			round	name	freq. (%)			freq. (%)	6	8	11	12	14	16	18	21	24	27	28	31	34	36	38	43	46	49	52
6	2		6	wt	91.2			6	wt	91.2			52-2																	7.35	97.92	95.64
8	10			6.1	1.16	92.36			6.1	1.16	92.36		31-3												2.73	46.11	53.07	47.04	3.2
11	11		8	wt	64.01			8	wt	70.19			31.2												4.18	3.5	1.7	1.32	9.4
12	8			8.1	4.76				6.1	3.46			38-6												11.99	44.68	42.65	49.95	43.5	79.38
14	7			6.1	3.46				8.1	4.76	78.41		31.1												17.83	1.82			38.3	3.45
16	4			wt	2.08			11	wt	24.76			24.2									2.03	1.61
18	7			8.2	1.63				8.1	2.43			24.1									2.11	5.69
21	4			wt	1.56				11.1	28.54			18.2							1.03			2.09	8.53	4.86
24	5			8.3	1.46				11.2	16.14			18.1							3.17	1.13		1.13	4.04	4.8
27	6			wt	1.45				24-3	8.58			14.1					1.28	14.86	16.23	19.69	32.45	31.06	2.61
28	4			8.4	1.1				11.3	6.1			11.5			1.14			1.67
31	10			wt	1.09	82.6			11.5	1.14	87.69		11.3			6.1	13.7	10.05		2.14
34	5		11	11.1	27.05			12	wt	9.3			24-3			8.58	14.69	65.45	74.51	72.12	75.41	60.23	55.22	81.07	48.75	1.56
36	3			wt	24.76				11.1	46.81			11.2			16.14	7.06	6.56
38	3			11.2	16.14				11.2	7.06			11.1			28.54	46.81	2.5
43	4			24-3	7.43				24-3	14.69			8.1		4.76	2.43
46	4			11.3	6.1				11.3	13.7	91.56		6.1	1.16	3.46
49	4			8.1	2.43			14	wt	9.25			wt	91.2	70.19	24.76	9.3	9.25
52	4			11.1	1.49				11.1	2.5				92.36	78.41	87.69	91.56	95.09	91.04	94.69	96.23	96.82	96.8	96.25	95.14	97.67	97.42	98.31	94.4	90.18	97.92	95.64
total	105			11.4	1.25				11.2	6.56
				24-3	1.15				24-3	65.45
				11.5	1.14				11.3	10.05
				11.4	1	89.94			14.1	1.28	95.09
			12	11.1	45.22			16	24-3	74.51
				11.3	13.7				11.5	1.67
				24-3	13.64				14.1	14.86	91.04
				wt	7.22			18	24-3	72.12
				11.2	7.06				11.3	2.14
				wt	2.08				14.1	16.23
				11.1	1.59				18.1	3.17
				24-3	1.05	91.56			18.2	1.03	94.69
			14	24-3	63.38			21	24-3	75.41
				11.3	10.05				14.1	19.69
				wt	9.25				18.1	1.13	96.23
				11.2	6.56			24	24-3	60.23
				11.1	2.5				14.1	32.45
				24-3	2.07				24.1	2.11
				14.1	1.28	95.09			24.2	2.03	96.82
			16	24-3	73.11			27	24-3	55.22
				14.1	14.86				14.1	31.06
				11.5	1.67				18.1	1.13
				24-3	1.4	91.04			18.2	2.09
			18	24-3	69.94				24.1	5.69
				14.1	16.23				24.2	1.61	96.8
				24-3	2.18			28	24-3	81.07
				11.3	2.14				14.1	2.61
				18.1	2.14				18.1	4.04
				18.2	1.03				18.2	8.53	96.25
				18.1	1.03	94.69		31	24-3	48.75
			21	24-3	75.41				18.1	4.8
				14.1	18.25				18.2	4.86
				14.1	1.44				31.1	17.83
				18.1	1.13	96.23			38-6	11.99
			24	24-3	60.23				31.2	4.18
				14.1	31.34				31.3	2.73	95.14
				24.1	2.11			34	24-3	1.56
				24.2	2.03				31.1	1.82
				14.1	1.11	96.82			38-6	44.68
			27	24-3	55.22				31.2	3.5
				14.1	31.06				31.3	46.11	97.67
				24.1	5.69			36	38-6	42.65
				18.2	2.09				31.2	1.7
				24.2	1.61				31.3	53.07	97.42
				18.1	1.13	96.8		38	38-6	49.95
			28	24-3	81.07				31.2	1.32
				18.2	8.53				31.3	47.04	98.31
				18.1	4.04			43	31.1	38.3
				14.1	2.61	96.25			38-6	43.5
			31	24-3	48.75				31.2	9.4
				31.1	17.83				31.3	3.2	94.4
				38-6	11.99			46	31.1	3.45
				18.1	4.8				38-6	79.38
				31.2	4.18				52-2	7.35	90.18
				18.2	3.61			49	52-2	97.92	97.92
				31.3	2.73			52	52-2	95.64	95.64
				31.4	1.44
				18.2	1.25
				31.5	1.17	97.75
			34	31.3	46.11
				38-6	44.68
				31.2	3.5
				31.1	1.82
				24-3	1.56	97.67
			36	31.3	53.07
				38-6	42.65
				31.2	1.7	97.42
			38	38-6	49.95
				31.3	47.04
				31.2	1.32	98.31
			43	38-6	43.5
				31.1	38.3
				31.2	9.4
				31.3	3.2	94.4
			46	38-6	79.38
				52-2	7.35
				31.1	3.45
				46.1	2.58	92.76
			49	52-2	75.6
				52-2	17.53
				52-2	3.71
				52-2	1.08	97.92
			52	52-2	80.79
				52-2	9.55
				52-2	3.6
				52-2	1.7	95.64
					Average:	94.4868

## Sheet: prevalent clusters
Supplementary file 2. Prevalent sequence clusters over the course of evolution
round	cluster	nucleotides 9–17	nucleotides 83–95	freq. (%)	notes
6	wt	CCGCACAAA	AUAGCG--CCAAC	91.2004
6	6.1	CCGCACAAA	AUGGCG--CCAAC	1.1585	mutation in original L7 loop, does not change P8 pairing potential.
8	wt	CCGCACAAA	AUAGCG--CCAAC	64.0128
8	8.1	CCGCACAAA	CAAGCG--CCAAC	4.76223	mutation in original L7 loop, does not change P8 pairing potential.
8	6.1	CCGCACAAA	AUGGCG--CCAAC	3.46044	mutations in L7 loop that do not change pairing
8	wt	CCGCACAAA	AUAGCG--CCAUC	2.083	mutation restoring base pair in P7
8	8.2	CCGCACAGA	AUGGCG--CCAAC	1.63074	mutations in J1/3 and L7 loop that do not change P8 pairing potential (note this is one of 3 to form 11.5 P8, but does not change pairing alone) (excluded from figure due to low abundance/persistence)
8	8.3	CCGCACAAA	ACAGCG--CCAGC	1.56209	mutation in L7 loop that does not change pairing
8	8.4	CCGCACAGA	AUAGCG--CCAAC	1.45632	mutation in J1/3 that does not change pairing (note this is one of 3 to form 11.5 P8, but does not change pairing alone) (excluded from figure due to low abundance/persistence)
8	wt	CCGCACAAA	AUAGCG--CCAGC	1.45276	mutation in P7 that does not change pairing
8	8.5	CCGCACGAA	AUAGCG--CCAAC	1.09963	mutation in J1/3 that does not change pairing (note this is one of 3 to form 24-3 P8, but does not change pairing alone) (excluded from figure due to low abundance/persistence)
8	wt	CCGCACAAA	AUAGCG--UCAAC	1.09459	mutation in P7 that does not change pairing
11	11.1	CCGCACUAA	AUAGUG--CCAAC	27.046	CACUA / UAGUG P8
11	wt	CCGCACAAA	AUAGCG--CCAAC	24.7567
11	11.2	CCGCACAAA	AUGGCU--CGAAG	16.1355	many disruptions to P7 pairs, but no corresponding P8 pairing
11	24-3	CCGCACGAA	AUCGUG--CCACC	6.28313	CACGA / UCGUG P8
11	11.3	CCGCACAAA	AUUGUG--CCACC	6.10444	CACAA / UUGUG P8
11	8.1	CCGCACAAA	CAAGCG--CCAAC	2.42968	mutation in original L7 loop, does not change P8 pairing potential.
11	11.1	CCGCACUAA	AUAGUG--CCACC	1.49465	CACUA / UAGUG P8
11	24-3	CCGCACGAA	AUCGUG--CCAAC	1.30279	CACGA / UCGUG P8
11	11.4	CCGCACAAA	AUCGCG--CCACC	1.24853	mutations in L7 loop that do not change pairing (note this is one of 3 to form 24-3 P8, but does not change pairing alone) (excluded from figure due to low abundance/persistence)
11	24-3	CCGCACGA	AUCGUG--CCACC	1.1501	CACGA / UCGUG P8
11	11.5	CCGCACAGA	ACUGUG--CCACC	1.14237	CACAG / CUGUG P8
11	11.4	CCGCACAAA	AUCGCG--CCAAC	1.00242	mutations in L7 loop that do not change pairing (note this is one of 3 to form 24-3 P8, but does not change pairing alone) (excluded from figure due to low abundance/persistence)
12	11.1	CCGCACUAA	AUAGUG--CCAAC	45.2221	CACUA / UAGUG P8
12	11.3	CCGCACAAA	AUUGUG--CCACC	13.6963	CACAA / UUGUG P8
12	24-3	CCGCACGAA	AUCGUG--CCACC	13.6399	CACGA / UCGUG P8
12	wt	CCGCACAAA	AUAGCG--CCAAC	7.21773
12	11.2	CCGCACAAA	AUGGCU--CGAAG	7.06209	many disruptions to P7 pairs, but no corresponding P8 pairing
12	wt	CCGCACAAA	AUAGCG--CCAUC	2.07536	mutation restoring base pair in P7
12	11.1	CCGCACUAA	AUAGUG--CCACC	1.59388	CACUA / UAGUG P8
12	24-3	CCGCACGAA	AUCGUG--CCAAC	1.05154	CACGA / UCGUG P8
14	24-3	CCGCACGAA	AUCGUG--CCACC	61.7244	CACGA / UCGUG P8
14	11.3	CCGCACAAA	AUUGUG--CCACC	10.0478	CACAA / UUGUG P8
14	wt	CCGCACAAA	AUAGCG--CCAAC	9.25196
14	11.2	CCGCACAAA	AUGGCU--CGAAG	6.55367	many disruptions to P7 pairs, but no corresponding P8 pairing
14	11.1	CCGCACUAA	AUAGUG--CCAAC	2.49924	CACUA / UAGUG P8
14	24-3	CCGCACGAA	AUCGUG--CCAAC	2.06599	CACGA / UCGUG P8
14	24-3	CCGCACGA	AUCGUG--CCACC	1.65652	CACGA / UCGUG P8
14	14.1	CCGCACAAA	-U-GUG--CCACC	1.2787	CACA / UGUG P8 plus deletion in J7/8 loop
16	24-3	CCGCACGAA	AUCGUG--CCACC	41.0403	CACGA / UCGUG P8
16	24-3	CCGCACGA	AUCGUG--CCACC	32.0663	CACGA / UCGUG P8
16	14.1	CCGCACAAA	-U-GUG--CCACC	14.8596	CACA / UGUG P8 plus deletion in J7/8 loop
16	11.5	CCGCACAGA	ACUGUG--CCACC	1.66921	CACAG / CUGUG P8
16	24-3	CCGCACGA	AUCGUG--CCAUC	1.39716	CACGA / UCGUG P8
18	24-3	CCGCACGA	AUCGUG--CCACC	51.7612	CACGA / UCGUG P8
18	24-3	CCGCACGAA	AUCGUG--CCACC	18.1764	CACGA / UCGUG P8
18	14.1	CCGCACAAA	-U-GUG--CCACC	16.2329	CACA / UGUG P8 plus deletion in J7/8 loop
18	24-3	CCGCACGA	AUCGUG--CCAUC	2.18377	CACGA / UCGUG P8
18	11.3	CCGCACAA	AUUGUG--CCAAC	2.1418	CACAA / UUGUG P8
18	18.1	CCGCACGA	UUCGUG--CCACC	2.13671	CACGAA / UUCGUG P8 (related to 24-3)
18	18.2	CCGCACUA	UUAGUG--CCACC	1.02996	CACUAA / UUAGUG P8 (related to 11.1)
18	18.1	CCGCACGA	UUCGUG--CCAUC	1.02733	CACGAA / UUCGUG P8 (related to 24-3)
21	24-3	CCGCACGAA	AUCGUG--CCACC	58.4386	CACGA / UCGUG P8
21	14.1	CCGCACAAAA	-U-GUG--CCACC	18.2468	CACA / UGUG P8 plus deletion in J7/8 loop
21	24-3	CCGCACGAAA	AUCGUG--CCACC	16.9739	CACGA / UCGUG P8
21	14.1	CCGCACAAAA	AU-GUG--CCACC	1.43884	CACA / UGUG P8 plus deletion in J7/8 loop
21	18.1	CCGCACGAA	UUCGUG--CCACC	1.12964	CACGAA / UUCGUG P8 (related to 24-3)
24	24-3	CCGCACGAA	AUCGUG--CCACC	52.1936	CACGA / UCGUG P8
24	14.1	CCGCACAAAA	AU-GUG--CCACC	31.3387	CACA / UGUG P8 plus deletion in J7/8 loop
24	24-3	CCGCACGAAA	AUCGUG--CCACC	8.04187	CACGA / UCGUG P8
24	24.1	CCGCACGAA	AU-GUG--CCACC	2.10729	appears to be 5' 24-3 / 3' 14.1
24	24.2	CCGCACAAAA	AUCGUG--CCACC	2.03383	appears to be 5' 14.1 / 3' 24-3
24	14.1	CCGCACAAAA	---GUG--CCACC	1.11475	CACA / UGUG P8 plus deletion in J7/8 loop (note that inclusion or exclusion of "AT" on 3'-strand is an artifact of alignment, all 14.1 variants have the same sequence in this region).
27	24-3	CCGCACGAA	AUCGUG--CCACC	53.9757	CACGA / UCGUG P8
27	14.1	CCGCACAAAA	-U-GUG--CCACC	31.0551	CACA / UGUG P8 plus deletion in J7/8 loop
27	24.1	CCGCACGAA	-U-GUG--CCACC	5.6943	appears to be 5' 24-3 / 3' 14.1
27	18.2	CCGCACUAA	UUAGUG--CCACC	2.08897	CACUAA / UUAGUG P8 (related to 11.1)
27	24.2	CCGCACAAAA	AUCGUG--CCACC	1.60617	appears to be 5' 14.1 / 3' 24-3
27	24-3	CCGCACGAAA	AUCGUG--CCACC	1.24475	CACGA / UCGUG P8
27	18.1	CCGCACGAA	UUCGUG--CCACC	1.1276	CACGAA / UUCGUG P8 (related to 24-3)
28	24-3	CCGCACGAA	UAUCGUG--CCACC	54.4559	CACGA / UCGUG P8
28	24-3	CCGCACGAA	GAUCGUG--CCACC	18.7857	CACGA / UCGUG P8
28	18.2	CCGCACUAA	UUAGUG--CCACC	8.53296	CACUAA / UUAGUG P8 (related to 11.1)
28	24-3	CCGCACGAA	AAUCGUG--CCACC	5.58578	CACGA / UCGUG P8
28	18.1	CCGCACGAA	GUUCGUG--CCACC	2.89256	CACGAA / UUCGUG P8 (related to 24-3)
28	14.1	CCGCACAAAA	-U-GUG--CCACC	2.60931	CACA / UGUG P8 plus deletion in J7/8 loop
28	24-3	CCGCACGAA	CAUCGUG--CCACC	2.23319	CACGA / UCGUG P8
28	18.1	CCGCACGAA	GUUCGUG--CCAUC	1.15422	CACGAA / UUCGUG P8 (related to 24-3)
31	24-3	CCGCACGAA	AUCGUG--CCACC	48.7515	CACGA / UCGUG P8
31	31.1	CCGCACACA	AGUGUG--CCACC	17.8337	CACAC / GUGUG P8
31	38-6	CCGCACAA	AUUGUGCACCACC	11.9912	GCACAA / UUGUGC P8
31	18.1	CCGCACGAA	UUCGUG--CCACC	4.80054	CACGAA / UUCGUG P8 (related to 24-3)
31	31.2	CCGCACGGA	ACCGUG--CCACC	4.18049	CACGG / CCGUG P8
31	18.2	CCGCACUAA	UUAGUG--CCACC	3.61142	CACUAA / UUAGUG P8 (related to 11.1)
31	31.3	CCGCACGACA	GUCGUG--CCAGC	2.72888	CACGAC / GUCGUG P8
31	31.4	CCGCACGAA	----------ACC	1.44012	this deletes nearly all of the P8/P7 region, leaving a 4nt hairpin: CGGU - GG - ACCG (excluded from figure due to low abundance/persistence)
31	18.2	CCGCACUAA	UUAGUG--CCAAC	1.24622	CACUAA / UUAGUG P8 (related to 11.1)
31	31.5	CCGCACGAA	----UG--CCACC	1.17149	similar to 31.4, hairpin is CGGUG-C-CACCG (excluded from figure due to low abundance/persistence)
34	31.3	CCGCACGACAA	GUCGUG--CCAGC	46.1177	CACGAC / GUCGUG P8
34	38-6	CCGCACAAA	AUUGUGCACCACC	44.6797	GCACAA / UUGUGC P8
34	31.2	CCGCACGGAA	ACCGUG--CCACC	3.50159	CACGG / CCGUG P8
34	31.1	CCGCACACAA	AGUGUG--CCACC	1.81899	CACAC / GUGUG P8
34	24-3	CCGCACGAAA	AUCGUG--CCACC	1.56298	CACGA / UCGUG P8
36	31.3	CCGCACGACA	GUCGUG--CCAGC	53.0669	CACGAC / GUCGUG P8
36	38-6	CCGCACAA	AUUGUGCACCACC	42.6546	GCACAA / UUGUGC P8
36	31.2	CCGCACGGA	ACCGUG--CCACC	1.70308	CACGG / CCGUG P8
38	38-6	CCGCACAA	AUUGUGCACCACC	49.9526	GCACAA / UUGUGC P8
38	31.3	CCGCACGACA	GUCGUG--CCAGC	47.0404	CACGAC / GUCGUG P8
38	31.2	CCGCACGGA	ACCGUG--CCACC	1.32421	CACGG / CCGUG P8
43	38-6	CCGCACAA	AUUGUGCACCACC	43.5	GCACAA / UUGUGC P8
43	31.1	CCGCACACA	AGUGUG--CCACC	38.3	CACAC / GUGUG P8
43	31.2	CCGCACGGA	ACCGUG--CCACC	9.4	CACGG / CCGUG P8
43	31.3	CCGCACGACA	GGUCGUG--CCAGC	3.2	CACGAC / GUCGUG P8
46	38-6	CCGCACAAA	AUUGUGCACCACC	79.3779	GCACAA / UUGUGC P8
46	52-2	CCGCACCAA	AUGGUGCACCACC	7.35001	GCACCA / UGGUGC P8
46	31.1	CCGCACACAA	AGUGUG--CCACC	3.44945	CACAC / GUGUG P8
46	46.1	CCGCACUAA	AUAGUGCACCACC	2.57946	GCACUA / UAGUGC P8 (excluded from figure due to low abundance/persistence)
49	52-2	CCGCACCAA	AUGGUGCACCACC	75.5994	GCACCA / UGGUGC P8
49	52-2	CCGCACCAA	AUGGUGCACCUCC	17.5307	GCACCA / UGGUGC P8
49	52-2	CCGCACCAA	AUGGUGCCCCACC	3.71489	GCACCA / UGGUGC P8 (A90C mutation)
49	52-2	CCGCACCAA	AUGGUGCUCCACC	1.07527	GCACCA / UGGUGC P8 (A90U mutation)
52	52-2	CCGCACCAA	AUGGUGCACCACC	80.7862	GCACCA / UGGUGC P8
52	52-2	CCGCACCAA	AUGGUGCACCUCC	9.54877	GCACCA / UGGUGC P8
52	52-2	CCGCACCAA	AUGGUGCCCCACC	3.59713	GCACCA / UGGUGC P8 (A90C mutation)
52	52-2	CCGCACCAA	AUGGUGCUCCACC	1.69947	GCACCA / UGGUGC P8 (A90U mutation)

## Sheet: prevalent clusters (R6–28)
Supplementary file 2. Prevalent sequence clusters over the course of evolution
round	cluster #	reads	freq. (%)	representative	sequence	5´ sequence	3´ sequence	position 15+	cluster name	notes
6	7	12743568	91.2004	1519	CCGCACAAA*ATAGCGCCAAC	CCGCACAAA	ATAGCGCCAAC	AAAAA	wt
6	20	161879	1.1585	2417	CCGCACAAA*ATGGCGCCAAC	CCGCACAAA	ATGGCGCCAAC	AAAAA	6.1	mutations in L7 loop that do not change pairing
8	24	9974613	64.0128	2099	CCGCACAAA*ATAGCGCCAAC	CCGCACAAA	ATAGCGCCAAC	AAAAA	wt
8	122	742061	4.76223	1686	CCGCACAAA*CAAGCGCCAAC	CCGCACAAA	CAAGCGCCAAC	AAAAA	8.1	mutations in L7 loop that do not change pairing
8	25	539214	3.46044	2885	CCGCACAAA*ATGGCGCCAAC	CCGCACAAA	ATGGCGCCAAC	AAAAA	6.1	mutations in L7 loop that do not change pairing
8	39	324577	2.083	1066	CCGCACAAA*ATAGCGCCATC	CCGCACAAA	ATAGCGCCATC	AAAAA	wt	mutation restoring base pair in P7
8	37	254106	1.63074	1189	CCGCACAGA*ATGGCGCCAAC	CCGCACAGA	ATGGCGCCAAC	AGAAA	8.2	mutations in J1/3 and L7 loop that do not change pairing
8	92	243408	1.56209	2400	CCGCACAAA*ACAGCGCCAGC	CCGCACAAA	ACAGCGCCAGC	AAAAA	8.3	mutation in P7 that does not change pairing
8	18	226927	1.45632	1469	CCGCACAGA*ATAGCGCCAAC	CCGCACAGA	ATAGCGCCAAC	AGAAA	8.4	mutation in J1/3 that does not change pairing
8	32	226373	1.45276	1302	CCGCACAAA*ATAGCGCCAGC	CCGCACAAA	ATAGCGCCAGC	AAAAA	wt	mutation in P7 that does not change pairing
8	40	171347	1.09963	1954	CCGCACGAA*ATAGCGCCAAC	CCGCACGAA	ATAGCGCCAAC	GAAAA	8.5	mutation in J1/3 that does not change pairing (note this is one of 3 to form 24-3 P8, but does not change pairing alone)
8	36	170561	1.09459	1010	CCGCACAAA*ATAGCGTCAAC	CCGCACAAA	ATAGCGTCAAC	AAAAA	wt	mutation in P7 that does not change pairing
11	51	1277426	27.046	2499	CCGCACTAA*ATAGTGCCAAC	CCGCACTAA	ATAGTGCCAAC	TAAAA	11.1	CACUA / UAGUG P8
11	23	1169299	24.7567	1029	CCGCACAAA*ATAGCGCCAAC	CCGCACAAA	ATAGCGCCAAC	AAAAA	wt
11	7	762105	16.1355	1950	CCGCACAAA*ATGGCTCGAAG	CCGCACAAA	ATGGCTCGAAG	AAAAA	11.2	many disruptions to P7 pairs, but no corresponding P8 pairing
11	43	296763	6.28313	1224	CCGCACGAA*ATCGTGCCACC	CCGCACGAA	ATCGTGCCACC	GAAAA	24-3	CACGA / UCGUG P8
11	39	288323	6.10444	2708	CCGCACAAA*ATTGTGCCACC	CCGCACAAA	ATTGTGCCACC	AAAAA	11.3	CACAA / UUGUG P8
11	19	114758	2.42968	2448	CCGCACAAA*CAAGCGCCAAC	CCGCACAAA	CAAGCGCCAAC	AAAAA	8.1	mutations in L7 loop that do not change pairing
11	34	70595	1.49465	1055	CCGCACTAA*ATAGTGCCACC	CCGCACTAA	ATAGTGCCACC	TAAAA	11.1	CACUA / UAGUG P8
11	47	61533	1.30279	1273	CCGCACGAA*ATCGTGCCAAC	CCGCACGAA	ATCGTGCCAAC	GAAAA	24-3	CACGA / UCGUG P8
11	42	58970	1.24853	3371	CCGCACAAA*ATCGCGCCACC	CCGCACAAA	ATCGCGCCACC	AAAAA	11.4	mutations in L7 loop that do not change pairing (note this is one of 3 to form 24-3 P8, but does not change pairing alone)
11	57	54321	1.1501	1020	CCGCACGA*ATCGTGCCACC	CCGCACGA	ATCGTGCCACC	GAAA	24-3	CACGA / UCGUG P8
11	37	53956	1.14237	1769	CCGCACAGA*ACTGTGCCACC	CCGCACAGA	ACTGTGCCACC	AGAAA	11.5	CACAG / CUGUG P8
11	20	47346	1.00242	1564	CCGCACAAA*ATCGCGCCAAC	CCGCACAAA	ATCGCGCCAAC	AAAAA	11.4	mutations in L7 loop that do not change pairing (note this is one of 3 to form 24-3 P8, but does not change pairing alone)
12	29	6.08968e+06	45.2221	10030	CCGCACTAA*ATAGTGCCAAC	CCGCACTAA	ATAGTGCCAAC	TAAAA	11.1	CACUA / UAGUG P8
12	56	1844365	13.6963	1292	CCGCACAAA*ATTGTGCCACC	CCGCACAAA	ATTGTGCCACC	AAAAA	11.3	CACAA / UUGUG P8
12	48	1836762	13.6399	1929	CCGCACGAA*ATCGTGCCACC	CCGCACGAA	ATCGTGCCACC	GAAAA	24-3	CACGA / UCGUG P8
12	14	971950	7.21773	1167	CCGCACAAA*ATAGCGCCAAC	CCGCACAAA	ATAGCGCCAAC	AAAAA	wt
12	10	950991	7.06209	2246	CCGCACAAA*ATGGCTCGAAG	CCGCACAAA	ATGGCTCGAAG	AAAAA	11.2	many disruptions to P7 pairs, but no corresponding P8 pairing
12	16	279471	2.07536	1188	CCGCACAAA*ATAGCGCCATC	CCGCACAAA	ATAGCGCCATC	AAAAA	wt	mutation restoring base pair in P7
12	39	214634	1.59388	1045	CCGCACTAA*ATAGTGCCACC	CCGCACTAA	ATAGTGCCACC	TAAAA	11.1	CACUA / UAGUG P8
12	51	141602	1.05154	1409	CCGCACGAA*ATCGTGCCAAC	CCGCACGAA	ATCGTGCCAAC	GAAAA	24-3	CACGA / UCGUG P8
14	14	3012227	61.7244	2383	CCGCACGAA*ATCGTGCCACC	CCGCACGAA	ATCGTGCCACC	GAAAA	24-3	CACGA / UCGUG P8
14	25	490345	10.0478	1306	CCGCACAAA*ATTGTGCCACC	CCGCACAAA	ATTGTGCCACC	AAAAA	11.3	CACAA / UUGUG P8
14	10	451507	9.25196	13529	CCGCACAAA*ATAGCGCCAAC	CCGCACAAA	ATAGCGCCAAC	AAAAA	wt
14	3	319827	6.55367	6665	CCGCACAAA*ATGGCTCGAAG	CCGCACAAA	ATGGCTCGAAG	AAAAA	11.2	many disruptions to P7 pairs, but no corresponding P8 pairing
14	12	121966	2.49924	2689	CCGCACTAA*ATAGTGCCAAC	CCGCACTAA	ATAGTGCCAAC	TAAAA	11.1	CACUA / UAGUG P8
14	15	100823	2.06599	14392	CCGCACGAA*ATCGTGCCAAC	CCGCACGAA	ATCGTGCCAAC	GAAAA	24-3	CACGA / UCGUG P8
14	42	80840	1.65652	1398	CCGCACGA*ATCGTGCCACC	CCGCACGA	ATCGTGCCACC	GAAA	24-3	CACGA / UCGUG P8
14	45	62402	1.2787	1032	CCGCACAAA*TGTGCCACC	CCGCACAAA	TGTGCCACC	AAAAA	14.1	CACA / UGUG P8 plus deletion in J7/8 loop
16	3	61098	41.0403	11	CCGCACGAA*ATCGTGCCACC	CCGCACGAA	ATCGTGCCACC	GAAAA	24-3	CACGA / UCGUG P8
16	42	47738	32.0663	13	CCGCACGA*ATCGTGCCACC	CCGCACGA	ATCGTGCCACC	GAAA	24-3	CACGA / UCGUG P8
16	73	22122	14.8596	13	CCGCACAAA*TGTGCCACC	CCGCACAAA	TGTGCCACC	AAAAA	14.1	CACA / UGUG P8 plus deletion in J7/8 loop
16	38	2485	1.66921	20	CCGCACAGA*ACTGTGCCACC	CCGCACAGA	ACTGTGCCACC	AGAAA	11.5	CACAG / CUGUG P8
16	66	2080	1.39716	12	CCGCACGA*ATCGTGCCATC	CCGCACGA	ATCGTGCCATC	GAAA	24-3	CACGA / UCGUG P8
18	21	10021143	51.7612	1345	CCGCACGA*ATCGTGCCACC	CCGCACGA	ATCGTGCCACC	GAAA	24-3	CACGA / UCGUG P8
18	0	3519016	18.1764	14223	CCGCACGAA*ATCGTGCCACC	CCGCACGAA	ATCGTGCCACC	GAAAA	24-3	CACGA / UCGUG P8
18	53	3142740	16.2329	3666	CCGCACAAA*TGTGCCACC	CCGCACAAA	TGTGCCACC	AAAAA	14.1	CACA / UGUG P8 plus deletion in J7/8 loop
18	25	422785	2.18377	2400	CCGCACGA*ATCGTGCCATC	CCGCACGA	ATCGTGCCATC	GAAA	24-3	CACGA / UCGUG P8
18	36	414659	2.1418	2494	CCGCACAA*ATTGTGCCAAC	CCGCACAA	ATTGTGCCAAC	AAAA	11.3	CACAA / UUGUG P8
18	20	413674	2.13671	3415	CCGCACGA*TTCGTGCCACC	CCGCACGA	TTCGTGCCACC	GAAA	18.1	CACGAA / UUCGUG P8 (count as new or as 24-3?)
18	26	199404	1.02996	1402	CCGCACTA*TTAGTGCCACC	CCGCACTA	TTAGTGCCACC	TAAA	18.2	CACUAA / UUAGUG P8 (count as new or as 11.1?)
18	30	198894	1.02733	1043	CCGCACGA*TTCGTGCCATC	CCGCACGA	TTCGTGCCATC	GAAA	18.1	CACGAA / UUCGUG P8 (count as new or as 24-3?)
21	11	8090352	58.4386	1742	CCGCACGAA*ATCGTGCCACC	CCGCACGAA	ATCGTGCCACC	GAAA	24-3	CACGA / UCGUG P8
21	33	2526121	18.2468	1035	CCGCACAAAA*TGTGCCACC	CCGCACAAAA	TGTGCCACC	AAAA	14.1	CACA / UGUG P8 plus deletion in J7/8 loop
21	0	2349897	16.9739	1757	CCGCACGAAA*ATCGTGCCACC	CCGCACGAAA	ATCGTGCCACC	GAAAA	24-3	CACGA / UCGUG P8
21	17	199196	1.43884	8300	CCGCACAAAA*ATGTGCCACC	CCGCACAAAA	ATGTGCCACC	AAAAA	14.1	CACA / UGUG P8 plus deletion in J7/8 loop
21	21	156390	1.12964	1362	CCGCACGAA*TTCGTGCCACC	CCGCACGAA	TTCGTGCCACC	GAAA	18.1	CACGAA / UUCGUG P8 (count as new or as 24-3?)
24	11	8.34584e+06	52.1936	1385	CCGCACGAA*ATCGTGCCACC	CCGCACGAA	ATCGTGCCACC	GAAA	24-3	CACGA / UCGUG P8
24	13	5011113	31.3387	2374	CCGCACAAAA*ATGTGCCACC	CCGCACAAAA	ATGTGCCACC	AAAAA	14.1	CACA / UGUG P8 plus deletion in J7/8 loop
24	0	1.28591e+06	8.04187	1887	CCGCACGAAA*ATCGTGCCACC	CCGCACGAAA	ATCGTGCCACC	GAAAA	24-3	CACGA / UCGUG P8
24	33	336959	2.10729	1184	CCGCACGAA*ATGTGCCACC	CCGCACGAA	ATGTGCCACC	GAAA	24.1	appears to be 5' 24-3 / 3' 14.1
24	4	325212	2.03383	1440	CCGCACAAAA*ATCGTGCCACC	CCGCACAAAA	ATCGTGCCACC	AAAAA	24.2	appears to be 5' 14.1 / 3' 24-3
24	36	178250	1.11475	4216	CCGCACAAAA*GTGCCACC	CCGCACAAAA	GTGCCACC	AAAAA	14.1	CACA / UGUG P8 plus deletion in J7/8 loop (note that inclusion or exclusion of "AT" on 3'-strand is an artifact of alignment, all 14.1 variants have the same sequence in this region).
27	6	12605620	53.9757	21375	CCGCACGAA*ATCGTGCCACC	CCGCACGAA	ATCGTGCCACC	GAAA	24-3
27	15	7252685	31.0551	17078	CCGCACAAAA*TGTGCCACC	CCGCACAAAA	TGTGCCACC	AAAAA	14.1
27	20	1.32986e+06	5.6943	17125	CCGCACGAA*TGTGCCACC	CCGCACGAA	TGTGCCACC	GAAA	24.1
27	4	487864	2.08897	20108	CCGCACTAA*TTAGTGCCACC	CCGCACTAA	TTAGTGCCACC	TAAA	18.2
27	0	375110	1.60617	55858	CCGCACAAAA*ATCGTGCCACC	CCGCACAAAA	ATCGTGCCACC	AAAAA	24.2
27	1	290701	1.24475	12610	CCGCACGAAA*ATCGTGCCACC	CCGCACGAAA	ATCGTGCCACC	GAAAA	24-3
27	10	263342	1.1276	64063	CCGCACGAA*TTCGTGCCACC	CCGCACGAA	TTCGTGCCACC	GAAA	18.1
28	18	33829289	54.4559	1191	CCGCACGAA*TATCGTGCCACC	CCGCACGAA	TATCGTGCCACC	GAAA	24-3	CACGA / UCGUG P8
28	28	11670137	18.7857	2663	CCGCACGAA*GATCGTGCCACC	CCGCACGAA	GATCGTGCCACC	GAAA	24-3	CACGA / UCGUG P8
28	100	5.30087e+06	8.53296	4988	CCGCACTAA*TTAGTGCCACC	CCGCACTAA	TTAGTGCCACC	TAAA	18.2	CACUAA / UUAGUG P8 (count as new or as 11.1?)
28	34	3470017	5.58578	2004	CCGCACGAA*AATCGTGCCACC	CCGCACGAA	AATCGTGCCACC	GAAA	24-3	CACGA / UCGUG P8
28	29	1796927	2.89256	1204	CCGCACGAA*GTTCGTGCCACC	CCGCACGAA	GTTCGTGCCACC	GAAA	18.1	CACGAA / UUCGUG P8 (count as new or as 24-3?)
28	114	1620967	2.60931	1412	CCGCACAAAA*TGTGCCACC	CCGCACAAAA	TGTGCCACC	AAAAA	14.1	CACA / UGUG P8 plus deletion in J7/8 loop
28	33	1387311	2.23319	1255	CCGCACGAA*CATCGTGCCACC	CCGCACGAA	CATCGTGCCACC	GAAA	24-3	CACGA / UCGUG P8
28	21	717027	1.15422	2882	CCGCACGAA*GTTCGTGCCATC	CCGCACGAA	GTTCGTGCCATC	GAAA	18.1	CACGAA / UUCGUG P8 (count as new or as 24-3?)

## Sheet: prevalent clusters (R31–52)
Supplementary file 2. Prevalent sequence clusters over the course of evolution
round	cluster #	reads	freq. (%)	representative	sequence	5´ sequence	3´ sequence	position 15+	cluster name	notes
31	13	127217	48.7515	10	CCGCACGAA*ATCGTGCCACC	CCGCACGAA	ATCGTGCCACC	GAAA	24-3	CACGA / UCGUG P8
31	9	46537	17.8337	29	CCGCACACA*AGTGTGCCACC	CCGCACACA	AGTGTGCCACC	ACAA	31.1	CACAC / GUGUG P8
31	4	31291	11.9912	14	CCGCACAA*ATTGTGCACCACC	CCGCACAA	ATTGTGCACCACC	AAA	38-6	GCACAA / UUGUGC P8
31	14	12527	4.80054	22	CCGCACGAA*TTCGTGCCACC	CCGCACGAA	TTCGTGCCACC	GAAA	18.1	CACGAA / UUCGUG P8 (count as new or as 24-3?)
31	21	10909	4.18049	28	CCGCACGGA*ACCGTGCCACC	CCGCACGGA	ACCGTGCCACC	GGAA	31.2	CACGG / CCGUG P8
31	8	9424	3.61142	26	CCGCACTAA*TTAGTGCCACC	CCGCACTAA	TTAGTGCCACC	TAAA	18.2	CACUAA / UUAGUG P8 (count as new or as 11.1?)
31	3	7121	2.72888	16	CCGCACGACA*GTCGTGCCAGC	CCGCACGACA	GTCGTGCCAGC	GACAA	31.3	CACGAC / GUCGUG P8
31	48	3758	1.44012	12	CCGCACGAA*ACC	CCGCACGAA	ACC	GAAA	31.4	this deletes nearly all of the P8/P7 region, leaving a 4nt hairpin: CGGU - GG - ACCG
31	15	3252	1.24622	15	CCGCACTAA*TTAGTGCCAAC	CCGCACTAA	TTAGTGCCAAC	TAAA	18.2	CACUAA / UUAGUG P8 (count as new or as 11.1?)
31	37	3057	1.17149	56	CCGCACGAA*TGCCACC	CCGCACGAA	TGCCACC	GAAA	31.5	similar to 31.4, hairpin is CGGUG-C-CACCG
34	31	31559942	46.1177	1346	CCGCACGACAA*GTCGTGCCAGC	CCGCACGACAA	GTCGTGCCAGC	GACAA	31.3	CACGAC / GUCGUG P8
34	5	30575823	44.6797	5253	CCGCACAAA*ATTGTGCACCACC	CCGCACAAA	ATTGTGCACCACC	AAA	38-6	GCACAA / UUGUGC P8
34	71	2396256	3.50159	6624	CCGCACGGAA*ACCGTGCCACC	CCGCACGGAA	ACCGTGCCACC	GGAA	31.2	CACGG / CCGUG P8
34	73	1.2448e+06	1.81899	10245	CCGCACACAA*AGTGTGCCACC	CCGCACACAA	AGTGTGCCACC	ACAA	31.1	CACAC / GUGUG P8
34	70	1069600	1.56298	1106	CCGCACGAAA*ATCGTGCCACC	CCGCACGAAA	ATCGTGCCACC	GAAA	24-3	CACGA / UCGUG P8
36	4	40237936	53.0669	1092	CCGCACGACA*GTCGTGCCAGC	CCGCACGACA	GTCGTGCCAGC	GACAA	31.3	CACGAC / GUCGUG P8
36	57	32342812	42.6546	2000	CCGCACAA*ATTGTGCACCACC	CCGCACAA	ATTGTGCACCACC	AAA	38-6	GCACAA / UUGUGC P8
36	103	1.29136e+06	1.70308	1667	CCGCACGGA*ACCGTGCCACC	CCGCACGGA	ACCGTGCCACC	GGAA	31.2	CACGG / CCGUG P8
38	38	12555107	49.9526	1067	CCGCACAA*ATTGTGCACCACC	CCGCACAA	ATTGTGCACCACC	AAA	38-6	GCACAA / UUGUGC P8
38	2	11823134	47.0404	5867	CCGCACGACA*GTCGTGCCAGC	CCGCACGACA	GTCGTGCCAGC	GACAA	31.3	CACGAC / GUCGUG P8
38	66	332826	1.32421	1002	CCGCACGGA*ACCGTGCCACC	CCGCACGGA	ACCGTGCCACC	GGAA	31.2	CACGG / CCGUG P8
43	8	2.60662e+06	43.5342	2255	CCGCACAA*ATTGTGCACCACC	CCGCACAA	ATTGTGCACCACC	AAA	38-6	GCACAA / UUGUGC P8
43	41	2.29158e+06	38.2726	6361	CCGCACACA*AGTGTGCCACC	CCGCACACA	AGTGTGCCACC	ACAA	31.1	CACAC / GUGUG P8
43	35	561242	9.37351	1108	CCGCACGGA*ACCGTGCCACC	CCGCACGGA	ACCGTGCCACC	GGAA	31.2	CACGG / CCGUG P8
43	0	194428	3.24721	1277	CCGCACGACA*GGTCGTGCCAGC	CCGCACGACA	GGTCGTGCCAGC	GACAA	31.3	CACGAC / GUCGUG P8
46	15	19821126	79.3779	1341	CCGCACAAA*ATTGTGCACCACC	CCGCACAAA	ATTGTGCACCACC	AAA	38-6	GCACAA / UUGUGC P8
46	6	1835340	7.35001	1200	CCGCACCAA*ATGGTGCACCACC	CCGCACCAA	ATGGTGCACCACC	CAA	52-2	GCACCA / UGGUGC P8
46	70	861349	3.44945	1225	CCGCACACAA*AGTGTGCCACC	CCGCACACAA	AGTGTGCCACC	ACAA	31.1	CACAC / GUGUG P8
46	14	644106	2.57946	3800	CCGCACTAA*ATAGTGCACCACC	CCGCACTAA	ATAGTGCACCACC	TAA	46.1	GCACUA / UAGUGC P8
49	0	6365762	75.5994	3025	CCGCACCAA*ATGGTGCACCACC	CCGCACCAA	ATGGTGCACCACC	CAA	52-2	GCACCA / UGGUGC P8
49	4	1.47615e+06	17.5307	1169	CCGCACCAA*ATGGTGCACCTCC	CCGCACCAA	ATGGTGCACCTCC	CAA	52-2	GCACCA / UGGUGC P8
49	1	312808	3.71489	1230	CCGCACCAA*ATGGTGCCCCACC	CCGCACCAA	ATGGTGCCCCACC	CAA	52-2	GCACCA / UGGUGC P8 (A90C mutation)
49	2	90542	1.07527	1052	CCGCACCAA*ATGGTGCTCCACC	CCGCACCAA	ATGGTGCTCCACC	CAA	52-2	GCACCA / UGGUGC P8 (A90U mutation)
52	0	2.89601e+07	80.7862	1218	CCGCACCAA*ATGGTGCACCACC	CCGCACCAA	ATGGTGCACCACC	CAA	52-2	GCACCA / UGGUGC P8
52	2	3423029	9.54877	2558	CCGCACCAA*ATGGTGCACCTCC	CCGCACCAA	ATGGTGCACCTCC	CAA	52-2	GCACCA / UGGUGC P8
52	4	1.2895e+06	3.59713	1205	CCGCACCAA*ATGGTGCCCCACC	CCGCACCAA	ATGGTGCCCCACC	CAA	52-2	GCACCA / UGGUGC P8 (A90C mutation)
52	5	609223	1.69947	1629	CCGCACCAA*ATGGTGCTCCACC	CCGCACCAA	ATGGTGCTCCACC	CAA	52-2	GCACCA / UGGUGC P8 (A90U mutation)
52	7	347754	0.970083	13736	CCGCACCAA*ATGGTGCACCACT	CCGCACCAA	ATGGTGCACCACT	CAA	52-2	GCACCA / UGGUGC P8

## Sheet: R6
Cluster 0				4907	0.0351173	Cluster % Total	Reads
0	23nt,	2122		0		100	13973155						1151		1151	CCGCACAAACCAGCGACAAC
1	23nt,	1749	+/100.00%	0		Cluster	Representation	Representative	Sequence	Alt Sequence 1	Alt Sequence 2	Alt Sequence 3	CCGCACAAACCAGCGACAAC		1172	CCGCACAGAATGGCGCCAAC
2	23nt,	1036	+/100.00%	0		0	0.0351173	2122	CCGCACAAAAAAATAGCGCCAAC				1172		1519	CCGCACAAAATAGCGCCAAC
Cluster 1				23331	0.16697	1	0.16697	7537	CCGCACAAAAAATAGCGCCAAC				CCGCACAGAATGGCGCCAAC		2775	CCGCACAAACAAGCGCCAAC
0	22nt,	7537		0		2	0.581222	1180	CCGCACAAAAATAGCGCCAAC				1519		1321	CCGCACAAAACAGCGCCAGC
1	22nt,	2392	+/100.00%	0		3	0.0361694	1101	CCGCACAAAATAGCGCCCAAC				CCGCACAAAATAGCGCCAAC		1316	CCGCACAAAATAGCGCGAAC
2	22nt,	6293	+/100.00%	0		4	0.0257995	1622	CCGCACCAAAATAGCGCCAAC				2775		1299	CCGCACAAAATAGTGCCACC
3	22nt,	3981	+/100.00%	0		5	0.00823722	1151	CCGCACAAACCAGCGACAAC	CCGCACAAAATAGCGCCGAC			CCGCACAAACAAGCGCCAAC		1070	CCGCACAAAAGAGCGCCAAC
4	22nt,	2033	+/100.00%	0		6	0.00838751	1172	CCGCACAGAATGGCGCCAAC				1321		1031	CCGCACAAATTAGCGCCAAC
5	22nt,	1095	+/100.00%	0		7	91.2004	1519	CCGCACAAAATAGCGCCAAC				CCGCACAAAACAGCGCCAGC		1187	CCGCACAAAGTAGCGCCAAC
Cluster 2				81215	0.581222	8	0.0465893	2775	CCGCACAAACAAGCGCCAAC				1316		3089	CCGCACAAACTAGCGCCAAC
0	21nt,	1180		0		9	0.00945384	1321	CCGCACAAAACAGCGCCAGC				CCGCACAAAATAGCGCGAAC		1190	CCGCACAAAAAAGCGCCAAC
1	21nt,	1676	+/100.00%	0		10	0.00941806	1316	CCGCACAAAATAGCGCGAAC				1299		2061	CCGCACAAAACAGCGCCAAC
2	21nt,	1486	+/100.00%	0		11	0.0092964	1299	CCGCACAAAATAGTGCCACC				CCGCACAAAATAGTGCCACC		1200	CCGCACAAAATTGCGCCAAC
3	21nt,	1284	+/100.00%	0		12	0.18187	1070	CCGCACAAAAGAGCGCCAAC				1070		1357	CCGCACAAAATCGCGCCAAC
4	21nt,	22746	+/100.00%	0		13	0.233276	1031	CCGCACAAATTAGCGCCAAC				CCGCACAAAAGAGCGCCAAC		2417	CCGCACAAAATGGCGCCAAC
5	21nt,	6679	+/100.00%	0		14	0.332588	1187	CCGCACAAAGTAGCGCCAAC				1031		1720	CCGCACAAAATAGCGCTAAC
6	21nt,	19824	+/100.00%	0		15	0.0546691	3089	CCGCACAAACTAGCGCCAAC				CCGCACAAATTAGCGCCAAC		1553	CCGCACAAAATAGCGTCAAC
7	21nt,	12611	+/100.00%	0		16	0.114727	1190	CCGCACAAAAAAGCGCCAAC				1187		1347	CCGCACAAAATAGTGCCAAC
8	21nt,	6871	+/100.00%	0		17	0.373173	2061	CCGCACAAAACAGCGCCAAC				CCGCACAAAGTAGCGCCAAC		1212	CCGCACAAAATATCGCCAAC
9	21nt,	3673	+/100.00%	0		18	0.193929	1200	CCGCACAAAATTGCGCCAAC				3089		1948	CCGCACAAAATAGCGCCATC
10	21nt,	2139	+/100.00%	0		19	0.115944	1357	CCGCACAAAATCGCGCCAAC				CCGCACAAACTAGCGCCAAC		2752	CCGCACAGAATAGCGCCAAC
11	21nt,	1046	+/100.00%	0		20	1.1585	2417	CCGCACAAAATGGCGCCAAC				1190		1365	CCGCACGAAATAGCGCCAAC
Cluster 3				5054	0.0361694	21	0.233462	1720	CCGCACAAAATAGCGCTAAC				CCGCACAAAAAAGCGCCAAC		1701	CCGCACAAATAGCGCCAAC
0	21nt,	1101		0		22	0.242894	1553	CCGCACAAAATAGCGTCAAC				2061		1180	CCGCACAAAAATAGCGCCAAC
1	21nt,	1744	+/100.00%	0		23	0.219449	1347	CCGCACAAAATAGTGCCAAC				CCGCACAAAACAGCGCCAAC		1132	CCGCACAACATAGCGCCAAC
2	21nt,	2209	+/100.00%	0		24	0.379005	1212	CCGCACAAAATATCGCCAAC				1200		1151	CCGCACAAAATAGCGCCGAC
Cluster 4				3605	0.0257995	25	0.259161	1948	CCGCACAAAATAGCGCCATC				CCGCACAAAATTGCGCCAAC		1001	CCGCACAAAATAGCGCCAGC
0	21nt,	1622		0		26	0.547564	2752	CCGCACAGAATAGCGCCAAC				1357		1509	CCGCACAAAATAGCCCCAAC
1	21nt,	1983	+/100.00%	0		27	0.333139	1365	CCGCACGAAATAGCGCCAAC				CCGCACAAAATCGCGCCAAC		1880	CCGCACAAAATAGCGACAAC
Cluster 5				1151	0.00823722	28	0.00810125	1132	CCGCACAACATAGCGCCAAC				2417		3156	CCGCACAAAATAGCGCCCAC
0	20nt,	1151		0		29	0.432887	1151	CCGCACAAACCAGCGACAAC	CCGCACAAAATAGCGCCGAC			CCGCACAAAATGGCGCCAAC		2996	CCGCACAAAATAGCACCAAC
Cluster 6				1172	0.00838751	30	0.616661	1001	CCGCACAAAATAGCGCCAGC				1720		2754	CCGCACAAAATAGCGCAAAC
0	20nt,	1172		0		31	0.0194587	1509	CCGCACAAAATAGCCCCAAC				CCGCACAAAATAGCGCTAAC		2722	CCGCACAAAATAGCTCCAAC
Cluster 7				12743568	91.2004	32	0.0245685	1880	CCGCACAAAATAGCGACAAC				1553		2130	CCGCACAAAATACCGCCAAC
0	20nt,	1519		0		33	0.0593996	3156	CCGCACAAAATAGCGCCCAC				CCGCACAAAATAGCGTCAAC		2286	CCGCACAAAATAGCGCCAAT
1	20nt,	1142	+/100.00%	0		34	0.0564368	2996	CCGCACAAAATAGCACCAAC				1347		2355	CCGCACAATATAGCGCCAAC
2	20nt,	1123	+/100.00%	0		35	0.056859	2754	CCGCACAAAATAGCGCAAAC				CCGCACAAAATAGTGCCAAC		1518	CCGCACAAAAAGCGCCAAC
3	20nt,	1122	+/100.00%	0		36	0.0434619	2722	CCGCACAAAATAGCTCCAAC				1212		4494	CCGCACAAAATAACGCCAAC
4	20nt,	1327	+/100.00%	0		37	0.0359761	2130	CCGCACAAAATACCGCCAAC				CCGCACAAAATATCGCCAAC		4432	CCGCACAAAATAGCGCCTAC
5	20nt,	1016	+/100.00%	0		38	0.0399981	2286	CCGCACAAAATAGCGCCAAT				1948		1705	CCGCACAAAATGCGCCAAC
6	20nt,	1885	+/100.00%	0		39	0.0415869	2355	CCGCACAATATAGCGCCAAC				CCGCACAAAATAGCGCCATC		5842	CCGCACAAGATAGCGCCAAC
7	20nt,	1329	+/100.00%	0		40	0.0965637	4494	CCGCACAAAATAACGCCAAC				2752		1013	CCGCACAAATGGCGCCAAC
8	20nt,	1169	+/100.00%	0		41	0.0939158	4432	CCGCACAAAATAGCGCCTAC				CCGCACAGAATAGCGCCAAC		3618	CCGCACACAATAGCGCCAAC
9	20nt,	1053	+/100.00%	0		42	0.145286	5842	CCGCACAAGATAGCGCCAAC				1365		2335	CCGCACATAATAGCGCCAAC
10	20nt,	1046	+/100.00%	0		43	0.0845335	3618	CCGCACACAATAGCGCCAAC				CCGCACGAAATAGCGCCAAC		3923	CCGCACAATAGCGCCAAC
11	20nt,	1020	+/100.00%	0		44	0.0421022	2335	CCGCACATAATAGCGCCAAC				1701		4251	CCGCACTAAATAGCGCCAAC
12	20nt,	1120	+/100.00%	0		45	0.0950752	4251	CCGCACTAAATAGCGCCAAC				CCGCACAAATAGCGCCAAC		3685	CCGCACCAAATAGCGCCAAC
13	20nt,	1006	+/100.00%	0		46	0.0800964	3685	CCGCACCAAATAGCGCCAAC				1180		1101	CCGCACAAAATAGCGCCCAAC
14	20nt,	1228	+/100.00%	0		47	0.661841	1701	CCGCACAAATAGCGCCAAC				CCGCACAAAAATAGCGCCAAC		1622	CCGCACCAAAATAGCGCCAAC
15	20nt,	1026	+/100.00%	0		48	0.0208972	1518	CCGCACAAAAAGCGCCAAC				1132		7537	CCGCACAAAAAATAGCGCCAAC
16	20nt,	1417	+/100.00%	0		49	0.0322547	1705	CCGCACAAAATGCGCCAAC				CCGCACAACATAGCGCCAAC		2122	CCGCACAAAAAAATAGCGCCAAC
17	20nt,	1170	+/100.00%	0		50	0.00724962	1013	CCGCACAAATGGCGCCAAC				1151			end
18	20nt,	1108	+/100.00%	0		51	0.0944168	3923	CCGCACAATAGCGCCAAC				CCGCACAAAATAGCGCCGAC
19	20nt,	1053	+/100.00%	0		52	0	#N/A	#N/A				1001
20	20nt,	1416	+/100.00%	0		53	#N/A	#N/A	#N/A				CCGCACAAAATAGCGCCAGC
21	20nt,	1204	+/100.00%	0		54	#N/A	#N/A	#N/A				1509
22	20nt,	1092	+/100.00%	0		55	#N/A	#N/A	#N/A				CCGCACAAAATAGCCCCAAC
23	20nt,	1045	+/100.00%	0		56	#N/A	#N/A	#N/A				1880
24	20nt,	1263	+/100.00%	0		57	#N/A	#N/A	#N/A				CCGCACAAAATAGCGACAAC
25	20nt,	1173	+/100.00%	0		58	#N/A	#N/A	#N/A				3156
26	20nt,	2341	+/100.00%	0		59	#N/A	#N/A	#N/A				CCGCACAAAATAGCGCCCAC
27	20nt,	2271	+/100.00%	0		60	#N/A	#N/A	#N/A				2996
28	20nt,	1740	+/100.00%	0		61	#N/A	#N/A	#N/A				CCGCACAAAATAGCACCAAC
29	20nt,	3015	+/100.00%	0		62	#N/A	#N/A	#N/A				2754
30	20nt,	2575	+/100.00%	0		63	#N/A	#N/A	#N/A				CCGCACAAAATAGCGCAAAC
31	20nt,	1684	+/100.00%	0		64	#N/A	#N/A	#N/A				2722
32	20nt,	2962	+/100.00%	0		65	#N/A	#N/A	#N/A				CCGCACAAAATAGCTCCAAC
33	20nt,	2682	+/100.00%	0		66	#N/A	#N/A	#N/A				2130
34	20nt,	1770	+/100.00%	0		67	#N/A	#N/A	#N/A				CCGCACAAAATACCGCCAAC
35	20nt,	1810	+/100.00%	0		68	#N/A	#N/A	#N/A				2286
36	20nt,	1658	+/100.00%	0		69	#N/A	#N/A	#N/A				CCGCACAAAATAGCGCCAAT
37	20nt,	1095	+/100.00%	0		70	#N/A	#N/A	#N/A				2355
38	20nt,	3113	+/100.00%	0		71	#N/A	#N/A	#N/A				CCGCACAATATAGCGCCAAC
39	20nt,	2774	+/100.00%	0		72	#N/A	#N/A	#N/A				1518
40	20nt,	1848	+/100.00%	0		73	#N/A	#N/A	#N/A				CCGCACAAAAAGCGCCAAC
41	20nt,	1003	+/100.00%	0		74	#N/A	#N/A	#N/A				4494
42	20nt,	1692	+/100.00%	0		75	#N/A	#N/A	#N/A				CCGCACAAAATAACGCCAAC
43	20nt,	1617	+/100.00%	0		76	#N/A	#N/A	#N/A				4432
44	20nt,	1256	+/100.00%	0		77	#N/A	#N/A	#N/A				CCGCACAAAATAGCGCCTAC
45	20nt,	1187	+/100.00%	0		78	#N/A	#N/A	#N/A				1705
46	20nt,	5257	+/100.00%	0		79	#N/A	#N/A	#N/A				CCGCACAAAATGCGCCAAC
47	20nt,	3379	+/100.00%	0		80	#N/A	#N/A	#N/A				5842
48	20nt,	2734	+/100.00%	0		81	#N/A	#N/A	#N/A				CCGCACAAGATAGCGCCAAC
49	20nt,	1441	+/100.00%	0		82	#N/A	#N/A	#N/A				1013
50	20nt,	7276	+/100.00%	0		83	#N/A	#N/A	#N/A				CCGCACAAATGGCGCCAAC
51	20nt,	4315	+/100.00%	0		84	#N/A	#N/A	#N/A				3618
52	20nt,	4035	+/100.00%	0		85	#N/A	#N/A	#N/A				CCGCACACAATAGCGCCAAC
53	20nt,	1774	+/100.00%	0		86	#N/A	#N/A	#N/A				2335
54	20nt,	1661	+/100.00%	0		87	#N/A	#N/A	#N/A				CCGCACATAATAGCGCCAAC
55	20nt,	1159	+/100.00%	0		88	#N/A	#N/A	#N/A				3923
56	20nt,	1693	+/100.00%	0		89	#N/A	#N/A	#N/A				CCGCACAATAGCGCCAAC
57	20nt,	1112	+/100.00%	0		90	#N/A	#N/A	#N/A				4251
58	20nt,	1345	+/100.00%	0		91	#N/A	#N/A	#N/A				CCGCACTAAATAGCGCCAAC
59	20nt,	1003	+/100.00%	0		92	#N/A	#N/A	#N/A				3685
60	20nt,	2027	+/100.00%	0		93	#N/A	#N/A	#N/A				CCGCACCAAATAGCGCCAAC
61	20nt,	1423	+/100.00%	0		94	#N/A	#N/A	#N/A				1101
62	20nt,	1133	+/100.00%	0		95	#N/A	#N/A	#N/A				CCGCACAAAATAGCGCCCAAC
63	20nt,	2494	+/100.00%	0		96	#N/A	#N/A	#N/A				1622
64	20nt,	1673	+/100.00%	0		97	#N/A	#N/A	#N/A				CCGCACCAAAATAGCGCCAAC
65	20nt,	1452	+/100.00%	0		98	#N/A	#N/A	#N/A				7537
66	20nt,	1845	+/100.00%	0		99	#N/A	#N/A	#N/A				CCGCACAAAAAATAGCGCCAAC
67	20nt,	1160	+/100.00%	0		100	#N/A	#N/A	#N/A				2122
68	20nt,	1036	+/100.00%	0		101	#N/A	#N/A	#N/A				CCGCACAAAAAAATAGCGCCAAC
69	20nt,	2721	+/100.00%	0		102	#N/A	#N/A	#N/A				end
70	20nt,	1766	+/100.00%	0		103	#N/A	#N/A	#N/A
71	20nt,	1614	+/100.00%	0		104	#N/A	#N/A	#N/A
72	20nt,	2017	+/100.00%	0		105	#N/A	#N/A	#N/A
73	20nt,	1347	+/100.00%	0		106	#N/A	#N/A	#N/A
74	20nt,	1153	+/100.00%	0		107	#N/A	#N/A	#N/A
75	20nt,	2264	+/100.00%	0		108	#N/A	#N/A	#N/A
76	20nt,	1493	+/100.00%	0		109	#N/A	#N/A	#N/A
77	20nt,	1343	+/100.00%	0		110	#N/A	#N/A	#N/A
78	20nt,	1252	+/100.00%	0		111	#N/A	#N/A	#N/A
79	20nt,	1398	+/100.00%	0		112	#N/A	#N/A	#N/A
80	20nt,	1625	+/100.00%	0		113	#N/A	#N/A	#N/A
81	20nt,	1606	+/100.00%	0		114	#N/A	#N/A	#N/A
82	20nt,	1265	+/100.00%	0		115	#N/A	#N/A	#N/A
83	20nt,	5970	+/100.00%	0		116	#N/A	#N/A	#N/A
84	20nt,	5199	+/100.00%	0		117	#N/A	#N/A	#N/A
85	20nt,	3343	+/100.00%	0		118	#N/A	#N/A	#N/A
86	20nt,	1974	+/100.00%	0		119	#N/A	#N/A	#N/A
87	20nt,	1915	+/100.00%	0		120	#N/A	#N/A	#N/A
88	20nt,	1110	+/100.00%	0		121	#N/A	#N/A	#N/A
89	20nt,	1103	+/100.00%	0		122	#N/A	#N/A	#N/A
90	20nt,	20751	+/100.00%	0		123	#N/A	#N/A	#N/A
91	20nt,	17218	+/100.00%	0		124	#N/A	#N/A	#N/A
92	20nt,	10869	+/100.00%	0		125	#N/A	#N/A	#N/A
93	20nt,	6660	+/100.00%	0		126	#N/A	#N/A	#N/A
94	20nt,	6048	+/100.00%	0		127	#N/A	#N/A	#N/A
95	20nt,	3108	+/100.00%	0		128	#N/A	#N/A	#N/A
96	20nt,	1868	+/100.00%	0		129	#N/A	#N/A	#N/A
97	20nt,	1549	+/100.00%	0		130	#N/A	#N/A	#N/A
98	20nt,	1274	+/100.00%	0		131	#N/A	#N/A	#N/A
99	20nt,	3485	+/100.00%	0		132	#N/A	#N/A	#N/A
100	20nt,	2353	+/100.00%	0		133	#N/A	#N/A	#N/A
101	20nt,	1896	+/100.00%	0		134	#N/A	#N/A	#N/A
102	20nt,	1262	+/100.00%	0		135	#N/A	#N/A	#N/A
103	20nt,	2636	+/100.00%	0		136	#N/A	#N/A	#N/A
104	20nt,	1910	+/100.00%	0		137	#N/A	#N/A	#N/A
105	20nt,	1356	+/100.00%	0		138	#N/A	#N/A	#N/A
106	20nt,	1100	+/100.00%	0		139	#N/A	#N/A	#N/A
107	20nt,	2212	+/100.00%	0		140	#N/A	#N/A	#N/A
108	20nt,	1628	+/100.00%	0		141	#N/A	#N/A	#N/A
109	20nt,	1761	+/100.00%	0		142	#N/A	#N/A	#N/A
110	20nt,	1586	+/100.00%	0		143	#N/A	#N/A	#N/A
111	20nt,	1098	+/100.00%	0		144	#N/A	#N/A	#N/A
112	20nt,	1155	+/100.00%	0		145	#N/A	#N/A	#N/A
113	20nt,	16692	+/100.00%	0		146	#N/A	#N/A	#N/A
114	20nt,	14363	+/100.00%	0		147	#N/A	#N/A	#N/A
115	20nt,	9734	+/100.00%	0		148	#N/A	#N/A	#N/A
116	20nt,	5514	+/100.00%	0		149	#N/A	#N/A	#N/A
117	20nt,	5071	+/100.00%	0		150	#N/A	#N/A	#N/A
118	20nt,	3093	+/100.00%	0		151	#N/A	#N/A	#N/A
119	20nt,	2043	+/100.00%	0		152	#N/A	#N/A	#N/A
120	20nt,	1681	+/100.00%	0		153	#N/A	#N/A	#N/A
121	20nt,	1531	+/100.00%	0		154	#N/A	#N/A	#N/A
122	20nt,	1354	+/100.00%	0		155	#N/A	#N/A	#N/A
123	20nt,	1179	+/100.00%	0		156	#N/A	#N/A	#N/A
124	20nt,	1238	+/100.00%	0		157	#N/A	#N/A	#N/A
125	20nt,	1610	+/100.00%	0		158	#N/A	#N/A	#N/A
126	20nt,	1162	+/100.00%	0		159	#N/A	#N/A	#N/A
127	20nt,	1034	+/100.00%	0		160	#N/A	#N/A	#N/A
128	20nt,	1282	+/100.00%	0		161	#N/A	#N/A	#N/A
129	20nt,	11593	+/100.00%	0		162	#N/A	#N/A	#N/A
130	20nt,	9837	+/100.00%	0		163	#N/A	#N/A	#N/A
131	20nt,	6448	+/100.00%	0		164	#N/A	#N/A	#N/A
132	20nt,	3732	+/100.00%	0		165	#N/A	#N/A	#N/A
133	20nt,	3420	+/100.00%	0		166	#N/A	#N/A	#N/A
134	20nt,	2147	+/100.00%	0		167	#N/A	#N/A	#N/A
135	20nt,	1396	+/100.00%	0		168	#N/A	#N/A	#N/A
136	20nt,	1960	+/100.00%	0		169	#N/A	#N/A	#N/A
137	20nt,	1863	+/100.00%	0		170	#N/A	#N/A	#N/A
138	20nt,	1037	+/100.00%	0		171	#N/A	#N/A	#N/A
139	20nt,	1465	+/100.00%	0		172	#N/A	#N/A	#N/A
140	20nt,	1301	+/100.00%	0		173	#N/A	#N/A	#N/A
141	20nt,	1142	+/100.00%	0		174	#N/A	#N/A	#N/A
142	20nt,	1103	+/100.00%	0		175	#N/A	#N/A	#N/A
143	20nt,	1562	+/100.00%	0		176	#N/A	#N/A	#N/A
144	20nt,	1253	+/100.00%	0		177	#N/A	#N/A	#N/A
145	20nt,	2669	+/100.00%	0		178	#N/A	#N/A	#N/A
146	20nt,	1784	+/100.00%	0		179	#N/A	#N/A	#N/A
147	20nt,	1610	+/100.00%	0		180	#N/A	#N/A	#N/A
148	20nt,	1226	+/100.00%	0		181	#N/A	#N/A	#N/A
149	20nt,	1216	+/100.00%	0		182	#N/A	#N/A	#N/A
150	20nt,	1163	+/100.00%	0		183	#N/A	#N/A	#N/A
151	20nt,	1540	+/100.00%	0		184	#N/A	#N/A	#N/A
152	20nt,	10898	+/100.00%	0		185	#N/A	#N/A	#N/A
153	20nt,	6880	+/100.00%	0		186	#N/A	#N/A	#N/A
154	20nt,	6575	+/100.00%	0		187	#N/A	#N/A	#N/A
155	20nt,	3381	+/100.00%	0		188	#N/A	#N/A	#N/A
156	20nt,	1446	+/100.00%	0		189	#N/A	#N/A	#N/A
157	20nt,	1795	+/100.00%	0		190	#N/A	#N/A	#N/A
158	20nt,	1504	+/100.00%	0		191	#N/A	#N/A	#N/A
159	20nt,	1338	+/100.00%	0		192	#N/A	#N/A	#N/A
160	20nt,	4788	+/100.00%	0		193	#N/A	#N/A	#N/A
161	20nt,	3367	+/100.00%	0		194	#N/A	#N/A	#N/A
162	20nt,	3148	+/100.00%	0		195	#N/A	#N/A	#N/A
163	20nt,	1906	+/100.00%	0		196	#N/A	#N/A	#N/A
164	20nt,	1029	+/100.00%	0		197	#N/A	#N/A	#N/A
165	20nt,	1251	+/100.00%	0		198	#N/A	#N/A	#N/A
166	20nt,	1943	+/100.00%	0		199	#N/A	#N/A	#N/A
167	20nt,	1431	+/100.00%	0		200	#N/A	#N/A	#N/A
168	20nt,	3220	+/100.00%	0
169	20nt,	6380	+/100.00%	0
170	20nt,	10490	+/100.00%	0
171	20nt,	17252	+/100.00%	0
172	20nt,	18477	+/100.00%	0
173	20nt,	31315	+/100.00%	0
174	20nt,	46569	+/100.00%	0
175	20nt,	57152	+/100.00%	0
176	20nt,	8429	+/100.00%	0
177	20nt,	7510	+/100.00%	0
178	20nt,	5234	+/100.00%	0
179	20nt,	2565	+/100.00%	0
180	20nt,	1573	+/100.00%	0
181	20nt,	1246	+/100.00%	0
182	20nt,	1124	+/100.00%	0
183	20nt,	1011	+/100.00%	0
184	20nt,	1687	+/100.00%	0
185	20nt,	1453	+/100.00%	0
186	20nt,	1047	+/100.00%	0
187	20nt,	1366	+/100.00%	0
188	20nt,	13227	+/100.00%	0
189	20nt,	11815	+/100.00%	0
190	20nt,	7780	+/100.00%	0
191	20nt,	4352	+/100.00%	0
192	20nt,	4026	+/100.00%	0
193	20nt,	2389	+/100.00%	0
194	20nt,	1548	+/100.00%	0
195	20nt,	1082	+/100.00%	0
196	20nt,	1011	+/100.00%	0
197	20nt,	1125	+/100.00%	0
198	20nt,	1122	+/100.00%	0
199	20nt,	5906	+/100.00%	0
200	20nt,	5795	+/100.00%	0
201	20nt,	4558	+/100.00%	0
202	20nt,	2657	+/100.00%	0
203	20nt,	1770	+/100.00%	0
204	20nt,	1719	+/100.00%	0
205	20nt,	1196	+/100.00%	0
206	20nt,	1082	+/100.00%	0
207	20nt,	13344	+/100.00%	0
208	20nt,	13205	+/100.00%	0
209	20nt,	9626	+/100.00%	0
210	20nt,	5644	+/100.00%	0
211	20nt,	3935	+/100.00%	0
212	20nt,	3445	+/100.00%	0
213	20nt,	2154	+/100.00%	0
214	20nt,	1149	+/100.00%	0
215	20nt,	1489	+/100.00%	0
216	20nt,	1225	+/100.00%	0
217	20nt,	1816	+/100.00%	0
218	20nt,	3187	+/100.00%	0
219	20nt,	2093	+/100.00%	0
220	20nt,	2636	+/100.00%	0
221	20nt,	2784	+/100.00%	0
222	20nt,	3397	+/100.00%	0
223	20nt,	1674	+/100.00%	0
224	20nt,	1233	+/100.00%	0
225	20nt,	1591	+/100.00%	0
226	20nt,	1450	+/100.00%	0
227	20nt,	1226	+/100.00%	0
228	20nt,	1244	+/100.00%	0
229	20nt,	1636	+/100.00%	0
230	20nt,	1163	+/100.00%	0
231	20nt,	1115	+/100.00%	0
232	20nt,	1258	+/100.00%	0
233	20nt,	1300	+/100.00%	0
234	20nt,	1279	+/100.00%	0
235	20nt,	1259	+/100.00%	0
236	20nt,	1220	+/100.00%	0
237	20nt,	1198	+/100.00%	0
238	20nt,	1101	+/100.00%	0
239	20nt,	1096	+/100.00%	0
240	20nt,	1012	+/100.00%	0
241	20nt,	1988	+/100.00%	0
242	20nt,	1171	+/100.00%	0
243	20nt,	1170	+/100.00%	0
244	20nt,	3355	+/100.00%	0
245	20nt,	2057	+/100.00%	0
246	20nt,	2027	+/100.00%	0
247	20nt,	2597	+/100.00%	0
248	20nt,	1795	+/100.00%	0
249	20nt,	1483	+/100.00%	0
250	20nt,	2377	+/100.00%	0
251	20nt,	1672	+/100.00%	0
252	20nt,	1325	+/100.00%	0
253	20nt,	2168	+/100.00%	0
254	20nt,	1405	+/100.00%	0
255	20nt,	1299	+/100.00%	0
256	20nt,	1931	+/100.00%	0
257	20nt,	1214	+/100.00%	0
258	20nt,	1110	+/100.00%	0
259	20nt,	1719	+/100.00%	0
260	20nt,	1128	+/100.00%	0
261	20nt,	1015	+/100.00%	0
262	20nt,	1989	+/100.00%	0
263	20nt,	1214	+/100.00%	0
264	20nt,	1188	+/100.00%	0
265	20nt,	1971	+/100.00%	0
266	20nt,	1257	+/100.00%	0
267	20nt,	1150	+/100.00%	0
268	20nt,	1859	+/100.00%	0
269	20nt,	1385	+/100.00%	0
270	20nt,	1724	+/100.00%	0
271	20nt,	1171	+/100.00%	0
272	20nt,	1707	+/100.00%	0
273	20nt,	1146	+/100.00%	0
274	20nt,	1644	+/100.00%	0
275	20nt,	1012	+/100.00%	0
276	20nt,	1643	+/100.00%	0
277	20nt,	1120	+/100.00%	0
278	20nt,	1549	+/100.00%	0
279	20nt,	1139	+/100.00%	0
280	20nt,	1466	+/100.00%	0
281	20nt,	1100	+/100.00%	0
282	20nt,	1681	+/100.00%	0
283	20nt,	3805	+/100.00%	0
284	20nt,	3077	+/100.00%	0
285	20nt,	1699	+/100.00%	0
286	20nt,	1295	+/100.00%	0
287	20nt,	1560	+/100.00%	0
288	20nt,	1535	+/100.00%	0
289	20nt,	1130	+/100.00%	0
290	20nt,	7483	+/100.00%	0
291	20nt,	4615	+/100.00%	0
292	20nt,	4023	+/100.00%	0
293	20nt,	1882	+/100.00%	0
294	20nt,	2787	+/100.00%	0
295	20nt,	1998	+/100.00%	0
296	20nt,	1757	+/100.00%	0
297	20nt,	1095	+/100.00%	0
298	20nt,	1772	+/100.00%	0
299	20nt,	1620	+/100.00%	0
300	20nt,	1033	+/100.00%	0
301	20nt,	1948	+/100.00%	0
302	20nt,	1883	+/100.00%	0
303	20nt,	1401	+/100.00%	0
304	20nt,	5916	+/100.00%	0
305	20nt,	4405	+/100.00%	0
306	20nt,	3150	+/100.00%	0
307	20nt,	2616	+/100.00%	0
308	20nt,	1198	+/100.00%	0
309	20nt,	4697	+/100.00%	0
310	20nt,	4618	+/100.00%	0
311	20nt,	3686	+/100.00%	0
312	20nt,	2343	+/100.00%	0
313	20nt,	2266	+/100.00%	0
314	20nt,	1132	+/100.00%	0
315	20nt,	3557	+/100.00%	0
316	20nt,	3228	+/100.00%	0
317	20nt,	2427	+/100.00%	0
318	20nt,	2272	+/100.00%	0
319	20nt,	1175	+/100.00%	0
320	20nt,	1916	+/100.00%	0
321	20nt,	1703	+/100.00%	0
322	20nt,	1259	+/100.00%	0
323	20nt,	1100	+/100.00%	0
324	20nt,	5682	+/100.00%	0
325	20nt,	1104	+/100.00%	0
326	20nt,	1692	+/100.00%	0
327	20nt,	1213	+/100.00%	0
328	20nt,	1128	+/100.00%	0
329	20nt,	2539	+/100.00%	0
330	20nt,	5515	+/100.00%	0
331	20nt,	10112	+/100.00%	0
332	20nt,	24143	+/100.00%	0
333	20nt,	52497	+/100.00%	0
334	20nt,	72549	+/100.00%	0
335	20nt,	95958	+/100.00%	0
336	20nt,	134199	+/100.00%	0
337	20nt,	2101	+/100.00%	0
338	20nt,	2463	+/100.00%	0
339	20nt,	1232	+/100.00%	0
340	20nt,	1399	+/100.00%	0
341	20nt,	9301	+/100.00%	0
342	20nt,	9232	+/100.00%	0
343	20nt,	5924	+/100.00%	0
344	20nt,	2856	+/100.00%	0
345	20nt,	2462	+/100.00%	0
346	20nt,	1791	+/100.00%	0
347	20nt,	1302	+/100.00%	0
348	20nt,	1093	+/100.00%	0
349	20nt,	3970	+/100.00%	0
350	20nt,	2889	+/100.00%	0
351	20nt,	2257	+/100.00%	0
352	20nt,	1637	+/100.00%	0
353	20nt,	5701	+/100.00%	0
354	20nt,	5182	+/100.00%	0
355	20nt,	3759	+/100.00%	0
356	20nt,	2279	+/100.00%	0
357	20nt,	1732	+/100.00%	0
358	20nt,	1359	+/100.00%	0
359	20nt,	1381	+/100.00%	0
360	20nt,	14496	+/100.00%	0
361	20nt,	12611	+/100.00%	0
362	20nt,	8247	+/100.00%	0
363	20nt,	4607	+/100.00%	0
364	20nt,	4408	+/100.00%	0
365	20nt,	2412	+/100.00%	0
366	20nt,	1506	+/100.00%	0
367	20nt,	2017	+/100.00%	0
368	20nt,	1746	+/100.00%	0
369	20nt,	1019	+/100.00%	0
370	20nt,	1558	+/100.00%	0
371	20nt,	1242	+/100.00%	0
372	20nt,	3713	+/100.00%	0
373	20nt,	3936	+/100.00%	0
374	20nt,	3116	+/100.00%	0
375	20nt,	1022	+/100.00%	0
376	20nt,	1201	+/100.00%	0
377	20nt,	1275	+/100.00%	0
378	20nt,	1068	+/100.00%	0
379	20nt,	9998	+/100.00%	0
380	20nt,	7986	+/100.00%	0
381	20nt,	4874	+/100.00%	0
382	20nt,	3572	+/100.00%	0
383	20nt,	2435	+/100.00%	0
384	20nt,	1288	+/100.00%	0
385	20nt,	1098	+/100.00%	0
386	20nt,	6753	+/100.00%	0
387	20nt,	5897	+/100.00%	0
388	20nt,	4004	+/100.00%	0
389	20nt,	2241	+/100.00%	0
390	20nt,	2115	+/100.00%	0
391	20nt,	1250	+/100.00%	0
392	20nt,	1054	+/100.00%	0
393	20nt,	2848	+/100.00%	0
394	20nt,	2734	+/100.00%	0
395	20nt,	2177	+/100.00%	0
396	20nt,	1468	+/100.00%	0
397	20nt,	7211	+/100.00%	0
398	20nt,	7006	+/100.00%	0
399	20nt,	5046	+/100.00%	0
400	20nt,	3077	+/100.00%	0
401	20nt,	2208	+/100.00%	0
402	20nt,	1828	+/100.00%	0
403	20nt,	1154	+/100.00%	0
404	20nt,	1388	+/100.00%	0
405	20nt,	1184	+/100.00%	0
406	20nt,	1164	+/100.00%	0
407	20nt,	1166	+/100.00%	0
408	20nt,	1356	+/100.00%	0
409	20nt,	1054	+/100.00%	0
410	20nt,	1007	+/100.00%	0
411	20nt,	1212	+/100.00%	0
412	20nt,	1242	+/100.00%	0
413	20nt,	1195	+/100.00%	0
414	20nt,	1097	+/100.00%	0
415	20nt,	1062	+/100.00%	0
416	20nt,	1046	+/100.00%	0
417	20nt,	1308	+/100.00%	0
418	20nt,	1041	+/100.00%	0
419	20nt,	1119	+/100.00%	0
420	20nt,	1291	+/100.00%	0
421	20nt,	1106	+/100.00%	0
422	20nt,	1376	+/100.00%	0
423	20nt,	1373	+/100.00%	0
424	20nt,	1328	+/100.00%	0
425	20nt,	1265	+/100.00%	0
426	20nt,	1196	+/100.00%	0
427	20nt,	1081	+/100.00%	0
428	20nt,	1067	+/100.00%	0
429	20nt,	1317	+/100.00%	0
430	20nt,	1212	+/100.00%	0
431	20nt,	1121	+/100.00%	0
432	20nt,	1074	+/100.00%	0
433	20nt,	1028	+/100.00%	0
434	20nt,	1003	+/100.00%	0
435	20nt,	1067	+/100.00%	0
436	20nt,	1061	+/100.00%	0
437	20nt,	1059	+/100.00%	0
438	20nt,	1048	+/100.00%	0
439	20nt,	1451	+/100.00%	0
440	20nt,	20202	+/100.00%	0
441	20nt,	16318	+/100.00%	0
442	20nt,	12417	+/100.00%	0
443	20nt,	7181	+/100.00%	0
444	20nt,	4174	+/100.00%	0
445	20nt,	4049	+/100.00%	0
446	20nt,	2598	+/100.00%	0
447	20nt,	1426	+/100.00%	0
448	20nt,	2089	+/100.00%	0
449	20nt,	3596	+/100.00%	0
450	20nt,	2366	+/100.00%	0
451	20nt,	1097	+/100.00%	0
452	20nt,	1756	+/100.00%	0
453	20nt,	1065	+/100.00%	0
454	20nt,	1034	+/100.00%	0
455	20nt,	1108	+/100.00%	0
456	20nt,	13864	+/100.00%	0
457	20nt,	12305	+/100.00%	0
458	20nt,	8436	+/100.00%	0
459	20nt,	4780	+/100.00%	0
460	20nt,	4075	+/100.00%	0
461	20nt,	2798	+/100.00%	0
462	20nt,	1698	+/100.00%	0
463	20nt,	1544	+/100.00%	0
464	20nt,	1167	+/100.00%	0
465	20nt,	1069	+/100.00%	0
466	20nt,	13051	+/100.00%	0
467	20nt,	12887	+/100.00%	0
468	20nt,	9195	+/100.00%	0
469	20nt,	5389	+/100.00%	0
470	20nt,	3830	+/100.00%	0
471	20nt,	3093	+/100.00%	0
472	20nt,	1907	+/100.00%	0
473	20nt,	1052	+/100.00%	0
474	20nt,	1614	+/100.00%	0
475	20nt,	1316	+/100.00%	0
476	20nt,	2021	+/100.00%	0
477	20nt,	1626	+/100.00%	0
478	20nt,	1406	+/100.00%	0
479	20nt,	1172	+/100.00%	0
480	20nt,	1998	+/100.00%	0
481	20nt,	1628	+/100.00%	0
482	20nt,	1572	+/100.00%	0
483	20nt,	1479	+/100.00%	0
484	20nt,	1150	+/100.00%	0
485	20nt,	1027	+/100.00%	0
486	20nt,	1101	+/100.00%	0
487	20nt,	1030	+/100.00%	0
488	20nt,	1590	+/100.00%	0
489	20nt,	1326	+/100.00%	0
490	20nt,	1313	+/100.00%	0
491	20nt,	1037	+/100.00%	0
492	20nt,	1286	+/100.00%	0
493	20nt,	1195	+/100.00%	0
494	20nt,	1356	+/100.00%	0
495	20nt,	1344	+/100.00%	0
496	20nt,	1275	+/100.00%	0
497	20nt,	1208	+/100.00%	0
498	20nt,	1324	+/100.00%	0
499	20nt,	1165	+/100.00%	0
500	20nt,	1133	+/100.00%	0
501	20nt,	1011	+/100.00%	0
502	20nt,	1329	+/100.00%	0
503	20nt,	1247	+/100.00%	0
504	20nt,	1139	+/100.00%	0
505	20nt,	1084	+/100.00%	0
506	20nt,	1608	+/100.00%	0
507	20nt,	1163	+/100.00%	0
508	20nt,	1119	+/100.00%	0
509	20nt,	1098	+/100.00%	0
510	20nt,	1387	+/100.00%	0
511	20nt,	1337	+/100.00%	0
512	20nt,	1923	+/100.00%	0
513	20nt,	1413	+/100.00%	0
514	20nt,	1590	+/100.00%	0
515	20nt,	1441	+/100.00%	0
516	20nt,	1201	+/100.00%	0
517	20nt,	1024	+/100.00%	0
518	20nt,	1173	+/100.00%	0
519	20nt,	1132	+/100.00%	0
520	20nt,	1222	+/100.00%	0
521	20nt,	1067	+/100.00%	0
522	20nt,	1308	+/100.00%	0
523	20nt,	1287	+/100.00%	0
524	20nt,	1421	+/100.00%	0
525	20nt,	1038	+/100.00%	0
526	20nt,	1018	+/100.00%	0
527	20nt,	1621	+/100.00%	0
528	20nt,	2539	+/100.00%	0
529	20nt,	1797	+/100.00%	0
530	20nt,	1272	+/100.00%	0
531	20nt,	1284	+/100.00%	0
532	20nt,	1095	+/100.00%	0
533	20nt,	1125	+/100.00%	0
534	20nt,	1294	+/100.00%	0
535	20nt,	3351	+/100.00%	0
536	20nt,	2478	+/100.00%	0
537	20nt,	1401	+/100.00%	0
538	20nt,	1279	+/100.00%	0
539	20nt,	3321	+/100.00%	0
540	20nt,	2943	+/100.00%	0
541	20nt,	1996	+/100.00%	0
542	20nt,	1033	+/100.00%	0
543	20nt,	2842	+/100.00%	0
544	20nt,	2320	+/100.00%	0
545	20nt,	1354	+/100.00%	0
546	20nt,	1034	+/100.00%	0
547	20nt,	3105	+/100.00%	0
548	20nt,	2685	+/100.00%	0
549	20nt,	1810	+/100.00%	0
550	20nt,	1027	+/100.00%	0
551	20nt,	3312	+/100.00%	0
552	20nt,	2580	+/100.00%	0
553	20nt,	1540	+/100.00%	0
554	20nt,	1213	+/100.00%	0
555	20nt,	15564	+/100.00%	0
556	20nt,	1359	+/100.00%	0
557	20nt,	1366	+/100.00%	0
558	20nt,	1141	+/100.00%	0
559	20nt,	1405	+/100.00%	0
560	20nt,	1378	+/100.00%	0
561	20nt,	1227	+/100.00%	0
562	20nt,	1138	+/100.00%	0
563	20nt,	1059	+/100.00%	0
564	20nt,	1044	+/100.00%	0
565	20nt,	2215	+/100.00%	0
566	20nt,	1951	+/100.00%	0
567	20nt,	1331	+/100.00%	0
568	20nt,	2097	+/100.00%	0
569	20nt,	1817	+/100.00%	0
570	20nt,	1171	+/100.00%	0
571	20nt,	6498	+/100.00%	0
572	20nt,	5612	+/100.00%	0
573	20nt,	3749	+/100.00%	0
574	20nt,	2072	+/100.00%	0
575	20nt,	2007	+/100.00%	0
576	20nt,	1116	+/100.00%	0
577	20nt,	1156	+/100.00%	0
578	20nt,	5354	+/100.00%	0
579	20nt,	4838	+/100.00%	0
580	20nt,	3331	+/100.00%	0
581	20nt,	1854	+/100.00%	0
582	20nt,	1732	+/100.00%	0
583	20nt,	1024	+/100.00%	0
584	20nt,	4680	+/100.00%	0
585	20nt,	2601	+/100.00%	0
586	20nt,	2243	+/100.00%	0
587	20nt,	1347	+/100.00%	0
588	20nt,	2840	+/100.00%	0
589	20nt,	2037	+/100.00%	0
590	20nt,	1516	+/100.00%	0
591	20nt,	1136	+/100.00%	0
592	20nt,	1777	+/100.00%	0
593	20nt,	1547	+/100.00%	0
594	20nt,	1109	+/100.00%	0
595	20nt,	1537	+/100.00%	0
596	20nt,	1492	+/100.00%	0
597	20nt,	1038	+/100.00%	0
598	20nt,	3516	+/100.00%	0
599	20nt,	2911	+/100.00%	0
600	20nt,	1903	+/100.00%	0
601	20nt,	1852	+/100.00%	0
602	20nt,	1780	+/100.00%	0
603	20nt,	1319	+/100.00%	0
604	20nt,	2166	+/100.00%	0
605	20nt,	2065	+/100.00%	0
606	20nt,	1415	+/100.00%	0
607	20nt,	1722	+/100.00%	0
608	20nt,	1645	+/100.00%	0
609	20nt,	1166	+/100.00%	0
610	20nt,	2022	+/100.00%	0
611	20nt,	1974	+/100.00%	0
612	20nt,	1407	+/100.00%	0
613	20nt,	2679	+/100.00%	0
614	20nt,	2402	+/100.00%	0
615	20nt,	1572	+/100.00%	0
616	20nt,	2646	+/100.00%	0
617	20nt,	2394	+/100.00%	0
618	20nt,	1591	+/100.00%	0
619	20nt,	2582	+/100.00%	0
620	20nt,	2377	+/100.00%	0
621	20nt,	1506	+/100.00%	0
622	20nt,	2896	+/100.00%	0
623	20nt,	2584	+/100.00%	0
624	20nt,	1662	+/100.00%	0
625	20nt,	2863	+/100.00%	0
626	20nt,	2429	+/100.00%	0
627	20nt,	1712	+/100.00%	0
628	20nt,	2514	+/100.00%	0
629	20nt,	2275	+/100.00%	0
630	20nt,	1641	+/100.00%	0
631	20nt,	2513	+/100.00%	0
632	20nt,	2238	+/100.00%	0
633	20nt,	1492	+/100.00%	0
634	20nt,	2307	+/100.00%	0
635	20nt,	2001	+/100.00%	0
636	20nt,	1337	+/100.00%	0
637	20nt,	2288	+/100.00%	0
638	20nt,	2044	+/100.00%	0
639	20nt,	1369	+/100.00%	0
640	20nt,	2197	+/100.00%	0
641	20nt,	1893	+/100.00%	0
642	20nt,	1286	+/100.00%	0
643	20nt,	2139	+/100.00%	0
644	20nt,	2087	+/100.00%	0
645	20nt,	1610	+/100.00%	0
646	20nt,	2118	+/100.00%	0
647	20nt,	1878	+/100.00%	0
648	20nt,	1179	+/100.00%	0
649	20nt,	1518	+/100.00%	0
650	20nt,	1514	+/100.00%	0
651	20nt,	1237	+/100.00%	0
652	20nt,	1504	+/100.00%	0
653	20nt,	1493	+/100.00%	0
654	20nt,	1311	+/100.00%	0
655	20nt,	1721	+/100.00%	0
656	20nt,	1562	+/100.00%	0
657	20nt,	1121	+/100.00%	0
658	20nt,	2610	+/100.00%	0
659	20nt,	2354	+/100.00%	0
660	20nt,	1562	+/100.00%	0
661	20nt,	2681	+/100.00%	0
662	20nt,	2470	+/100.00%	0
663	20nt,	1631	+/100.00%	0
664	20nt,	2534	+/100.00%	0
665	20nt,	2196	+/100.00%	0
666	20nt,	1294	+/100.00%	0
667	20nt,	1213	+/100.00%	0
668	20nt,	1169	+/100.00%	0
669	20nt,	1153	+/100.00%	0
670	20nt,	2071	+/100.00%	0
671	20nt,	1988	+/100.00%	0
672	20nt,	1416	+/100.00%	0
673	20nt,	2285	+/100.00%	0
674	20nt,	2147	+/100.00%	0
675	20nt,	1531	+/100.00%	0
676	20nt,	2313	+/100.00%	0
677	20nt,	1948	+/100.00%	0
678	20nt,	1386	+/100.00%	0
679	20nt,	2757	+/100.00%	0
680	20nt,	2438	+/100.00%	0
681	20nt,	1693	+/100.00%	0
682	20nt,	2340	+/100.00%	0
683	20nt,	2040	+/100.00%	0
684	20nt,	1505	+/100.00%	0
685	20nt,	2046	+/100.00%	0
686	20nt,	1739	+/100.00%	0
687	20nt,	1049	+/100.00%	0
688	20nt,	2738	+/100.00%	0
689	20nt,	2165	+/100.00%	0
690	20nt,	1160	+/100.00%	0
691	20nt,	2785	+/100.00%	0
692	20nt,	2391	+/100.00%	0
693	20nt,	1604	+/100.00%	0
694	20nt,	2272	+/100.00%	0
695	20nt,	2209	+/100.00%	0
696	20nt,	1605	+/100.00%	0
697	20nt,	1619	+/100.00%	0
698	20nt,	1518	+/100.00%	0
699	20nt,	10843	+/100.00%	0
700	20nt,	19197	+/100.00%	0
701	20nt,	1334	+/100.00%	0
702	20nt,	1300	+/100.00%	0
703	20nt,	1089	+/100.00%	0
704	20nt,	5813	+/100.00%	0
705	20nt,	1080	+/100.00%	0
706	20nt,	1354	+/100.00%	0
707	20nt,	1216	+/100.00%	0
708	20nt,	4704	+/100.00%	0
709	20nt,	3758	+/100.00%	0
710	20nt,	2420	+/100.00%	0
711	20nt,	1626	+/100.00%	0
712	20nt,	1209	+/100.00%	0
713	20nt,	4048	+/100.00%	0
714	20nt,	3212	+/100.00%	0
715	20nt,	2094	+/100.00%	0
716	20nt,	1380	+/100.00%	0
717	20nt,	1069	+/100.00%	0
718	20nt,	4160	+/100.00%	0
719	20nt,	3856	+/100.00%	0
720	20nt,	2589	+/100.00%	0
721	20nt,	1336	+/100.00%	0
722	20nt,	1211	+/100.00%	0
723	20nt,	3695	+/100.00%	0
724	20nt,	3356	+/100.00%	0
725	20nt,	2343	+/100.00%	0
726	20nt,	1235	+/100.00%	0
727	20nt,	1078	+/100.00%	0
728	20nt,	3626	+/100.00%	0
729	20nt,	3427	+/100.00%	0
730	20nt,	2295	+/100.00%	0
731	20nt,	1314	+/100.00%	0
732	20nt,	1214	+/100.00%	0
733	20nt,	3412	+/100.00%	0
734	20nt,	3086	+/100.00%	0
735	20nt,	2090	+/100.00%	0
736	20nt,	1203	+/100.00%	0
737	20nt,	1072	+/100.00%	0
738	20nt,	3388	+/100.00%	0
739	20nt,	3214	+/100.00%	0
740	20nt,	2209	+/100.00%	0
741	20nt,	1165	+/100.00%	0
742	20nt,	1162	+/100.00%	0
743	20nt,	3352	+/100.00%	0
744	20nt,	3027	+/100.00%	0
745	20nt,	1947	+/100.00%	0
746	20nt,	1081	+/100.00%	0
747	20nt,	1044	+/100.00%	0
748	20nt,	4005	+/100.00%	0
749	20nt,	3731	+/100.00%	0
750	20nt,	2631	+/100.00%	0
751	20nt,	1442	+/100.00%	0
752	20nt,	1290	+/100.00%	0
753	20nt,	4155	+/100.00%	0
754	20nt,	3780	+/100.00%	0
755	20nt,	2579	+/100.00%	0
756	20nt,	1476	+/100.00%	0
757	20nt,	1270	+/100.00%	0
758	20nt,	4091	+/100.00%	0
759	20nt,	3976	+/100.00%	0
760	20nt,	3045	+/100.00%	0
761	20nt,	1808	+/100.00%	0
762	20nt,	1149	+/100.00%	0
763	20nt,	3674	+/100.00%	0
764	20nt,	3333	+/100.00%	0
765	20nt,	2194	+/100.00%	0
766	20nt,	1234	+/100.00%	0
767	20nt,	1119	+/100.00%	0
768	20nt,	3537	+/100.00%	0
769	20nt,	3161	+/100.00%	0
770	20nt,	2017	+/100.00%	0
771	20nt,	1184	+/100.00%	0
772	20nt,	1175	+/100.00%	0
773	20nt,	3320	+/100.00%	0
774	20nt,	2901	+/100.00%	0
775	20nt,	1918	+/100.00%	0
776	20nt,	1040	+/100.00%	0
777	20nt,	1009	+/100.00%	0
778	20nt,	4021	+/100.00%	0
779	20nt,	3728	+/100.00%	0
780	20nt,	2759	+/100.00%	0
781	20nt,	1645	+/100.00%	0
782	20nt,	1137	+/100.00%	0
783	20nt,	4337	+/100.00%	0
784	20nt,	4200	+/100.00%	0
785	20nt,	2943	+/100.00%	0
786	20nt,	1720	+/100.00%	0
787	20nt,	1314	+/100.00%	0
788	20nt,	3153	+/100.00%	0
789	20nt,	3099	+/100.00%	0
790	20nt,	2272	+/100.00%	0
791	20nt,	1527	+/100.00%	0
792	20nt,	1011	+/100.00%	0
793	20nt,	4315	+/100.00%	0
794	20nt,	3523	+/100.00%	0
795	20nt,	2279	+/100.00%	0
796	20nt,	1329	+/100.00%	0
797	20nt,	1308	+/100.00%	0
798	20nt,	4805	+/100.00%	0
799	20nt,	3762	+/100.00%	0
800	20nt,	2395	+/100.00%	0
801	20nt,	1496	+/100.00%	0
802	20nt,	1489	+/100.00%	0
803	20nt,	3928	+/100.00%	0
804	20nt,	3321	+/100.00%	0
805	20nt,	2026	+/100.00%	0
806	20nt,	1265	+/100.00%	0
807	20nt,	1051	+/100.00%	0
808	20nt,	4483	+/100.00%	0
809	20nt,	3739	+/100.00%	0
810	20nt,	2424	+/100.00%	0
811	20nt,	1433	+/100.00%	0
812	20nt,	1278	+/100.00%	0
813	20nt,	3236	+/100.00%	0
814	20nt,	2956	+/100.00%	0
815	20nt,	2031	+/100.00%	0
816	20nt,	1445	+/100.00%	0
817	20nt,	1224	+/100.00%	0
818	20nt,	1921	+/100.00%	0
819	20nt,	1752	+/100.00%	0
820	20nt,	1671	+/100.00%	0
821	20nt,	1207	+/100.00%	0
822	20nt,	1618	+/100.00%	0
823	20nt,	1452	+/100.00%	0
824	20nt,	1304	+/100.00%	0
825	20nt,	1007	+/100.00%	0
826	20nt,	2138	+/100.00%	0
827	20nt,	2128	+/100.00%	0
828	20nt,	1723	+/100.00%	0
829	20nt,	1137	+/100.00%	0
830	20nt,	3164	+/100.00%	0
831	20nt,	2764	+/100.00%	0
832	20nt,	1868	+/100.00%	0
833	20nt,	1047	+/100.00%	0
834	20nt,	3104	+/100.00%	0
835	20nt,	2696	+/100.00%	0
836	20nt,	1998	+/100.00%	0
837	20nt,	1036	+/100.00%	0
838	20nt,	2983	+/100.00%	0
839	20nt,	2697	+/100.00%	0
840	20nt,	1909	+/100.00%	0
841	20nt,	1047	+/100.00%	0
842	20nt,	2865	+/100.00%	0
843	20nt,	2825	+/100.00%	0
844	20nt,	2092	+/100.00%	0
845	20nt,	1440	+/100.00%	0
846	20nt,	3165	+/100.00%	0
847	20nt,	2728	+/100.00%	0
848	20nt,	1978	+/100.00%	0
849	20nt,	1010	+/100.00%	0
850	20nt,	2959	+/100.00%	0
851	20nt,	2569	+/100.00%	0
852	20nt,	1740	+/100.00%	0
853	20nt,	1074	+/100.00%	0
854	20nt,	2870	+/100.00%	0
855	20nt,	2801	+/100.00%	0
856	20nt,	2050	+/100.00%	0
857	20nt,	1341	+/100.00%	0
858	20nt,	2410	+/100.00%	0
859	20nt,	2117	+/100.00%	0
860	20nt,	1888	+/100.00%	0
861	20nt,	1132	+/100.00%	0
862	20nt,	2726	+/100.00%	0
863	20nt,	2623	+/100.00%	0
864	20nt,	1874	+/100.00%	0
865	20nt,	1153	+/100.00%	0
866	20nt,	9642	+/100.00%	0
867	20nt,	9123	+/100.00%	0
868	20nt,	6388	+/100.00%	0
869	20nt,	3852	+/100.00%	0
870	20nt,	2878	+/100.00%	0
871	20nt,	2231	+/100.00%	0
872	20nt,	1422	+/100.00%	0
873	20nt,	10166	+/100.00%	0
874	20nt,	9639	+/100.00%	0
875	20nt,	6774	+/100.00%	0
876	20nt,	4041	+/100.00%	0
877	20nt,	3071	+/100.00%	0
878	20nt,	2291	+/100.00%	0
879	20nt,	1539	+/100.00%	0
880	20nt,	5955	+/100.00%	0
881	20nt,	5035	+/100.00%	0
882	20nt,	3172	+/100.00%	0
883	20nt,	1844	+/100.00%	0
884	20nt,	1621	+/100.00%	0
885	20nt,	4555	+/100.00%	0
886	20nt,	4426	+/100.00%	0
887	20nt,	3154	+/100.00%	0
888	20nt,	1813	+/100.00%	0
889	20nt,	1405	+/100.00%	0
890	20nt,	1083	+/100.00%	0
891	20nt,	7194	+/100.00%	0
892	20nt,	5953	+/100.00%	0
893	20nt,	3670	+/100.00%	0
894	20nt,	2339	+/100.00%	0
895	20nt,	1894	+/100.00%	0
896	20nt,	1074	+/100.00%	0
897	20nt,	4868	+/100.00%	0
898	20nt,	4448	+/100.00%	0
899	20nt,	3088	+/100.00%	0
900	20nt,	1720	+/100.00%	0
901	20nt,	1371	+/100.00%	0
902	20nt,	9541	+/100.00%	0
903	20nt,	8452	+/100.00%	0
904	20nt,	4950	+/100.00%	0
905	20nt,	3028	+/100.00%	0
906	20nt,	2573	+/100.00%	0
907	20nt,	1385	+/100.00%	0
908	20nt,	5669	+/100.00%	0
909	20nt,	4883	+/100.00%	0
910	20nt,	3111	+/100.00%	0
911	20nt,	1790	+/100.00%	0
912	20nt,	1704	+/100.00%	0
913	20nt,	5026	+/100.00%	0
914	20nt,	4642	+/100.00%	0
915	20nt,	3970	+/100.00%	0
916	20nt,	2413	+/100.00%	0
917	20nt,	1604	+/100.00%	0
918	20nt,	1358	+/100.00%	0
919	20nt,	1895	+/100.00%	0
920	20nt,	1818	+/100.00%	0
921	20nt,	1262	+/100.00%	0
922	20nt,	1242	+/100.00%	0
923	20nt,	7310	+/100.00%	0
924	20nt,	6377	+/100.00%	0
925	20nt,	4083	+/100.00%	0
926	20nt,	2243	+/100.00%	0
927	20nt,	2213	+/100.00%	0
928	20nt,	1201	+/100.00%	0
929	20nt,	2023	+/100.00%	0
930	20nt,	1755	+/100.00%	0
931	20nt,	1080	+/100.00%	0
932	20nt,	9022	+/100.00%	0
933	20nt,	7592	+/100.00%	0
934	20nt,	4778	+/100.00%	0
935	20nt,	2814	+/100.00%	0
936	20nt,	2684	+/100.00%	0
937	20nt,	1393	+/100.00%	0
938	20nt,	1388	+/100.00%	0
939	20nt,	1347	+/100.00%	0
940	20nt,	1000	+/100.00%	0
941	20nt,	1310	+/100.00%	0
942	20nt,	11183	+/100.00%	0
943	20nt,	10133	+/100.00%	0
944	20nt,	6927	+/100.00%	0
945	20nt,	3823	+/100.00%	0
946	20nt,	3354	+/100.00%	0
947	20nt,	2244	+/100.00%	0
948	20nt,	1386	+/100.00%	0
949	20nt,	1092	+/100.00%	0
950	20nt,	1429	+/100.00%	0
951	20nt,	14054	+/100.00%	0
952	20nt,	12911	+/100.00%	0
953	20nt,	8951	+/100.00%	0
954	20nt,	5114	+/100.00%	0
955	20nt,	4306	+/100.00%	0
956	20nt,	2899	+/100.00%	0
957	20nt,	1860	+/100.00%	0
958	20nt,	1066	+/100.00%	0
959	20nt,	1424	+/100.00%	0
960	20nt,	20403	+/100.00%	0
961	20nt,	17448	+/100.00%	0
962	20nt,	11047	+/100.00%	0
963	20nt,	6353	+/100.00%	0
964	20nt,	6056	+/100.00%	0
965	20nt,	3135	+/100.00%	0
966	20nt,	1897	+/100.00%	0
967	20nt,	1099	+/100.00%	0
968	20nt,	1478	+/100.00%	0
969	20nt,	27751	+/100.00%	0
970	20nt,	23861	+/100.00%	0
971	20nt,	15648	+/100.00%	0
972	20nt,	8838	+/100.00%	0
973	20nt,	8224	+/100.00%	0
974	20nt,	4168	+/100.00%	0
975	20nt,	2589	+/100.00%	0
976	20nt,	1285	+/100.00%	0
977	20nt,	1038	+/100.00%	0
978	20nt,	2286	+/100.00%	0
979	20nt,	1804	+/100.00%	0
980	20nt,	4631	+/100.00%	0
981	20nt,	4375	+/100.00%	0
982	20nt,	3446	+/100.00%	0
983	20nt,	2218	+/100.00%	0
984	20nt,	1208	+/100.00%	0
985	20nt,	1134	+/100.00%	0
986	20nt,	5690	+/100.00%	0
987	20nt,	5480	+/100.00%	0
988	20nt,	4065	+/100.00%	0
989	20nt,	2321	+/100.00%	0
990	20nt,	1850	+/100.00%	0
991	20nt,	1332	+/100.00%	0
992	20nt,	4771	+/100.00%	0
993	20nt,	4481	+/100.00%	0
994	20nt,	3262	+/100.00%	0
995	20nt,	1957	+/100.00%	0
996	20nt,	1695	+/100.00%	0
997	20nt,	1082	+/100.00%	0
998	20nt,	6361	+/100.00%	0
999	20nt,	5915	+/100.00%	0
1000	20nt,	4055	+/100.00%	0
1001	20nt,	2526	+/100.00%	0
1002	20nt,	1777	+/100.00%	0
1003	20nt,	1431	+/100.00%	0
1004	20nt,	4341	+/100.00%	0
1005	20nt,	4159	+/100.00%	0
1006	20nt,	3033	+/100.00%	0
1007	20nt,	1971	+/100.00%	0
1008	20nt,	1246	+/100.00%	0
1009	20nt,	1123	+/100.00%	0
1010	20nt,	4321	+/100.00%	0
1011	20nt,	4114	+/100.00%	0
1012	20nt,	2958	+/100.00%	0
1013	20nt,	1814	+/100.00%	0
1014	20nt,	1259	+/100.00%	0
1015	20nt,	1114	+/100.00%	0
1016	20nt,	3749	+/100.00%	0
1017	20nt,	3738	+/100.00%	0
1018	20nt,	2871	+/100.00%	0
1019	20nt,	1796	+/100.00%	0
1020	20nt,	1125	+/100.00%	0
1021	20nt,	1086	+/100.00%	0
1022	20nt,	6070	+/100.00%	0
1023	20nt,	5715	+/100.00%	0
1024	20nt,	4088	+/100.00%	0
1025	20nt,	2558	+/100.00%	0
1026	20nt,	1922	+/100.00%	0
1027	20nt,	1519	+/100.00%	0
1028	20nt,	10425	+/100.00%	0
1029	20nt,	9300	+/100.00%	0
1030	20nt,	5273	+/100.00%	0
1031	20nt,	2330	+/100.00%	0
1032	20nt,	1185	+/100.00%	0
1033	20nt,	1153	+/100.00%	0
1034	20nt,	5976	+/100.00%	0
1035	20nt,	5754	+/100.00%	0
1036	20nt,	4465	+/100.00%	0
1037	20nt,	2712	+/100.00%	0
1038	20nt,	1827	+/100.00%	0
1039	20nt,	1519	+/100.00%	0
1040	20nt,	7410	+/100.00%	0
1041	20nt,	6576	+/100.00%	0
1042	20nt,	4672	+/100.00%	0
1043	20nt,	2616	+/100.00%	0
1044	20nt,	2263	+/100.00%	0
1045	20nt,	1535	+/100.00%	0
1046	20nt,	4129	+/100.00%	0
1047	20nt,	3862	+/100.00%	0
1048	20nt,	2795	+/100.00%	0
1049	20nt,	1702	+/100.00%	0
1050	20nt,	1253	+/100.00%	0
1051	20nt,	1046	+/100.00%	0
1052	20nt,	5332	+/100.00%	0
1053	20nt,	4683	+/100.00%	0
1054	20nt,	3266	+/100.00%	0
1055	20nt,	1925	+/100.00%	0
1056	20nt,	1630	+/100.00%	0
1057	20nt,	1178	+/100.00%	0
1058	20nt,	5003	+/100.00%	0
1059	20nt,	3274	+/100.00%	0
1060	20nt,	2640	+/100.00%	0
1061	20nt,	1809	+/100.00%	0
1062	20nt,	1290	+/100.00%	0
1063	20nt,	7355	+/100.00%	0
1064	20nt,	4444	+/100.00%	0
1065	20nt,	2758	+/100.00%	0
1066	20nt,	1980	+/100.00%	0
1067	20nt,	1273	+/100.00%	0
1068	20nt,	6994	+/100.00%	0
1069	20nt,	5919	+/100.00%	0
1070	20nt,	3908	+/100.00%	0
1071	20nt,	2294	+/100.00%	0
1072	20nt,	2259	+/100.00%	0
1073	20nt,	1221	+/100.00%	0
1074	20nt,	11584	+/100.00%	0
1075	20nt,	9198	+/100.00%	0
1076	20nt,	5706	+/100.00%	0
1077	20nt,	3538	+/100.00%	0
1078	20nt,	3026	+/100.00%	0
1079	20nt,	1496	+/100.00%	0
1080	20nt,	9494	+/100.00%	0
1081	20nt,	8015	+/100.00%	0
1082	20nt,	5208	+/100.00%	0
1083	20nt,	2990	+/100.00%	0
1084	20nt,	2915	+/100.00%	0
1085	20nt,	1543	+/100.00%	0
1086	20nt,	7243	+/100.00%	0
1087	20nt,	6427	+/100.00%	0
1088	20nt,	3972	+/100.00%	0
1089	20nt,	2609	+/100.00%	0
1090	20nt,	1028	+/100.00%	0
1091	20nt,	2170	+/100.00%	0
1092	20nt,	2130	+/100.00%	0
1093	20nt,	1781	+/100.00%	0
1094	20nt,	1634	+/100.00%	0
1095	20nt,	1173	+/100.00%	0
1096	20nt,	3743	+/100.00%	0
1097	20nt,	2727	+/100.00%	0
1098	20nt,	2619	+/100.00%	0
1099	20nt,	1656	+/100.00%	0
1100	20nt,	1004	+/100.00%	0
1101	20nt,	1838	+/100.00%	0
1102	20nt,	1230	+/100.00%	0
1103	20nt,	1010	+/100.00%	0
1104	20nt,	19121	+/100.00%	0
1105	20nt,	18635	+/100.00%	0
1106	20nt,	13984	+/100.00%	0
1107	20nt,	8665	+/100.00%	0
1108	20nt,	5397	+/100.00%	0
1109	20nt,	5273	+/100.00%	0
1110	20nt,	3286	+/100.00%	0
1111	20nt,	1711	+/100.00%	0
1112	20nt,	2571	+/100.00%	0
1113	20nt,	2029	+/100.00%	0
1114	20nt,	1828	+/100.00%	0
1115	20nt,	1113	+/100.00%	0
1116	20nt,	22887	+/100.00%	0
1117	20nt,	19832	+/100.00%	0
1118	20nt,	12881	+/100.00%	0
1119	20nt,	7057	+/100.00%	0
1120	20nt,	6882	+/100.00%	0
1121	20nt,	3612	+/100.00%	0
1122	20nt,	2323	+/100.00%	0
1123	20nt,	1162	+/100.00%	0
1124	20nt,	1638	+/100.00%	0
1125	20nt,	1258	+/100.00%	0
1126	20nt,	4157	+/100.00%	0
1127	20nt,	2590	+/100.00%	0
1128	20nt,	2564	+/100.00%	0
1129	20nt,	1732	+/100.00%	0
1130	20nt,	1111	+/100.00%	0
1131	20nt,	1042	+/100.00%	0
1132	20nt,	1399	+/100.00%	0
1133	20nt,	1192	+/100.00%	0
1134	20nt,	1091	+/100.00%	0
1135	20nt,	5447	+/100.00%	0
1136	20nt,	5078	+/100.00%	0
1137	20nt,	3870	+/100.00%	0
1138	20nt,	2717	+/100.00%	0
1139	20nt,	1648	+/100.00%	0
1140	20nt,	1227	+/100.00%	0
1141	20nt,	1189	+/100.00%	0
1142	20nt,	4354	+/100.00%	0
1143	20nt,	4204	+/100.00%	0
1144	20nt,	3255	+/100.00%	0
1145	20nt,	2140	+/100.00%	0
1146	20nt,	1411	+/100.00%	0
1147	20nt,	1209	+/100.00%	0
1148	20nt,	1093	+/100.00%	0
1149	20nt,	10128	+/100.00%	0
1150	20nt,	10062	+/100.00%	0
1151	20nt,	7550	+/100.00%	0
1152	20nt,	4916	+/100.00%	0
1153	20nt,	2971	+/100.00%	0
1154	20nt,	2832	+/100.00%	0
1155	20nt,	1951	+/100.00%	0
1156	20nt,	8799	+/100.00%	0
1157	20nt,	8049	+/100.00%	0
1158	20nt,	6040	+/100.00%	0
1159	20nt,	3626	+/100.00%	0
1160	20nt,	2703	+/100.00%	0
1161	20nt,	2072	+/100.00%	0
1162	20nt,	1282	+/100.00%	0
1163	20nt,	7463	+/100.00%	0
1164	20nt,	7126	+/100.00%	0
1165	20nt,	5183	+/100.00%	0
1166	20nt,	2994	+/100.00%	0
1167	20nt,	2663	+/100.00%	0
1168	20nt,	1661	+/100.00%	0
1169	20nt,	1090	+/100.00%	0
1170	20nt,	11029	+/100.00%	0
1171	20nt,	10245	+/100.00%	0
1172	20nt,	7290	+/100.00%	0
1173	20nt,	4234	+/100.00%	0
1174	20nt,	3530	+/100.00%	0
1175	20nt,	2511	+/100.00%	0
1176	20nt,	1625	+/100.00%	0
1177	20nt,	7007	+/100.00%	0
1178	20nt,	6717	+/100.00%	0
1179	20nt,	4961	+/100.00%	0
1180	20nt,	3144	+/100.00%	0
1181	20nt,	2036	+/100.00%	0
1182	20nt,	1831	+/100.00%	0
1183	20nt,	1219	+/100.00%	0
1184	20nt,	6677	+/100.00%	0
1185	20nt,	6355	+/100.00%	0
1186	20nt,	4793	+/100.00%	0
1187	20nt,	3027	+/100.00%	0
1188	20nt,	1965	+/100.00%	0
1189	20nt,	1837	+/100.00%	0
1190	20nt,	1281	+/100.00%	0
1191	20nt,	9023	+/100.00%	0
1192	20nt,	8419	+/100.00%	0
1193	20nt,	5548	+/100.00%	0
1194	20nt,	3195	+/100.00%	0
1195	20nt,	2805	+/100.00%	0
1196	20nt,	1806	+/100.00%	0
1197	20nt,	1205	+/100.00%	0
1198	20nt,	11183	+/100.00%	0
1199	20nt,	10681	+/100.00%	0
1200	20nt,	7502	+/100.00%	0
1201	20nt,	4451	+/100.00%	0
1202	20nt,	3264	+/100.00%	0
1203	20nt,	2661	+/100.00%	0
1204	20nt,	1690	+/100.00%	0
1205	20nt,	12767	+/100.00%	0
1206	20nt,	11059	+/100.00%	0
1207	20nt,	7034	+/100.00%	0
1208	20nt,	3880	+/100.00%	0
1209	20nt,	3851	+/100.00%	0
1210	20nt,	1983	+/100.00%	0
1211	20nt,	1148	+/100.00%	0
1212	20nt,	6221	+/100.00%	0
1213	20nt,	5892	+/100.00%	0
1214	20nt,	4570	+/100.00%	0
1215	20nt,	2917	+/100.00%	0
1216	20nt,	1910	+/100.00%	0
1217	20nt,	1591	+/100.00%	0
1218	20nt,	1140	+/100.00%	0
1219	20nt,	1467	+/100.00%	0
1220	20nt,	1084	+/100.00%	0
1221	20nt,	11463	+/100.00%	0
1222	20nt,	10335	+/100.00%	0
1223	20nt,	7937	+/100.00%	0
1224	20nt,	4782	+/100.00%	0
1225	20nt,	2656	+/100.00%	0
1226	20nt,	1447	+/100.00%	0
1227	20nt,	13522	+/100.00%	0
1228	20nt,	11845	+/100.00%	0
1229	20nt,	7804	+/100.00%	0
1230	20nt,	4328	+/100.00%	0
1231	20nt,	4157	+/100.00%	0
1232	20nt,	2268	+/100.00%	0
1233	20nt,	1417	+/100.00%	0
1234	20nt,	1471	+/100.00%	0
1235	20nt,	5571	+/100.00%	0
1236	20nt,	24483	+/100.00%	0
1237	20nt,	4307	+/100.00%	0
1238	20nt,	3229	+/100.00%	0
1239	20nt,	1573	+/100.00%	0
1240	20nt,	1143	+/100.00%	0
1241	20nt,	5458	+/100.00%	0
1242	20nt,	4888	+/100.00%	0
1243	20nt,	4582	+/100.00%	0
1244	20nt,	3465	+/100.00%	0
1245	20nt,	2794	+/100.00%	0
1246	20nt,	2419	+/100.00%	0
1247	20nt,	1712	+/100.00%	0
1248	20nt,	1222	+/100.00%	0
1249	20nt,	1039	+/100.00%	0
1250	20nt,	1516	+/100.00%	0
1251	20nt,	1384	+/100.00%	0
1252	20nt,	22077	+/100.00%	0
1253	20nt,	14047	+/100.00%	0
1254	20nt,	9190	+/100.00%	0
1255	20nt,	7378	+/100.00%	0
1256	20nt,	4734	+/100.00%	0
1257	20nt,	2671	+/100.00%	0
1258	20nt,	1600	+/100.00%	0
1259	20nt,	1199	+/100.00%	0
1260	20nt,	13863	+/100.00%	0
1261	20nt,	13167	+/100.00%	0
1262	20nt,	8870	+/100.00%	0
1263	20nt,	5096	+/100.00%	0
1264	20nt,	3876	+/100.00%	0
1265	20nt,	2870	+/100.00%	0
1266	20nt,	1871	+/100.00%	0
1267	20nt,	1032	+/100.00%	0
1268	20nt,	13390	+/100.00%	0
1269	20nt,	12582	+/100.00%	0
1270	20nt,	11942	+/100.00%	0
1271	20nt,	9006	+/100.00%	0
1272	20nt,	6315	+/100.00%	0
1273	20nt,	5984	+/100.00%	0
1274	20nt,	4966	+/100.00%	0
1275	20nt,	3291	+/100.00%	0
1276	20nt,	2431	+/100.00%	0
1277	20nt,	1639	+/100.00%	0
1278	20nt,	2567	+/100.00%	0
1279	20nt,	1830	+/100.00%	0
1280	20nt,	1188	+/100.00%	0
1281	20nt,	27358	+/100.00%	0
1282	20nt,	27159	+/100.00%	0
1283	20nt,	17065	+/100.00%	0
1284	20nt,	14460	+/100.00%	0
1285	20nt,	7409	+/100.00%	0
1286	20nt,	4675	+/100.00%	0
1287	20nt,	2486	+/100.00%	0
1288	20nt,	1677	+/100.00%	0
1289	20nt,	1267	+/100.00%	0
1290	20nt,	7333	+/100.00%	0
1291	20nt,	6638	+/100.00%	0
1292	20nt,	4243	+/100.00%	0
1293	20nt,	2277	+/100.00%	0
1294	20nt,	2137	+/100.00%	0
1295	20nt,	1080	+/100.00%	0
1296	20nt,	4573	+/100.00%	0
1297	20nt,	2593	+/100.00%	0
1298	20nt,	1706	+/100.00%	0
1299	20nt,	1544	+/100.00%	0
1300	20nt,	10890	+/100.00%	0
1301	20nt,	8947	+/100.00%	0
1302	20nt,	5397	+/100.00%	0
1303	20nt,	3723	+/100.00%	0
1304	20nt,	2550	+/100.00%	0
1305	20nt,	1275	+/100.00%	0
1306	20nt,	1464	+/100.00%	0
1307	20nt,	1212	+/100.00%	0
1308	20nt,	13340	+/100.00%	0
1309	20nt,	11499	+/100.00%	0
1310	20nt,	7191	+/100.00%	0
1311	20nt,	4243	+/100.00%	0
1312	20nt,	3858	+/100.00%	0
1313	20nt,	2047	+/100.00%	0
1314	20nt,	1273	+/100.00%	0
1315	20nt,	1002	+/100.00%	0
1316	20nt,	11239	+/100.00%	0
1317	20nt,	9589	+/100.00%	0
1318	20nt,	6056	+/100.00%	0
1319	20nt,	3630	+/100.00%	0
1320	20nt,	3236	+/100.00%	0
1321	20nt,	1729	+/100.00%	0
1322	20nt,	1081	+/100.00%	0
1323	20nt,	1469	+/100.00%	0
1324	20nt,	1203	+/100.00%	0
1325	20nt,	3799	+/100.00%	0
1326	20nt,	3528	+/100.00%	0
1327	20nt,	2400	+/100.00%	0
1328	20nt,	1386	+/100.00%	0
1329	20nt,	1213	+/100.00%	0
1330	20nt,	1165	+/100.00%	0
1331	20nt,	1769	+/100.00%	0
1332	20nt,	3868	+/100.00%	0
1333	20nt,	10683	+/100.00%	0
1334	20nt,	1425	+/100.00%	0
1335	20nt,	2267	+/100.00%	0
1336	20nt,	14359	+/100.00%	0
1337	20nt,	1375	+/100.00%	0
1338	20nt,	1234	+/100.00%	0
1339	20nt,	1003	+/100.00%	0
1340	20nt,	1718	+/100.00%	0
1341	20nt,	3306	+/100.00%	0
1342	20nt,	4689	+/100.00%	0
1343	20nt,	5282	+/100.00%	0
1344	20nt,	1498	+/100.00%	0
1345	20nt,	1850	+/100.00%	0
1346	20nt,	2565	+/100.00%	0
1347	20nt,	4113	+/100.00%	0
1348	20nt,	5426	+/100.00%	0
1349	20nt,	1066	+/100.00%	0
1350	20nt,	2087	+/100.00%	0
1351	20nt,	2576	+/100.00%	0
1352	20nt,	4243	+/100.00%	0
1353	20nt,	5025	+/100.00%	0
1354	20nt,	1277	+/100.00%	0
1355	20nt,	1307	+/100.00%	0
1356	20nt,	2336	+/100.00%	0
1357	20nt,	4690	+/100.00%	0
1358	20nt,	6770	+/100.00%	0
1359	20nt,	9216	+/100.00%	0
1360	20nt,	15402	+/100.00%	0
1361	20nt,	18533	+/100.00%	0
1362	20nt,	1060	+/100.00%	0
1363	20nt,	2005	+/100.00%	0
1364	20nt,	2016	+/100.00%	0
1365	20nt,	3484	+/100.00%	0
1366	20nt,	5650	+/100.00%	0
1367	20nt,	6367	+/100.00%	0
1368	20nt,	1036	+/100.00%	0
1369	20nt,	1470	+/100.00%	0
1370	20nt,	2791	+/100.00%	0
1371	20nt,	5994	+/100.00%	0
1372	20nt,	9301	+/100.00%	0
1373	20nt,	13204	+/100.00%	0
1374	20nt,	24502	+/100.00%	0
1375	20nt,	30683	+/100.00%	0
1376	20nt,	1085	+/100.00%	0
1377	20nt,	1352	+/100.00%	0
1378	20nt,	1407	+/100.00%	0
1379	20nt,	2069	+/100.00%	0
1380	20nt,	2419	+/100.00%	0
1381	20nt,	2847	+/100.00%	0
1382	20nt,	1005	+/100.00%	0
1383	20nt,	1907	+/100.00%	0
1384	20nt,	4211	+/100.00%	0
1385	20nt,	9637	+/100.00%	0
1386	20nt,	15106	+/100.00%	0
1387	20nt,	15282	+/100.00%	0
1388	20nt,	4393	+/100.00%	0
1389	20nt,	1090	+/100.00%	0
1390	20nt,	2076	+/100.00%	0
1391	20nt,	1031	+/100.00%	0
1392	20nt,	1470	+/100.00%	0
1393	20nt,	1336	+/100.00%	0
1394	20nt,	10901	+/100.00%	0
1395	20nt,	10517	+/100.00%	0
1396	20nt,	6623	+/100.00%	0
1397	20nt,	3395	+/100.00%	0
1398	20nt,	4522	+/100.00%	0
1399	20nt,	1241	+/100.00%	0
1400	20nt,	100311	+/100.00%	0
1401	20nt,	78615	+/100.00%	0
1402	20nt,	70686	+/100.00%	0
1403	20nt,	37150	+/100.00%	0
1404	20nt,	18733	+/100.00%	0
1405	20nt,	15734	+/100.00%	0
1406	20nt,	11494	+/100.00%	0
1407	20nt,	6053	+/100.00%	0
1408	20nt,	3040	+/100.00%	0
1409	20nt,	1769	+/100.00%	0
1410	20nt,	7514	+/100.00%	0
1411	20nt,	5890	+/100.00%	0
1412	20nt,	3624	+/100.00%	0
1413	20nt,	2601	+/100.00%	0
1414	20nt,	1828	+/100.00%	0
1415	20nt,	10901	+/100.00%	0
1416	20nt,	9148	+/100.00%	0
1417	20nt,	5939	+/100.00%	0
1418	20nt,	3357	+/100.00%	0
1419	20nt,	3197	+/100.00%	0
1420	20nt,	1667	+/100.00%	0
1421	20nt,	1018	+/100.00%	0
1422	20nt,	6245	+/100.00%	0
1423	20nt,	4673	+/100.00%	0
1424	20nt,	2607	+/100.00%	0
1425	20nt,	2363	+/100.00%	0
1426	20nt,	1329	+/100.00%	0
1427	20nt,	1011	+/100.00%	0
1428	20nt,	2975	+/100.00%	0
1429	20nt,	2432	+/100.00%	0
1430	20nt,	1555	+/100.00%	0
1431	20nt,	1095	+/100.00%	0
1432	20nt,	1116	+/100.00%	0
1433	20nt,	19057	+/100.00%	0
1434	20nt,	16351	+/100.00%	0
1435	20nt,	10260	+/100.00%	0
1436	20nt,	5613	+/100.00%	0
1437	20nt,	5406	+/100.00%	0
1438	20nt,	2782	+/100.00%	0
1439	20nt,	1593	+/100.00%	0
1440	20nt,	1916	+/100.00%	0
1441	20nt,	1777	+/100.00%	0
1442	20nt,	1215	+/100.00%	0
1443	20nt,	3294	+/100.00%	0
1444	20nt,	2968	+/100.00%	0
1445	20nt,	2142	+/100.00%	0
1446	20nt,	1199	+/100.00%	0
1447	20nt,	1032	+/100.00%	0
1448	20nt,	3693	+/100.00%	0
1449	20nt,	3210	+/100.00%	0
1450	20nt,	2152	+/100.00%	0
1451	20nt,	1245	+/100.00%	0
1452	20nt,	1196	+/100.00%	0
1453	20nt,	1706	+/100.00%	0
1454	20nt,	1653	+/100.00%	0
1455	20nt,	1106	+/100.00%	0
1456	20nt,	1129	+/100.00%	0
1457	20nt,	2167	+/100.00%	0
1458	20nt,	1870	+/100.00%	0
1459	20nt,	1231	+/100.00%	0
1460	20nt,	1338	+/100.00%	0
1461	20nt,	3596	+/100.00%	0
1462	20nt,	2308	+/100.00%	0
1463	20nt,	1188	+/100.00%	0
1464	20nt,	1005	+/100.00%	0
1465	20nt,	1242	+/100.00%	0
1466	20nt,	10314	+/100.00%	0
1467	20nt,	1827	+/100.00%	0
1468	20nt,	1262	+/100.00%	0
1469	20nt,	1710	+/100.00%	0
1470	20nt,	58603	+/100.00%	0
1471	20nt,	5100	+/100.00%	0
1472	20nt,	1294	+/100.00%	0
1473	20nt,	1252	+/100.00%	0
1474	20nt,	1588	+/100.00%	0
1475	20nt,	1372	+/100.00%	0
1476	20nt,	1627	+/100.00%	0
1477	20nt,	1475	+/100.00%	0
1478	20nt,	1409	+/100.00%	0
1479	20nt,	1331	+/100.00%	0
1480	20nt,	2409	+/100.00%	0
1481	20nt,	2161	+/100.00%	0
1482	20nt,	1499	+/100.00%	0
1483	20nt,	2377	+/100.00%	0
1484	20nt,	2112	+/100.00%	0
1485	20nt,	1471	+/100.00%	0
1486	20nt,	2442	+/100.00%	0
1487	20nt,	1844	+/100.00%	0
1488	20nt,	1817	+/100.00%	0
1489	20nt,	1768	+/100.00%	0
1490	20nt,	1674	+/100.00%	0
1491	20nt,	1636	+/100.00%	0
1492	20nt,	1623	+/100.00%	0
1493	20nt,	1597	+/100.00%	0
1494	20nt,	1553	+/100.00%	0
1495	20nt,	1518	+/100.00%	0
1496	20nt,	1506	+/100.00%	0
1497	20nt,	1464	+/100.00%	0
1498	20nt,	1448	+/100.00%	0
1499	20nt,	1443	+/100.00%	0
1500	20nt,	1420	+/100.00%	0
1501	20nt,	1405	+/100.00%	0
1502	20nt,	1403	+/100.00%	0
1503	20nt,	1365	+/100.00%	0
1504	20nt,	1345	+/100.00%	0
1505	20nt,	1292	+/100.00%	0
1506	20nt,	1292	+/100.00%	0
1507	20nt,	1244	+/100.00%	0
1508	20nt,	1173	+/100.00%	0
1509	20nt,	1165	+/100.00%	0
1510	20nt,	1149	+/100.00%	0
1511	20nt,	1103	+/100.00%	0
1512	20nt,	1098	+/100.00%	0
1513	20nt,	1098	+/100.00%	0
1514	20nt,	1088	+/100.00%	0
1515	20nt,	1063	+/100.00%	0
1516	20nt,	1055	+/100.00%	0
1517	20nt,	1046	+/100.00%	0
1518	20nt,	1039	+/100.00%	0
1519	20nt,	1028	+/100.00%	0
1520	20nt,	1020	+/100.00%	0
1521	20nt,	1018	+/100.00%	0
1522	20nt,	1297	+/100.00%	0
1523	20nt,	1836	+/100.00%	0
1524	20nt,	1004	+/100.00%	0
1525	20nt,	1642	+/100.00%	0
1526	20nt,	4095	+/100.00%	0
1527	20nt,	5047	+/100.00%	0
1528	20nt,	17291	+/100.00%	0
1529	20nt,	2036	+/100.00%	0
1530	20nt,	3638	+/100.00%	0
1531	20nt,	6296	+/100.00%	0
1532	20nt,	2816	+/100.00%	0
1533	20nt,	8154	+/100.00%	0
1534	20nt,	7619	+/100.00%	0
1535	20nt,	9597	+/100.00%	0
1536	20nt,	1070	+/100.00%	0
1537	20nt,	1223	+/100.00%	0
1538	20nt,	1223	+/100.00%	0
1539	20nt,	2219	+/100.00%	0
1540	20nt,	2895	+/100.00%	0
1541	20nt,	3026	+/100.00%	0
1542	20nt,	1345	+/100.00%	0
1543	20nt,	1970	+/100.00%	0
1544	20nt,	2276	+/100.00%	0
1545	20nt,	1066	+/100.00%	0
1546	20nt,	1215	+/100.00%	0
1547	20nt,	1428	+/100.00%	0
1548	20nt,	2568	+/100.00%	0
1549	20nt,	6540	+/100.00%	0
1550	20nt,	1293	+/100.00%	0
1551	20nt,	1648	+/100.00%	0
1552	20nt,	2100	+/100.00%	0
1553	20nt,	2482	+/100.00%	0
1554	20nt,	1068	+/100.00%	0
1555	20nt,	1151	+/100.00%	0
1556	20nt,	1301	+/100.00%	0
1557	20nt,	1037	+/100.00%	0
1558	20nt,	1552	+/100.00%	0
1559	20nt,	2501	+/100.00%	0
1560	20nt,	3086	+/100.00%	0
1561	20nt,	3760	+/100.00%	0
1562	20nt,	2023	+/100.00%	0
1563	20nt,	2095	+/100.00%	0
1564	20nt,	4214	+/100.00%	0
1565	20nt,	8364	+/100.00%	0
1566	20nt,	13504	+/100.00%	0
1567	20nt,	18140	+/100.00%	0
1568	20nt,	24315	+/100.00%	0
1569	20nt,	41656	+/100.00%	0
1570	20nt,	59748	+/100.00%	0
1571	20nt,	63396	+/100.00%	0
1572	20nt,	1880	+/100.00%	0
1573	20nt,	3499	+/100.00%	0
1574	20nt,	3757	+/100.00%	0
1575	20nt,	4817	+/100.00%	0
1576	20nt,	1245	+/100.00%	0
1577	20nt,	13772	+/100.00%	0
1578	20nt,	12232	+/100.00%	0
1579	20nt,	8233	+/100.00%	0
1580	20nt,	4504	+/100.00%	0
1581	20nt,	4059	+/100.00%	0
1582	20nt,	2576	+/100.00%	0
1583	20nt,	1607	+/100.00%	0
1584	20nt,	1052	+/100.00%	0
1585	20nt,	7385	+/100.00%	0
1586	20nt,	6755	+/100.00%	0
1587	20nt,	4741	+/100.00%	0
1588	20nt,	2572	+/100.00%	0
1589	20nt,	2150	+/100.00%	0
1590	20nt,	1505	+/100.00%	0
1591	20nt,	1028	+/100.00%	0
1592	20nt,	1219	+/100.00%	0
1593	20nt,	1317	+/100.00%	0
1594	20nt,	1366	+/100.00%	0
1595	20nt,	1393	+/100.00%	0
1596	20nt,	5700	+/100.00%	0
1597	20nt,	1669	+/100.00%	0
1598	20nt,	2218	+/100.00%	0
1599	20nt,	2457	+/100.00%	0
1600	20nt,	2739	+/100.00%	0
1601	20nt,	2906	+/100.00%	0
1602	20nt,	3220	+/100.00%	0
1603	20nt,	3962	+/100.00%	0
1604	20nt,	4081	+/100.00%	0
1605	20nt,	498968	+/100.00%	0
1606	20nt,	1153	+/100.00%	0
1607	20nt,	10050	+/100.00%	0
1608	20nt,	1978	+/100.00%	0
1609	20nt,	1031	+/100.00%	0
1610	20nt,	1037	+/100.00%	0
1611	20nt,	1104	+/100.00%	0
1612	20nt,	1112	+/100.00%	0
1613	20nt,	1149	+/100.00%	0
1614	20nt,	1194	+/100.00%	0
1615	20nt,	1204	+/100.00%	0
1616	20nt,	1296	+/100.00%	0
1617	20nt,	1436	+/100.00%	0
1618	20nt,	1473	+/100.00%	0
1619	20nt,	1582	+/100.00%	0
1620	20nt,	1654	+/100.00%	0
1621	20nt,	2372	+/100.00%	0
1622	20nt,	3120	+/100.00%	0
1623	20nt,	1771	+/100.00%	0
1624	20nt,	2525	+/100.00%	0
1625	20nt,	3303	+/100.00%	0
1626	20nt,	3528	+/100.00%	0
1627	20nt,	4283	+/100.00%	0
1628	20nt,	4444	+/100.00%	0
1629	20nt,	4609	+/100.00%	0
1630	20nt,	4834	+/100.00%	0
1631	20nt,	5544	+/100.00%	0
1632	20nt,	7708	+/100.00%	0
1633	20nt,	8834	+/100.00%	0
1634	20nt,	9314	+/100.00%	0
1635	20nt,	9422	+/100.00%	0
1636	20nt,	10520	+/100.00%	0
1637	20nt,	13327	+/100.00%	0
1638	20nt,	13731	+/100.00%	0
1639	20nt,	1712589	+/100.00%	0
1640	20nt,	1986	+/100.00%	0
1641	20nt,	2108	+/100.00%	0
1642	20nt,	2628	+/100.00%	0
1643	20nt,	2914	+/100.00%	0
1644	20nt,	3844	+/100.00%	0
1645	20nt,	2178	+/100.00%	0
1646	20nt,	2487	+/100.00%	0
1647	20nt,	2556	+/100.00%	0
1648	20nt,	2906	+/100.00%	0
1649	20nt,	3054	+/100.00%	0
1650	20nt,	3065	+/100.00%	0
1651	20nt,	3240	+/100.00%	0
1652	20nt,	3352	+/100.00%	0
1653	20nt,	3427	+/100.00%	0
1654	20nt,	3946	+/100.00%	0
1655	20nt,	4285	+/100.00%	0
1656	20nt,	2159	+/100.00%	0
1657	20nt,	2173	+/100.00%	0
1658	20nt,	2367	+/100.00%	0
1659	20nt,	2430	+/100.00%	0
1660	20nt,	2784	+/100.00%	0
1661	20nt,	3167	+/100.00%	0
1662	20nt,	4136	+/100.00%	0
1663	20nt,	4454	+/100.00%	0
1664	20nt,	4512	+/100.00%	0
1665	20nt,	4576	+/100.00%	0
1666	20nt,	5218	+/100.00%	0
1667	20nt,	5356	+/100.00%	0
1668	20nt,	5603	+/100.00%	0
1669	20nt,	5640	+/100.00%	0
1670	20nt,	6185	+/100.00%	0
1671	20nt,	6682	+/100.00%	0
1672	20nt,	8049	+/100.00%	0
1673	20nt,	8142	+/100.00%	0
1674	20nt,	8148	+/100.00%	0
1675	20nt,	8395	+/100.00%	0
1676	20nt,	8463	+/100.00%	0
1677	20nt,	9645	+/100.00%	0
1678	20nt,	12141	+/100.00%	0
1679	20nt,	12353	+/100.00%	0
1680	20nt,	1537481	+/100.00%	0
1681	20nt,	1021622	+/100.00%	0
1682	20nt,	561295	+/100.00%	0
1683	20nt,	311961	+/100.00%	0
1684	20nt,	192354	+/100.00%	0
1685	20nt,	99160	+/100.00%	0
1686	20nt,	48808	+/100.00%	0
1687	20nt,	23833	+/100.00%	0
1688	20nt,	12166	+/100.00%	0
1689	20nt,	6223	+/100.00%	0
1690	20nt,	3088	+/100.00%	0
1691	20nt,	1631	+/100.00%	0
Cluster 8				6510	0.0465893
0	20nt,	2775		0
1	20nt,	2601	+/100.00%	0
2	20nt,	1134	+/100.00%	0
Cluster 9				1321	0.00945384
0	20nt,	1321		0
Cluster 10				1316	0.00941806
0	20nt,	1316		0
Cluster 11				1299	0.0092964
0	20nt,	1299		0
Cluster 12				25413	0.18187
0	20nt,	1070		0
1	20nt,	1904	+/100.00%	0
2	20nt,	1236	+/100.00%	0
3	20nt,	1170	+/100.00%	0
4	20nt,	1013	+/100.00%	0
5	20nt,	5645	+/100.00%	0
6	20nt,	5035	+/100.00%	0
7	20nt,	3448	+/100.00%	0
8	20nt,	1983	+/100.00%	0
9	20nt,	1866	+/100.00%	0
10	20nt,	1043	+/100.00%	0
Cluster 13				32596	0.233276
0	20nt,	1031		0
1	20nt,	8054	+/100.00%	0
2	20nt,	7737	+/100.00%	0
3	20nt,	5022	+/100.00%	0
4	20nt,	3003	+/100.00%	0
5	20nt,	2494	+/100.00%	0
6	20nt,	1640	+/100.00%	0
7	20nt,	1106	+/100.00%	0
8	20nt,	1488	+/100.00%	0
9	20nt,	1021	+/100.00%	0
Cluster 14				46473	0.332588
0	20nt,	1187		0
1	20nt,	12058	+/100.00%	0
2	20nt,	10703	+/100.00%	0
3	20nt,	7254	+/100.00%	0
4	20nt,	4079	+/100.00%	0
5	20nt,	3513	+/100.00%	0
6	20nt,	2233	+/100.00%	0
7	20nt,	1434	+/100.00%	0
8	20nt,	1787	+/100.00%	0
9	20nt,	1196	+/100.00%	0
10	20nt,	1029	+/100.00%	0
Cluster 15				7639	0.0546691
0	20nt,	3089		0
1	20nt,	2725	+/100.00%	0
2	20nt,	1825	+/100.00%	0
Cluster 16				16031	0.114727
0	20nt,	1190		0
1	20nt,	4340	+/100.00%	0
2	20nt,	4329	+/100.00%	0
3	20nt,	3123	+/100.00%	0
4	20nt,	1725	+/100.00%	0
5	20nt,	1324	+/100.00%	0
Cluster 17				52144	0.373173
0	20nt,	2061		0
1	20nt,	1492	+/100.00%	0
2	20nt,	1205	+/100.00%	0
3	20nt,	1249	+/100.00%	0
4	20nt,	13163	+/100.00%	0
5	20nt,	11911	+/100.00%	0
6	20nt,	7852	+/100.00%	0
7	20nt,	4325	+/100.00%	0
8	20nt,	3882	+/100.00%	0
9	20nt,	2372	+/100.00%	0
10	20nt,	1557	+/100.00%	0
11	20nt,	1075	+/100.00%	0
Cluster 18				27098	0.193929
0	20nt,	1200		0
1	20nt,	7618	+/100.00%	0
2	20nt,	6960	+/100.00%	0
3	20nt,	4716	+/100.00%	0
4	20nt,	2687	+/100.00%	0
5	20nt,	2357	+/100.00%	0
6	20nt,	1560	+/100.00%	0
Cluster 19				16201	0.115944
0	20nt,	1357		0
1	20nt,	4835	+/100.00%	0
2	20nt,	4186	+/100.00%	0
3	20nt,	2761	+/100.00%	0
4	20nt,	1672	+/100.00%	0
5	20nt,	1390	+/100.00%	0
Cluster 20				161879	1.1585
0	20nt,	2417		0
1	20nt,	1795	+/100.00%	0
2	20nt,	1176	+/100.00%	0
3	20nt,	6247	+/100.00%	0
4	20nt,	4474	+/100.00%	0
5	20nt,	3661	+/100.00%	0
6	20nt,	2175	+/100.00%	0
7	20nt,	1136	+/100.00%	0
8	20nt,	1581	+/100.00%	0
9	20nt,	1202	+/100.00%	0
10	20nt,	2149	+/100.00%	0
11	20nt,	1483	+/100.00%	0
12	20nt,	1101	+/100.00%	0
13	20nt,	1061	+/100.00%	0
14	20nt,	1013	+/100.00%	0
15	20nt,	1220	+/100.00%	0
16	20nt,	1556	+/100.00%	0
17	20nt,	1385	+/100.00%	0
18	20nt,	1008	+/100.00%	0
19	20nt,	1320	+/100.00%	0
20	20nt,	1464	+/100.00%	0
21	20nt,	3054	+/100.00%	0
22	20nt,	4951	+/100.00%	0
23	20nt,	9917	+/100.00%	0
24	20nt,	11066	+/100.00%	0
25	20nt,	18672	+/100.00%	0
26	20nt,	29735	+/100.00%	0
27	20nt,	34798	+/100.00%	0
28	20nt,	3175	+/100.00%	0
29	20nt,	2729	+/100.00%	0
30	20nt,	2144	+/100.00%	0
31	20nt,	1014	+/100.00%	0
Cluster 21				32622	0.233462
0	20nt,	1720		0
1	20nt,	1274	+/100.00%	0
2	20nt,	10001	+/100.00%	0
3	20nt,	7726	+/100.00%	0
4	20nt,	4665	+/100.00%	0
5	20nt,	3574	+/100.00%	0
6	20nt,	2393	+/100.00%	0
7	20nt,	1269	+/100.00%	0
Cluster 22				33940	0.242894
0	20nt,	1553		0
1	20nt,	1188	+/100.00%	0
2	20nt,	1081	+/100.00%	0
3	20nt,	9723	+/100.00%	0
4	20nt,	7854	+/100.00%	0
5	20nt,	4482	+/100.00%	0
6	20nt,	3674	+/100.00%	0
7	20nt,	2153	+/100.00%	0
8	20nt,	1158	+/100.00%	0
9	20nt,	1074	+/100.00%	0
Cluster 23				30664	0.219449
0	20nt,	1347		0
1	20nt,	1018	+/100.00%	0
2	20nt,	9668	+/100.00%	0
3	20nt,	7414	+/100.00%	0
4	20nt,	4420	+/100.00%	0
5	20nt,	3490	+/100.00%	0
6	20nt,	2208	+/100.00%	0
7	20nt,	1099	+/100.00%	0
Cluster 24				52959	0.379005
0	20nt,	1212		0
1	20nt,	15770	+/100.00%	0
2	20nt,	13606	+/100.00%	0
3	20nt,	8760	+/100.00%	0
4	20nt,	5146	+/100.00%	0
5	20nt,	4648	+/100.00%	0
6	20nt,	2400	+/100.00%	0
7	20nt,	1417	+/100.00%	0
Cluster 25				36213	0.259161
0	20nt,	1948		0
1	20nt,	1466	+/100.00%	0
2	20nt,	1319	+/100.00%	0
3	20nt,	8381	+/100.00%	0
4	20nt,	7941	+/100.00%	0
5	20nt,	5359	+/100.00%	0
6	20nt,	3157	+/100.00%	0
7	20nt,	2483	+/100.00%	0
8	20nt,	1888	+/100.00%	0
9	20nt,	1175	+/100.00%	0
10	20nt,	1096	+/100.00%	0
Cluster 26				76512	0.547564
0	20nt,	2752		0
1	20nt,	1992	+/100.00%	0
2	20nt,	1383	+/100.00%	0
3	20nt,	1092	+/100.00%	0
4	20nt,	1071	+/100.00%	0
5	20nt,	1191	+/100.00%	0
6	20nt,	1000	+/100.00%	0
7	20nt,	1087	+/100.00%	0
8	20nt,	17312	+/100.00%	0
9	20nt,	15993	+/100.00%	0
10	20nt,	10874	+/100.00%	0
11	20nt,	6161	+/100.00%	0
12	20nt,	5093	+/100.00%	0
13	20nt,	3386	+/100.00%	0
14	20nt,	2134	+/100.00%	0
15	20nt,	1203	+/100.00%	0
16	20nt,	1529	+/100.00%	0
17	20nt,	1259	+/100.00%	0
Cluster 27				46550	0.333139
0	20nt,	1365		0
1	20nt,	1075	+/100.00%	0
2	20nt,	1092	+/100.00%	0
3	20nt,	11825	+/100.00%	0
4	20nt,	10961	+/100.00%	0
5	20nt,	7743	+/100.00%	0
6	20nt,	4536	+/100.00%	0
7	20nt,	3757	+/100.00%	0
8	20nt,	2565	+/100.00%	0
9	20nt,	1631	+/100.00%	0
Cluster 28				1132	0.00810125
0	20nt,	1132		0
Cluster 29				60488	0.432887
0	20nt,	1151		0
1	20nt,	1006	+/100.00%	0
2	20nt,	2371	+/100.00%	0
3	20nt,	1577	+/100.00%	0
4	20nt,	1501	+/100.00%	0
5	20nt,	16590	+/100.00%	0
6	20nt,	13805	+/100.00%	0
7	20nt,	8562	+/100.00%	0
8	20nt,	5550	+/100.00%	0
9	20nt,	4517	+/100.00%	0
10	20nt,	2397	+/100.00%	0
11	20nt,	1461	+/100.00%	0
Cluster 30				86167	0.616661
0	20nt,	1001		0
1	20nt,	1545	+/100.00%	0
2	20nt,	1096	+/100.00%	0
3	20nt,	1327	+/100.00%	0
4	20nt,	1189	+/100.00%	0
5	20nt,	1044	+/100.00%	0
6	20nt,	3285	+/100.00%	0
7	20nt,	2182	+/100.00%	0
8	20nt,	1772	+/100.00%	0
9	20nt,	1147	+/100.00%	0
10	20nt,	1477	+/100.00%	0
11	20nt,	18858	+/100.00%	0
12	20nt,	16528	+/100.00%	0
13	20nt,	10992	+/100.00%	0
14	20nt,	6269	+/100.00%	0
15	20nt,	5787	+/100.00%	0
16	20nt,	3418	+/100.00%	0
17	20nt,	2086	+/100.00%	0
18	20nt,	1092	+/100.00%	0
19	20nt,	2207	+/100.00%	0
20	20nt,	1865	+/100.00%	0
Cluster 31				2719	0.0194587
0	20nt,	1509		0
1	20nt,	1210	+/100.00%	0
Cluster 32				3433	0.0245685
0	20nt,	1880		0
1	20nt,	1553	+/100.00%	0
Cluster 33				8300	0.0593996
0	20nt,	3156		0
1	20nt,	2546	+/100.00%	0
2	20nt,	1491	+/100.00%	0
3	20nt,	1107	+/100.00%	0
Cluster 34				7886	0.0564368
0	20nt,	2996		0
1	20nt,	2419	+/100.00%	0
2	20nt,	1442	+/100.00%	0
3	20nt,	1029	+/100.00%	0
Cluster 35				7945	0.056859
0	20nt,	2754		0
1	20nt,	2534	+/100.00%	0
2	20nt,	1634	+/100.00%	0
3	20nt,	1023	+/100.00%	0
Cluster 36				6073	0.0434619
0	20nt,	2722		0
1	20nt,	2070	+/100.00%	0
2	20nt,	1281	+/100.00%	0
Cluster 37				5027	0.0359761
0	20nt,	2130		0
1	20nt,	1794	+/100.00%	0
2	20nt,	1103	+/100.00%	0
Cluster 38				5589	0.0399981
0	20nt,	2286		0
1	20nt,	1943	+/100.00%	0
2	20nt,	1360	+/100.00%	0
Cluster 39				5811	0.0415869
0	20nt,	2355		0
1	20nt,	2033	+/100.00%	0
2	20nt,	1423	+/100.00%	0
Cluster 40				13493	0.0965637
[truncated: 68 more rows]

## Sheet: R8
Cluster 0				17250	0.110703	Cluster % Total	Reads
0	23nt,	3746	+/100.00%	0		100	15582221						1268		1268	CCGCACGAAGTAGGGTCAGC
1	23nt,	2631	+/100.00%	0		Cluster	Representation	Representative	Sequence	Alt Sequence 1	Alt Sequence 2	Alt Sequence 3	CCGCACGAAGTAGGGTCAGC		8034	CCGCACAAAATATCGCCAAC
2	24nt,	1388		0		0	0.110703	1388	CCGCACAAAAAAAATAGCGCCAAC				8034		1373	CCGCACGAAATATCGCCAAC
3	23nt,	1319	+/100.00%	0		1	0.340587	1119	CCGCACAAAAAATAGCGCCAAC				CCGCACAAAATATCGCCAAC		1189	CCGCACAAAAGAGCGACAGC
4	23nt,	1199	+/100.00%	0		2	0.00764333	1191	CCGCACAAAAAATAGCGCTAAC				1373		1469	CCGCACAGAATAGCGCCAAC
5	23nt,	3003	+/100.00%	0		3	0.00644966	1005	CCGCACAAAAACAAGCGCCAAC				CCGCACGAAATATCGCCAAC		1363	CCGCACGAAATAGAGCCAAC
6	23nt,	2363	+/100.00%	0		4	0.00926055	1443	CCGCACAAAAATGGCGCCATC				1189		1113	CCGCACAAAATTGTGCCACC
7	23nt,	1601	+/100.00%	0		5	0.0161081	1368	CCGCACAAAAATAGCGTCAAC				CCGCACAAAAGAGCGACAGC		1458	CCGCACAAAAGAGCGCCAAC
Cluster 1				53071	0.340587	6	0.783322	4620	CCGCACAAAAATAGCGCCAAC				1469		3267	CCGCACAAAATAGCTCCAAC
0	22nt,	1119		0		7	0.00768183	1197	CCGCACAAAAATAGCGCTAAC				CCGCACAGAATAGCGCCAAC		3135	CCGCACTGAACAGTGCCAAC
1	22nt,	1463	+/100.00%	0		8	0.00921563	1436	CCGCACAAAAAAGGCGCCAAC				1363		2099	CCGCACAAAATAGCGCCAAC
2	22nt,	1392	+/100.00%	0		9	0.0166793	2599	CCGCACAAAAACAGCGCCAGC				CCGCACGAAATAGAGCCAAC		2885	CCGCACAAAATGGCGCCAAC
3	22nt,	9370	+/100.00%	0		10	0.0176098	2744	CCGCACAAAGTAAGCGCCAAC				1113		1655	CCGCACAAAATAGCGCCTAC
4	22nt,	6767	+/100.00%	0		11	0.0445893	2931	CCGCACAAAACAAGCGCCAAC				CCGCACAAAATTGTGCCACC		7117	CCGCACAAAACAGTGCCAAC
5	22nt,	3587	+/100.00%	0		12	0.00724544	1129	CCGCACAAAAAAGCGTCAAC	CCGCACAATATAGCGCCAAC	CCGCACCAAAATAGCGCCAAC		1458		2521	CCGCACAAATTAGCCTCAAC
6	22nt,	3007	+/100.00%	0		13	0.017905	1688	CCGCACAAAAATGGCGCCAAC				CCGCACAAAAGAGCGCCAAC		1105	CCGCACAGAACAGCGCTAAC
7	22nt,	1750	+/100.00%	0		14	0.00813748	1268	CCGCACGAAGTAGGGTCAGC	CCGCACAAACTGGCGCCAAC			3267		1481	CCGCACAGAACACCGCCAAC
8	22nt,	1363	+/100.00%	0		15	0.225719	8034	CCGCACAAAATATCGCCAAC				CCGCACAAAATAGCTCCAAC		1076	CCGCACAAAATTGCGCCAAC
9	22nt,	1058	+/100.00%	0		16	0.00881132	1373	CCGCACGAAATATCGCCAAC				3135		1302	CCGCACAAAATAGCGCCAGC
10	22nt,	8107	+/100.00%	0		17	0.00763049	1189	CCGCACAAAAGAGCGACAGC	CCGCACAGAATGGCGCCAAC	CCGCACAAAATTGCGCATC		CCGCACTGAACAGTGCCAAC		1657	CCGCACAAAATAGCGCCTTC
11	22nt,	6131	+/100.00%	0		18	1.45632	1469	CCGCACAGAATAGCGCCAAC				2099		1211	CCGCACAAAATAACGCCAAC
12	22nt,	4473	+/100.00%	0		19	0.00874715	1363	CCGCACGAAATAGAGCCAAC				CCGCACAAAATAGCGCCAAC		1100	CCGCACAAATTAGCGGCACC
13	22nt,	1939	+/100.00%	0		20	0.054774	1113	CCGCACAAAATTGTGCCACC				2885		1010	CCGCACAAAATAGCGTCAAC
14	22nt,	1545	+/100.00%	0		21	0.898665	1458	CCGCACAAAAGAGCGCCAAC	CCGCACCAAATGGCGCCAAC			CCGCACAAAATGGCGCCAAC		1189	CCGCACAGAATGGCGCCAAC
Cluster 2				1191	0.00764333	22	0.0849622	3267	CCGCACAAAATAGCTCCAAC				1655		1249	CCGCACAGAACGGCGCCAAC
0	22nt,	1191		0		23	0.0295529	3135	CCGCACTGAACAGTGCCAAC				CCGCACAAAATAGCGCCTAC		1066	CCGCACAAAATAGCGCCATC
Cluster 3				1005	0.00644966	24	64.0128	2099	CCGCACAAAATAGCGCCAAC				7117		1954	CCGCACGAAATAGCGCCAAC
0	22nt,	1005		0		25	3.46044	2885	CCGCACAAAATGGCGCCAAC				CCGCACAAAACAGTGCCAAC		1407	CCGCACAAAACGGCGCCAAC
Cluster 4				1443	0.00926055	26	0.10639	1655	CCGCACAAAATAGCGCCTAC				2521		1090	CCGCACGAAACGGCGCCAAC
0	21nt,	1443		0		27	0.163186	7117	CCGCACAAAACAGTGCCAAC				CCGCACAAATTAGCCTCAAC		1215	CCGCACAAAATTGGGCCAAC
Cluster 5				2510	0.0161081	28	0.0161787	2521	CCGCACAAATTAGCCTCAAC				1105		1080	CCGCACAGAGCGCGCCATC
0	21nt,	1368		0		29	0.00709142	1105	CCGCACAGAACAGCGCTAAC	CCGCACAAAATAGCGCCAAT			CCGCACAGAACAGCGCTAAC		3253	CCGCACAAAATAGCACCAAC
1	21nt,	1142	+/100.00%	0		30	0.00950442	1481	CCGCACAGAACACCGCCAAC				1481		1163	CCGCACAGAACAGCGCCAAC
Cluster 6				122059	0.783322	31	0.212896	1076	CCGCACAAAATTGCGCCAAC				CCGCACAGAACACCGCCAAC		5349	CCGCACAGAACGGCGCTACC
0	21nt,	4620		0		32	1.45276	1302	CCGCACAAAATAGCGCCAGC				1076		1583	CCGCACAGAGCGCGCCAAC
1	21nt,	1940	+/100.00%	0		33	0.0234241	1657	CCGCACAAAATAGCGCCTTC				CCGCACAAAATTGCGCCAAC		2350	CCGCACAAAATAGCGCTAAC
2	21nt,	2339	+/100.00%	0		34	0.41154	1211	CCGCACAAAATAACGCCAAC				1302		1889	CCGCACAAAATCGTGCCAAC
3	21nt,	1044	+/100.00%	0		35	0.00705933	1100	CCGCACAAATTAGCGGCACC				CCGCACAAAATAGCGCCAGC		2601	CCGCACAAAATGGCGCCATC
4	21nt,	1173	+/100.00%	0		36	1.09459	1010	CCGCACAAAATAGCGTCAAC				1657		1498	CCGCACAGAATGGCGCCATC
5	21nt,	2198	+/100.00%	0		37	1.63074	1189	CCGCACAAAAGAGCGACAGC	CCGCACAGAATGGCGCCAAC	CCGCACAAAATTGCGCATC		CCGCACAAAATAGCGCCTTC		1443	CCGCACAAAAATGGCGCCATC
6	21nt,	1128	+/100.00%	0		38	0.218756	1249	CCGCACAGAACGGCGCCAAC				1211		1214	CCGCACAAAATCGCGCGACC
7	21nt,	1648	+/100.00%	0		39	2.083	1066	CCGCACAAAATAGCGCCATC	CCGCACGAAACGGCGCCAGC			CCGCACAAAATAACGCCAAC		4786	CCGCACAAAATAGCGCCGAC
8	21nt,	1662	+/100.00%	0		40	1.09963	1954	CCGCACGAAATAGCGCCAAC				1100		1693	CCGCACAGAATAGCGTCAAC
9	21nt,	1715	+/100.00%	0		41	0.156518	1407	CCGCACAAAACGGCGCCAAC				CCGCACAAATTAGCGGCACC		1123	CCGCACAAAATAGCGTCGAC
10	21nt,	2277	+/100.00%	0		42	0.00699515	1090	CCGCACGAAACGGCGCCAAC	CCGCACAAAATAGCTCCATC			1010		1368	CCGCACAAAAATAGCGTCAAC
11	21nt,	2004	+/100.00%	0		43	0.00779735	1215	CCGCACAAAATTGGGCCAAC				CCGCACAAAATAGCGTCAAC		3854	CCGCACAAATGTGCCACC
12	21nt,	1326	+/100.00%	0		44	0.118346	3253	CCGCACAAAATAGCACCAAC				1189		1129	CCGCACAAAAAAGCGTCAAC
13	21nt,	15827	+/100.00%	0		45	0.252191	1163	CCGCACAGAACAGCGCCAAC				CCGCACAGAATGGCGCCAAC		2903	CCGCACAAAATAACGCCACC
14	21nt,	11271	+/100.00%	0		46	0.0435432	5349	CCGCACAGAACGGCGCTACC				1249		1517	CCGCACAAAGTAGCGCCAAC
15	21nt,	6131	+/100.00%	0		47	0.417431	2350	CCGCACAAAATAGCGCTAAC				CCGCACAGAACGGCGCCAAC		1953	CCGCACGAAATGGCGCCAGC
16	21nt,	4931	+/100.00%	0		48	0.0121228	1889	CCGCACAAAATCGTGCCAAC				1066		2375	CCGCACAAAATAGCGCCACC
17	21nt,	3054	+/100.00%	0		49	0.75572	2601	CCGCACAAAATGGCGCCATC				CCGCACAAAATAGCGCCATC		1268	CCGCACAAACTGGCGCCAAC
18	21nt,	1598	+/100.00%	0		50	0.00961352	1498	CCGCACAGAATGGCGCCATC				1954		1020	CCGCACAGAATGGCGCCAGC
19	21nt,	1070	+/100.00%	0		51	0.00779093	1214	CCGCACAAAATCGCGCGACC				CCGCACGAAATAGCGCCAAC		4590	CCGCACAAACTAGCGCCAGC
20	21nt,	1869	+/100.00%	0		52	0.695203	4786	CCGCACAAAATAGCGCCGAC				1407		2935	CCGCACAGAATAGCGCCACC
21	21nt,	1483	+/100.00%	0		53	0.0108649	1693	CCGCACAGAATAGCGTCAAC				CCGCACAAAACGGCGCCAAC		1034	CCGCACTAAATAGTGCCACC
22	21nt,	1050	+/100.00%	0		54	0.00720693	1123	CCGCACAAAATAGCGTCGAC				1090		4481	CCGCACAAATTAGCGCCAAC
23	21nt,	2180	+/100.00%	0		55	0.00724544	1129	CCGCACAAAAAAGCGTCAAC	CCGCACAATATAGCGCCAAC	CCGCACCAAAATAGCGCCAAC		CCGCACGAAACGGCGCCAAC		1306	CCGCACAAAATAGAGCCAAC
24	21nt,	1667	+/100.00%	0		56	0.031414	2903	CCGCACAAAATAACGCCACC				1215		1244	CCGCACAAAACAGCGCCAAC
25	21nt,	15229	+/100.00%	0		57	0.519721	1517	CCGCACAAAGTAGCGCCAAC				CCGCACAAAATTGGGCCAAC		1419	CCGCACAAAAAAGCGCCAAC
26	21nt,	11309	+/100.00%	0		58	0.0125335	1953	CCGCACGAAATGGCGCCAGC				1080		1244	CCGCACAAATTAGCGCCCAC
27	21nt,	8488	+/100.00%	0		59	0.551462	2375	CCGCACAAAATAGCGCCACC				CCGCACAGAGCGCGCCATC		1418	CCGCACAAGATAGCGCCAAC
28	21nt,	3628	+/100.00%	0		60	0.0159412	1268	CCGCACGAAGTAGGGTCAGC	CCGCACAAACTGGCGCCAAC			3253		1412	CCGCACAAAATAGTGCCAAC
29	21nt,	1419	+/100.00%	0		61	0.00654592	1020	CCGCACAGAATGGCGCCAGC				CCGCACAAAATAGCACCAAC		1284	CCGCACCAAATAGCGCCAAC
30	21nt,	1335	+/100.00%	0		62	0.0805084	4590	CCGCACAAACTAGCGCCAGC				1163		5133	CCGCACAAATAGCGCCAAC
31	21nt,	2414	+/100.00%	0		63	0.0368882	2935	CCGCACAGAATAGCGCCACC				CCGCACAGAACAGCGCCAAC		1119	CCGCACAAAAAATAGCGCCAAC
32	21nt,	1032	+/100.00%	0		64	0.576105	1034	CCGCACTAAATAGTGCCACC				5349		4620	CCGCACAAAAATAGCGCCAAC
Cluster 7				1197	0.00768183	65	0.343353	4481	CCGCACAAATTAGCGCCAAC				CCGCACAGAACGGCGCTACC		1049	CCGCACGAAAAAGCGCCAAC
0	21nt,	1197		0		66	0.054267	1306	CCGCACAAAATAGAGCCAAC				1583		1694	CCGCACGAAAAGCGCCAAC
Cluster 8				1436	0.00921563	67	0.228023	1244	CCGCACAAAACAGCGCCAAC	CCGCACAAATTAGCGCCCAC			CCGCACAGAGCGCGCCAAC		1247	CCGCACGAAATGCGCCAAC
0	21nt,	1436		0		68	0.756798	1419	CCGCACAAAAAAGCGCCAAC				2350		1274	CCGCACGAAAACGCGCCAAC
Cluster 9				2599	0.0166793	69	0.00798346	1244	CCGCACAAAACAGCGCCAAC	CCGCACAAATTAGCGCCCAC			CCGCACAAAATAGCGCTAAC		1442	CCGCACAAAATAGCGCAAAC
0	21nt,	2599		0		70	0.00910011	1418	CCGCACAAGATAGCGCCAAC				1889		3655	CCGCACAAAATAGCGGCACC
Cluster 10				2744	0.0176098	71	0.641218	1412	CCGCACAAAATAGTGCCAAC				CCGCACAAAATCGTGCCAAC		1197	CCGCACAAAAATAGCGCTAAC
0	21nt,	2744		0		72	0.0321199	1284	CCGCACCAAATAGCGCCAAC				2601		1191	CCGCACAAAAAATAGCGCTAAC
Cluster 11				6948	0.0445893	73	0.823862	1049	CCGCACGAAAAAGCGCCAAC				CCGCACAAAATGGCGCCATC		1436	CCGCACAAAAAAGGCGCCAAC
0	21nt,	2931		0		74	0.00817598	1274	CCGCACGAAAACGCGCCAAC				1498		1842	CCGCACGAACTAGCGCCAGC
1	21nt,	2706	+/100.00%	0		75	0.706286	1442	CCGCACAAAATAGCGCAAAC				CCGCACAGAATGGCGCCATC		1147	CCGCACAAAATAGCGACAAC
2	21nt,	1311	+/100.00%	0		76	0.0320173	3655	CCGCACAAAATAGCGGCACC				1443		1878	CCGCACAAACTAGCGCCAAC
Cluster 12				1129	0.00724544	77	0.0118212	1842	CCGCACGAACTAGCGCCAGC				CCGCACAAAAATGGCGCCATC		1330	CCGCACAAAATCGCGCCAAC
0	21nt,	1129		0		78	0.208064	1147	CCGCACAAAATAGCGACAAC				1214		1066	CCGCACGAAACGGCGCCAGC
Cluster 13				2790	0.017905	79	0.139422	1878	CCGCACAAACTAGCGCCAAC				CCGCACAAAATCGCGCGACC		3259	CCGCACAAAATGGCGCGAAC
0	21nt,	1688		0		80	0.124007	1330	CCGCACAAAATCGCGCCAAC				4786		3947	CCGCACAAAATGGTGCCATC
1	21nt,	1102	+/100.00%	0		81	0.00684113	1066	CCGCACAAAATAGCGCCATC	CCGCACGAAACGGCGCCAGC			CCGCACAAAATAGCGCCGAC		1045	CCGCACAAAATCGCGCCAGC
Cluster 14				1268	0.00813748	82	0.0485874	3259	CCGCACAAAATGGCGCGAAC				1693		2641	CCGCACAGATTAGCGCCAAC
0	20nt,	1268		0		83	0.0253302	3947	CCGCACAAAATGGTGCCATC				CCGCACAGAATAGCGTCAAC		3627	CCGCACAAACTAACGCCAAC
Cluster 15				35172	0.225719	84	0.0181425	1045	CCGCACAAAATCGCGCCAGC				1123		1104	CCGCACAAAGCGCGCCAAC
0	20nt,	8034		0		85	0.0169488	2641	CCGCACAGATTAGCGCCAAC				CCGCACAAAATAGCGTCGAC		3658	CCGCACAAAAGAGCGCCGAC
1	20nt,	1192	+/100.00%	0		86	0.0232765	3627	CCGCACAAACTAACGCCAAC				1368		1653	CCGCACAAAGTAGCGCCAGC
2	20nt,	1009	+/100.00%	0		87	0.0889796	3658	CCGCACAAAAGAGCGCCGAC				CCGCACAAAAATAGCGTCAAC		2227	CCGCACAAAATGGCGCCAGC
3	20nt,	1072	+/100.00%	0		88	0.0106082	1653	CCGCACAAAGTAGCGCCAGC				3854		1196	CCGCACAAAATAGCGCGAAC
4	20nt,	1722	+/100.00%	0		89	0.0914375	2227	CCGCACAAAATGGCGCCAGC				CCGCACAAATGTGCCACC		1505	CCGCACAAGTAGCGCCAAC
5	20nt,	4895	+/100.00%	0		90	0.0711324	1196	CCGCACAAAATAGCGCGAAC				1129		5397	CCGCACAAAACAACGCCAAC
6	20nt,	3953	+/100.00%	0		91	0.0346356	5397	CCGCACAAAACAACGCCAAC				CCGCACAAAAAAGCGTCAAC		2400	CCGCACAAAACAGCGCCAGC
7	20nt,	2390	+/100.00%	0		92	1.56209	2400	CCGCACAAAACAGCGCCAGC				2903		1984	CCGCACAAAACAGCACCAGC
8	20nt,	4071	+/100.00%	0		93	0.0127325	1984	CCGCACAAAACAGCACCAGC				CCGCACAAAATAACGCCACC		1421	CCGCACGAAACAGCGCCAGC
9	20nt,	2919	+/100.00%	0		94	0.00911937	1421	CCGCACGAAACAGCGCCAGC				1517		1324	CCGCACAAAACTGCGCCAGC
10	20nt,	1518	+/100.00%	0		95	0.00849686	1324	CCGCACAAAACTGCGCCAGC				CCGCACAAAGTAGCGCCAAC		10900	CCGCACAGAACAGCGCCAGC
11	20nt,	1329	+/100.00%	0		96	0.122967	10900	CCGCACAGAACAGCGCCAGC				1953		2599	CCGCACAAAAACAGCGCCAGC
12	20nt,	1068	+/100.00%	0		97	0.185025	1129	CCGCACAAAAAAGCGTCAAC	CCGCACAATATAGCGCCAAC	CCGCACCAAAATAGCGCCAAC		CCGCACGAAATGGCGCCAGC		1129	CCGCACAATATAGCGCCAAC
Cluster 16				1373	0.00881132	98	0.00842627	1313	CCGCACTAAATAGCGCAAAC				2375		1313	CCGCACTAAATAGCGCAAAC
0	20nt,	1373		0		99	0.0558842	3108	CCGCACACAATAGCGCCAAC				CCGCACAAAATAGCGCCACC		3108	CCGCACACAATAGCGCCAAC
Cluster 17				1189	0.00763049	100	0.010159	1583	CCGCACAGAGCGCGCCAAC	CCGCACAGAACAGCGCCCAC			1268		1583	CCGCACAGAACAGCGCCCAC
0	20nt,	1189		0		101	0.0277111	2552	CCGCACAAAATAGCGCAACC				CCGCACAAACTGGCGCCAAC		2744	CCGCACAAAGTAAGCGCCAAC
Cluster 18				226927	1.45632	102	0.118019	3988	CCGCACAGAATAGCGCCAGC				1020		2552	CCGCACAAAATAGCGCAACC
0	20nt,	1469		0		103	0.0705676	1232	CCGCACAAAAAAGCGCCAGC				CCGCACAGAATGGCGCCAGC		3988	CCGCACAGAATAGCGCCAGC
1	20nt,	2775	+/100.00%	0		104	0.0658635	1616	CCGCACAAAATAGCGCCCAC				4590		1232	CCGCACAAAAAAGCGCCAGC
2	20nt,	8046	+/100.00%	0		105	0.0170066	1569	CCGCACAGAACGGCGCCATC				CCGCACAAACTAGCGCCAGC		1616	CCGCACAAAATAGCGCCCAC
3	20nt,	1171	+/100.00%	0		106	0.00963277	1501	CCGCACAAAATAGCCCCAAC				2935		1569	CCGCACAGAACGGCGCCATC
4	20nt,	1581	+/100.00%	0		107	0.332757	1379	CCGCACAAACCAGCGACAAC				CCGCACAGAATAGCGCCACC		1012	CCGCACAAATGGCGCCAAC
5	20nt,	1016	+/100.00%	0		108	0.0487158	1325	CCGCACAACATAGCGCCAAC				1034		1388	CCGCACAAAAAAAATAGCGCCAAC
6	20nt,	3123	+/100.00%	0		109	0.887653	2226	CCGCACAAAATAGTGCCACC				CCGCACTAAATAGTGCCACC		1501	CCGCACAAAATAGCCCCAAC
7	20nt,	2217	+/100.00%	0		110	0.00742513	1157	CCGCACAAAAGAGCGTCGAC				4481		1379	CCGCACAAACCAGCGACAAC
8	20nt,	1351	+/100.00%	0		111	0.0700991	5751	CCGCACAAAATCGCGCCACC				CCGCACAAATTAGCGCCAAC		1325	CCGCACAACATAGCGCCAAC
9	20nt,	1307	+/100.00%	0		112	0.00866372	1350	CCGCACAAAATCGCCCCACC				1306		2226	CCGCACAAAATAGTGCCACC
10	20nt,	1777	+/100.00%	0		113	0.0428052	3016	CCGCACAAAACTGCGCCAAC				CCGCACAAAATAGAGCCAAC		1157	CCGCACAAAAGAGCGTCGAC
11	20nt,	12939	+/100.00%	0		114	0.00721335	1124	CCGCACAGAGAAGCGCCAAC				1244		5751	CCGCACAAAATCGCGCCACC
12	20nt,	12385	+/100.00%	0		115	0.00934398	1456	CCGCACAAAATACCGCCAAC				CCGCACAAAACAGCGCCAAC		1350	CCGCACAAAATCGCCCCACC
13	20nt,	5577	+/100.00%	0		116	0.0080348	1252	CCGCACAGAAGAGCGCCAAC				1419		3016	CCGCACAAAACTGCGCCAAC
14	20nt,	1921	+/100.00%	0		117	0.0315488	1973	CCGCACAAAAGAGCGCCCAC				CCGCACAAAAAAGCGCCAAC		1124	CCGCACAGAGAAGCGCCAAC
15	20nt,	1346	+/100.00%	0		118	0.0127838	1992	CCGCACAAAAAAGCGCCACC				1244		1456	CCGCACAAAATACCGCCAAC
16	20nt,	1754	+/100.00%	0		119	0.0102104	1591	CCGCACTAAAAAGCGCCACC				CCGCACAAATTAGCGCCCAC		1252	CCGCACAGAAGAGCGCCAAC
17	20nt,	1709	+/100.00%	0		120	0.0726341	4723	CCGCACAGAATAGCGCGAAC				1418		1973	CCGCACAAAAGAGCGCCCAC
18	20nt,	1715	+/100.00%	0		121	0.0454043	3313	CCGCACAAATTAGCGCCATC				CCGCACAAGATAGCGCCAAC		1992	CCGCACAAAAAAGCGCCACC
19	20nt,	1045	+/100.00%	0		122	4.76223	1686	CCGCACAAACAAGCGCCAAC				1412		1591	CCGCACTAAAAAGCGCCACC
20	20nt,	1111	+/100.00%	0		123	0.00659726	1028	CCGCACAAACATGCGCCAAC				CCGCACAAAATAGTGCCAAC		4723	CCGCACAGAATAGCGCGAAC
21	20nt,	1685	+/100.00%	0		124	0.0797126	1582	CCGCACAAACAAGCGCCGAC				1284		1186	CCGCACAAAATACGCCAAC
22	20nt,	1170	+/100.00%	0		125	0.0635725	1492	CCGCACAAACAGGCGCCAAC				CCGCACCAAATAGCGCCAAC		8052	CCGCACAAATAGCGCCAGC
23	20nt,	1482	+/100.00%	0		126	0.0275635	2318	CCGCACAGACAAGCGCCAAC				5133		3313	CCGCACAAATTAGCGCCATC
24	20nt,	1071	+/100.00%	0		127	0.0202282	1699	CCGCACAAATAAGCGCCAAC	CCGCACAAACAAGCGCTAAC			CCGCACAAATAGCGCCAAC		1686	CCGCACAAACAAGCGCCAAC
25	20nt,	1436	+/100.00%	0		128	0.0216978	1844	CCGCACAAACAAGCGCCAGC				1119		1028	CCGCACAAACATGCGCCAAC
26	20nt,	1305	+/100.00%	0		129	0.0199137	1699	CCGCACAAATAAGCGCCAAC	CCGCACAAACAAGCGCTAAC			CCGCACAAAAAATAGCGCCAAC		1582	CCGCACAAACAAGCGCCGAC
27	20nt,	1057	+/100.00%	0		130	0.0176291	1524	CCGCACAAACAAGTGCCAAC				4620		1492	CCGCACAAACAGGCGCCAAC
28	20nt,	2247	+/100.00%	0		131	0.0167434	1463	CCGCACAAACAAGCGCCTAC				CCGCACAAAAATAGCGCCAAC		2318	CCGCACAGACAAGCGCCAAC
29	20nt,	1963	+/100.00%	0		132	0.0159605	1377	CCGCACGAACAAGCGCCAAC				1049		1699	CCGCACAAATAAGCGCCAAC
30	20nt,	1114	+/100.00%	0		133	0.025651	3997	CCGCACAAAATGGCTCCAAC				CCGCACGAAAAAGCGCCAAC		1844	CCGCACAAACAAGCGCCAGC
31	20nt,	1956	+/100.00%	0		134	0.0539397	8405	CCGCACAAATTAGTGCCAAC				1694		1699	CCGCACAAACAAGCGCTAAC
32	20nt,	1413	+/100.00%	0		135	0.00935682	1458	CCGCACAAAAGAGCGCCAAC	CCGCACCAAATGGCGCCAAC			CCGCACGAAAAGCGCCAAC		1524	CCGCACAAACAAGTGCCAAC
33	20nt,	7751	+/100.00%	0		136	0.00710425	1107	CCGCACAAAATGGCGCTAAC				1247		1463	CCGCACAAACAAGCGCCTAC
34	20nt,	6159	+/100.00%	0		137	0.00669994	1044	CCGCACAAAATAGCGCCTGC				CCGCACGAAATGCGCCAAC		1377	CCGCACGAACAAGCGCCAAC
35	20nt,	3596	+/100.00%	0		138	0.035502	3554	CCGCACAAAATTGTGCCAAC				1274		1773	CCGCACAACAAGCGCCAAC
36	20nt,	2249	+/100.00%	0		139	0.00930548	1450	CCGCACAAAATGGCGCCGAC				CCGCACGAAAACGCGCCAAC		2931	CCGCACAAAACAAGCGCCAAC
37	20nt,	1904	+/100.00%	0		140	0.00741229	1155	CCGCACAAAATAGGGCCAAC				1442		1005	CCGCACAAAAACAAGCGCCAAC
38	20nt,	1285	+/100.00%	0		141	0.0333842	2951	CCGCACAAAATTGCGCCCTC				CCGCACAAAATAGCGCAAAC		1788	CCGCACAAAAGCGCCAAC
39	20nt,	1087	+/100.00%	0		142	0.123468	14023	CCGCACAGAATAGCACCACC				3655		3997	CCGCACAAAATGGCTCCAAC
40	20nt,	11325	+/100.00%	0		143	0.00740588	1154	CCGCACAGAACAGTGTCAAC				CCGCACAAAATAGCGGCACC		8405	CCGCACAAATTAGTGCCAAC
41	20nt,	6789	+/100.00%	0		144	0.0174686	2722	CCGCACAAATTAACGCCAAC				1197		1458	CCGCACCAAATGGCGCCAAC
42	20nt,	6762	+/100.00%	0		145	0.0131303	2046	CCGCACAAGGTAGCGCCAAC				CCGCACAAAAATAGCGCTAAC		1107	CCGCACAAAATGGCGCTAAC
43	20nt,	3109	+/100.00%	0		146	0.0569944	3261	CCGCACAGAAAAGCGCCAAC				1191		1044	CCGCACAAAATAGCGCCTGC
44	20nt,	1201	+/100.00%	0		147	0.0315231	3730	CCGCACAAAAAAGAGCCAAC				CCGCACAAAAAATAGCGCTAAC		1129	CCGCACCAAAATAGCGCCAAC
45	20nt,	1083	+/100.00%	0		148	0.0112243	1749	CCGCACAAAAGAGCGCCTAC				1436		3554	CCGCACAAAATTGTGCCAAC
46	20nt,	2165	+/100.00%	0		149	0.0367534	1621	CCGCACAGAACAGCGCCGAC				CCGCACAAAAAAGGCGCCAAC		1450	CCGCACAAAATGGCGCCGAC
47	20nt,	1165	+/100.00%	0		150	0.00729036	1136	CCGCACAAGATAACGCCAAC				1842		1155	CCGCACAAAATAGGGCCAAC
48	20nt,	21657	+/100.00%	0		151	0.0956025	14897	CCGCACGAAATAACGCCAAC				CCGCACGAACTAGCGCCAGC		1688	CCGCACAAAAATGGCGCCAAC
49	20nt,	1820	+/100.00%	0		152	0.0177253	2762	CCGCACAGAATAACGCCAAC				1147		2951	CCGCACAAAATTGCGCCCTC
50	20nt,	1332	+/100.00%	0		153	0.00699515	1090	CCGCACGAAACGGCGCCAAC	CCGCACAAAATAGCTCCATC			CCGCACAAAATAGCGACAAC		14023	CCGCACAGAATAGCACCACC
51	20nt,	1187	+/100.00%	0		154	0.0527011	1105	CCGCACAGAACAGCGCTAAC	CCGCACAAAATAGCGCCAAT			1878		1154	CCGCACAGAACAGTGTCAAC
52	20nt,	1889	+/100.00%	0		155	0.0308942	2155	CCGCACAAAGGAGCGCCAAC				CCGCACAAACTAGCGCCAAC		2722	CCGCACAAATTAACGCCAAC
53	20nt,	3448	+/100.00%	0		156	0.00693098	1080	CCGCACAGAGCGCGCCATC				1330		2046	CCGCACAAGGTAGCGCCAAC
54	20nt,	1746	+/100.00%	0		157	0.483525	1583	CCGCACAGAGCGCGCCAAC	CCGCACAGAACAGCGCCCAC			CCGCACAAAATCGCGCCAAC		3261	CCGCACAGAAAAGCGCCAAC
55	20nt,	1289	+/100.00%	0		158	0.332276	5133	CCGCACAAATAGCGCCAAC				1066		3730	CCGCACAAAAAAGAGCCAAC
56	20nt,	1056	+/100.00%	0		159	0.14195	1694	CCGCACGAAAAGCGCCAAC				CCGCACGAAACGGCGCCAGC		1749	CCGCACAAAAGAGCGCCTAC
57	20nt,	1165	+/100.00%	0		160	0.00800271	1247	CCGCACGAAATGCGCCAAC				3259		5513	CCGCACAAATTGCGCCAAC
58	20nt,	1013	+/100.00%	0		161	0.007085	1104	CCGCACAAAGCGCGCCAAC				CCGCACAAAATGGCGCGAAC		1621	CCGCACAGAACAGCGCCGAC
59	20nt,	1026	+/100.00%	0		162	0.0166857	1505	CCGCACAAGTAGCGCCAAC				3947		1136	CCGCACAAGATAACGCCAAC
60	20nt,	1187	+/100.00%	0		163	0.00649458	1012	CCGCACAAATGGCGCCAAC				CCGCACAAAATGGTGCCATC		14897	CCGCACGAAATAACGCCAAC
61	20nt,	1782	+/100.00%	0		164	0.00761124	1186	CCGCACAAAATACGCCAAC				1045		2762	CCGCACAGAATAACGCCAAC
62	20nt,	1007	+/100.00%	0		165	0.141815	8052	CCGCACAAATAGCGCCAGC				CCGCACAAAATCGCGCCAGC		1189	CCGCACAAAATTGCGCATC
63	20nt,	1043	+/100.00%	0		166	0.0213898	1773	CCGCACAACAAGCGCCAAC				2641		1090	CCGCACAAAATAGCTCCATC
64	20nt,	2536	+/100.00%	0		167	0.0353801	5513	CCGCACAAATTGCGCCAAC				CCGCACAGATTAGCGCCAAC		1105	CCGCACAAAATAGCGCCAAT
65	20nt,	3759	+/100.00%	0		168	0.00763049	1189	CCGCACAAAAGAGCGACAGC	CCGCACAGAATGGCGCCAAC	CCGCACAAAATTGCGCATC		3627		2155	CCGCACAAAGGAGCGCCAAC
66	20nt,	14839	+/100.00%	0		169	0.0343533	3854	CCGCACAAATGTGCCACC				CCGCACAAACTAACGCCAAC			end
67	20nt,	3031	+/100.00%	0		170	0.0300599	1788	CCGCACAAAAGCGCCAAC				1104
68	20nt,	2280	+/100.00%	0		171	0	#N/A	#N/A				CCGCACAAAGCGCGCCAAC
69	20nt,	2961	+/100.00%	0		172	#N/A	#N/A	#N/A				3658
70	20nt,	1176	+/100.00%	0		173	#N/A	#N/A	#N/A				CCGCACAAAAGAGCGCCGAC
71	20nt,	1212	+/100.00%	0		174	#N/A	#N/A	#N/A				1653
72	20nt,	1186	+/100.00%	0		175	#N/A	#N/A	#N/A				CCGCACAAAGTAGCGCCAGC
73	20nt,	2998	+/100.00%	0		176	#N/A	#N/A	#N/A				2227
74	20nt,	1347	+/100.00%	0		177	#N/A	#N/A	#N/A				CCGCACAAAATGGCGCCAGC
75	20nt,	1338	+/100.00%	0		178	#N/A	#N/A	#N/A				1196
76	20nt,	1753	+/100.00%	0		179	#N/A	#N/A	#N/A				CCGCACAAAATAGCGCGAAC
Cluster 19				1363	0.00874715	180	#N/A	#N/A	#N/A				1505
0	20nt,	1363		0		181	#N/A	#N/A	#N/A				CCGCACAAGTAGCGCCAAC
Cluster 20				8535	0.054774	182	#N/A	#N/A	#N/A				5397
0	20nt,	1113		0		183	#N/A	#N/A	#N/A				CCGCACAAAACAACGCCAAC
1	20nt,	6143	+/100.00%	0		184	#N/A	#N/A	#N/A				2400
2	20nt,	1279	+/100.00%	0		185	#N/A	#N/A	#N/A				CCGCACAAAACAGCGCCAGC
Cluster 21				140032	0.898665	186	#N/A	#N/A	#N/A				1984
0	20nt,	1458		0		187	#N/A	#N/A	#N/A				CCGCACAAAACAGCACCAGC
1	20nt,	1115	+/100.00%	0		188	#N/A	#N/A	#N/A				1421
2	20nt,	4928	+/100.00%	0		189	#N/A	#N/A	#N/A				CCGCACGAAACAGCGCCAGC
3	20nt,	1839	+/100.00%	0		190	#N/A	#N/A	#N/A				1324
4	20nt,	2394	+/100.00%	0		191	#N/A	#N/A	#N/A				CCGCACAAAACTGCGCCAGC
5	20nt,	1843	+/100.00%	0		192	#N/A	#N/A	#N/A				10900
6	20nt,	1189	+/100.00%	0		193	#N/A	#N/A	#N/A				CCGCACAGAACAGCGCCAGC
7	20nt,	1283	+/100.00%	0		194	#N/A	#N/A	#N/A				2599
8	20nt,	2328	+/100.00%	0		195	#N/A	#N/A	#N/A				CCGCACAAAAACAGCGCCAGC
9	20nt,	2280	+/100.00%	0		196	#N/A	#N/A	#N/A				1129
10	20nt,	1164	+/100.00%	0		197	#N/A	#N/A	#N/A				CCGCACAATATAGCGCCAAC
11	20nt,	19146	+/100.00%	0		198	#N/A	#N/A	#N/A				1313
12	20nt,	3716	+/100.00%	0		199	#N/A	#N/A	#N/A				CCGCACTAAATAGCGCAAAC
13	20nt,	1470	+/100.00%	0		200	#N/A	#N/A	#N/A				3108
14	20nt,	1303	+/100.00%	0									CCGCACACAATAGCGCCAAC
15	20nt,	1016	+/100.00%	0									1583
16	20nt,	1116	+/100.00%	0									CCGCACAGAACAGCGCCCAC
17	20nt,	2702	+/100.00%	0									2744
18	20nt,	2043	+/100.00%	0									CCGCACAAAGTAAGCGCCAAC
19	20nt,	1167	+/100.00%	0									2552
20	20nt,	1124	+/100.00%	0									CCGCACAAAATAGCGCAACC
21	20nt,	6999	+/100.00%	0									3988
22	20nt,	1597	+/100.00%	0									CCGCACAGAATAGCGCCAGC
23	20nt,	1294	+/100.00%	0									1232
24	20nt,	1754	+/100.00%	0									CCGCACAAAAAAGCGCCAGC
25	20nt,	1644	+/100.00%	0									1616
26	20nt,	1682	+/100.00%	0									CCGCACAAAATAGCGCCCAC
27	20nt,	1416	+/100.00%	0									1569
28	20nt,	1571	+/100.00%	0									CCGCACAGAACGGCGCCATC
29	20nt,	2914	+/100.00%	0									1012
30	20nt,	5228	+/100.00%	0									CCGCACAAATGGCGCCAAC
31	20nt,	7092	+/100.00%	0									1388
32	20nt,	1677	+/100.00%	0									CCGCACAAAAAAAATAGCGCCAAC
33	20nt,	2855	+/100.00%	0									1501
34	20nt,	2031	+/100.00%	0									CCGCACAAAATAGCCCCAAC
35	20nt,	1137	+/100.00%	0									1379
36	20nt,	8937	+/100.00%	0									CCGCACAAACCAGCGACAAC
37	20nt,	5986	+/100.00%	0									1325
38	20nt,	2077	+/100.00%	0									CCGCACAACATAGCGCCAAC
39	20nt,	3390	+/100.00%	0									2226
40	20nt,	2071	+/100.00%	0									CCGCACAAAATAGTGCCACC
41	20nt,	1375	+/100.00%	0									1157
42	20nt,	1743	+/100.00%	0									CCGCACAAAAGAGCGTCGAC
43	20nt,	2566	+/100.00%	0									5751
44	20nt,	3546	+/100.00%	0									CCGCACAAAATCGCGCCACC
45	20nt,	3777	+/100.00%	0									1350
46	20nt,	1523	+/100.00%	0									CCGCACAAAATCGCCCCACC
47	20nt,	1585	+/100.00%	0									3016
48	20nt,	1959	+/100.00%	0									CCGCACAAAACTGCGCCAAC
49	20nt,	1982	+/100.00%	0									1124
Cluster 22				13239	0.0849622								CCGCACAGAGAAGCGCCAAC
0	20nt,	3267		0									1456
1	20nt,	4460	+/100.00%	0									CCGCACAAAATACCGCCAAC
2	20nt,	1659	+/100.00%	0									1252
3	20nt,	1240	+/100.00%	0									CCGCACAGAAGAGCGCCAAC
4	20nt,	1133	+/100.00%	0									1973
5	20nt,	1480	+/100.00%	0									CCGCACAAAAGAGCGCCCAC
Cluster 23				4605	0.0295529								1992
0	20nt,	3135		0									CCGCACAAAAAAGCGCCACC
1	20nt,	1470	+/100.00%	0									1591
Cluster 24				9974613	64.0128								CCGCACTAAAAAGCGCCACC
0	20nt,	2099		0									4723
1	20nt,	2019	+/100.00%	0									CCGCACAGAATAGCGCGAAC
2	20nt,	1561	+/100.00%	0									1186
3	20nt,	3977	+/100.00%	0									CCGCACAAAATACGCCAAC
4	20nt,	2949	+/100.00%	0									8052
5	20nt,	2163	+/100.00%	0									CCGCACAAATAGCGCCAGC
6	20nt,	1124	+/100.00%	0									3313
7	20nt,	10969	+/100.00%	0									CCGCACAAATTAGCGCCATC
8	20nt,	1529	+/100.00%	0									1686
9	20nt,	1700	+/100.00%	0									CCGCACAAACAAGCGCCAAC
10	20nt,	1559	+/100.00%	0									1028
11	20nt,	2047	+/100.00%	0									CCGCACAAACATGCGCCAAC
12	20nt,	8326	+/100.00%	0									1582
13	20nt,	2592	+/100.00%	0									CCGCACAAACAAGCGCCGAC
14	20nt,	1564	+/100.00%	0									1492
15	20nt,	1014	+/100.00%	0									CCGCACAAACAGGCGCCAAC
16	20nt,	1243	+/100.00%	0									2318
17	20nt,	1294	+/100.00%	0									CCGCACAGACAAGCGCCAAC
18	20nt,	1739	+/100.00%	0									1699
19	20nt,	1368	+/100.00%	0									CCGCACAAATAAGCGCCAAC
20	20nt,	1035	+/100.00%	0									1844
21	20nt,	6794	+/100.00%	0									CCGCACAAACAAGCGCCAGC
22	20nt,	3532	+/100.00%	0									1699
23	20nt,	1623	+/100.00%	0									CCGCACAAACAAGCGCTAAC
24	20nt,	3292	+/100.00%	0									1524
25	20nt,	3189	+/100.00%	0									CCGCACAAACAAGTGCCAAC
26	20nt,	1958	+/100.00%	0									1463
27	20nt,	1895	+/100.00%	0									CCGCACAAACAAGCGCCTAC
28	20nt,	1763	+/100.00%	0									1377
29	20nt,	1357	+/100.00%	0									CCGCACGAACAAGCGCCAAC
30	20nt,	2720	+/100.00%	0									1773
31	20nt,	1847	+/100.00%	0									CCGCACAACAAGCGCCAAC
32	20nt,	1535	+/100.00%	0									2931
33	20nt,	1089	+/100.00%	0									CCGCACAAAACAAGCGCCAAC
34	20nt,	6459	+/100.00%	0									1005
35	20nt,	5596	+/100.00%	0									CCGCACAAAAACAAGCGCCAAC
36	20nt,	3230	+/100.00%	0									1788
37	20nt,	1247	+/100.00%	0									CCGCACAAAAGCGCCAAC
38	20nt,	4609	+/100.00%	0									3997
39	20nt,	1332	+/100.00%	0									CCGCACAAAATGGCTCCAAC
40	20nt,	4402	+/100.00%	0									8405
41	20nt,	2473	+/100.00%	0									CCGCACAAATTAGTGCCAAC
42	20nt,	1028	+/100.00%	0									1458
43	20nt,	7827	+/100.00%	0									CCGCACCAAATGGCGCCAAC
44	20nt,	1015	+/100.00%	0									1107
45	20nt,	2391	+/100.00%	0									CCGCACAAAATGGCGCTAAC
46	20nt,	2524	+/100.00%	0									1044
47	20nt,	4643	+/100.00%	0									CCGCACAAAATAGCGCCTGC
48	20nt,	1386	+/100.00%	0									1129
49	20nt,	1209	+/100.00%	0									CCGCACCAAAATAGCGCCAAC
50	20nt,	8882	+/100.00%	0									3554
51	20nt,	1260	+/100.00%	0									CCGCACAAAATTGTGCCAAC
52	20nt,	2128	+/100.00%	0									1450
53	20nt,	2524	+/100.00%	0									CCGCACAAAATGGCGCCGAC
54	20nt,	1225	+/100.00%	0									1155
55	20nt,	5823	+/100.00%	0									CCGCACAAAATAGGGCCAAC
56	20nt,	2181	+/100.00%	0									1688
57	20nt,	1926	+/100.00%	0									CCGCACAAAAATGGCGCCAAC
58	20nt,	2157	+/100.00%	0									2951
59	20nt,	9495	+/100.00%	0									CCGCACAAAATTGCGCCCTC
60	20nt,	1160	+/100.00%	0									14023
61	20nt,	1158	+/100.00%	0									CCGCACAGAATAGCACCACC
62	20nt,	1306	+/100.00%	0									1154
63	20nt,	2908	+/100.00%	0									CCGCACAGAACAGTGTCAAC
64	20nt,	1031	+/100.00%	0									2722
65	20nt,	1191	+/100.00%	0									CCGCACAAATTAACGCCAAC
66	20nt,	1007	+/100.00%	0									2046
67	20nt,	1747	+/100.00%	0									CCGCACAAGGTAGCGCCAAC
68	20nt,	2008	+/100.00%	0									3261
69	20nt,	1699	+/100.00%	0									CCGCACAGAAAAGCGCCAAC
70	20nt,	1297	+/100.00%	0									3730
71	20nt,	1179	+/100.00%	0									CCGCACAAAAAAGAGCCAAC
72	20nt,	2240	+/100.00%	0									1749
73	20nt,	1183	+/100.00%	0									CCGCACAAAAGAGCGCCTAC
74	20nt,	7195	+/100.00%	0									5513
75	20nt,	1058	+/100.00%	0									CCGCACAAATTGCGCCAAC
76	20nt,	6252	+/100.00%	0									1621
77	20nt,	1858	+/100.00%	0									CCGCACAGAACAGCGCCGAC
78	20nt,	5835	+/100.00%	0									1136
79	20nt,	1309	+/100.00%	0									CCGCACAAGATAACGCCAAC
80	20nt,	2879	+/100.00%	0									14897
81	20nt,	1134	+/100.00%	0									CCGCACGAAATAACGCCAAC
82	20nt,	1056	+/100.00%	0									2762
83	20nt,	5062	+/100.00%	0									CCGCACAGAATAACGCCAAC
84	20nt,	1579	+/100.00%	0									1189
85	20nt,	2139	+/100.00%	0									CCGCACAAAATTGCGCATC
86	20nt,	1696	+/100.00%	0									1090
87	20nt,	1216	+/100.00%	0									CCGCACAAAATAGCTCCATC
88	20nt,	8213	+/100.00%	0									1105
89	20nt,	6095	+/100.00%	0									CCGCACAAAATAGCGCCAAT
90	20nt,	5653	+/100.00%	0									2155
91	20nt,	5031	+/100.00%	0									CCGCACAAAGGAGCGCCAAC
92	20nt,	4614	+/100.00%	0									end
93	20nt,	3082	+/100.00%	0
94	20nt,	2893	+/100.00%	0
95	20nt,	2877	+/100.00%	0
96	20nt,	2469	+/100.00%	0
97	20nt,	2342	+/100.00%	0
98	20nt,	2152	+/100.00%	0
99	20nt,	2114	+/100.00%	0
100	20nt,	2099	+/100.00%	0
101	20nt,	2065	+/100.00%	0
102	20nt,	1998	+/100.00%	0
103	20nt,	1658	+/100.00%	0
104	20nt,	1465	+/100.00%	0
105	20nt,	1392	+/100.00%	0
106	20nt,	1370	+/100.00%	0
107	20nt,	1349	+/100.00%	0
108	20nt,	1189	+/100.00%	0
109	20nt,	1158	+/100.00%	0
110	20nt,	1113	+/100.00%	0
111	20nt,	1081	+/100.00%	0
112	20nt,	4930	+/100.00%	0
113	20nt,	3817	+/100.00%	0
114	20nt,	1477	+/100.00%	0
115	20nt,	1019	+/100.00%	0
116	20nt,	9403	+/100.00%	0
117	20nt,	1197	+/100.00%	0
118	20nt,	1025	+/100.00%	0
119	20nt,	21739	+/100.00%	0
120	20nt,	4146	+/100.00%	0
121	20nt,	2126	+/100.00%	0
122	20nt,	10590	+/100.00%	0
123	20nt,	1556	+/100.00%	0
124	20nt,	1311	+/100.00%	0
125	20nt,	1605	+/100.00%	0
126	20nt,	1593	+/100.00%	0
127	20nt,	20273	+/100.00%	0
128	20nt,	3550	+/100.00%	0
129	20nt,	1519	+/100.00%	0
130	20nt,	1193	+/100.00%	0
131	20nt,	1500	+/100.00%	0
132	20nt,	52337	+/100.00%	0
133	20nt,	2739	+/100.00%	0
134	20nt,	1321	+/100.00%	0
135	20nt,	3505	+/100.00%	0
136	20nt,	9294	+/100.00%	0
137	20nt,	25471	+/100.00%	0
138	20nt,	329779	+/100.00%	0
139	20nt,	2069	+/100.00%	0
140	20nt,	1927	+/100.00%	0
141	20nt,	1869	+/100.00%	0
142	20nt,	1736	+/100.00%	0
143	20nt,	1617	+/100.00%	0
144	20nt,	1586	+/100.00%	0
145	20nt,	1372	+/100.00%	0
146	20nt,	1251	+/100.00%	0
147	20nt,	1131	+/100.00%	0
148	20nt,	1089	+/100.00%	0
149	20nt,	1066	+/100.00%	0
150	20nt,	1758	+/100.00%	0
151	20nt,	14969	+/100.00%	0
152	20nt,	2006	+/100.00%	0
153	20nt,	3057	+/100.00%	0
154	20nt,	3607	+/100.00%	0
155	20nt,	5578	+/100.00%	0
156	20nt,	1036	+/100.00%	0
157	20nt,	6700	+/100.00%	0
158	20nt,	1052	+/100.00%	0
159	20nt,	4226	+/100.00%	0
160	20nt,	1271	+/100.00%	0
161	20nt,	1097	+/100.00%	0
162	20nt,	21882	+/100.00%	0
163	20nt,	12203	+/100.00%	0
164	20nt,	10084	+/100.00%	0
165	20nt,	7202	+/100.00%	0
166	20nt,	3763	+/100.00%	0
167	20nt,	1159	+/100.00%	0
168	20nt,	4427	+/100.00%	0
169	20nt,	4364	+/100.00%	0
170	20nt,	1515	+/100.00%	0
171	20nt,	1306	+/100.00%	0
172	20nt,	1169	+/100.00%	0
173	20nt,	1531	+/100.00%	0
174	20nt,	4392	+/100.00%	0
175	20nt,	3799	+/100.00%	0
176	20nt,	1669	+/100.00%	0
177	20nt,	1325	+/100.00%	0
178	20nt,	3579	+/100.00%	0
179	20nt,	3037	+/100.00%	0
180	20nt,	2996	+/100.00%	0
181	20nt,	1780	+/100.00%	0
182	20nt,	1382	+/100.00%	0
183	20nt,	1371	+/100.00%	0
184	20nt,	1288	+/100.00%	0
185	20nt,	1285	+/100.00%	0
186	20nt,	1193	+/100.00%	0
187	20nt,	1155	+/100.00%	0
188	20nt,	2279	+/100.00%	0
189	20nt,	2130	+/100.00%	0
190	20nt,	1906	+/100.00%	0
191	20nt,	6962	+/100.00%	0
192	20nt,	7786	+/100.00%	0
193	20nt,	18015	+/100.00%	0
194	20nt,	31769	+/100.00%	0
195	20nt,	126104	+/100.00%	0
196	20nt,	1055	+/100.00%	0
197	20nt,	1648	+/100.00%	0
198	20nt,	1279	+/100.00%	0
199	20nt,	1221	+/100.00%	0
200	20nt,	3556	+/100.00%	0
201	20nt,	3480	+/100.00%	0
202	20nt,	1145	+/100.00%	0
203	20nt,	1909	+/100.00%	0
204	20nt,	3335	+/100.00%	0
205	20nt,	1013	+/100.00%	0
206	20nt,	3675	+/100.00%	0
207	20nt,	2355	+/100.00%	0
208	20nt,	8323	+/100.00%	0
209	20nt,	1892	+/100.00%	0
210	20nt,	3676	+/100.00%	0
211	20nt,	1463	+/100.00%	0
212	20nt,	2341	+/100.00%	0
213	20nt,	1734	+/100.00%	0
214	20nt,	1308	+/100.00%	0
215	20nt,	1563	+/100.00%	0
216	20nt,	3387	+/100.00%	0
217	20nt,	3134	+/100.00%	0
218	20nt,	1618	+/100.00%	0
219	20nt,	5511	+/100.00%	0
220	20nt,	1301	+/100.00%	0
221	20nt,	1643	+/100.00%	0
222	20nt,	1079	+/100.00%	0
223	20nt,	1082	+/100.00%	0
224	20nt,	1118	+/100.00%	0
225	20nt,	2372	+/100.00%	0
226	20nt,	1467	+/100.00%	0
227	20nt,	1263	+/100.00%	0
228	20nt,	1317	+/100.00%	0
229	20nt,	1208	+/100.00%	0
230	20nt,	2237	+/100.00%	0
231	20nt,	2968	+/100.00%	0
232	20nt,	1151	+/100.00%	0
233	20nt,	1658	+/100.00%	0
234	20nt,	1081	+/100.00%	0
235	20nt,	3814	+/100.00%	0
236	20nt,	1744	+/100.00%	0
237	20nt,	1080	+/100.00%	0
238	20nt,	1549	+/100.00%	0
239	20nt,	2678	+/100.00%	0
240	20nt,	1670	+/100.00%	0
241	20nt,	1265	+/100.00%	0
242	20nt,	1666	+/100.00%	0
243	20nt,	1194	+/100.00%	0
244	20nt,	1009	+/100.00%	0
245	20nt,	1761	+/100.00%	0
246	20nt,	1296	+/100.00%	0
247	20nt,	1257	+/100.00%	0
248	20nt,	1245	+/100.00%	0
249	20nt,	1411	+/100.00%	0
250	20nt,	1017	+/100.00%	0
251	20nt,	1737	+/100.00%	0
252	20nt,	1069	+/100.00%	0
253	20nt,	1921	+/100.00%	0
254	20nt,	1324	+/100.00%	0
255	20nt,	16714	+/100.00%	0
256	20nt,	3142	+/100.00%	0
257	20nt,	1411	+/100.00%	0
258	20nt,	1263	+/100.00%	0
259	20nt,	1434	+/100.00%	0
260	20nt,	12448	+/100.00%	0
261	20nt,	10110	+/100.00%	0
262	20nt,	7046	+/100.00%	0
263	20nt,	2850	+/100.00%	0
264	20nt,	1236	+/100.00%	0
265	20nt,	7504	+/100.00%	0
266	20nt,	5666	+/100.00%	0
267	20nt,	5442	+/100.00%	0
268	20nt,	3620	+/100.00%	0
269	20nt,	3039	+/100.00%	0
270	20nt,	1190	+/100.00%	0
271	20nt,	1119	+/100.00%	0
272	20nt,	4566	+/100.00%	0
273	20nt,	3469	+/100.00%	0
274	20nt,	2771	+/100.00%	0
275	20nt,	1775	+/100.00%	0
276	20nt,	1460	+/100.00%	0
277	20nt,	1404	+/100.00%	0
278	20nt,	3889	+/100.00%	0
279	20nt,	3388	+/100.00%	0
280	20nt,	1147	+/100.00%	0
281	20nt,	1142	+/100.00%	0
282	20nt,	3092	+/100.00%	0
283	20nt,	2549	+/100.00%	0
284	20nt,	2190	+/100.00%	0
285	20nt,	11715	+/100.00%	0
286	20nt,	2449	+/100.00%	0
287	20nt,	1105	+/100.00%	0
288	20nt,	1226	+/100.00%	0
289	20nt,	1175	+/100.00%	0
290	20nt,	1638	+/100.00%	0
291	20nt,	1985	+/100.00%	0
292	20nt,	1993	+/100.00%	0
293	20nt,	1366	+/100.00%	0
294	20nt,	1195	+/100.00%	0
295	20nt,	5253	+/100.00%	0
296	20nt,	2378	+/100.00%	0
297	20nt,	2352	+/100.00%	0
298	20nt,	2402	+/100.00%	0
299	20nt,	1953	+/100.00%	0
300	20nt,	1048	+/100.00%	0
301	20nt,	2144	+/100.00%	0
302	20nt,	1936	+/100.00%	0
303	20nt,	1509	+/100.00%	0
304	20nt,	2378	+/100.00%	0
305	20nt,	1480	+/100.00%	0
306	20nt,	1221	+/100.00%	0
307	20nt,	8933	+/100.00%	0
308	20nt,	2349	+/100.00%	0
309	20nt,	1418	+/100.00%	0
310	20nt,	1104	+/100.00%	0
311	20nt,	1972	+/100.00%	0
312	20nt,	1706	+/100.00%	0
313	20nt,	1043	+/100.00%	0
314	20nt,	14283	+/100.00%	0
315	20nt,	1897	+/100.00%	0
316	20nt,	2697	+/100.00%	0
317	20nt,	1077	+/100.00%	0
318	20nt,	2139	+/100.00%	0
319	20nt,	1863	+/100.00%	0
320	20nt,	1133	+/100.00%	0
321	20nt,	3973	+/100.00%	0
322	20nt,	3095	+/100.00%	0
323	20nt,	1149	+/100.00%	0
324	20nt,	1046	+/100.00%	0
325	20nt,	1099	+/100.00%	0
326	20nt,	2128	+/100.00%	0
327	20nt,	1575	+/100.00%	0
328	20nt,	1009	+/100.00%	0
329	20nt,	26564	+/100.00%	0
330	20nt,	5325	+/100.00%	0
331	20nt,	2865	+/100.00%	0
332	20nt,	1987	+/100.00%	0
333	20nt,	1167	+/100.00%	0
334	20nt,	8058	+/100.00%	0
335	20nt,	1350	+/100.00%	0
336	20nt,	8284	+/100.00%	0
337	20nt,	2044	+/100.00%	0
338	20nt,	8188	+/100.00%	0
339	20nt,	1626	+/100.00%	0
340	20nt,	9781	+/100.00%	0
341	20nt,	8195	+/100.00%	0
342	20nt,	2128	+/100.00%	0
343	20nt,	1074	+/100.00%	0
344	20nt,	23984	+/100.00%	0
345	20nt,	2265	+/100.00%	0
346	20nt,	2115	+/100.00%	0
347	20nt,	1345	+/100.00%	0
348	20nt,	3397	+/100.00%	0
349	20nt,	1214	+/100.00%	0
350	20nt,	2275	+/100.00%	0
351	20nt,	1384	+/100.00%	0
352	20nt,	1163	+/100.00%	0
353	20nt,	1779	+/100.00%	0
354	20nt,	1562	+/100.00%	0
355	20nt,	2262	+/100.00%	0
356	20nt,	1161	+/100.00%	0
357	20nt,	1032	+/100.00%	0
358	20nt,	1737	+/100.00%	0
359	20nt,	5878	+/100.00%	0
360	20nt,	1060	+/100.00%	0
361	20nt,	1089	+/100.00%	0
362	20nt,	2585	+/100.00%	0
363	20nt,	1881	+/100.00%	0
364	20nt,	1253	+/100.00%	0
365	20nt,	1112	+/100.00%	0
366	20nt,	1164	+/100.00%	0
367	20nt,	2270	+/100.00%	0
368	20nt,	1394	+/100.00%	0
369	20nt,	1500	+/100.00%	0
370	20nt,	2843	+/100.00%	0
371	20nt,	1599	+/100.00%	0
372	20nt,	1770	+/100.00%	0
373	20nt,	2704	+/100.00%	0
374	20nt,	1940	+/100.00%	0
375	20nt,	1794	+/100.00%	0
376	20nt,	1658	+/100.00%	0
377	20nt,	1475	+/100.00%	0
378	20nt,	1051	+/100.00%	0
379	20nt,	1854	+/100.00%	0
380	20nt,	1366	+/100.00%	0
381	20nt,	3729	+/100.00%	0
382	20nt,	1151	+/100.00%	0
383	20nt,	1877	+/100.00%	0
384	20nt,	1301	+/100.00%	0
385	20nt,	2950	+/100.00%	0
386	20nt,	2663	+/100.00%	0
387	20nt,	2271	+/100.00%	0
388	20nt,	1770	+/100.00%	0
389	20nt,	1022	+/100.00%	0
390	20nt,	3127	+/100.00%	0
391	20nt,	3048	+/100.00%	0
392	20nt,	2518	+/100.00%	0
393	20nt,	1849	+/100.00%	0
394	20nt,	1055	+/100.00%	0
395	20nt,	1558	+/100.00%	0
396	20nt,	1001	+/100.00%	0
397	20nt,	3876	+/100.00%	0
398	20nt,	1067	+/100.00%	0
399	20nt,	2215	+/100.00%	0
400	20nt,	1186	+/100.00%	0
401	20nt,	1301	+/100.00%	0
402	20nt,	1197	+/100.00%	0
403	20nt,	1309	+/100.00%	0
404	20nt,	2184	+/100.00%	0
405	20nt,	1816	+/100.00%	0
406	20nt,	1042	+/100.00%	0
407	20nt,	1883	+/100.00%	0
408	20nt,	1292	+/100.00%	0
409	20nt,	1150	+/100.00%	0
410	20nt,	1231	+/100.00%	0
411	20nt,	36672	+/100.00%	0
412	20nt,	3524	+/100.00%	0
413	20nt,	2661	+/100.00%	0
414	20nt,	1371	+/100.00%	0
415	20nt,	3320	+/100.00%	0
416	20nt,	1965	+/100.00%	0
417	20nt,	1818	+/100.00%	0
418	20nt,	3051	+/100.00%	0
419	20nt,	2578	+/100.00%	0
420	20nt,	1337	+/100.00%	0
421	20nt,	1928	+/100.00%	0
422	20nt,	2337	+/100.00%	0
423	20nt,	1388	+/100.00%	0
424	20nt,	1538	+/100.00%	0
425	20nt,	1341	+/100.00%	0
426	20nt,	11094	+/100.00%	0
427	20nt,	5371	+/100.00%	0
428	20nt,	4888	+/100.00%	0
429	20nt,	1609	+/100.00%	0
430	20nt,	12767	+/100.00%	0
431	20nt,	11036	+/100.00%	0
432	20nt,	7905	+/100.00%	0
433	20nt,	4683	+/100.00%	0
434	20nt,	2856	+/100.00%	0
435	20nt,	1983	+/100.00%	0
436	20nt,	1436	+/100.00%	0
437	20nt,	1357	+/100.00%	0
438	20nt,	1138	+/100.00%	0
439	20nt,	1465	+/100.00%	0
440	20nt,	2093	+/100.00%	0
441	20nt,	1768	+/100.00%	0
442	20nt,	1299	+/100.00%	0
443	20nt,	1409	+/100.00%	0
444	20nt,	1030	+/100.00%	0
445	20nt,	1967	+/100.00%	0
446	20nt,	1379	+/100.00%	0
447	20nt,	1207	+/100.00%	0
448	20nt,	2585	+/100.00%	0
449	20nt,	1221	+/100.00%	0
450	20nt,	1150	+/100.00%	0
451	20nt,	4459	+/100.00%	0
452	20nt,	3902	+/100.00%	0
453	20nt,	2159	+/100.00%	0
454	20nt,	18966	+/100.00%	0
455	20nt,	4233	+/100.00%	0
456	20nt,	1552	+/100.00%	0
457	20nt,	1244	+/100.00%	0
458	20nt,	1327	+/100.00%	0
459	20nt,	1407	+/100.00%	0
460	20nt,	3283	+/100.00%	0
461	20nt,	6489	+/100.00%	0
462	20nt,	5957	+/100.00%	0
463	20nt,	3428	+/100.00%	0
464	20nt,	1882	+/100.00%	0
465	20nt,	1264	+/100.00%	0
466	20nt,	1059	+/100.00%	0
467	20nt,	1936	+/100.00%	0
468	20nt,	1539	+/100.00%	0
469	20nt,	1168	+/100.00%	0
470	20nt,	1044	+/100.00%	0
471	20nt,	1189	+/100.00%	0
472	20nt,	2290	+/100.00%	0
473	20nt,	3105	+/100.00%	0
474	20nt,	2725	+/100.00%	0
475	20nt,	2111	+/100.00%	0
476	20nt,	1994	+/100.00%	0
477	20nt,	1031	+/100.00%	0
478	20nt,	1583	+/100.00%	0
479	20nt,	1201	+/100.00%	0
480	20nt,	1136	+/100.00%	0
481	20nt,	1101	+/100.00%	0
482	20nt,	2799	+/100.00%	0
483	20nt,	2171	+/100.00%	0
484	20nt,	1466	+/100.00%	0
485	20nt,	1056	+/100.00%	0
486	20nt,	1595	+/100.00%	0
487	20nt,	2748	+/100.00%	0
488	20nt,	4673	+/100.00%	0
489	20nt,	4842	+/100.00%	0
490	20nt,	9353	+/100.00%	0
491	20nt,	14626	+/100.00%	0
492	20nt,	1437	+/100.00%	0
493	20nt,	6235	+/100.00%	0
494	20nt,	6194	+/100.00%	0
495	20nt,	3443	+/100.00%	0
496	20nt,	1497	+/100.00%	0
497	20nt,	1279	+/100.00%	0
498	20nt,	1061	+/100.00%	0
499	20nt,	3058	+/100.00%	0
500	20nt,	2271	+/100.00%	0
501	20nt,	1603	+/100.00%	0
502	20nt,	1956	+/100.00%	0
503	20nt,	2467	+/100.00%	0
504	20nt,	6771	+/100.00%	0
505	20nt,	17591	+/100.00%	0
506	20nt,	32377	+/100.00%	0
507	20nt,	38654	+/100.00%	0
508	20nt,	13460	+/100.00%	0
509	20nt,	9388	+/100.00%	0
510	20nt,	5638	+/100.00%	0
511	20nt,	4592	+/100.00%	0
512	20nt,	1881	+/100.00%	0
513	20nt,	1479	+/100.00%	0
514	20nt,	1196	+/100.00%	0
515	20nt,	8578	+/100.00%	0
516	20nt,	1308	+/100.00%	0
517	20nt,	1693	+/100.00%	0
518	20nt,	1284	+/100.00%	0
519	20nt,	1154	+/100.00%	0
520	20nt,	1099	+/100.00%	0
521	20nt,	1355	+/100.00%	0
522	20nt,	1053	+/100.00%	0
523	20nt,	56356	+/100.00%	0
524	20nt,	9435	+/100.00%	0
525	20nt,	1928	+/100.00%	0
526	20nt,	4870	+/100.00%	0
527	20nt,	4567	+/100.00%	0
528	20nt,	1589	+/100.00%	0
529	20nt,	1146	+/100.00%	0
530	20nt,	2818	+/100.00%	0
531	20nt,	2848	+/100.00%	0
532	20nt,	4532	+/100.00%	0
533	20nt,	3565	+/100.00%	0
534	20nt,	3190	+/100.00%	0
535	20nt,	1995	+/100.00%	0
536	20nt,	1799	+/100.00%	0
537	20nt,	3402	+/100.00%	0
538	20nt,	2936	+/100.00%	0
539	20nt,	2524	+/100.00%	0
540	20nt,	1748	+/100.00%	0
541	20nt,	1286	+/100.00%	0
542	20nt,	6955	+/100.00%	0
543	20nt,	6738	+/100.00%	0
544	20nt,	6602	+/100.00%	0
545	20nt,	4363	+/100.00%	0
546	20nt,	2175	+/100.00%	0
547	20nt,	1338	+/100.00%	0
548	20nt,	1010	+/100.00%	0
549	20nt,	1674	+/100.00%	0
550	20nt,	1090	+/100.00%	0
551	20nt,	5188	+/100.00%	0
552	20nt,	3671	+/100.00%	0
553	20nt,	2134	+/100.00%	0
554	20nt,	1522	+/100.00%	0
555	20nt,	1130	+/100.00%	0
556	20nt,	1203	+/100.00%	0
557	20nt,	7755	+/100.00%	0
558	20nt,	5629	+/100.00%	0
559	20nt,	4080	+/100.00%	0
560	20nt,	1743	+/100.00%	0
561	20nt,	1784	+/100.00%	0
562	20nt,	2298	+/100.00%	0
563	20nt,	1748	+/100.00%	0
564	20nt,	48214	+/100.00%	0
565	20nt,	1179	+/100.00%	0
566	20nt,	1208	+/100.00%	0
567	20nt,	1279	+/100.00%	0
568	20nt,	1153	+/100.00%	0
569	20nt,	1045	+/100.00%	0
570	20nt,	3385	+/100.00%	0
571	20nt,	1724	+/100.00%	0
572	20nt,	1109	+/100.00%	0
573	20nt,	1962	+/100.00%	0
574	20nt,	1819	+/100.00%	0
575	20nt,	2256	+/100.00%	0
576	20nt,	2116	+/100.00%	0
577	20nt,	1106	+/100.00%	0
578	20nt,	1090	+/100.00%	0
579	20nt,	1138	+/100.00%	0
580	20nt,	1493	+/100.00%	0
581	20nt,	1664	+/100.00%	0
582	20nt,	5320	+/100.00%	0
583	20nt,	3944	+/100.00%	0
584	20nt,	2161	+/100.00%	0
585	20nt,	1833	+/100.00%	0
586	20nt,	1322	+/100.00%	0
587	20nt,	3130	+/100.00%	0
588	20nt,	1203	+/100.00%	0
589	20nt,	1026	+/100.00%	0
590	20nt,	9028	+/100.00%	0
591	20nt,	4831	+/100.00%	0
592	20nt,	1008	+/100.00%	0
593	20nt,	1114	+/100.00%	0
594	20nt,	1095	+/100.00%	0
595	20nt,	1089	+/100.00%	0
596	20nt,	1442	+/100.00%	0
597	20nt,	1367	+/100.00%	0
598	20nt,	1873	+/100.00%	0
599	20nt,	1424	+/100.00%	0
600	20nt,	1095	+/100.00%	0
601	20nt,	1036	+/100.00%	0
602	20nt,	1525	+/100.00%	0
603	20nt,	1351	+/100.00%	0
604	20nt,	1154	+/100.00%	0
605	20nt,	3297	+/100.00%	0
606	20nt,	1927	+/100.00%	0
607	20nt,	1010	+/100.00%	0
608	20nt,	1846	+/100.00%	0
609	20nt,	5219	+/100.00%	0
610	20nt,	3596	+/100.00%	0
611	20nt,	3058	+/100.00%	0
612	20nt,	5589	+/100.00%	0
613	20nt,	2005	+/100.00%	0
614	20nt,	1031	+/100.00%	0
615	20nt,	1250	+/100.00%	0
616	20nt,	1106	+/100.00%	0
617	20nt,	4458	+/100.00%	0
618	20nt,	3928	+/100.00%	0
619	20nt,	3471	+/100.00%	0
620	20nt,	2579	+/100.00%	0
621	20nt,	1390	+/100.00%	0
622	20nt,	1038	+/100.00%	0
623	20nt,	3999	+/100.00%	0
624	20nt,	3667	+/100.00%	0
625	20nt,	1961	+/100.00%	0
626	20nt,	1453	+/100.00%	0
627	20nt,	1935	+/100.00%	0
628	20nt,	1660	+/100.00%	0
629	20nt,	1466	+/100.00%	0
630	20nt,	1173	+/100.00%	0
631	20nt,	1078	+/100.00%	0
632	20nt,	1612	+/100.00%	0
633	20nt,	9752	+/100.00%	0
634	20nt,	5823	+/100.00%	0
635	20nt,	3724	+/100.00%	0
636	20nt,	2571	+/100.00%	0
637	20nt,	1265	+/100.00%	0
638	20nt,	22803	+/100.00%	0
639	20nt,	21863	+/100.00%	0
640	20nt,	13828	+/100.00%	0
641	20nt,	9027	+/100.00%	0
642	20nt,	6872	+/100.00%	0
643	20nt,	2695	+/100.00%	0
644	20nt,	1105	+/100.00%	0
645	20nt,	1550	+/100.00%	0
646	20nt,	10430	+/100.00%	0
647	20nt,	1241	+/100.00%	0
648	20nt,	7051	+/100.00%	0
649	20nt,	1489	+/100.00%	0
650	20nt,	2248	+/100.00%	0
651	20nt,	3346	+/100.00%	0
652	20nt,	1919	+/100.00%	0
653	20nt,	1545	+/100.00%	0
654	20nt,	1220	+/100.00%	0
655	20nt,	1838	+/100.00%	0
656	20nt,	2987	+/100.00%	0
657	20nt,	2258	+/100.00%	0
658	20nt,	33749	+/100.00%	0
659	20nt,	14991	+/100.00%	0
660	20nt,	11695	+/100.00%	0
661	20nt,	10988	+/100.00%	0
662	20nt,	7217	+/100.00%	0
663	20nt,	2813	+/100.00%	0
664	20nt,	1096	+/100.00%	0
665	20nt,	1860	+/100.00%	0
666	20nt,	1669	+/100.00%	0
667	20nt,	1417	+/100.00%	0
668	20nt,	1121	+/100.00%	0
669	20nt,	1775	+/100.00%	0
670	20nt,	1995	+/100.00%	0
671	20nt,	5820	+/100.00%	0
672	20nt,	16248	+/100.00%	0
673	20nt,	32744	+/100.00%	0
674	20nt,	45323	+/100.00%	0
675	20nt,	53495	+/100.00%	0
676	20nt,	61004	+/100.00%	0
677	20nt,	1706	+/100.00%	0
678	20nt,	1653	+/100.00%	0
679	20nt,	2087	+/100.00%	0
680	20nt,	2571	+/100.00%	0
681	20nt,	3943	+/100.00%	0
682	20nt,	1818	+/100.00%	0
683	20nt,	3222	+/100.00%	0
684	20nt,	1701	+/100.00%	0
685	20nt,	1431	+/100.00%	0
686	20nt,	3945	+/100.00%	0
687	20nt,	7596	+/100.00%	0
688	20nt,	8860	+/100.00%	0
689	20nt,	11954	+/100.00%	0
690	20nt,	13042	+/100.00%	0
691	20nt,	1506	+/100.00%	0
692	20nt,	1676	+/100.00%	0
693	20nt,	3060	+/100.00%	0
694	20nt,	3395	+/100.00%	0
695	20nt,	4363	+/100.00%	0
696	20nt,	5225	+/100.00%	0
697	20nt,	1356	+/100.00%	0
698	20nt,	1753	+/100.00%	0
699	20nt,	1434	+/100.00%	0
700	20nt,	2706	+/100.00%	0
701	20nt,	3956	+/100.00%	0
702	20nt,	7118	+/100.00%	0
703	20nt,	6487	+/100.00%	0
704	20nt,	6443	+/100.00%	0
705	20nt,	4609	+/100.00%	0
706	20nt,	1866	+/100.00%	0
707	20nt,	1521	+/100.00%	0
708	20nt,	8422	+/100.00%	0
709	20nt,	8314	+/100.00%	0
710	20nt,	3725	+/100.00%	0
711	20nt,	1583	+/100.00%	0
712	20nt,	1478	+/100.00%	0
713	20nt,	1368	+/100.00%	0
714	20nt,	1297	+/100.00%	0
715	20nt,	1174	+/100.00%	0
716	20nt,	1387	+/100.00%	0
717	20nt,	2246	+/100.00%	0
718	20nt,	1506	+/100.00%	0
719	20nt,	1287	+/100.00%	0
720	20nt,	1101	+/100.00%	0
721	20nt,	1813	+/100.00%	0
722	20nt,	1408	+/100.00%	0
723	20nt,	1965	+/100.00%	0
724	20nt,	1639	+/100.00%	0
725	20nt,	1057	+/100.00%	0
726	20nt,	2360	+/100.00%	0
727	20nt,	1366	+/100.00%	0
728	20nt,	1301	+/100.00%	0
729	20nt,	7057	+/100.00%	0
730	20nt,	4844	+/100.00%	0
731	20nt,	2601	+/100.00%	0
732	20nt,	2172	+/100.00%	0
733	20nt,	1332	+/100.00%	0
734	20nt,	1448	+/100.00%	0
735	20nt,	14078	+/100.00%	0
736	20nt,	10658	+/100.00%	0
737	20nt,	6923	+/100.00%	0
738	20nt,	2720	+/100.00%	0
739	20nt,	1014	+/100.00%	0
740	20nt,	1851	+/100.00%	0
741	20nt,	1126	+/100.00%	0
742	20nt,	4250	+/100.00%	0
743	20nt,	3004	+/100.00%	0
744	20nt,	2376	+/100.00%	0
745	20nt,	1011	+/100.00%	0
746	20nt,	2950	+/100.00%	0
747	20nt,	2184	+/100.00%	0
748	20nt,	1512	+/100.00%	0
749	20nt,	1698	+/100.00%	0
750	20nt,	1166	+/100.00%	0
751	20nt,	1346	+/100.00%	0
752	20nt,	1286	+/100.00%	0
753	20nt,	1166	+/100.00%	0
754	20nt,	1743	+/100.00%	0
755	20nt,	1195	+/100.00%	0
756	20nt,	1682	+/100.00%	0
757	20nt,	1238	+/100.00%	0
758	20nt,	1441	+/100.00%	0
759	20nt,	1279	+/100.00%	0
760	20nt,	1202	+/100.00%	0
761	20nt,	1046	+/100.00%	0
762	20nt,	8103	+/100.00%	0
763	20nt,	6312	+/100.00%	0
764	20nt,	4334	+/100.00%	0
765	20nt,	1778	+/100.00%	0
766	20nt,	1192	+/100.00%	0
767	20nt,	2719	+/100.00%	0
768	20nt,	1786	+/100.00%	0
769	20nt,	1438	+/100.00%	0
770	20nt,	5725	+/100.00%	0
771	20nt,	4081	+/100.00%	0
772	20nt,	3059	+/100.00%	0
773	20nt,	1269	+/100.00%	0
774	20nt,	3858	+/100.00%	0
775	20nt,	2832	+/100.00%	0
776	20nt,	1638	+/100.00%	0
777	20nt,	1106	+/100.00%	0
778	20nt,	1130	+/100.00%	0
779	20nt,	1012	+/100.00%	0
780	20nt,	3292	+/100.00%	0
781	20nt,	1978	+/100.00%	0
782	20nt,	1626	+/100.00%	0
783	20nt,	2662	+/100.00%	0
784	20nt,	1591	+/100.00%	0
785	20nt,	1460	+/100.00%	0
786	20nt,	1010	+/100.00%	0
787	20nt,	7930	+/100.00%	0
788	20nt,	5476	+/100.00%	0
789	20nt,	4088	+/100.00%	0
790	20nt,	1816	+/100.00%	0
791	20nt,	1418	+/100.00%	0
792	20nt,	8700	+/100.00%	0
793	20nt,	6469	+/100.00%	0
794	20nt,	4414	+/100.00%	0
795	20nt,	1848	+/100.00%	0
796	20nt,	1889	+/100.00%	0
797	20nt,	1877	+/100.00%	0
798	20nt,	2472	+/100.00%	0
799	20nt,	1081	+/100.00%	0
800	20nt,	4145	+/100.00%	0
801	20nt,	1116	+/100.00%	0
802	20nt,	1358	+/100.00%	0
803	20nt,	1067	+/100.00%	0
804	20nt,	8223	+/100.00%	0
805	20nt,	6820	+/100.00%	0
806	20nt,	4029	+/100.00%	0
807	20nt,	1447	+/100.00%	0
808	20nt,	1395	+/100.00%	0
809	20nt,	2526	+/100.00%	0
810	20nt,	2008	+/100.00%	0
811	20nt,	1123	+/100.00%	0
812	20nt,	3450	+/100.00%	0
813	20nt,	3097	+/100.00%	0
814	20nt,	1778	+/100.00%	0
815	20nt,	1581	+/100.00%	0
816	20nt,	1212	+/100.00%	0
817	20nt,	1369	+/100.00%	0
818	20nt,	1001	+/100.00%	0
819	20nt,	1766	+/100.00%	0
820	20nt,	2430	+/100.00%	0
821	20nt,	4677	+/100.00%	0
822	20nt,	4357	+/100.00%	0
823	20nt,	2620	+/100.00%	0
824	20nt,	1303	+/100.00%	0
825	20nt,	1039	+/100.00%	0
826	20nt,	3376	+/100.00%	0
827	20nt,	2247	+/100.00%	0
828	20nt,	1250	+/100.00%	0
829	20nt,	1069	+/100.00%	0
830	20nt,	1068	+/100.00%	0
831	20nt,	1327	+/100.00%	0
832	20nt,	1077	+/100.00%	0
833	20nt,	1568	+/100.00%	0
834	20nt,	1045	+/100.00%	0
835	20nt,	1198	+/100.00%	0
836	20nt,	1917	+/100.00%	0
837	20nt,	1047	+/100.00%	0
838	20nt,	1227	+/100.00%	0
839	20nt,	1311	+/100.00%	0
840	20nt,	1109	+/100.00%	0
841	20nt,	1053	+/100.00%	0
842	20nt,	1216	+/100.00%	0
843	20nt,	2892	+/100.00%	0
844	20nt,	2176	+/100.00%	0
845	20nt,	1446	+/100.00%	0
846	20nt,	1927	+/100.00%	0
847	20nt,	1289	+/100.00%	0
848	20nt,	1044	+/100.00%	0
849	20nt,	1568	+/100.00%	0
850	20nt,	1089	+/100.00%	0
851	20nt,	5983	+/100.00%	0
852	20nt,	4552	+/100.00%	0
853	20nt,	2948	+/100.00%	0
854	20nt,	1212	+/100.00%	0
855	20nt,	8164	+/100.00%	0
856	20nt,	6213	+/100.00%	0
857	20nt,	4312	+/100.00%	0
858	20nt,	1800	+/100.00%	0
859	20nt,	4412	+/100.00%	0
860	20nt,	3245	+/100.00%	0
861	20nt,	2330	+/100.00%	0
862	20nt,	4342	+/100.00%	0
863	20nt,	3127	+/100.00%	0
864	20nt,	2251	+/100.00%	0
865	20nt,	4054	+/100.00%	0
866	20nt,	2827	+/100.00%	0
867	20nt,	2166	+/100.00%	0
868	20nt,	3970	+/100.00%	0
869	20nt,	2809	+/100.00%	0
870	20nt,	1956	+/100.00%	0
871	20nt,	3019	+/100.00%	0
872	20nt,	2254	+/100.00%	0
873	20nt,	1560	+/100.00%	0
874	20nt,	2013	+/100.00%	0
875	20nt,	1523	+/100.00%	0
876	20nt,	1021	+/100.00%	0
877	20nt,	2257	+/100.00%	0
878	20nt,	1719	+/100.00%	0
879	20nt,	1158	+/100.00%	0
880	20nt,	2291	+/100.00%	0
881	20nt,	1612	+/100.00%	0
882	20nt,	1137	+/100.00%	0
883	20nt,	2311	+/100.00%	0
884	20nt,	1731	+/100.00%	0
885	20nt,	2390	+/100.00%	0
886	20nt,	1735	+/100.00%	0
887	20nt,	1286	+/100.00%	0
888	20nt,	1061	+/100.00%	0
889	20nt,	1579	+/100.00%	0
890	20nt,	1118	+/100.00%	0
891	20nt,	1696	+/100.00%	0
892	20nt,	1306	+/100.00%	0
893	20nt,	1442	+/100.00%	0
894	20nt,	1095	+/100.00%	0
895	20nt,	1740	+/100.00%	0
896	20nt,	1306	+/100.00%	0
897	20nt,	1546	+/100.00%	0
898	20nt,	1076	+/100.00%	0
899	20nt,	1825	+/100.00%	0
900	20nt,	1375	+/100.00%	0
901	20nt,	4328	+/100.00%	0
902	20nt,	1129	+/100.00%	0
903	20nt,	2254	+/100.00%	0
904	20nt,	1564	+/100.00%	0
905	20nt,	2513	+/100.00%	0
906	20nt,	3326	+/100.00%	0
907	20nt,	1274	+/100.00%	0
908	20nt,	3584	+/100.00%	0
909	20nt,	2792	+/100.00%	0
910	20nt,	1993	+/100.00%	0
911	20nt,	1439	+/100.00%	0
912	20nt,	1405	+/100.00%	0
913	20nt,	1349	+/100.00%	0
914	20nt,	1333	+/100.00%	0
915	20nt,	1158	+/100.00%	0
916	20nt,	1075	+/100.00%	0
917	20nt,	1052	+/100.00%	0
918	20nt,	1501	+/100.00%	0
919	20nt,	11814	+/100.00%	0
920	20nt,	8315	+/100.00%	0
921	20nt,	4382	+/100.00%	0
922	20nt,	3671	+/100.00%	0
923	20nt,	1943	+/100.00%	0
924	20nt,	1096	+/100.00%	0
925	20nt,	2478	+/100.00%	0
926	20nt,	2205	+/100.00%	0
927	20nt,	4008	+/100.00%	0
928	20nt,	3384	+/100.00%	0
929	20nt,	2413	+/100.00%	0
930	20nt,	1309	+/100.00%	0
931	20nt,	1207	+/100.00%	0
932	20nt,	1086	+/100.00%	0
933	20nt,	10427	+/100.00%	0
934	20nt,	9075	+/100.00%	0
935	20nt,	3364	+/100.00%	0
936	20nt,	1164	+/100.00%	0
937	20nt,	1863	+/100.00%	0
938	20nt,	4896	+/100.00%	0
939	20nt,	3243	+/100.00%	0
940	20nt,	1781	+/100.00%	0
941	20nt,	1579	+/100.00%	0
942	20nt,	4442	+/100.00%	0
943	20nt,	3193	+/100.00%	0
944	20nt,	1739	+/100.00%	0
945	20nt,	1335	+/100.00%	0
946	20nt,	4942	+/100.00%	0
947	20nt,	3356	+/100.00%	0
948	20nt,	1797	+/100.00%	0
949	20nt,	1515	+/100.00%	0
950	20nt,	4522	+/100.00%	0
951	20nt,	3159	+/100.00%	0
952	20nt,	1702	+/100.00%	0
953	20nt,	1338	+/100.00%	0
954	20nt,	4481	+/100.00%	0
955	20nt,	3249	+/100.00%	0
956	20nt,	1789	+/100.00%	0
957	20nt,	1381	+/100.00%	0
958	20nt,	4334	+/100.00%	0
959	20nt,	3064	+/100.00%	0
960	20nt,	1648	+/100.00%	0
961	20nt,	1360	+/100.00%	0
962	20nt,	4190	+/100.00%	0
963	20nt,	2976	+/100.00%	0
964	20nt,	1719	+/100.00%	0
965	20nt,	1255	+/100.00%	0
966	20nt,	3261	+/100.00%	0
967	20nt,	2439	+/100.00%	0
968	20nt,	1397	+/100.00%	0
969	20nt,	1198	+/100.00%	0
970	20nt,	8334	+/100.00%	0
971	20nt,	5106	+/100.00%	0
972	20nt,	2313	+/100.00%	0
973	20nt,	1949	+/100.00%	0
974	20nt,	3281	+/100.00%	0
975	20nt,	3188	+/100.00%	0
976	20nt,	1590	+/100.00%	0
977	20nt,	1199	+/100.00%	0
978	20nt,	5965	+/100.00%	0
979	20nt,	4104	+/100.00%	0
980	20nt,	2881	+/100.00%	0
981	20nt,	1189	+/100.00%	0
982	20nt,	7085	+/100.00%	0
983	20nt,	5016	+/100.00%	0
984	20nt,	3433	+/100.00%	0
985	20nt,	1415	+/100.00%	0
986	20nt,	6911	+/100.00%	0
987	20nt,	4966	+/100.00%	0
988	20nt,	3568	+/100.00%	0
989	20nt,	1442	+/100.00%	0
990	20nt,	6706	+/100.00%	0
991	20nt,	4738	+/100.00%	0
992	20nt,	3576	+/100.00%	0
993	20nt,	1493	+/100.00%	0
994	20nt,	4583	+/100.00%	0
995	20nt,	3116	+/100.00%	0
996	20nt,	2213	+/100.00%	0
997	20nt,	1015	+/100.00%	0
998	20nt,	3453	+/100.00%	0
999	20nt,	2390	+/100.00%	0
1000	20nt,	1378	+/100.00%	0
1001	20nt,	2981	+/100.00%	0
1002	20nt,	2167	+/100.00%	0
1003	20nt,	1188	+/100.00%	0
1004	20nt,	2968	+/100.00%	0
1005	20nt,	2156	+/100.00%	0
1006	20nt,	1403	+/100.00%	0
1007	20nt,	2700	+/100.00%	0
1008	20nt,	1875	+/100.00%	0
1009	20nt,	1024	+/100.00%	0
1010	20nt,	2685	+/100.00%	0
1011	20nt,	1923	+/100.00%	0
1012	20nt,	1182	+/100.00%	0
1013	20nt,	2663	+/100.00%	0
1014	20nt,	2069	+/100.00%	0
1015	20nt,	1191	+/100.00%	0
1016	20nt,	2547	+/100.00%	0
1017	20nt,	1958	+/100.00%	0
1018	20nt,	1013	+/100.00%	0
1019	20nt,	2285	+/100.00%	0
1020	20nt,	1710	+/100.00%	0
1021	20nt,	1005	+/100.00%	0
1022	20nt,	5860	+/100.00%	0
1023	20nt,	1572	+/100.00%	0
1024	20nt,	1685	+/100.00%	0
1025	20nt,	1298	+/100.00%	0
1026	20nt,	1040	+/100.00%	0
1027	20nt,	1297	+/100.00%	0
1028	20nt,	1780	+/100.00%	0
1029	20nt,	1640	+/100.00%	0
1030	20nt,	6185	+/100.00%	0
1031	20nt,	4502	+/100.00%	0
1032	20nt,	2354	+/100.00%	0
1033	20nt,	1889	+/100.00%	0
1034	20nt,	1167	+/100.00%	0
1035	20nt,	5899	+/100.00%	0
1036	20nt,	4393	+/100.00%	0
1037	20nt,	2335	+/100.00%	0
1038	20nt,	1800	+/100.00%	0
1039	20nt,	1163	+/100.00%	0
1040	20nt,	5120	+/100.00%	0
1041	20nt,	3666	+/100.00%	0
1042	20nt,	2121	+/100.00%	0
1043	20nt,	1472	+/100.00%	0
1044	20nt,	1109	+/100.00%	0
1045	20nt,	4907	+/100.00%	0
1046	20nt,	3496	+/100.00%	0
1047	20nt,	1923	+/100.00%	0
1048	20nt,	1314	+/100.00%	0
1049	20nt,	1013	+/100.00%	0
1050	20nt,	4906	+/100.00%	0
1051	20nt,	3514	+/100.00%	0
1052	20nt,	2066	+/100.00%	0
1053	20nt,	1549	+/100.00%	0
1054	20nt,	1059	+/100.00%	0
1055	20nt,	4444	+/100.00%	0
1056	20nt,	3190	+/100.00%	0
1057	20nt,	1834	+/100.00%	0
1058	20nt,	1331	+/100.00%	0
1059	20nt,	1022	+/100.00%	0
1060	20nt,	2192	+/100.00%	0
1061	20nt,	1374	+/100.00%	0
1062	20nt,	1150	+/100.00%	0
1063	20nt,	15231	+/100.00%	0
1064	20nt,	11134	+/100.00%	0
1065	20nt,	5604	+/100.00%	0
1066	20nt,	4014	+/100.00%	0
1067	20nt,	2604	+/100.00%	0
1068	20nt,	1258	+/100.00%	0
1069	20nt,	1367	+/100.00%	0
1070	20nt,	2049	+/100.00%	0
1071	20nt,	3664	+/100.00%	0
1072	20nt,	4408	+/100.00%	0
1073	20nt,	6890	+/100.00%	0
1074	20nt,	12080	+/100.00%	0
1075	20nt,	15626	+/100.00%	0
1076	20nt,	1117	+/100.00%	0
1077	20nt,	2235	+/100.00%	0
1078	20nt,	1774	+/100.00%	0
1079	20nt,	1449	+/100.00%	0
1080	20nt,	1894	+/100.00%	0
1081	20nt,	1374	+/100.00%	0
1082	20nt,	3059	+/100.00%	0
1083	20nt,	2771	+/100.00%	0
1084	20nt,	1915	+/100.00%	0
1085	20nt,	1180	+/100.00%	0
1086	20nt,	8831	+/100.00%	0
1087	20nt,	6276	+/100.00%	0
1088	20nt,	3466	+/100.00%	0
1089	20nt,	3000	+/100.00%	0
1090	20nt,	1707	+/100.00%	0
1091	20nt,	1031	+/100.00%	0
1092	20nt,	1282	+/100.00%	0
1093	20nt,	1491	+/100.00%	0
1094	20nt,	1593	+/100.00%	0
1095	20nt,	2710	+/100.00%	0
1096	20nt,	1160	+/100.00%	0
1097	20nt,	1127	+/100.00%	0
1098	20nt,	2574	+/100.00%	0
1099	20nt,	44241	+/100.00%	0
1100	20nt,	37389	+/100.00%	0
1101	20nt,	28109	+/100.00%	0
1102	20nt,	14005	+/100.00%	0
1103	20nt,	7140	+/100.00%	0
1104	20nt,	6856	+/100.00%	0
1105	20nt,	4727	+/100.00%	0
1106	20nt,	2722	+/100.00%	0
1107	20nt,	3745	+/100.00%	0
1108	20nt,	2684	+/100.00%	0
1109	20nt,	1358	+/100.00%	0
1110	20nt,	1292	+/100.00%	0
1111	20nt,	3499	+/100.00%	0
1112	20nt,	2393	+/100.00%	0
1113	20nt,	1273	+/100.00%	0
1114	20nt,	1177	+/100.00%	0
1115	20nt,	3107	+/100.00%	0
1116	20nt,	2526	+/100.00%	0
1117	20nt,	2069	+/100.00%	0
1118	20nt,	27424	+/100.00%	0
1119	20nt,	20764	+/100.00%	0
1120	20nt,	11249	+/100.00%	0
1121	20nt,	7903	+/100.00%	0
1122	20nt,	5613	+/100.00%	0
1123	20nt,	2839	+/100.00%	0
1124	20nt,	1749	+/100.00%	0
1125	20nt,	1053	+/100.00%	0
1126	20nt,	1670	+/100.00%	0
1127	20nt,	1137	+/100.00%	0
1128	20nt,	4065	+/100.00%	0
1129	20nt,	2787	+/100.00%	0
1130	20nt,	2702	+/100.00%	0
1131	20nt,	1635	+/100.00%	0
1132	20nt,	1408	+/100.00%	0
1133	20nt,	4296	+/100.00%	0
1134	20nt,	3588	+/100.00%	0
1135	20nt,	1535	+/100.00%	0
1136	20nt,	1037	+/100.00%	0
1137	20nt,	1105	+/100.00%	0
1138	20nt,	1107	+/100.00%	0
1139	20nt,	1181	+/100.00%	0
1140	20nt,	1213	+/100.00%	0
1141	20nt,	1281	+/100.00%	0
1142	20nt,	1319	+/100.00%	0
1143	20nt,	1326	+/100.00%	0
1144	20nt,	1337	+/100.00%	0
1145	20nt,	1384	+/100.00%	0
1146	20nt,	1427	+/100.00%	0
1147	20nt,	1565	+/100.00%	0
1148	20nt,	1653	+/100.00%	0
1149	20nt,	1708	+/100.00%	0
1150	20nt,	1805	+/100.00%	0
1151	20nt,	1817	+/100.00%	0
1152	20nt,	1874	+/100.00%	0
1153	20nt,	1905	+/100.00%	0
1154	20nt,	2328	+/100.00%	0
1155	20nt,	2343	+/100.00%	0
1156	20nt,	383559	+/100.00%	0
1157	20nt,	275109	+/100.00%	0
1158	20nt,	149291	+/100.00%	0
1159	20nt,	111674	+/100.00%	0
1160	20nt,	74473	+/100.00%	0
1161	20nt,	1296	+/100.00%	0
1162	20nt,	41010	+/100.00%	0
1163	20nt,	27738	+/100.00%	0
1164	20nt,	15459	+/100.00%	0
1165	20nt,	9902	+/100.00%	0
1166	20nt,	8676	+/100.00%	0
1167	20nt,	4967	+/100.00%	0
1168	20nt,	2954	+/100.00%	0
1169	20nt,	1929	+/100.00%	0
1170	20nt,	1177	+/100.00%	0
1171	20nt,	4085	+/100.00%	0
1172	20nt,	2818	+/100.00%	0
1173	20nt,	1779	+/100.00%	0
1174	20nt,	2663	+/100.00%	0
1175	20nt,	2062	+/100.00%	0
1176	20nt,	1727	+/100.00%	0
1177	20nt,	1269	+/100.00%	0
1178	20nt,	1469	+/100.00%	0
1179	20nt,	1292	+/100.00%	0
1180	20nt,	1219	+/100.00%	0
1181	20nt,	1069	+/100.00%	0
1182	20nt,	12323	+/100.00%	0
1183	20nt,	3288	+/100.00%	0
1184	20nt,	2063	+/100.00%	0
1185	20nt,	1983	+/100.00%	0
1186	20nt,	1682	+/100.00%	0
1187	20nt,	1048	+/100.00%	0
1188	20nt,	1949	+/100.00%	0
1189	20nt,	4459	+/100.00%	0
1190	20nt,	9230	+/100.00%	0
1191	20nt,	14016	+/100.00%	0
1192	20nt,	14908	+/100.00%	0
1193	20nt,	82422	+/100.00%	0
1194	20nt,	1423	+/100.00%	0
1195	20nt,	1065	+/100.00%	0
1196	20nt,	1023	+/100.00%	0
1197	20nt,	1930	+/100.00%	0
1198	20nt,	1688	+/100.00%	0
1199	20nt,	3788	+/100.00%	0
1200	20nt,	3559	+/100.00%	0
1201	20nt,	1912	+/100.00%	0
1202	20nt,	1343	+/100.00%	0
1203	20nt,	8248	+/100.00%	0
1204	20nt,	6835	+/100.00%	0
1205	20nt,	4582	+/100.00%	0
1206	20nt,	2975	+/100.00%	0
1207	20nt,	1360	+/100.00%	0
1208	20nt,	2015	+/100.00%	0
1209	20nt,	2025	+/100.00%	0
1210	20nt,	1004	+/100.00%	0
1211	20nt,	1142	+/100.00%	0
1212	20nt,	2602	+/100.00%	0
1213	20nt,	1507	+/100.00%	0
1214	20nt,	1169	+/100.00%	0
1215	20nt,	7486	+/100.00%	0
1216	20nt,	5309	+/100.00%	0
1217	20nt,	4068	+/100.00%	0
1218	20nt,	1714	+/100.00%	0
1219	20nt,	1299	+/100.00%	0
1220	20nt,	1205	+/100.00%	0
1221	20nt,	1348	+/100.00%	0
1222	20nt,	1549	+/100.00%	0
1223	20nt,	1058	+/100.00%	0
1224	20nt,	3851	+/100.00%	0
1225	20nt,	2379	+/100.00%	0
1226	20nt,	2001	+/100.00%	0
1227	20nt,	1536	+/100.00%	0
1228	20nt,	1317	+/100.00%	0
1229	20nt,	1887	+/100.00%	0
1230	20nt,	1239	+/100.00%	0
1231	20nt,	1019	+/100.00%	0
1232	20nt,	3072	+/100.00%	0
1233	20nt,	1910	+/100.00%	0
1234	20nt,	1580	+/100.00%	0
1235	20nt,	1405	+/100.00%	0
1236	20nt,	3012	+/100.00%	0
1237	20nt,	8772	+/100.00%	0
1238	20nt,	21029	+/100.00%	0
1239	20nt,	22165	+/100.00%	0
1240	20nt,	37962	+/100.00%	0
1241	20nt,	1213	+/100.00%	0
1242	20nt,	1051	+/100.00%	0
1243	20nt,	1153	+/100.00%	0
1244	20nt,	1428	+/100.00%	0
1245	20nt,	5275	+/100.00%	0
1246	20nt,	3723	+/100.00%	0
1247	20nt,	2058	+/100.00%	0
1248	20nt,	1832	+/100.00%	0
1249	20nt,	1374	+/100.00%	0
1250	20nt,	1428	+/100.00%	0
1251	20nt,	1047	+/100.00%	0
1252	20nt,	14569	+/100.00%	0
1253	20nt,	9692	+/100.00%	0
1254	20nt,	5240	+/100.00%	0
1255	20nt,	4640	+/100.00%	0
1256	20nt,	2135	+/100.00%	0
1257	20nt,	1768	+/100.00%	0
1258	20nt,	1722	+/100.00%	0
1259	20nt,	1803	+/100.00%	0
1260	20nt,	1211	+/100.00%	0
1261	20nt,	1504	+/100.00%	0
1262	20nt,	1431	+/100.00%	0
1263	20nt,	1337	+/100.00%	0
1264	20nt,	1050	+/100.00%	0
1265	20nt,	1360	+/100.00%	0
1266	20nt,	13677	+/100.00%	0
1267	20nt,	11213	+/100.00%	0
1268	20nt,	7108	+/100.00%	0
1269	20nt,	2873	+/100.00%	0
1270	20nt,	1056	+/100.00%	0
1271	20nt,	1664	+/100.00%	0
1272	20nt,	1168	+/100.00%	0
1273	20nt,	1252	+/100.00%	0
1274	20nt,	1450	+/100.00%	0
1275	20nt,	1182	+/100.00%	0
1276	20nt,	1261	+/100.00%	0
1277	20nt,	3366	+/100.00%	0
1278	20nt,	2606	+/100.00%	0
1279	20nt,	1830	+/100.00%	0
1280	20nt,	13161	+/100.00%	0
1281	20nt,	12310	+/100.00%	0
1282	20nt,	6016	+/100.00%	0
1283	20nt,	2287	+/100.00%	0
1284	20nt,	1065	+/100.00%	0
1285	20nt,	10475	+/100.00%	0
1286	20nt,	8014	+/100.00%	0
1287	20nt,	6388	+/100.00%	0
1288	20nt,	3019	+/100.00%	0
1289	20nt,	1168	+/100.00%	0
1290	20nt,	4790	+/100.00%	0
1291	20nt,	4383	+/100.00%	0
1292	20nt,	3559	+/100.00%	0
1293	20nt,	3351	+/100.00%	0
1294	20nt,	2023	+/100.00%	0
1295	20nt,	1476	+/100.00%	0
1296	20nt,	1778	+/100.00%	0
1297	20nt,	1196	+/100.00%	0
1298	20nt,	1608	+/100.00%	0
1299	20nt,	1057	+/100.00%	0
1300	20nt,	1039	+/100.00%	0
1301	20nt,	2880	+/100.00%	0
1302	20nt,	2545	+/100.00%	0
1303	20nt,	1245	+/100.00%	0
1304	20nt,	1065	+/100.00%	0
1305	20nt,	1397	+/100.00%	0
1306	20nt,	3558	+/100.00%	0
1307	20nt,	5657	+/100.00%	0
1308	20nt,	1177	+/100.00%	0
1309	20nt,	1117	+/100.00%	0
1310	20nt,	1859	+/100.00%	0
1311	20nt,	1653	+/100.00%	0
1312	20nt,	1485	+/100.00%	0
1313	20nt,	1390	+/100.00%	0
1314	20nt,	1231	+/100.00%	0
1315	20nt,	1176	+/100.00%	0
1316	20nt,	1153	+/100.00%	0
1317	20nt,	2497	+/100.00%	0
1318	20nt,	2074	+/100.00%	0
1319	20nt,	1996	+/100.00%	0
1320	20nt,	1428	+/100.00%	0
1321	20nt,	1128	+/100.00%	0
1322	20nt,	1017	+/100.00%	0
1323	20nt,	2667	+/100.00%	0
1324	20nt,	1882	+/100.00%	0
1325	20nt,	1373	+/100.00%	0
1326	20nt,	2558	+/100.00%	0
1327	20nt,	1778	+/100.00%	0
1328	20nt,	1520	+/100.00%	0
1329	20nt,	1175	+/100.00%	0
1330	20nt,	1018	+/100.00%	0
1331	20nt,	6848	+/100.00%	0
1332	20nt,	5107	+/100.00%	0
1333	20nt,	3536	+/100.00%	0
1334	20nt,	1504	+/100.00%	0
1335	20nt,	1048	+/100.00%	0
1336	20nt,	2176	+/100.00%	0
1337	20nt,	2166	+/100.00%	0
1338	20nt,	1005	+/100.00%	0
1339	20nt,	2402	+/100.00%	0
1340	20nt,	1991	+/100.00%	0
1341	20nt,	1909	+/100.00%	0
1342	20nt,	1869	+/100.00%	0
1343	20nt,	1460	+/100.00%	0
1344	20nt,	1382	+/100.00%	0
1345	20nt,	1324	+/100.00%	0
1346	20nt,	1237	+/100.00%	0
1347	20nt,	1196	+/100.00%	0
1348	20nt,	1132	+/100.00%	0
1349	20nt,	4908	+/100.00%	0
1350	20nt,	1090	+/100.00%	0
1351	20nt,	5865	+/100.00%	0
1352	20nt,	3695	+/100.00%	0
1353	20nt,	2786	+/100.00%	0
1354	20nt,	2453	+/100.00%	0
1355	20nt,	2344	+/100.00%	0
1356	20nt,	1002	+/100.00%	0
1357	20nt,	66640	+/100.00%	0
1358	20nt,	65227	+/100.00%	0
1359	20nt,	27546	+/100.00%	0
1360	20nt,	9058	+/100.00%	0
1361	20nt,	3478	+/100.00%	0
1362	20nt,	2220	+/100.00%	0
1363	20nt,	9228	+/100.00%	0
1364	20nt,	5737	+/100.00%	0
1365	20nt,	3607	+/100.00%	0
1366	20nt,	2193	+/100.00%	0
1367	20nt,	1515	+/100.00%	0
1368	20nt,	4759	+/100.00%	0
1369	20nt,	3483	+/100.00%	0
1370	20nt,	1692	+/100.00%	0
1371	20nt,	1604	+/100.00%	0
1372	20nt,	5647	+/100.00%	0
1373	20nt,	5626	+/100.00%	0
1374	20nt,	2210	+/100.00%	0
1375	20nt,	1016	+/100.00%	0
1376	20nt,	2109	+/100.00%	0
1377	20nt,	2113	+/100.00%	0
1378	20nt,	1323	+/100.00%	0
1379	20nt,	2953	+/100.00%	0
1380	20nt,	3703	+/100.00%	0
1381	20nt,	2397	+/100.00%	0
1382	20nt,	1937	+/100.00%	0
1383	20nt,	1424	+/100.00%	0
1384	20nt,	1164	+/100.00%	0
1385	20nt,	2450	+/100.00%	0
1386	20nt,	2055	+/100.00%	0
1387	20nt,	1435	+/100.00%	0
1388	20nt,	1744	+/100.00%	0
1389	20nt,	1936	+/100.00%	0
1390	20nt,	1072	+/100.00%	0
1391	20nt,	1362	+/100.00%	0
1392	20nt,	1563	+/100.00%	0
1393	20nt,	1282	+/100.00%	0
1394	20nt,	2596	+/100.00%	0
1395	20nt,	2240	+/100.00%	0
1396	20nt,	1282	+/100.00%	0
1397	20nt,	1758	+/100.00%	0
1398	20nt,	1281	+/100.00%	0
1399	20nt,	1132	+/100.00%	0
1400	20nt,	1476	+/100.00%	0
1401	20nt,	1471	+/100.00%	0
1402	20nt,	1108	+/100.00%	0
1403	20nt,	1444	+/100.00%	0
1404	20nt,	1031	+/100.00%	0
1405	20nt,	3620	+/100.00%	0
1406	20nt,	2974	+/100.00%	0
1407	20nt,	1867	+/100.00%	0
1408	20nt,	1104	+/100.00%	0
1409	20nt,	2125	+/100.00%	0
1410	20nt,	1513	+/100.00%	0
1411	20nt,	3887	+/100.00%	0
1412	20nt,	2843	+/100.00%	0
1413	20nt,	1750	+/100.00%	0
1414	20nt,	7543	+/100.00%	0
1415	20nt,	6372	+/100.00%	0
1416	20nt,	3458	+/100.00%	0
1417	20nt,	1616	+/100.00%	0
1418	20nt,	3603	+/100.00%	0
1419	20nt,	1967	+/100.00%	0
1420	20nt,	1849	+/100.00%	0
1421	20nt,	2283	+/100.00%	0
1422	20nt,	1611	+/100.00%	0
1423	20nt,	1208	+/100.00%	0
1424	20nt,	1458	+/100.00%	0
1425	20nt,	1098	+/100.00%	0
1426	20nt,	1402	+/100.00%	0
1427	20nt,	1030	+/100.00%	0
1428	20nt,	1362	+/100.00%	0
1429	20nt,	1404	+/100.00%	0
1430	20nt,	1088	+/100.00%	0
1431	20nt,	1272	+/100.00%	0
1432	20nt,	4803	+/100.00%	0
1433	20nt,	1339	+/100.00%	0
1434	20nt,	1122	+/100.00%	0
1435	20nt,	3215	+/100.00%	0
1436	20nt,	1272	+/100.00%	0
1437	20nt,	1914	+/100.00%	0
1438	20nt,	1812	+/100.00%	0
1439	20nt,	1910	+/100.00%	0
1440	20nt,	1079	+/100.00%	0
1441	20nt,	2502	+/100.00%	0
1442	20nt,	16572	+/100.00%	0
1443	20nt,	1173	+/100.00%	0
1444	20nt,	1708	+/100.00%	0
1445	20nt,	1249	+/100.00%	0
1446	20nt,	1267	+/100.00%	0
1447	20nt,	2537	+/100.00%	0
1448	20nt,	2012	+/100.00%	0
1449	20nt,	1253	+/100.00%	0
1450	20nt,	2015	+/100.00%	0
1451	20nt,	1920	+/100.00%	0
1452	20nt,	1546	+/100.00%	0
1453	20nt,	1207	+/100.00%	0
1454	20nt,	1357	+/100.00%	0
1455	20nt,	1107	+/100.00%	0
1456	20nt,	2099	+/100.00%	0
1457	20nt,	1887	+/100.00%	0
1458	20nt,	1652	+/100.00%	0
1459	20nt,	1280	+/100.00%	0
1460	20nt,	1627	+/100.00%	0
1461	20nt,	1358	+/100.00%	0
1462	20nt,	1597	+/100.00%	0
1463	20nt,	1004	+/100.00%	0
1464	20nt,	1562	+/100.00%	0
1465	20nt,	1549	+/100.00%	0
1466	20nt,	1413	+/100.00%	0
1467	20nt,	1074	+/100.00%	0
1468	20nt,	1937	+/100.00%	0
1469	20nt,	1594	+/100.00%	0
1470	20nt,	1558	+/100.00%	0
1471	20nt,	1163	+/100.00%	0
1472	20nt,	1518	+/100.00%	0
1473	20nt,	1131	+/100.00%	0
1474	20nt,	1083	+/100.00%	0
1475	20nt,	1019	+/100.00%	0
1476	20nt,	1180	+/100.00%	0
1477	20nt,	1030	+/100.00%	0
1478	20nt,	1336	+/100.00%	0
1479	20nt,	1261	+/100.00%	0
1480	20nt,	1118	+/100.00%	0
1481	20nt,	1102	+/100.00%	0
1482	20nt,	1099	+/100.00%	0
1483	20nt,	1069	+/100.00%	0
1484	20nt,	1059	+/100.00%	0
1485	20nt,	1044	+/100.00%	0
1486	20nt,	1536	+/100.00%	0
1487	20nt,	1445	+/100.00%	0
1488	20nt,	1121	+/100.00%	0
1489	20nt,	1051	+/100.00%	0
1490	20nt,	1137	+/100.00%	0
1491	20nt,	1034	+/100.00%	0
1492	20nt,	1320	+/100.00%	0
1493	20nt,	1018	+/100.00%	0
1494	20nt,	1299	+/100.00%	0
1495	20nt,	1185	+/100.00%	0
1496	20nt,	1035	+/100.00%	0
1497	20nt,	1640	+/100.00%	0
1498	20nt,	1575	+/100.00%	0
1499	20nt,	1070	+/100.00%	0
1500	20nt,	11108	+/100.00%	0
1501	20nt,	8305	+/100.00%	0
1502	20nt,	6042	+/100.00%	0
1503	20nt,	2563	+/100.00%	0
1504	20nt,	1253	+/100.00%	0
1505	20nt,	1328	+/100.00%	0
1506	20nt,	9012	+/100.00%	0
1507	20nt,	6864	+/100.00%	0
1508	20nt,	4452	+/100.00%	0
1509	20nt,	1886	+/100.00%	0
1510	20nt,	1640	+/100.00%	0
1511	20nt,	2420	+/100.00%	0
1512	20nt,	1531	+/100.00%	0
1513	20nt,	1281	+/100.00%	0
1514	20nt,	3336	+/100.00%	0
1515	20nt,	2272	+/100.00%	0
1516	20nt,	1687	+/100.00%	0
1517	20nt,	1193	+/100.00%	0
1518	20nt,	1162	+/100.00%	0
1519	20nt,	4184	+/100.00%	0
1520	20nt,	3242	+/100.00%	0
1521	20nt,	2183	+/100.00%	0
1522	20nt,	3362	+/100.00%	0
1523	20nt,	2480	+/100.00%	0
1524	20nt,	1785	+/100.00%	0
1525	20nt,	2849	+/100.00%	0
1526	20nt,	2101	+/100.00%	0
1527	20nt,	1281	+/100.00%	0
1528	20nt,	2443	+/100.00%	0
1529	20nt,	1866	+/100.00%	0
1530	20nt,	1283	+/100.00%	0
1531	20nt,	1964	+/100.00%	0
1532	20nt,	1154	+/100.00%	0
1533	20nt,	1128	+/100.00%	0
1534	20nt,	1760	+/100.00%	0
1535	20nt,	1251	+/100.00%	0
1536	20nt,	1040	+/100.00%	0
1537	20nt,	2506	+/100.00%	0
1538	20nt,	1235	+/100.00%	0
1539	20nt,	3955	+/100.00%	0
1540	20nt,	2779	+/100.00%	0
1541	20nt,	1618	+/100.00%	0
1542	20nt,	1218	+/100.00%	0
1543	20nt,	4807	+/100.00%	0
1544	20nt,	3000	+/100.00%	0
1545	20nt,	2582	+/100.00%	0
1546	20nt,	1244	+/100.00%	0
1547	20nt,	1538	+/100.00%	0
1548	20nt,	3775	+/100.00%	0
1549	20nt,	5790	+/100.00%	0
1550	20nt,	8178	+/100.00%	0
1551	20nt,	1094	+/100.00%	0
1552	20nt,	1617	+/100.00%	0
1553	20nt,	1274	+/100.00%	0
1554	20nt,	2279	+/100.00%	0
1555	20nt,	5566	+/100.00%	0
1556	20nt,	7770	+/100.00%	0
1557	20nt,	10902	+/100.00%	0
1558	20nt,	1066	+/100.00%	0
1559	20nt,	1920	+/100.00%	0
1560	20nt,	1613	+/100.00%	0
1561	20nt,	1068	+/100.00%	0
1562	20nt,	8141	+/100.00%	0
1563	20nt,	6259	+/100.00%	0
1564	20nt,	3981	+/100.00%	0
1565	20nt,	1543	+/100.00%	0
1566	20nt,	1364	+/100.00%	0
1567	20nt,	2824	+/100.00%	0
1568	20nt,	6992	+/100.00%	0
1569	20nt,	16624	+/100.00%	0
1570	20nt,	22568	+/100.00%	0
1571	20nt,	30752	+/100.00%	0
1572	20nt,	1189	+/100.00%	0
1573	20nt,	4046	+/100.00%	0
1574	20nt,	3353	+/100.00%	0
1575	20nt,	2063	+/100.00%	0
1576	20nt,	1150	+/100.00%	0
1577	20nt,	3860	+/100.00%	0
1578	20nt,	2714	+/100.00%	0
1579	20nt,	1907	+/100.00%	0
1580	20nt,	1342	+/100.00%	0
1581	20nt,	1710	+/100.00%	0
1582	20nt,	1067	+/100.00%	0
1583	20nt,	1313	+/100.00%	0
1584	20nt,	2019	+/100.00%	0
1585	20nt,	1191	+/100.00%	0
1586	20nt,	1748	+/100.00%	0
1587	20nt,	2977	+/100.00%	0
1588	20nt,	5325	+/100.00%	0
1589	20nt,	6007	+/100.00%	0
1590	20nt,	2083	+/100.00%	0
1591	20nt,	2065	+/100.00%	0
1592	20nt,	1327	+/100.00%	0
1593	20nt,	2570	+/100.00%	0
1594	20nt,	1641	+/100.00%	0
1595	20nt,	1407	+/100.00%	0
1596	20nt,	1158	+/100.00%	0
1597	20nt,	43255	+/100.00%	0
1598	20nt,	37178	+/100.00%	0
1599	20nt,	20831	+/100.00%	0
1600	20nt,	11400	+/100.00%	0
1601	20nt,	9717	+/100.00%	0
1602	20nt,	3814	+/100.00%	0
1603	20nt,	1013	+/100.00%	0
1604	20nt,	2802	+/100.00%	0
1605	20nt,	2629	+/100.00%	0
1606	20nt,	1677	+/100.00%	0
1607	20nt,	1992	+/100.00%	0
1608	20nt,	2236	+/100.00%	0
1609	20nt,	1377	+/100.00%	0
1610	20nt,	5521	+/100.00%	0
1611	20nt,	2279	+/100.00%	0
1612	20nt,	3720	+/100.00%	0
1613	20nt,	1374	+/100.00%	0
1614	20nt,	2761	+/100.00%	0
1615	20nt,	2339	+/100.00%	0
1616	20nt,	1418	+/100.00%	0
1617	20nt,	4900	+/100.00%	0
1618	20nt,	3898	+/100.00%	0
1619	20nt,	2442	+/100.00%	0
1620	20nt,	2450	+/100.00%	0
1621	20nt,	3935	+/100.00%	0
1622	20nt,	2251	+/100.00%	0
1623	20nt,	3257	+/100.00%	0
1624	20nt,	4447	+/100.00%	0
1625	20nt,	7210	+/100.00%	0
1626	20nt,	5470	+/100.00%	0
1627	20nt,	3376	+/100.00%	0
1628	20nt,	1346	+/100.00%	0
1629	20nt,	1196	+/100.00%	0
1630	20nt,	1846	+/100.00%	0
1631	20nt,	1582	+/100.00%	0
1632	20nt,	20274	+/100.00%	0
1633	20nt,	1414	+/100.00%	0
1634	20nt,	5379	+/100.00%	0
1635	20nt,	4534	+/100.00%	0
1636	20nt,	2570	+/100.00%	0
1637	20nt,	1037	+/100.00%	0
1638	20nt,	1107	+/100.00%	0
1639	20nt,	6063	+/100.00%	0
1640	20nt,	4848	+/100.00%	0
1641	20nt,	2770	+/100.00%	0
1642	20nt,	1013	+/100.00%	0
1643	20nt,	31664	+/100.00%	0
1644	20nt,	20497	+/100.00%	0
1645	20nt,	19016	+/100.00%	0
1646	20nt,	8663	+/100.00%	0
1647	20nt,	3482	+/100.00%	0
1648	20nt,	1273	+/100.00%	0
1649	20nt,	1110	+/100.00%	0
1650	20nt,	334780	+/100.00%	0
1651	20nt,	462389	+/100.00%	0
1652	20nt,	2909	+/100.00%	0
1653	20nt,	2715	+/100.00%	0
1654	20nt,	2379	+/100.00%	0
1655	20nt,	2275	+/100.00%	0
1656	20nt,	2259	+/100.00%	0
1657	20nt,	2084	+/100.00%	0
1658	20nt,	2047	+/100.00%	0
1659	20nt,	2002	+/100.00%	0
1660	20nt,	1940	+/100.00%	0
1661	20nt,	1724	+/100.00%	0
1662	20nt,	1698	+/100.00%	0
1663	20nt,	1635	+/100.00%	0
1664	20nt,	1608	+/100.00%	0
1665	20nt,	1529	+/100.00%	0
1666	20nt,	1493	+/100.00%	0
1667	20nt,	1477	+/100.00%	0
1668	20nt,	1452	+/100.00%	0
1669	20nt,	1448	+/100.00%	0
1670	20nt,	1447	+/100.00%	0
1671	20nt,	1358	+/100.00%	0
1672	20nt,	1319	+/100.00%	0
1673	20nt,	1294	+/100.00%	0
1674	20nt,	1235	+/100.00%	0
1675	20nt,	1167	+/100.00%	0
1676	20nt,	1161	+/100.00%	0
1677	20nt,	1084	+/100.00%	0
1678	20nt,	1073	+/100.00%	0
1679	20nt,	1065	+/100.00%	0
1680	20nt,	1063	+/100.00%	0
1681	20nt,	1038	+/100.00%	0
1682	20nt,	1019	+/100.00%	0
1683	20nt,	1054	+/100.00%	0
1684	20nt,	2197	+/100.00%	0
1685	20nt,	2230	+/100.00%	0
1686	20nt,	2338	+/100.00%	0
1687	20nt,	1158	+/100.00%	0
1688	20nt,	1416	+/100.00%	0
1689	20nt,	2837	+/100.00%	0
1690	20nt,	3391	+/100.00%	0
1691	20nt,	3514	+/100.00%	0
1692	20nt,	2378	+/100.00%	0
1693	20nt,	3031	+/100.00%	0
1694	20nt,	7311	+/100.00%	0
1695	20nt,	1590	+/100.00%	0
1696	20nt,	3457	+/100.00%	0
1697	20nt,	3663	+/100.00%	0
1698	20nt,	1195	+/100.00%	0
1699	20nt,	2960	+/100.00%	0
1700	20nt,	3338	+/100.00%	0
1701	20nt,	3861	+/100.00%	0
1702	20nt,	1210	+/100.00%	0
1703	20nt,	2085	+/100.00%	0
1704	20nt,	2075	+/100.00%	0
1705	20nt,	3042	+/100.00%	0
1706	20nt,	2004	+/100.00%	0
1707	20nt,	5319	+/100.00%	0
1708	20nt,	12171	+/100.00%	0
1709	20nt,	15504	+/100.00%	0
1710	20nt,	22647	+/100.00%	0
1711	20nt,	1453	+/100.00%	0
1712	20nt,	1220	+/100.00%	0
1713	20nt,	2149	+/100.00%	0
1714	20nt,	2457	+/100.00%	0
1715	20nt,	1009	+/100.00%	0
1716	20nt,	7929	+/100.00%	0
1717	20nt,	6057	+/100.00%	0
1718	20nt,	4232	+/100.00%	0
1719	20nt,	1674	+/100.00%	0
1720	20nt,	1517	+/100.00%	0
1721	20nt,	1071	+/100.00%	0
1722	20nt,	242794	+/100.00%	0
1723	20nt,	101882	+/100.00%	0
1724	20nt,	38330	+/100.00%	0
1725	20nt,	13061	+/100.00%	0
1726	20nt,	6703	+/100.00%	0
1727	20nt,	2996	+/100.00%	0
1728	20nt,	1358	+/100.00%	0
1729	20nt,	1575	+/100.00%	0
1730	20nt,	1320	+/100.00%	0
1731	20nt,	5264	+/100.00%	0
1732	20nt,	1183	+/100.00%	0
1733	20nt,	5757	+/100.00%	0
1734	20nt,	1011	+/100.00%	0
1735	20nt,	7105	+/100.00%	0
1736	20nt,	6703	+/100.00%	0
1737	20nt,	3162	+/100.00%	0
1738	20nt,	1129	+/100.00%	0
1739	20nt,	4263	+/100.00%	0
1740	20nt,	1619	+/100.00%	0
1741	20nt,	2292	+/100.00%	0
1742	20nt,	1732	+/100.00%	0
1743	20nt,	1610	+/100.00%	0
1744	20nt,	1490	+/100.00%	0
1745	20nt,	2911	+/100.00%	0
1746	20nt,	1712	+/100.00%	0
1747	20nt,	1261	+/100.00%	0
1748	20nt,	1105	+/100.00%	0
[truncated: 1,749 more rows]

## Sheet: R11
Cluster 0				11719	0.248117	Cluster % Total	Reads
0	24nt,	4463	+/100.00%	0		100	4723169						3078		3078	CCGCACGAAATGGCTCGAAG
1	24nt,	2431	+/100.00%	0		Cluster	Representation	Representative	Sequence	Alt Sequence 1	Alt Sequence 2	Alt Sequence 3	CCGCACGAAATGGCTCGAAG		6853	CCGCACAAATGGCTCGAAG
2	25nt,	2423		0		0	0.248117	2423	CCGCACAAAAAAAAAGAGCGCCAAC				6853		1950	CCGCACAAAATGGCTCGAAG
3	25nt,	1385	+/100.00%	0		1	0.0504746	1337	CCGCACAAAAAACAAGCGCCAAC				CCGCACAAATGGCTCGAAG		2194	CCGCACAAAATGGCTCGAGG
4	24nt,	1017	+/100.00%	0		2	0.244243	6177	CCGCACAAAAAAAGAGCGCCAAC				1950		2183	CCGCACAAGATGGCTCGAAG
Cluster 1				2384	0.0504746	3	0.0510674	1282	CCGCACAAAAACAAGCGCCAAC				CCGCACAAAATGGCTCGAAG		1273	CCGCACAGAATGGCTCGAAG
0	23nt,	1337		0		4	0.226246	1151	CCGCACAAAAAAGAGCGCCAAC	CCGCACAAATTAGCGCCATC			2194		1710	CCGCACAAAATGACTCGAAG
1	23nt,	1047	+/100.00%	0		5	0.0213204	1007	CCGCACAAAACAAGCGCCAAC				CCGCACAAAATGGCTCGAGG		7703	CCGCACAATATAGCGCCATC
Cluster 2				11536	0.244243	6	0.225802	3078	CCGCACGAAATGGCTCGAAG				2183		1509	CCGCACAAACCAGCGACAAC
0	23nt,	6177		0		7	16.1355	1950	CCGCACAAAATGGCTCGAAG				CCGCACAAGATGGCTCGAAG		2284	CCGCACAAAATTGTGCCAAC
1	23nt,	3830	+/100.00%	0		8	0.324951	2194	CCGCACAAAATGGCTCGAGG				1273		1006	CCGCACAAATTGTGCCAAC
2	23nt,	1529	+/100.00%	0		9	0.206577	2183	CCGCACAAGATGGCTCGAAG	CCGCACAGAATGGCGCCAAC			CCGCACAGAATGGCTCGAAG		2747	CCGCACAAAATGGCGCCAAC
Cluster 3				2412	0.0510674	10	0.0269522	1273	CCGCACAGAATGGCTCGAAG	CCGCACGAAATCGTGCCAAC			1710		1187	CCGCACAAAATAGCGTCAAC
0	22nt,	1282		0		11	0.0362045	1710	CCGCACAAAATGACTCGAAG				CCGCACAAAATGACTCGAAG		10768	CCGCACAAAATAGCGCCATC
1	22nt,	1130	+/100.00%	0		12	0.16309	7703	CCGCACAATATAGCGCCATC				7703		1166	CCGCACAAAAAAGCGCTAAC
Cluster 4				10686	0.226246	13	0.0603832	1509	CCGCACAAACCAGCGACAAC				CCGCACAATATAGCGCCATC		2448	CCGCACAAACAAGCGCCAAC
0	22nt,	1151		0		14	0.653904	2284	CCGCACAAAATTGTGCCAAC				1509		1337	CCGCACAAAAAACAAGCGCCAAC
1	22nt,	4984	+/100.00%	0		15	0.416818	2747	CCGCACAAAATGGCGCCAAC				CCGCACAAACCAGCGACAAC		1282	CCGCACAAAAACAAGCGCCAAC
2	22nt,	3228	+/100.00%	0		16	0.0251314	1187	CCGCACAAAATAGCGTCAAC				2284		1007	CCGCACAAAACAAGCGCCAAC
3	22nt,	1323	+/100.00%	0		17	0.801983	10768	CCGCACAAAATAGCGCCATC				CCGCACAAAATTGTGCCAAC		1564	CCGCACAAAATCGCGCCAAC
Cluster 5				1007	0.0213204	18	0.0246868	1166	CCGCACAAAAAAGCGCTAAC				1006		2091	CCGCACAAAGTCGCGCCAAC
0	21nt,	1007		0		19	2.42968	2448	CCGCACAAACAAGCGCCAAC				CCGCACAAATTGTGCCAAC		1075	CCGCACAAAACGGCGCCAAC
Cluster 6				10665	0.225802	20	1.00242	1564	CCGCACAAAATCGCGCCAAC				2747		1029	CCGCACAAAATAGCGCCAAC
0	20nt,	3078		0		21	0.0442711	2091	CCGCACAAAGTCGCGCCAAC				CCGCACAAAATGGCGCCAAC		2278	CCGCACAAAATAGCGCCAGC
1	20nt,	6477	+/100.00%	0		22	0.0227601	1075	CCGCACAAAACGGCGCCAAC				1187		1054	CCGCACAAAATAGCGCGAAC
2	20nt,	1110	+/100.00%	0		23	24.7567	1029	CCGCACAAAATAGCGCCAAC				CCGCACAAAATAGCGTCAAC		2183	CCGCACAGAATGGCGCCAAC
Cluster 7				762105	16.1355	24	0.0702918	2278	CCGCACAAAATAGCGCCAGC				10768		1267	CCGCACAAAACAGCGCCAGC
0	20nt,	1950		0		25	0.857962	1054	CCGCACAAAATAGCGCGAAC				CCGCACAAAATAGCGCCATC		1151	CCGCACAAAAAAGAGCGCCAAC
1	20nt,	4999	+/100.00%	0		26	0.0693179	2183	CCGCACAAGATGGCTCGAAG	CCGCACAGAATGGCGCCAAC			1166		6177	CCGCACAAAAAAAGAGCGCCAAC
2	20nt,	1147	+/100.00%	0		27	0.0268252	1267	CCGCACAAAACAGCGCCAGC				CCGCACAAAAAAGCGCTAAC		3071	CCGCACAAAAGAGCGCCAAC
3	20nt,	2278	+/100.00%	0		28	0.36105	3071	CCGCACAAAAGAGCGCCAAC				2448		2423	CCGCACAAAAAAAAAGAGCGCCAAC
4	20nt,	8443	+/100.00%	0		29	0.04425	1090	CCGCACAAAATATCGCCAAC				CCGCACAAACAAGCGCCAAC		1090	CCGCACAAAATATCGCCAAC
5	20nt,	1473	+/100.00%	0		30	0.0678993	1131	CCGCACAGAATAGCGCCAAC				1337		1131	CCGCACAGAATAGCGCCAAC
6	20nt,	1411	+/100.00%	0		31	0.0243269	1149	CCGCACTAAATAGCGCCAAC				CCGCACAAAAAACAAGCGCCAAC		1149	CCGCACTAAATAGCGCCAAC
7	20nt,	10142	+/100.00%	0		32	0.0227813	1076	CCGCACGAAATAGCGCCAAC				1282		1076	CCGCACGAAATAGCGCCAAC
8	20nt,	1586	+/100.00%	0		33	0.256417	1151	CCGCACAAAAAAGAGCGCCAAC	CCGCACAAATTAGCGCCATC			CCGCACAAAAACAAGCGCCAAC		3603	CCGCACAAATAGCGCCAAC
9	20nt,	1366	+/100.00%	0		34	1.49465	1055	CCGCACTAAATAGTGCCACC				1007		1151	CCGCACAAATTAGCGCCATC
10	20nt,	1477	+/100.00%	0		35	0.0746744	3527	CCGCACAAATTAGAGCCAAC				CCGCACAAAACAAGCGCCAAC		1055	CCGCACTAAATAGTGCCACC
11	20nt,	1870	+/100.00%	0		36	0.259571	1135	CCGCACTGAACAGTGCCAAC				1564		3527	CCGCACAAATTAGAGCCAAC
12	20nt,	1535	+/100.00%	0		37	1.14237	1769	CCGCACAGAACTGTGCCACC				CCGCACAAAATCGCGCCAAC		1135	CCGCACTGAACAGTGCCAAC
13	20nt,	1913	+/100.00%	0		38	0.025576	1208	CCGCACACAAGTGTGCCACC				2091		1769	CCGCACAGAACTGTGCCACC
14	20nt,	1353	+/100.00%	0		39	6.10444	2708	CCGCACAAAATTGTGCCACC				CCGCACAAAGTCGCGCCAAC		1208	CCGCACACAAGTGTGCCACC
15	20nt,	4018	+/100.00%	0		40	0.0254278	1201	CCGCACAAAAACGCGCCACC				1075		2708	CCGCACAAAATTGTGCCACC
16	20nt,	1319	+/100.00%	0		41	0.644885	3283	CCGCACAAAATCGCCCCACC				CCGCACAAAACGGCGCCAAC		1201	CCGCACAAAAACGCGCCACC
17	20nt,	1592	+/100.00%	0		42	1.24853	3371	CCGCACAAAATCGCGCCACC				1029		3283	CCGCACAAAATCGCCCCACC
18	20nt,	2295	+/100.00%	0		43	6.28313	1224	CCGCACGAAATCGTGCCACC				CCGCACAAAATAGCGCCAAC		3371	CCGCACAAAATCGCGCCACC
19	20nt,	5062	+/100.00%	0		44	0.32637	6051	CCGCACAAAATCGTGCCACC				2278		1224	CCGCACGAAATCGTGCCACC
20	20nt,	2567	+/100.00%	0		45	0.773061	1955	CCGCACAAAATAGTGCCACC				CCGCACAAAATAGCGCCAGC		6051	CCGCACAAAATCGTGCCACC
21	20nt,	2070	+/100.00%	0		46	0.140033	2948	CCGCACAAAATAGTCCCACC				1054		2036	CCGCACAAATTGTGCCACC
22	20nt,	1949	+/100.00%	0		47	1.30279	1273	CCGCACAGAATGGCTCGAAG	CCGCACGAAATCGTGCCAAC			CCGCACAAAATAGCGCGAAC		1020	CCGCACGAATCGTGCCACC
23	20nt,	1050	+/100.00%	0		48	0.037369	1765	CCGCACAAAATCGTGCCAAC				2183		1092	CCGCACTAATAGTGCCACC
24	20nt,	1991	+/100.00%	0		49	0.0925438	1652	CCGCACGAACTCGTGCCAAC				CCGCACAGAATGGCGCCAAC		1955	CCGCACAAAATAGTGCCACC
25	20nt,	9674	+/100.00%	0		50	0.176534	8338	CCGCACGAATTCGTGCCACC				1267		2948	CCGCACAAAATAGTCCCACC
26	20nt,	3399	+/100.00%	0		51	27.046	2499	CCGCACTAAATAGTGCCAAC				CCGCACAAAACAGCGCCAGC		1273	CCGCACGAAATCGTGCCAAC
27	20nt,	13193	+/100.00%	0		52	0.304393	2574	CCGCACAAAATAGTGCCAAC				1151		1765	CCGCACAAAATCGTGCCAAC
28	20nt,	1201	+/100.00%	0		53	0.145093	6853	CCGCACAAATGGCTCGAAG				CCGCACAAAAAAGAGCGCCAAC		1537	CCGCACTATTAGTGCCACC
29	20nt,	3721	+/100.00%	0		54	0.228893	1006	CCGCACAAATTGTGCCAAC				6177		1652	CCGCACGAACTCGTGCCAAC
30	20nt,	7048	+/100.00%	0		55	0.209563	3603	CCGCACAAATAGCGCCAAC				CCGCACAAAAAAAGAGCGCCAAC		8338	CCGCACGAATTCGTGCCACC
31	20nt,	5175	+/100.00%	0		56	0.0793535	2036	CCGCACAAATTGTGCCACC				3071		2499	CCGCACTAAATAGTGCCAAC
32	20nt,	1837	+/100.00%	0		57	1.1501	1020	CCGCACGAATCGTGCCACC				CCGCACAAAAGAGCGCCAAC		2574	CCGCACAAAATAGTGCCAAC
33	20nt,	1304	+/100.00%	0		58	0.199527	1092	CCGCACTAATAGTGCCACC				2423		1438	CCGCACTAATAGTGCCAAC
34	20nt,	3142	+/100.00%	0		59	0.0868273	1537	CCGCACTATTAGTGCCACC				CCGCACAAAAAAAAAGAGCGCCAAC		7671	CCGCACTAATAGTGCCAGC
35	20nt,	1374	+/100.00%	0		60	0.0999541	1438	CCGCACTAATAGTGCCAAC				1090		4609	CCGCACGAATCGTGCCATC
36	20nt,	1116	+/100.00%	0		61	0.162412	7671	CCGCACTAATAGTGCCAGC				CCGCACAAAATATCGCCAAC		1798	CCGCACAAACGTGCCACC
37	20nt,	5885	+/100.00%	0		62	0.0975828	4609	CCGCACGAATCGTGCCATC				1131			end
38	20nt,	4763	+/100.00%	0		63	0.0380677	1798	CCGCACAAACGTGCCACC				CCGCACAGAATAGCGCCAAC
39	20nt,	5335	+/100.00%	0		64	0	#N/A	#N/A				1149
40	20nt,	1799	+/100.00%	0		65	#N/A	#N/A	#N/A				CCGCACTAAATAGCGCCAAC
41	20nt,	5167	+/100.00%	0		66	#N/A	#N/A	#N/A				1076
42	20nt,	1189	+/100.00%	0		67	#N/A	#N/A	#N/A				CCGCACGAAATAGCGCCAAC
43	20nt,	10432	+/100.00%	0		68	#N/A	#N/A	#N/A				3603
44	20nt,	2781	+/100.00%	0		69	#N/A	#N/A	#N/A				CCGCACAAATAGCGCCAAC
45	20nt,	1000	+/100.00%	0		70	#N/A	#N/A	#N/A				1151
46	20nt,	5006	+/100.00%	0		71	#N/A	#N/A	#N/A				CCGCACAAATTAGCGCCATC
47	20nt,	2400	+/100.00%	0		72	#N/A	#N/A	#N/A				1055
48	20nt,	1718	+/100.00%	0		73	#N/A	#N/A	#N/A				CCGCACTAAATAGTGCCACC
49	20nt,	5846	+/100.00%	0		74	#N/A	#N/A	#N/A				3527
50	20nt,	5727	+/100.00%	0		75	#N/A	#N/A	#N/A				CCGCACAAATTAGAGCCAAC
51	20nt,	2616	+/100.00%	0		76	#N/A	#N/A	#N/A				1135
52	20nt,	1410	+/100.00%	0		77	#N/A	#N/A	#N/A				CCGCACTGAACAGTGCCAAC
53	20nt,	2401	+/100.00%	0		78	#N/A	#N/A	#N/A				1769
54	20nt,	1811	+/100.00%	0		79	#N/A	#N/A	#N/A				CCGCACAGAACTGTGCCACC
55	20nt,	3010	+/100.00%	0		80	#N/A	#N/A	#N/A				1208
56	20nt,	1034	+/100.00%	0		81	#N/A	#N/A	#N/A				CCGCACACAAGTGTGCCACC
57	20nt,	1214	+/100.00%	0		82	#N/A	#N/A	#N/A				2708
58	20nt,	2946	+/100.00%	0		83	#N/A	#N/A	#N/A				CCGCACAAAATTGTGCCACC
59	20nt,	2771	+/100.00%	0		84	#N/A	#N/A	#N/A				1201
60	20nt,	1303	+/100.00%	0		85	#N/A	#N/A	#N/A				CCGCACAAAAACGCGCCACC
61	20nt,	2938	+/100.00%	0		86	#N/A	#N/A	#N/A				3283
62	20nt,	8935	+/100.00%	0		87	#N/A	#N/A	#N/A				CCGCACAAAATCGCCCCACC
63	20nt,	1870	+/100.00%	0		88	#N/A	#N/A	#N/A				3371
64	20nt,	5339	+/100.00%	0		89	#N/A	#N/A	#N/A				CCGCACAAAATCGCGCCACC
65	20nt,	3490	+/100.00%	0		90	#N/A	#N/A	#N/A				1224
66	20nt,	1675	+/100.00%	0		91	#N/A	#N/A	#N/A				CCGCACGAAATCGTGCCACC
67	20nt,	1418	+/100.00%	0		92	#N/A	#N/A	#N/A				6051
68	20nt,	1078	+/100.00%	0		93	#N/A	#N/A	#N/A				CCGCACAAAATCGTGCCACC
69	20nt,	26029	+/100.00%	0		94	#N/A	#N/A	#N/A				2036
70	20nt,	2332	+/100.00%	0		95	#N/A	#N/A	#N/A				CCGCACAAATTGTGCCACC
71	20nt,	5198	+/100.00%	0		96	#N/A	#N/A	#N/A				1020
72	20nt,	2164	+/100.00%	0		97	#N/A	#N/A	#N/A				CCGCACGAATCGTGCCACC
73	20nt,	7528	+/100.00%	0		98	#N/A	#N/A	#N/A				1092
74	20nt,	1029	+/100.00%	0		99	#N/A	#N/A	#N/A				CCGCACTAATAGTGCCACC
75	20nt,	4949	+/100.00%	0		100	#N/A	#N/A	#N/A				1955
76	20nt,	2125	+/100.00%	0		101	#N/A	#N/A	#N/A				CCGCACAAAATAGTGCCACC
77	20nt,	1864	+/100.00%	0		102	#N/A	#N/A	#N/A				2948
78	20nt,	1813	+/100.00%	0		103	#N/A	#N/A	#N/A				CCGCACAAAATAGTCCCACC
79	20nt,	2384	+/100.00%	0		104	#N/A	#N/A	#N/A				1273
80	20nt,	1480	+/100.00%	0		105	#N/A	#N/A	#N/A				CCGCACGAAATCGTGCCAAC
81	20nt,	2521	+/100.00%	0		106	#N/A	#N/A	#N/A				1765
82	20nt,	1098	+/100.00%	0		107	#N/A	#N/A	#N/A				CCGCACAAAATCGTGCCAAC
83	20nt,	3905	+/100.00%	0		108	#N/A	#N/A	#N/A				1537
84	20nt,	2146	+/100.00%	0		109	#N/A	#N/A	#N/A				CCGCACTATTAGTGCCACC
85	20nt,	1186	+/100.00%	0		110	#N/A	#N/A	#N/A				1652
86	20nt,	12164	+/100.00%	0		111	#N/A	#N/A	#N/A				CCGCACGAACTCGTGCCAAC
87	20nt,	1379	+/100.00%	0		112	#N/A	#N/A	#N/A				8338
88	20nt,	10916	+/100.00%	0		113	#N/A	#N/A	#N/A				CCGCACGAATTCGTGCCACC
89	20nt,	1684	+/100.00%	0		114	#N/A	#N/A	#N/A				2499
90	20nt,	1073	+/100.00%	0		115	#N/A	#N/A	#N/A				CCGCACTAAATAGTGCCAAC
91	20nt,	3384	+/100.00%	0		116	#N/A	#N/A	#N/A				2574
92	20nt,	1135	+/100.00%	0		117	#N/A	#N/A	#N/A				CCGCACAAAATAGTGCCAAC
93	20nt,	1450	+/100.00%	0		118	#N/A	#N/A	#N/A				1438
94	20nt,	8648	+/100.00%	0		119	#N/A	#N/A	#N/A				CCGCACTAATAGTGCCAAC
95	20nt,	1603	+/100.00%	0		120	#N/A	#N/A	#N/A				7671
96	20nt,	2354	+/100.00%	0		121	#N/A	#N/A	#N/A				CCGCACTAATAGTGCCAGC
97	20nt,	1173	+/100.00%	0		122	#N/A	#N/A	#N/A				4609
98	20nt,	1052	+/100.00%	0		123	#N/A	#N/A	#N/A				CCGCACGAATCGTGCCATC
99	20nt,	4932	+/100.00%	0		124	#N/A	#N/A	#N/A				1798
100	20nt,	1725	+/100.00%	0		125	#N/A	#N/A	#N/A				CCGCACAAACGTGCCACC
101	20nt,	1101	+/100.00%	0		126	#N/A	#N/A	#N/A				end
102	20nt,	7623	+/100.00%	0		127	#N/A	#N/A	#N/A
103	20nt,	7199	+/100.00%	0		128	#N/A	#N/A	#N/A
104	20nt,	7057	+/100.00%	0		129	#N/A	#N/A	#N/A
105	20nt,	6765	+/100.00%	0		130	#N/A	#N/A	#N/A
106	20nt,	6514	+/100.00%	0		131	#N/A	#N/A	#N/A
107	20nt,	5621	+/100.00%	0		132	#N/A	#N/A	#N/A
108	20nt,	5591	+/100.00%	0		133	#N/A	#N/A	#N/A
109	20nt,	3104	+/100.00%	0		134	#N/A	#N/A	#N/A
110	20nt,	2976	+/100.00%	0		135	#N/A	#N/A	#N/A
111	20nt,	1978	+/100.00%	0		136	#N/A	#N/A	#N/A
112	20nt,	1902	+/100.00%	0		137	#N/A	#N/A	#N/A
113	20nt,	1893	+/100.00%	0		138	#N/A	#N/A	#N/A
114	20nt,	1891	+/100.00%	0		139	#N/A	#N/A	#N/A
115	20nt,	1817	+/100.00%	0		140	#N/A	#N/A	#N/A
116	20nt,	1720	+/100.00%	0		141	#N/A	#N/A	#N/A
117	20nt,	1616	+/100.00%	0		142	#N/A	#N/A	#N/A
118	20nt,	1575	+/100.00%	0		143	#N/A	#N/A	#N/A
119	20nt,	1510	+/100.00%	0		144	#N/A	#N/A	#N/A
120	20nt,	1407	+/100.00%	0		145	#N/A	#N/A	#N/A
121	20nt,	1385	+/100.00%	0		146	#N/A	#N/A	#N/A
122	20nt,	1132	+/100.00%	0		147	#N/A	#N/A	#N/A
123	20nt,	1105	+/100.00%	0		148	#N/A	#N/A	#N/A
124	20nt,	1093	+/100.00%	0		149	#N/A	#N/A	#N/A
125	20nt,	1020	+/100.00%	0		150	#N/A	#N/A	#N/A
126	20nt,	10931	+/100.00%	0		151	#N/A	#N/A	#N/A
127	20nt,	4260	+/100.00%	0		152	#N/A	#N/A	#N/A
128	20nt,	3666	+/100.00%	0		153	#N/A	#N/A	#N/A
129	20nt,	1161	+/100.00%	0		154	#N/A	#N/A	#N/A
130	20nt,	4329	+/100.00%	0		155	#N/A	#N/A	#N/A
131	20nt,	1710	+/100.00%	0		156	#N/A	#N/A	#N/A
132	20nt,	3127	+/100.00%	0		157	#N/A	#N/A	#N/A
133	20nt,	1696	+/100.00%	0		158	#N/A	#N/A	#N/A
134	20nt,	2731	+/100.00%	0		159	#N/A	#N/A	#N/A
135	20nt,	3535	+/100.00%	0		160	#N/A	#N/A	#N/A
136	20nt,	1195	+/100.00%	0		161	#N/A	#N/A	#N/A
137	20nt,	2418	+/100.00%	0		162	#N/A	#N/A	#N/A
138	20nt,	2287	+/100.00%	0		163	#N/A	#N/A	#N/A
139	20nt,	5544	+/100.00%	0		164	#N/A	#N/A	#N/A
140	20nt,	1641	+/100.00%	0		165	#N/A	#N/A	#N/A
141	20nt,	2216	+/100.00%	0		166	#N/A	#N/A	#N/A
142	20nt,	1020	+/100.00%	0		167	#N/A	#N/A	#N/A
143	20nt,	7070	+/100.00%	0		168	#N/A	#N/A	#N/A
144	20nt,	3161	+/100.00%	0		169	#N/A	#N/A	#N/A
145	20nt,	1188	+/100.00%	0		170	#N/A	#N/A	#N/A
146	20nt,	1944	+/100.00%	0		171	#N/A	#N/A	#N/A
147	20nt,	1975	+/100.00%	0		172	#N/A	#N/A	#N/A
148	20nt,	1421	+/100.00%	0		173	#N/A	#N/A	#N/A
149	20nt,	1098	+/100.00%	0		174	#N/A	#N/A	#N/A
150	20nt,	1414	+/100.00%	0		175	#N/A	#N/A	#N/A
151	20nt,	2107	+/100.00%	0		176	#N/A	#N/A	#N/A
152	20nt,	2643	+/100.00%	0		177	#N/A	#N/A	#N/A
153	20nt,	1273	+/100.00%	0		178	#N/A	#N/A	#N/A
154	20nt,	2351	+/100.00%	0		179	#N/A	#N/A	#N/A
155	20nt,	1352	+/100.00%	0		180	#N/A	#N/A	#N/A
156	20nt,	1299	+/100.00%	0		181	#N/A	#N/A	#N/A
157	20nt,	1243	+/100.00%	0		182	#N/A	#N/A	#N/A
158	20nt,	2079	+/100.00%	0		183	#N/A	#N/A	#N/A
159	20nt,	1527	+/100.00%	0		184	#N/A	#N/A	#N/A
160	20nt,	1051	+/100.00%	0		185	#N/A	#N/A	#N/A
161	20nt,	2849	+/100.00%	0		186	#N/A	#N/A	#N/A
162	20nt,	2251	+/100.00%	0		187	#N/A	#N/A	#N/A
163	20nt,	5220	+/100.00%	0		188	#N/A	#N/A	#N/A
164	20nt,	1380	+/100.00%	0		189	#N/A	#N/A	#N/A
165	20nt,	1567	+/100.00%	0		190	#N/A	#N/A	#N/A
166	20nt,	1470	+/100.00%	0		191	#N/A	#N/A	#N/A
167	20nt,	1194	+/100.00%	0		192	#N/A	#N/A	#N/A
168	20nt,	2582	+/100.00%	0		193	#N/A	#N/A	#N/A
169	20nt,	4629	+/100.00%	0		194	#N/A	#N/A	#N/A
170	20nt,	2773	+/100.00%	0		195	#N/A	#N/A	#N/A
171	20nt,	2865	+/100.00%	0		196	#N/A	#N/A	#N/A
172	20nt,	4547	+/100.00%	0		197	#N/A	#N/A	#N/A
173	20nt,	5685	+/100.00%	0		198	#N/A	#N/A	#N/A
174	20nt,	2434	+/100.00%	0		199	#N/A	#N/A	#N/A
175	20nt,	2065	+/100.00%	0		200	#N/A	#N/A	#N/A
176	20nt,	6281	+/100.00%	0
177	20nt,	2811	+/100.00%	0
178	20nt,	1788	+/100.00%	0
179	20nt,	1679	+/100.00%	0
180	20nt,	1923	+/100.00%	0
181	20nt,	2528	+/100.00%	0
182	20nt,	1075	+/100.00%	0
183	20nt,	2996	+/100.00%	0
184	20nt,	1260	+/100.00%	0
185	20nt,	1995	+/100.00%	0
186	20nt,	4059	+/100.00%	0
187	20nt,	1612	+/100.00%	0
188	20nt,	2099	+/100.00%	0
189	20nt,	1417	+/100.00%	0
190	20nt,	3138	+/100.00%	0
191	20nt,	1107	+/100.00%	0
192	20nt,	1803	+/100.00%	0
193	20nt,	8530	+/100.00%	0
194	20nt,	5130	+/100.00%	0
195	20nt,	7414	+/100.00%	0
196	20nt,	1079	+/100.00%	0
197	20nt,	1098	+/100.00%	0
198	20nt,	4270	+/100.00%	0
199	20nt,	1698	+/100.00%	0
200	20nt,	1934	+/100.00%	0
201	20nt,	1671	+/100.00%	0
202	20nt,	2284	+/100.00%	0
203	20nt,	1300	+/100.00%	0
204	20nt,	3297	+/100.00%	0
205	20nt,	3173	+/100.00%	0
206	20nt,	2045	+/100.00%	0
207	20nt,	4888	+/100.00%	0
208	20nt,	1866	+/100.00%	0
209	20nt,	1525	+/100.00%	0
210	20nt,	3985	+/100.00%	0
211	20nt,	3854	+/100.00%	0
212	20nt,	3324	+/100.00%	0
213	20nt,	3313	+/100.00%	0
214	20nt,	2987	+/100.00%	0
215	20nt,	2909	+/100.00%	0
216	20nt,	2849	+/100.00%	0
217	20nt,	2436	+/100.00%	0
218	20nt,	2256	+/100.00%	0
219	20nt,	1698	+/100.00%	0
220	20nt,	1535	+/100.00%	0
221	20nt,	1503	+/100.00%	0
222	20nt,	1300	+/100.00%	0
223	20nt,	1253	+/100.00%	0
224	20nt,	1194	+/100.00%	0
225	20nt,	1145	+/100.00%	0
226	20nt,	1140	+/100.00%	0
227	20nt,	1133	+/100.00%	0
228	20nt,	1084	+/100.00%	0
229	20nt,	1011	+/100.00%	0
230	20nt,	3396	+/100.00%	0
231	20nt,	1160	+/100.00%	0
232	20nt,	2829	+/100.00%	0
233	20nt,	3112	+/100.00%	0
234	20nt,	2638	+/100.00%	0
235	20nt,	6347	+/100.00%	0
236	20nt,	3420	+/100.00%	0
237	20nt,	1588	+/100.00%	0
238	20nt,	1420	+/100.00%	0
239	20nt,	3118	+/100.00%	0
240	20nt,	37564	+/100.00%	0
241	20nt,	1292	+/100.00%	0
Cluster 8				15348	0.324951
0	20nt,	2194		0
1	20nt,	3026	+/100.00%	0
2	20nt,	4998	+/100.00%	0
3	20nt,	1587	+/100.00%	0
4	20nt,	1330	+/100.00%	0
5	20nt,	1202	+/100.00%	0
6	20nt,	1011	+/100.00%	0
Cluster 9				9757	0.206577
0	20nt,	2183		0
1	20nt,	1227	+/100.00%	0
2	20nt,	6347	+/100.00%	0
Cluster 10				1273	0.0269522
0	20nt,	1273		0
Cluster 11				1710	0.0362045
0	20nt,	1710		0
Cluster 12				7703	0.16309
0	20nt,	7703		0
Cluster 13				2852	0.0603832
0	20nt,	1509		0
1	20nt,	1343	+/100.00%	0
Cluster 14				30885	0.653904
0	20nt,	2284		0
1	20nt,	10893	+/100.00%	0
2	20nt,	1134	+/100.00%	0
3	20nt,	16574	+/100.00%	0
Cluster 15				19687	0.416818
0	20nt,	2747		0
1	20nt,	1151	+/100.00%	0
2	20nt,	1198	+/100.00%	0
3	20nt,	1186	+/100.00%	0
4	20nt,	1952	+/100.00%	0
5	20nt,	1260	+/100.00%	0
6	20nt,	1536	+/100.00%	0
7	20nt,	3179	+/100.00%	0
8	20nt,	1157	+/100.00%	0
9	20nt,	2229	+/100.00%	0
10	20nt,	1070	+/100.00%	0
11	20nt,	1022	+/100.00%	0
Cluster 16				1187	0.0251314
0	20nt,	1187		0
Cluster 17				37879	0.801983
0	20nt,	10768		0
1	20nt,	8008	+/100.00%	0
2	20nt,	6456	+/100.00%	0
3	20nt,	3530	+/100.00%	0
4	20nt,	1784	+/100.00%	0
5	20nt,	1535	+/100.00%	0
6	20nt,	3496	+/100.00%	0
7	20nt,	2302	+/100.00%	0
Cluster 18				1166	0.0246868
0	20nt,	1166		0
Cluster 19				114758	2.42968
0	20nt,	2448		0
1	20nt,	1943	+/100.00%	0
2	20nt,	4188	+/100.00%	0
3	20nt,	4484	+/100.00%	0
4	20nt,	9305	+/100.00%	0
5	20nt,	8571	+/100.00%	0
6	20nt,	7927	+/100.00%	0
7	20nt,	5523	+/100.00%	0
8	20nt,	4142	+/100.00%	0
9	20nt,	2162	+/100.00%	0
10	20nt,	1440	+/100.00%	0
11	20nt,	1021	+/100.00%	0
12	20nt,	2570	+/100.00%	0
13	20nt,	2224	+/100.00%	0
14	20nt,	1900	+/100.00%	0
15	20nt,	1278	+/100.00%	0
16	20nt,	1951	+/100.00%	0
17	20nt,	5966	+/100.00%	0
18	20nt,	10032	+/100.00%	0
19	20nt,	11372	+/100.00%	0
20	20nt,	9875	+/100.00%	0
21	20nt,	8018	+/100.00%	0
22	20nt,	4613	+/100.00%	0
23	20nt,	1805	+/100.00%	0
Cluster 20				47346	1.00242
0	20nt,	1564		0
1	20nt,	1473	+/100.00%	0
2	20nt,	1006	+/100.00%	0
3	20nt,	29849	+/100.00%	0
4	20nt,	2385	+/100.00%	0
5	20nt,	1180	+/100.00%	0
6	20nt,	6123	+/100.00%	0
7	20nt,	3766	+/100.00%	0
Cluster 21				2091	0.0442711
0	20nt,	2091		0
Cluster 22				1075	0.0227601
0	20nt,	1075		0
Cluster 23				1169299	24.7567
0	20nt,	1029		0
1	20nt,	36315	+/100.00%	0
2	20nt,	32402	+/100.00%	0
3	20nt,	12696	+/100.00%	0
4	20nt,	4557	+/100.00%	0
5	20nt,	1443	+/100.00%	0
6	20nt,	1173	+/100.00%	0
7	20nt,	1916	+/100.00%	0
8	20nt,	1670	+/100.00%	0
9	20nt,	1115	+/100.00%	0
10	20nt,	3240	+/100.00%	0
11	20nt,	2245	+/100.00%	0
12	20nt,	7477	+/100.00%	0
13	20nt,	3351	+/100.00%	0
14	20nt,	59465	+/100.00%	0
15	20nt,	29450	+/100.00%	0
16	20nt,	7586	+/100.00%	0
17	20nt,	2156	+/100.00%	0
18	20nt,	1501	+/100.00%	0
19	20nt,	14583	+/100.00%	0
20	20nt,	7207	+/100.00%	0
21	20nt,	2153	+/100.00%	0
22	20nt,	1975	+/100.00%	0
23	20nt,	1137	+/100.00%	0
24	20nt,	3005	+/100.00%	0
25	20nt,	1110	+/100.00%	0
26	20nt,	1017	+/100.00%	0
27	20nt,	2763	+/100.00%	0
28	20nt,	2645	+/100.00%	0
29	20nt,	1899	+/100.00%	0
30	20nt,	1118	+/100.00%	0
31	20nt,	6468	+/100.00%	0
32	20nt,	3600	+/100.00%	0
33	20nt,	12056	+/100.00%	0
34	20nt,	3731	+/100.00%	0
35	20nt,	1933	+/100.00%	0
36	20nt,	1225	+/100.00%	0
37	20nt,	1458	+/100.00%	0
38	20nt,	1149	+/100.00%	0
39	20nt,	1074	+/100.00%	0
40	20nt,	1626	+/100.00%	0
41	20nt,	1458	+/100.00%	0
42	20nt,	1354	+/100.00%	0
43	20nt,	1195	+/100.00%	0
44	20nt,	1480	+/100.00%	0
45	20nt,	1286	+/100.00%	0
46	20nt,	1209	+/100.00%	0
47	20nt,	1162	+/100.00%	0
48	20nt,	1139	+/100.00%	0
49	20nt,	1090	+/100.00%	0
50	20nt,	1080	+/100.00%	0
51	20nt,	1057	+/100.00%	0
52	20nt,	1386	+/100.00%	0
53	20nt,	1076	+/100.00%	0
54	20nt,	1068	+/100.00%	0
55	20nt,	1008	+/100.00%	0
56	20nt,	1131	+/100.00%	0
57	20nt,	1005	+/100.00%	0
58	20nt,	3631	+/100.00%	0
59	20nt,	2960	+/100.00%	0
60	20nt,	2587	+/100.00%	0
61	20nt,	1749	+/100.00%	0
62	20nt,	2896	+/100.00%	0
63	20nt,	2356	+/100.00%	0
64	20nt,	1953	+/100.00%	0
65	20nt,	1221	+/100.00%	0
66	20nt,	1484	+/100.00%	0
67	20nt,	1469	+/100.00%	0
68	20nt,	1362	+/100.00%	0
69	20nt,	1073	+/100.00%	0
70	20nt,	2376	+/100.00%	0
71	20nt,	2339	+/100.00%	0
72	20nt,	1998	+/100.00%	0
73	20nt,	1710	+/100.00%	0
74	20nt,	1530	+/100.00%	0
75	20nt,	1164	+/100.00%	0
76	20nt,	2710	+/100.00%	0
77	20nt,	2691	+/100.00%	0
78	20nt,	2209	+/100.00%	0
79	20nt,	2046	+/100.00%	0
80	20nt,	1692	+/100.00%	0
81	20nt,	1420	+/100.00%	0
82	20nt,	1323	+/100.00%	0
83	20nt,	9738	+/100.00%	0
84	20nt,	9167	+/100.00%	0
85	20nt,	8033	+/100.00%	0
86	20nt,	7874	+/100.00%	0
87	20nt,	4813	+/100.00%	0
88	20nt,	4214	+/100.00%	0
89	20nt,	3290	+/100.00%	0
90	20nt,	2418	+/100.00%	0
91	20nt,	1572	+/100.00%	0
92	20nt,	1002	+/100.00%	0
93	20nt,	1234	+/100.00%	0
94	20nt,	2190	+/100.00%	0
95	20nt,	3479	+/100.00%	0
96	20nt,	5351	+/100.00%	0
97	20nt,	7677	+/100.00%	0
98	20nt,	7756	+/100.00%	0
99	20nt,	11755	+/100.00%	0
100	20nt,	17203	+/100.00%	0
101	20nt,	22490	+/100.00%	0
102	20nt,	33596	+/100.00%	0
103	20nt,	42940	+/100.00%	0
104	20nt,	64008	+/100.00%	0
105	20nt,	111020	+/100.00%	0
106	20nt,	160951	+/100.00%	0
107	20nt,	192548	+/100.00%	0
108	20nt,	10990	+/100.00%	0
109	20nt,	8593	+/100.00%	0
110	20nt,	6139	+/100.00%	0
111	20nt,	5645	+/100.00%	0
112	20nt,	5069	+/100.00%	0
113	20nt,	3339	+/100.00%	0
114	20nt,	2379	+/100.00%	0
115	20nt,	2099	+/100.00%	0
116	20nt,	1406	+/100.00%	0
117	20nt,	1199	+/100.00%	0
118	20nt,	1132	+/100.00%	0
119	20nt,	1073	+/100.00%	0
120	20nt,	1286	+/100.00%	0
121	20nt,	3217	+/100.00%	0
122	20nt,	2992	+/100.00%	0
123	20nt,	2467	+/100.00%	0
124	20nt,	2380	+/100.00%	0
125	20nt,	2002	+/100.00%	0
126	20nt,	1668	+/100.00%	0
127	20nt,	1352	+/100.00%	0
128	20nt,	1133	+/100.00%	0
129	20nt,	1149	+/100.00%	0
130	20nt,	2535	+/100.00%	0
131	20nt,	4230	+/100.00%	0
132	20nt,	1654	+/100.00%	0
Cluster 24				3320	0.0702918
0	20nt,	2278		0
1	20nt,	1042	+/100.00%	0
Cluster 25				40523	0.857962
0	20nt,	1054		0
1	20nt,	3693	+/100.00%	0
2	20nt,	1395	+/100.00%	0
3	20nt,	1127	+/100.00%	0
4	20nt,	1063	+/100.00%	0
5	20nt,	4471	+/100.00%	0
6	20nt,	5055	+/100.00%	0
7	20nt,	1042	+/100.00%	0
8	20nt,	1402	+/100.00%	0
9	20nt,	1713	+/100.00%	0
10	20nt,	7987	+/100.00%	0
11	20nt,	1272	+/100.00%	0
12	20nt,	1933	+/100.00%	0
13	20nt,	4405	+/100.00%	0
14	20nt,	2911	+/100.00%	0
Cluster 26				3274	0.0693179
0	20nt,	2183		0
1	20nt,	1091	+/100.00%	0
Cluster 27				1267	0.0268252
0	20nt,	1267		0
Cluster 28				17053	0.36105
0	20nt,	3071		0
1	20nt,	2348	+/100.00%	0
2	20nt,	1144	+/100.00%	0
3	20nt,	1969	+/100.00%	0
4	20nt,	1066	+/100.00%	0
5	20nt,	1812	+/100.00%	0
6	20nt,	3449	+/100.00%	0
7	20nt,	1062	+/100.00%	0
8	20nt,	1132	+/100.00%	0
Cluster 29				2090	0.04425
0	20nt,	1090		0
1	20nt,	1000	+/100.00%	0
Cluster 30				3207	0.0678993
0	20nt,	1131		0
1	20nt,	1069	+/100.00%	0
2	20nt,	1007	+/100.00%	0
Cluster 31				1149	0.0243269
0	20nt,	1149		0
Cluster 32				1076	0.0227813
0	20nt,	1076		0
Cluster 33				12111	0.256417
0	20nt,	1151		0
1	20nt,	1058	+/100.00%	0
2	20nt,	2244	+/100.00%	0
3	20nt,	1686	+/100.00%	0
4	20nt,	1570	+/100.00%	0
5	20nt,	1323	+/100.00%	0
6	20nt,	1713	+/100.00%	0
7	20nt,	1366	+/100.00%	0
Cluster 34				70595	1.49465
0	20nt,	1055		0
1	20nt,	1293	+/100.00%	0
2	20nt,	1652	+/100.00%	0
3	20nt,	6742	+/100.00%	0
4	20nt,	18543	+/100.00%	0
5	20nt,	1455	+/100.00%	0
6	20nt,	3640	+/100.00%	0
7	20nt,	3078	+/100.00%	0
8	20nt,	1743	+/100.00%	0
9	20nt,	6487	+/100.00%	0
10	20nt,	1787	+/100.00%	0
11	20nt,	17754	+/100.00%	0
12	20nt,	2987	+/100.00%	0
13	20nt,	2379	+/100.00%	0
Cluster 35				3527	0.0746744
0	20nt,	3527		0
Cluster 36				12260	0.259571
0	20nt,	1135		0
1	20nt,	1011	+/100.00%	0
2	20nt,	2104	+/100.00%	0
3	20nt,	2014	+/100.00%	0
4	20nt,	1339	+/100.00%	0
5	20nt,	1307	+/100.00%	0
6	20nt,	1267	+/100.00%	0
7	20nt,	1066	+/100.00%	0
8	20nt,	1017	+/100.00%	0
Cluster 37				53956	1.14237
0	20nt,	1769		0
1	20nt,	1408	+/100.00%	0
2	20nt,	1213	+/100.00%	0
3	20nt,	3742	+/100.00%	0
4	20nt,	3525	+/100.00%	0
5	20nt,	3320	+/100.00%	0
6	20nt,	2039	+/100.00%	0
7	20nt,	1197	+/100.00%	0
8	20nt,	25262	+/100.00%	0
9	20nt,	4570	+/100.00%	0
10	20nt,	4509	+/100.00%	0
11	20nt,	1402	+/100.00%	0
Cluster 38				1208	0.025576
0	20nt,	1208		0
Cluster 39				288323	6.10444
0	20nt,	2708		0
1	20nt,	1081	+/100.00%	0
2	20nt,	7624	+/100.00%	0
3	20nt,	1632	+/100.00%	0
4	20nt,	1646	+/100.00%	0
5	20nt,	1228	+/100.00%	0
6	20nt,	1409	+/100.00%	0
7	20nt,	1029	+/100.00%	0
8	20nt,	106552	+/100.00%	0
9	20nt,	77319	+/100.00%	0
10	20nt,	40150	+/100.00%	0
11	20nt,	20128	+/100.00%	0
12	20nt,	16956	+/100.00%	0
13	20nt,	5463	+/100.00%	0
14	20nt,	1946	+/100.00%	0
15	20nt,	1452	+/100.00%	0
Cluster 40				1201	0.0254278
0	20nt,	1201		0
Cluster 41				30459	0.644885
0	20nt,	3283		0
1	20nt,	2499	+/100.00%	0
2	20nt,	1311	+/100.00%	0
3	20nt,	20490	+/100.00%	0
4	20nt,	1295	+/100.00%	0
5	20nt,	1581	+/100.00%	0
Cluster 42				58970	1.24853
0	20nt,	3371		0
1	20nt,	6290	+/100.00%	0
2	20nt,	18337	+/100.00%	0
3	20nt,	15528	+/100.00%	0
4	20nt,	8516	+/100.00%	0
5	20nt,	3535	+/100.00%	0
6	20nt,	2112	+/100.00%	0
7	20nt,	1281	+/100.00%	0
Cluster 43				296763	6.28313
0	20nt,	1224		0
1	20nt,	2062	+/100.00%	0
2	20nt,	1062	+/100.00%	0
3	20nt,	1601	+/100.00%	0
4	20nt,	1263	+/100.00%	0
5	20nt,	1247	+/100.00%	0
6	20nt,	1239	+/100.00%	0
7	20nt,	1099	+/100.00%	0
8	20nt,	1075	+/100.00%	0
9	20nt,	1053	+/100.00%	0
10	20nt,	1591	+/100.00%	0
11	20nt,	138588	+/100.00%	0
12	20nt,	24677	+/100.00%	0
13	20nt,	3359	+/100.00%	0
14	20nt,	5072	+/100.00%	0
15	20nt,	2713	+/100.00%	0
16	20nt,	1845	+/100.00%	0
17	20nt,	1425	+/100.00%	0
18	20nt,	1061	+/100.00%	0
19	20nt,	2808	+/100.00%	0
20	20nt,	2606	+/100.00%	0
21	20nt,	2480	+/100.00%	0
22	20nt,	2242	+/100.00%	0
23	20nt,	1177	+/100.00%	0
24	20nt,	1049	+/100.00%	0
25	20nt,	2277	+/100.00%	0
26	20nt,	1014	+/100.00%	0
27	20nt,	1926	+/100.00%	0
28	20nt,	1822	+/100.00%	0
29	20nt,	1373	+/100.00%	0
30	20nt,	1337	+/100.00%	0
31	20nt,	1189	+/100.00%	0
32	20nt,	1092	+/100.00%	0
33	20nt,	2796	+/100.00%	0
34	20nt,	2439	+/100.00%	0
35	20nt,	1450	+/100.00%	0
36	20nt,	2526	+/100.00%	0
37	20nt,	1414	+/100.00%	0
38	20nt,	1089	+/100.00%	0
39	20nt,	2910	+/100.00%	0
40	20nt,	3514	+/100.00%	0
41	20nt,	3280	+/100.00%	0
42	20nt,	3013	+/100.00%	0
43	20nt,	2660	+/100.00%	0
44	20nt,	1924	+/100.00%	0
45	20nt,	1104	+/100.00%	0
46	20nt,	5989	+/100.00%	0
47	20nt,	5520	+/100.00%	0
48	20nt,	4224	+/100.00%	0
49	20nt,	3329	+/100.00%	0
50	20nt,	2470	+/100.00%	0
51	20nt,	1330	+/100.00%	0
52	20nt,	1000	+/100.00%	0
53	20nt,	8760	+/100.00%	0
54	20nt,	1699	+/100.00%	0
55	20nt,	3314	+/100.00%	0
56	20nt,	1717	+/100.00%	0
57	20nt,	1672	+/100.00%	0
58	20nt,	1427	+/100.00%	0
59	20nt,	1184	+/100.00%	0
60	20nt,	1618	+/100.00%	0
61	20nt,	1429	+/100.00%	0
62	20nt,	1213	+/100.00%	0
63	20nt,	1101	+/100.00%	0
Cluster 44				15415	0.32637
0	20nt,	6051		0
1	20nt,	1670	+/100.00%	0
2	20nt,	3118	+/100.00%	0
3	20nt,	2222	+/100.00%	0
4	20nt,	1072	+/100.00%	0
5	20nt,	1282	+/100.00%	0
Cluster 45				36513	0.773061
0	20nt,	1955		0
1	20nt,	1519	+/100.00%	0
2	20nt,	7767	+/100.00%	0
3	20nt,	4875	+/100.00%	0
4	20nt,	4568	+/100.00%	0
5	20nt,	2981	+/100.00%	0
6	20nt,	1754	+/100.00%	0
7	20nt,	3935	+/100.00%	0
8	20nt,	2609	+/100.00%	0
9	20nt,	1750	+/100.00%	0
10	20nt,	1696	+/100.00%	0
11	20nt,	1104	+/100.00%	0
Cluster 46				6614	0.140033
0	20nt,	2948		0
1	20nt,	2320	+/100.00%	0
2	20nt,	1346	+/100.00%	0
Cluster 47				61533	1.30279
0	20nt,	1273		0
1	20nt,	1933	+/100.00%	0
2	20nt,	1420	+/100.00%	0
3	20nt,	6469	+/100.00%	0
4	20nt,	1224	+/100.00%	0
5	20nt,	1331	+/100.00%	0
6	20nt,	47883	+/100.00%	0
Cluster 48				1765	0.037369
0	20nt,	1765		0
Cluster 49				4371	0.0925438
0	20nt,	1652		0
1	20nt,	1576	+/100.00%	0
2	20nt,	1143	+/100.00%	0
Cluster 50				8338	0.176534
0	20nt,	8338		0
Cluster 51				1277426	27.046
0	20nt,	2499		0
1	20nt,	1533	+/100.00%	0
2	20nt,	1186	+/100.00%	0
3	20nt,	4775	+/100.00%	0
4	20nt,	4314	+/100.00%	0
5	20nt,	2498	+/100.00%	0
6	20nt,	1190	+/100.00%	0
7	20nt,	2237	+/100.00%	0
8	20nt,	1989	+/100.00%	0
9	20nt,	1589	+/100.00%	0
10	20nt,	1358	+/100.00%	0
11	20nt,	4069	+/100.00%	0
12	20nt,	2573	+/100.00%	0
13	20nt,	2199	+/100.00%	0
14	20nt,	1724	+/100.00%	0
15	20nt,	1446	+/100.00%	0
16	20nt,	2156	+/100.00%	0
17	20nt,	1916	+/100.00%	0
18	20nt,	1445	+/100.00%	0
19	20nt,	1256	+/100.00%	0
20	20nt,	1748	+/100.00%	0
21	20nt,	1492	+/100.00%	0
22	20nt,	1071	+/100.00%	0
23	20nt,	1016	+/100.00%	0
24	20nt,	1618	+/100.00%	0
25	20nt,	1558	+/100.00%	0
26	20nt,	1112	+/100.00%	0
27	20nt,	1111	+/100.00%	0
28	20nt,	4736	+/100.00%	0
29	20nt,	4427	+/100.00%	0
30	20nt,	2748	+/100.00%	0
31	20nt,	1273	+/100.00%	0
32	20nt,	3430	+/100.00%	0
33	20nt,	3019	+/100.00%	0
34	20nt,	2392	+/100.00%	0
35	20nt,	2103	+/100.00%	0
36	20nt,	5381	+/100.00%	0
37	20nt,	3839	+/100.00%	0
38	20nt,	1908	+/100.00%	0
39	20nt,	1000	+/100.00%	0
40	20nt,	5282	+/100.00%	0
41	20nt,	4594	+/100.00%	0
42	20nt,	2097	+/100.00%	0
43	20nt,	4564	+/100.00%	0
44	20nt,	4039	+/100.00%	0
45	20nt,	2259	+/100.00%	0
46	20nt,	1021	+/100.00%	0
47	20nt,	2213	+/100.00%	0
48	20nt,	1896	+/100.00%	0
49	20nt,	1672	+/100.00%	0
50	20nt,	1575	+/100.00%	0
51	20nt,	1376	+/100.00%	0
52	20nt,	1468	+/100.00%	0
53	20nt,	1441	+/100.00%	0
54	20nt,	1124	+/100.00%	0
55	20nt,	1339	+/100.00%	0
56	20nt,	1330	+/100.00%	0
57	20nt,	1120	+/100.00%	0
58	20nt,	1039	+/100.00%	0
59	20nt,	4340	+/100.00%	0
60	20nt,	3783	+/100.00%	0
61	20nt,	2215	+/100.00%	0
62	20nt,	1516	+/100.00%	0
63	20nt,	1450	+/100.00%	0
64	20nt,	1103	+/100.00%	0
65	20nt,	1431	+/100.00%	0
66	20nt,	1239	+/100.00%	0
67	20nt,	1155	+/100.00%	0
68	20nt,	1139	+/100.00%	0
69	20nt,	1026	+/100.00%	0
70	20nt,	1023	+/100.00%	0
71	20nt,	1985	+/100.00%	0
72	20nt,	2220	+/100.00%	0
73	20nt,	3670	+/100.00%	0
74	20nt,	6714	+/100.00%	0
75	20nt,	6046	+/100.00%	0
76	20nt,	3748	+/100.00%	0
77	20nt,	1697	+/100.00%	0
78	20nt,	1230	+/100.00%	0
79	20nt,	2024	+/100.00%	0
80	20nt,	1684	+/100.00%	0
81	20nt,	1121	+/100.00%	0
82	20nt,	3505	+/100.00%	0
83	20nt,	3004	+/100.00%	0
84	20nt,	2632	+/100.00%	0
85	20nt,	1874	+/100.00%	0
86	20nt,	2260	+/100.00%	0
87	20nt,	1918	+/100.00%	0
88	20nt,	1371	+/100.00%	0
89	20nt,	1331	+/100.00%	0
90	20nt,	3343	+/100.00%	0
91	20nt,	3008	+/100.00%	0
92	20nt,	2170	+/100.00%	0
93	20nt,	2057	+/100.00%	0
94	20nt,	1046	+/100.00%	0
95	20nt,	3333	+/100.00%	0
96	20nt,	2844	+/100.00%	0
97	20nt,	2176	+/100.00%	0
98	20nt,	1971	+/100.00%	0
99	20nt,	1041	+/100.00%	0
100	20nt,	17974	+/100.00%	0
101	20nt,	15262	+/100.00%	0
102	20nt,	12479	+/100.00%	0
103	20nt,	9723	+/100.00%	0
104	20nt,	4485	+/100.00%	0
105	20nt,	2092	+/100.00%	0
106	20nt,	2072	+/100.00%	0
107	20nt,	1105	+/100.00%	0
108	20nt,	16476	+/100.00%	0
109	20nt,	13613	+/100.00%	0
110	20nt,	11393	+/100.00%	0
111	20nt,	8665	+/100.00%	0
112	20nt,	3987	+/100.00%	0
113	20nt,	1988	+/100.00%	0
114	20nt,	1942	+/100.00%	0
115	20nt,	1015	+/100.00%	0
116	20nt,	1255	+/100.00%	0
117	20nt,	1397	+/100.00%	0
118	20nt,	2845	+/100.00%	0
119	20nt,	5828	+/100.00%	0
120	20nt,	11099	+/100.00%	0
121	20nt,	11635	+/100.00%	0
122	20nt,	20521	+/100.00%	0
123	20nt,	37522	+/100.00%	0
124	20nt,	73163	+/100.00%	0
125	20nt,	74403	+/100.00%	0
126	20nt,	105033	+/100.00%	0
127	20nt,	118715	+/100.00%	0
128	20nt,	1438	+/100.00%	0
129	20nt,	2185	+/100.00%	0
130	20nt,	3036	+/100.00%	0
131	20nt,	4012	+/100.00%	0
132	20nt,	4866	+/100.00%	0
133	20nt,	4874	+/100.00%	0
134	20nt,	4061	+/100.00%	0
135	20nt,	3425	+/100.00%	0
136	20nt,	2675	+/100.00%	0
137	20nt,	1253	+/100.00%	0
138	20nt,	1274	+/100.00%	0
139	20nt,	1212	+/100.00%	0
140	20nt,	3126	+/100.00%	0
141	20nt,	3048	+/100.00%	0
142	20nt,	2313	+/100.00%	0
143	20nt,	1945	+/100.00%	0
144	20nt,	1204	+/100.00%	0
145	20nt,	1041	+/100.00%	0
146	20nt,	4328	+/100.00%	0
147	20nt,	1025	+/100.00%	0
148	20nt,	2391	+/100.00%	0
149	20nt,	6719	+/100.00%	0
150	20nt,	5947	+/100.00%	0
151	20nt,	3339	+/100.00%	0
152	20nt,	1571	+/100.00%	0
153	20nt,	1333	+/100.00%	0
154	20nt,	1014	+/100.00%	0
155	20nt,	1774	+/100.00%	0
156	20nt,	2105	+/100.00%	0
157	20nt,	1555	+/100.00%	0
158	20nt,	2670	+/100.00%	0
159	20nt,	2903	+/100.00%	0
160	20nt,	1303	+/100.00%	0
161	20nt,	1827	+/100.00%	0
162	20nt,	3128	+/100.00%	0
163	20nt,	9030	+/100.00%	0
164	20nt,	19864	+/100.00%	0
165	20nt,	28264	+/100.00%	0
166	20nt,	62207	+/100.00%	0
167	20nt,	107026	+/100.00%	0
168	20nt,	117886	+/100.00%	0
169	20nt,	8713	+/100.00%	0
170	20nt,	8516	+/100.00%	0
171	20nt,	5093	+/100.00%	0
172	20nt,	2546	+/100.00%	0
173	20nt,	1848	+/100.00%	0
Cluster 52				14377	0.304393
0	20nt,	2574		0
1	20nt,	2322	+/100.00%	0
2	20nt,	1781	+/100.00%	0
3	20nt,	1597	+/100.00%	0
4	20nt,	2444	+/100.00%	0
5	20nt,	2230	+/100.00%	0
6	20nt,	1429	+/100.00%	0
Cluster 53				6853	0.145093
0	19nt,	6853		0
Cluster 54				10811	0.228893
0	19nt,	1006		0
1	19nt,	1739	+/100.00%	0
2	19nt,	8066	+/100.00%	0
Cluster 55				9898	0.209563
0	19nt,	3603		0
1	19nt,	3015	+/100.00%	0
2	19nt,	2063	+/100.00%	0
3	19nt,	1217	+/100.00%	0
Cluster 56				3748	0.0793535
0	19nt,	2036		0
1	19nt,	1712	+/100.00%	0
Cluster 57				54321	1.1501
0	19nt,	1020		0
1	19nt,	3830	+/100.00%	0
2	19nt,	1791	+/100.00%	0
3	19nt,	1500	+/100.00%	0
4	19nt,	1378	+/100.00%	0
5	19nt,	1189	+/100.00%	0
6	19nt,	43613	+/100.00%	0
Cluster 58				9424	0.199527
0	19nt,	1092		0
1	19nt,	2200	+/100.00%	0
2	19nt,	1921	+/100.00%	0
3	19nt,	1873	+/100.00%	0
4	19nt,	1193	+/100.00%	0
5	19nt,	1145	+/100.00%	0
Cluster 59				4101	0.0868273
0	19nt,	1537		0
1	19nt,	1367	+/100.00%	0
2	19nt,	1197	+/100.00%	0
Cluster 60				4721	0.0999541
0	19nt,	1438		0
1	19nt,	1628	+/100.00%	0
2	19nt,	1655	+/100.00%	0
Cluster 61				7671	0.162412
0	19nt,	7671		0
Cluster 62				4609	0.0975828
0	19nt,	4609		0
Cluster 63				1798	0.0380677
0	18nt,	1798		0
Cluster 64

## Sheet: R12
Cluster 0				7094	0.0526803	Cluster % Total	Reads
0	25nt,	3535	+/100.00%	0		100	13466144						3078		3078	CCGCACAATATAGCGCCATC
1	25nt,	1932	+/100.00%	0		Cluster	Representation	Representative	Sequence	Alt Sequence 1	Alt Sequence 2	Alt Sequence 3	CCGCACAATATAGCGCCATC		4128	CCGCACGAAATGGCTCGAAG
2	26nt,	1627		0		0	0.0526803	1627	CCGCACAAAAAAAAAAGAGCGCCAAC				4128		10767	CCGCACAAATGGCTCGAAG
Cluster 1				23737	0.176272	1	0.176272	5130	CCGCACAAAAAAAAGAGCGCCAAC				CCGCACGAAATGGCTCGAAG		2246	CCGCACAAAATGGCTCGAAG
0	23nt,	7149	+/100.00%	0		2	0.0106712	1437	CCGCACAAAAAAATAGCGCCAAC				10767		3434	CCGCACAAAATGGCTCGAGG
1	24nt,	5130		0		3	0.0105301	1418	CCGCACAAAAAATAGCGCCAAC				CCGCACAAATGGCTCGAAG		2330	CCGCACAAGATGGCTCGAAG
2	23nt,	4421	+/100.00%	0		4	0.0970285	1214	CCGCACAAAAAAGAGCGCCAAC				2246		1502	CCGCACAAAATGACTCGAAG
3	24nt,	2901	+/100.00%	0		5	0.0331944	1289	CCGCACAAAAATAGCGCCAAC				CCGCACAAAATGGCTCGAAG		1167	CCGCACAAAATAGCGCCAAC
4	23nt,	1734	+/100.00%	0		6	0.0641535	1641	CCGCACTAAATAGTGCCCAAC				3434		1457	CCGCACAAAGTAGCGCCATC
5	23nt,	1334	+/100.00%	0		7	0.0247287	1896	CCGCACAAAAATTGTGCCACC				CCGCACAAAATGGCTCGAGG		1188	CCGCACAAAATAGCGCCATC
6	24nt,	1068	+/100.00%	0		8	0.0228573	3078	CCGCACAATATAGCGCCATC				2330		1124	CCGCACAAAATATCGCCATC
Cluster 2				1437	0.0106712	9	0.150266	4128	CCGCACGAAATGGCTCGAAG				CCGCACAAGATGGCTCGAAG		1759	CCGCACAAAATAGCTCCATC
0	23nt,	1437		0		10	7.06209	2246	CCGCACAAAATGGCTCGAAG				1502		2702	CCGCACTAAATAGCGCCATC
Cluster 3				1418	0.0105301	11	0.110655	3434	CCGCACAAAATGGCTCGAGG				CCGCACAAAATGACTCGAAG		1999	CCGCACGAAATAGCGCCATC
0	22nt,	1418		0		12	0.0609157	2330	CCGCACAAGATGGCTCGAAG				1167		1054	CCGCACAAATAGCGCCATC
Cluster 4				13066	0.0970285	13	0.0111539	1502	CCGCACAAAATGACTCGAAG				CCGCACAAAATAGCGCCAAC		3781	CCGCACAAATTAGAGCCAAC
0	22nt,	1214		0		14	7.21773	1167	CCGCACAAAATAGCGCCAAC				1457		1222	CCGCACAAAAGAGCGCCAAC
1	22nt,	5552	+/100.00%	0		15	0.0188101	1457	CCGCACAAAGTAGCGCCATC				CCGCACAAAGTAGCGCCATC		14801	CCGCACAAAATTGTGCCAAC
2	22nt,	3600	+/100.00%	0		16	2.07536	1188	CCGCACAAAATAGCGCCATC				1188		2245	CCGCACAAATTGTGCCAAC
3	22nt,	1567	+/100.00%	0		17	0.00834686	1124	CCGCACAAAATATCGCCATC				CCGCACAAAATAGCGCCATC		1365	CCGCACGAACTCGTGCCACC
4	22nt,	1133	+/100.00%	0		18	0.0304616	1759	CCGCACAAAATAGCTCCATC				1124		1475	CCGCACAAAATACGCCAAC
Cluster 5				4470	0.0331944	19	0.0489153	2702	CCGCACTAAATAGCGCCATC				CCGCACAAAATATCGCCATC		2949	CCGCACAGAACTGTGCCACC
0	21nt,	1289		0		20	0.0352959	1999	CCGCACGAAATAGCGCCATC				1759		3376	CCGCACAAAATGGCGCCAAC
1	21nt,	1577	+/100.00%	0		21	0.0280778	3781	CCGCACAAATTAGAGCCAAC				CCGCACAAAATAGCTCCATC		1437	CCGCACAAAAAAATAGCGCCAAC
2	21nt,	1604	+/100.00%	0		22	0.0645099	1222	CCGCACAAAAGAGCGCCAAC	CCGCACTAAATCGTGCCAAC			2702		1418	CCGCACAAAAAATAGCGCCAAC
Cluster 6				8639	0.0641535	23	0.23063	14801	CCGCACAAAATTGTGCCAAC				CCGCACTAAATAGCGCCATC		3704	CCGCACAAAATAGCGCGAAC
0	21nt,	1641		0		24	0.0195082	1365	CCGCACGAACTCGTGCCACC				1999		1287	CCGCACTGAACAGTGCCAAC
1	21nt,	1321	+/100.00%	0		25	0.675011	2949	CCGCACAGAACTGTGCCACC				CCGCACGAAATAGCGCCATC		10030	CCGCACTAAATAGTGCCAAC
2	21nt,	1258	+/100.00%	0		26	0.158902	3376	CCGCACAAAATGGCGCCAAC				1054		2928	CCGCACAGAACTGTGCCAAC
3	21nt,	1968	+/100.00%	0		27	0.149167	3704	CCGCACAAAATAGCGCGAAC				CCGCACAAATAGCGCCATC		1435	CCGCACAAACAAGCGCCAAC
4	21nt,	2451	+/100.00%	0		28	0.2866	1287	CCGCACTGAACAGTGCCAAC				3781		1577	CCGCACACAAGTGTGCCACC
Cluster 7				3330	0.0247287	29	45.2221	10030	CCGCACTAAATAGTGCCAAC				CCGCACAAATTAGAGCCAAC		1402	CCGCACGAAATAGCGCCAAC
0	21nt,	1896		0		30	0.0922536	2928	CCGCACAGAACTGTGCCAAC				1222		1519	CCGCACTAAATAGCGCCAAC
1	21nt,	1434	+/100.00%	0		31	0.208686	1435	CCGCACAAACAAGCGCCAAC				CCGCACAAAAGAGCGCCAAC		1388	CCGCACAAAATATCGCCAAC
Cluster 8				3078	0.0228573	32	0.028813	1577	CCGCACACAAGTGTGCCACC				14801		1306	CCGCACAAAATAGCGCTAAC
0	20nt,	3078		0		33	0.0530219	1402	CCGCACGAAATAGCGCCAAC				CCGCACAAAATTGTGCCAAC		1856	CCGCACAAAATAGCGCCGAC
Cluster 9				20235	0.150266	34	0.0847162	1519	CCGCACTAAATAGCGCCAAC				2245		8205	CCGCACAAAATAGCGCCAGC
0	20nt,	4128		0		35	0.0103073	1388	CCGCACAAAATATCGCCAAC				CCGCACAAATTGTGCCAAC		1289	CCGCACAAAAATAGCGCCAAC
1	20nt,	2839	+/100.00%	0		36	0.0096984	1306	CCGCACAAAATAGCGCTAAC				1365		1035	CCGCACAAATAGCGCCAAC
2	20nt,	1246	+/100.00%	0		37	0.0240084	1856	CCGCACAAAATAGCGCCGAC				CCGCACGAACTCGTGCCACC		1119	CCGCACTAATAGTGCCACC
3	20nt,	10946	+/100.00%	0		38	0.114294	8205	CCGCACAAAATAGCGCCAGC				1475		1565	CCGCACTATTAGTGCCACC
4	20nt,	1076	+/100.00%	0		39	1.59388	1045	CCGCACTAAATAGTGCCACC				CCGCACAAAATACGCCAAC		1045	CCGCACTAAATAGTGCCACC
Cluster 10				950991	7.06209	40	0.0689136	1279	CCGCACGAAATAGTGCCAAC				2949		1279	CCGCACGAAATAGTGCCAAC
0	20nt,	2246		0		41	0.202797	2700	CCGCACAAAATAGTGCCAAC				CCGCACAGAACTGTGCCACC		2700	CCGCACAAAATAGTGCCAAC
1	20nt,	7148	+/100.00%	0		42	0.0155427	1085	CCGCACTAAGTAGTGCCAAC				3376		1641	CCGCACTAAATAGTGCCCAAC
2	20nt,	1225	+/100.00%	0		43	0.0181344	1281	CCGCACTAACTAGTGCCAAC				CCGCACAAAATGGCGCCAAC		4402	CCGCACTAATAGTGCCAAC
3	20nt,	1063	+/100.00%	0		44	0.0205924	1389	CCGCACTAGATAGTGCCAAC				1437		1085	CCGCACTAAGTAGTGCCAAC
4	20nt,	2850	+/100.00%	0		45	0.123458	12449	CCGCACGAATTCGTGCCACC				CCGCACAAAAAAATAGCGCCAAC		1281	CCGCACTAACTAGTGCCAAC
5	20nt,	1652	+/100.00%	0		46	0.131188	1521	CCGCACTAAATCGTGCCACC				1418		1389	CCGCACTAGATAGTGCCAAC
6	20nt,	1509	+/100.00%	0		47	0.439109	1229	CCGCACAAAATCGTGCCACC				CCGCACAAAAAATAGCGCCAAC		12449	CCGCACGAATTCGTGCCACC
7	20nt,	6680	+/100.00%	0		48	13.6399	1929	CCGCACGAAATCGTGCCACC				3704		1129	CCGCACGATTCGTGCCACC
8	20nt,	14730	+/100.00%	0		49	0.101261	1081	CCGCACAAAATAGTGCCACC				CCGCACAAAATAGCGCGAAC		1034	CCGCACGAATCGTGCCACC
9	20nt,	1097	+/100.00%	0		50	0.107923	4114	CCGCACGAACTCGTGCCAAC				1287		1521	CCGCACTAAATCGTGCCACC
10	20nt,	1523	+/100.00%	0		51	1.05154	1409	CCGCACGAAATCGTGCCAAC				CCGCACTGAACAGTGCCAAC		1229	CCGCACAAAATCGTGCCACC
11	20nt,	3338	+/100.00%	0		52	0.00907461	1222	CCGCACAAAAGAGCGCCAAC	CCGCACTAAATCGTGCCAAC			10030		7677	CCGCACGAATCGTGCCATC
12	20nt,	1210	+/100.00%	0		53	0.0190998	2572	CCGCACAAAATCGTGCCAAC				CCGCACTAAATAGTGCCAAC		12316	CCGCACTAATAGTGCCAGC
13	20nt,	1312	+/100.00%	0		54	0.33836	5765	CCGCACAAAATCGCGCCAAC				2928		1057	CCGCACAAACGTGCCACC
14	20nt,	1145	+/100.00%	0		55	0.271013	22941	CCGCACAAAATCGCCCCACC				CCGCACAGAACTGTGCCAAC		1929	CCGCACGAAATCGTGCCACC
15	20nt,	10619	+/100.00%	0		56	13.6963	1292	CCGCACAAAATTGTGCCACC				1435		1081	CCGCACAAAATAGTGCCACC
16	20nt,	3788	+/100.00%	0		57	0.00854736	1151	CCGCACAAAGTTGTGCCACC				CCGCACAAACAAGCGCCAAC		4114	CCGCACGAACTCGTGCCAAC
17	20nt,	14698	+/100.00%	0		58	0.00755227	1017	CCGCACAAAATTGTTCCACC				1577		1409	CCGCACGAAATCGTGCCAAC
18	20nt,	1433	+/100.00%	0		59	0.0192854	1477	CCGCACAAGATTGTGCCACC				CCGCACACAAGTGTGCCACC		1222	CCGCACTAAATCGTGCCAAC
19	20nt,	1065	+/100.00%	0		60	0.0290878	2315	CCGCACAAAATTGTGCCGCC				1402		2572	CCGCACAAAATCGTGCCAAC
20	20nt,	1120	+/100.00%	0		61	0.031828	2461	CCGCACAAATTTGTGCCACC				CCGCACGAAATAGCGCCAAC		1323	CCGCACGAATCGTGCCAAC
21	20nt,	3247	+/100.00%	0		62	0.0448607	2792	CCGCACAGAATTGTGCCACC				1519		5765	CCGCACAAAATCGCGCCAAC
22	20nt,	2983	+/100.00%	0		63	0.149887	2819	CCGCACTAAATTGTGCCACC				CCGCACTAAATAGCGCCAAC		22941	CCGCACAAAATCGCCCCACC
23	20nt,	1944	+/100.00%	0		64	0.217501	10185	CCGCACGAAATTGTGCCACC				1388		1292	CCGCACAAAATTGTGCCACC
24	20nt,	1022	+/100.00%	0		65	0.0086439	1164	CCGCACAAAATTGCGCCACC				CCGCACAAAATATCGCCAAC		1151	CCGCACAAAGTTGTGCCACC
25	20nt,	5156	+/100.00%	0		66	0.0104187	1403	CCGCACGAAGTCGTGCCACC				1306		1017	CCGCACAAAATTGTTCCACC
26	20nt,	1670	+/100.00%	0		67	0.00889638	1198	CCGCACGAAATCGTCCCACC				CCGCACAAAATAGCGCTAAC		1477	CCGCACAAGATTGTGCCACC
27	20nt,	8490	+/100.00%	0		68	0.0101143	1362	CCGCACGAAATCGTTCCACC				1856		2315	CCGCACAAAATTGTGCCGCC
28	20nt,	2729	+/100.00%	0		69	0.0270159	2309	CCGCACAAAAACGCGCCACC				CCGCACAAAATAGCGCCGAC		2461	CCGCACAAATTTGTGCCACC
29	20nt,	2728	+/100.00%	0		70	0.0186096	2506	CCGCACGAGATCGTGCCACC				8205		2792	CCGCACAGAATTGTGCCACC
30	20nt,	1880	+/100.00%	0		71	0.00954245	1285	CCGCACAGAATCGTGCCACC				CCGCACAAAATAGCGCCAGC		2819	CCGCACTAAATTGTGCCACC
31	20nt,	1333	+/100.00%	0		72	0.0208746	2811	CCGCACGAAATCGTGCCGCC				1289		10185	CCGCACGAAATTGTGCCACC
32	20nt,	1990	+/100.00%	0		73	0.0181418	2443	CCGCACGAAATCTTGCCACC				CCGCACAAAAATAGCGCCAAC		15245	CCGCACAAATTGTGCCACC
33	20nt,	2653	+/100.00%	0		74	0.0117406	1581	CCGCACGAAACCGTGCCACC				1035		1164	CCGCACAAAATTGCGCCACC
34	20nt,	2083	+/100.00%	0		75	0.0106118	1429	CCGCACGAAATCGCGCCACC				CCGCACAAATAGCGCCAAC		1161	CCGCACAAAATTGCCACC
35	20nt,	3824	+/100.00%	0		76	0.00960186	1293	CCGCACGAAATCGTGCCACT				1119		1896	CCGCACAAAAATTGTGCCACC
36	20nt,	10908	+/100.00%	0		77	0.357073	1968	CCGCACAAAATCGCGCCACC				CCGCACTAATAGTGCCACC		1403	CCGCACGAAGTCGTGCCACC
37	20nt,	10662	+/100.00%	0		78	0.0147927	1992	CCGCACGGAATCGTGCCACC				1565		1198	CCGCACGAAATCGTCCCACC
38	20nt,	6078	+/100.00%	0		79	0.012654	1704	CCGCACAAAGATGTGCCACC				CCGCACTATTAGTGCCACC		1362	CCGCACGAAATCGTTCCACC
39	20nt,	1191	+/100.00%	0		80	0.0714978	1296	CCGCACAAAATAGTCCCACC				1045		2309	CCGCACAAAAACGCGCCACC
40	20nt,	7609	+/100.00%	0		81	0.0108717	1464	CCGCACGAAACGGCGCCAAC				CCGCACTAAATAGTGCCACC		2506	CCGCACGAGATCGTGCCACC
41	20nt,	1586	+/100.00%	0		82	0.0527917	2777	CCGCACAGAAGCGCGCCAAC				1279		1285	CCGCACAGAATCGTGCCACC
42	20nt,	10959	+/100.00%	0		83	0.00914887	1232	CCGCACAAAGTCGCGCCAAC				CCGCACGAAATAGTGCCAAC		2811	CCGCACGAAATCGTGCCGCC
43	20nt,	2116	+/100.00%	0		84	0.0147481	1986	CCGCACAGAATCGCGCCAAC				2700		2443	CCGCACGAAATCTTGCCACC
44	20nt,	1513	+/100.00%	0		85	0.00919343	1238	CCGCACAAATTAGCGCCATC				CCGCACAAAATAGTGCCAAC		1581	CCGCACGAAACCGTGCCACC
45	20nt,	2629	+/100.00%	0		86	0.110158	10767	CCGCACAAATGGCTCGAAG				1641		1429	CCGCACGAAATCGCGCCACC
46	20nt,	11902	+/100.00%	0		87	0.00782704	1054	CCGCACAAATAGCGCCATC				CCGCACTAAATAGTGCCCAAC		1293	CCGCACGAAATCGTGCCACT
47	20nt,	1778	+/100.00%	0		88	0.0941249	2245	CCGCACAAATTGTGCCAAC				4402		1968	CCGCACAAAATCGCGCCACC
48	20nt,	2906	+/100.00%	0		89	0.0109534	1475	CCGCACAAAATACGCCAAC				CCGCACTAATAGTGCCAAC		1992	CCGCACGGAATCGTGCCACC
49	20nt,	1781	+/100.00%	0		90	0.0151937	1035	CCGCACAAATAGCGCCAAC				1085		1086	CCGCACAAATCGTGCCACC
50	20nt,	23457	+/100.00%	0		91	0.110143	1119	CCGCACTAATAGTGCCACC				CCGCACTAAGTAGTGCCAAC		1704	CCGCACAAAGATGTGCCACC
51	20nt,	1361	+/100.00%	0		92	0.0324518	1565	CCGCACTATTAGTGCCACC				1281		1296	CCGCACAAAATAGTCCCACC
52	20nt,	5661	+/100.00%	0		93	0.280036	4402	CCGCACTAATAGTGCCAAC				CCGCACTAACTAGTGCCAAC		2038	CCGCACAAATGTGCCACC
53	20nt,	2032	+/100.00%	0		94	0.00838399	1129	CCGCACGATTCGTGCCACC				1389		2101	CCGCACAAAATGTGCCACC
54	20nt,	3944	+/100.00%	0		95	0.804306	1034	CCGCACGAATCGTGCCACC				CCGCACTAGATAGTGCCAAC		1214	CCGCACAAAAAAGAGCGCCAAC
55	20nt,	1141	+/100.00%	0		96	0.0570096	7677	CCGCACGAATCGTGCCATC				12449		5130	CCGCACAAAAAAAAGAGCGCCAAC
56	20nt,	6629	+/100.00%	0		97	0.0996425	12316	CCGCACTAATAGTGCCAGC				CCGCACGAATTCGTGCCACC		1627	CCGCACAAAAAAAAAAGAGCGCCAAC
57	20nt,	3285	+/100.00%	0		98	0.00982464	1323	CCGCACGAATCGTGCCAAC				1129		1464	CCGCACGAAACGGCGCCAAC
58	20nt,	2090	+/100.00%	0		99	0.334973	15245	CCGCACAAATTGTGCCACC				CCGCACGATTCGTGCCACC		2777	CCGCACAGAAGCGCGCCAAC
59	20nt,	2956	+/100.00%	0		100	0.00806467	1086	CCGCACAAATCGTGCCACC				1034		1232	CCGCACAAAGTCGCGCCAAC
60	20nt,	1267	+/100.00%	0		101	0.0236148	2101	CCGCACAAAATGTGCCACC				CCGCACGAATCGTGCCACC		1986	CCGCACAGAATCGCGCCAAC
61	20nt,	8702	+/100.00%	0		102	0.0595271	2483	CCGCACAGAGCGCGCCAAC				1521		2483	CCGCACAGAGCGCGCCAAC
62	20nt,	8570	+/100.00%	0		103	0.00784931	1057	CCGCACAAACGTGCCACC				CCGCACTAAATCGTGCCACC		1238	CCGCACAAATTAGCGCCATC
63	20nt,	3669	+/100.00%	0		104	0.00862162	1161	CCGCACAAAATTGCCACC				1229			end
64	20nt,	2160	+/100.00%	0		105	0.0612573	2038	CCGCACAAATGTGCCACC				CCGCACAAAATCGTGCCACC
65	20nt,	1929	+/100.00%	0		106	0	#N/A	#N/A				7677
66	20nt,	2056	+/100.00%	0		107	#N/A	#N/A	#N/A				CCGCACGAATCGTGCCATC
67	20nt,	2626	+/100.00%	0		108	#N/A	#N/A	#N/A				12316
68	20nt,	1067	+/100.00%	0		109	#N/A	#N/A	#N/A				CCGCACTAATAGTGCCAGC
69	20nt,	15389	+/100.00%	0		110	#N/A	#N/A	#N/A				1057
70	20nt,	1210	+/100.00%	0		111	#N/A	#N/A	#N/A				CCGCACAAACGTGCCACC
71	20nt,	1490	+/100.00%	0		112	#N/A	#N/A	#N/A				1929
72	20nt,	4818	+/100.00%	0		113	#N/A	#N/A	#N/A				CCGCACGAAATCGTGCCACC
73	20nt,	3651	+/100.00%	0		114	#N/A	#N/A	#N/A				1081
74	20nt,	1267	+/100.00%	0		115	#N/A	#N/A	#N/A				CCGCACAAAATAGTGCCACC
75	20nt,	3173	+/100.00%	0		116	#N/A	#N/A	#N/A				4114
76	20nt,	2573	+/100.00%	0		117	#N/A	#N/A	#N/A				CCGCACGAACTCGTGCCAAC
77	20nt,	5461	+/100.00%	0		118	#N/A	#N/A	#N/A				1409
78	20nt,	2187	+/100.00%	0		119	#N/A	#N/A	#N/A				CCGCACGAAATCGTGCCAAC
79	20nt,	2117	+/100.00%	0		120	#N/A	#N/A	#N/A				1222
80	20nt,	1017	+/100.00%	0		121	#N/A	#N/A	#N/A				CCGCACTAAATCGTGCCAAC
81	20nt,	1495	+/100.00%	0		122	#N/A	#N/A	#N/A				2572
82	20nt,	1068	+/100.00%	0		123	#N/A	#N/A	#N/A				CCGCACAAAATCGTGCCAAC
83	20nt,	24826	+/100.00%	0		124	#N/A	#N/A	#N/A				1323
84	20nt,	2405	+/100.00%	0		125	#N/A	#N/A	#N/A				CCGCACGAATCGTGCCAAC
85	20nt,	9528	+/100.00%	0		126	#N/A	#N/A	#N/A				5765
86	20nt,	1424	+/100.00%	0		127	#N/A	#N/A	#N/A				CCGCACAAAATCGCGCCAAC
87	20nt,	7284	+/100.00%	0		128	#N/A	#N/A	#N/A				22941
88	20nt,	2999	+/100.00%	0		129	#N/A	#N/A	#N/A				CCGCACAAAATCGCCCCACC
89	20nt,	1962	+/100.00%	0		130	#N/A	#N/A	#N/A				1292
90	20nt,	1315	+/100.00%	0		131	#N/A	#N/A	#N/A				CCGCACAAAATTGTGCCACC
91	20nt,	2677	+/100.00%	0		132	#N/A	#N/A	#N/A				1151
92	20nt,	1550	+/100.00%	0		133	#N/A	#N/A	#N/A				CCGCACAAAGTTGTGCCACC
93	20nt,	3013	+/100.00%	0		134	#N/A	#N/A	#N/A				1017
94	20nt,	1324	+/100.00%	0		135	#N/A	#N/A	#N/A				CCGCACAAAATTGTTCCACC
95	20nt,	1576	+/100.00%	0		136	#N/A	#N/A	#N/A				1477
96	20nt,	1190	+/100.00%	0		137	#N/A	#N/A	#N/A				CCGCACAAGATTGTGCCACC
97	20nt,	2125	+/100.00%	0		138	#N/A	#N/A	#N/A				2315
98	20nt,	2606	+/100.00%	0		139	#N/A	#N/A	#N/A				CCGCACAAAATTGTGCCGCC
99	20nt,	1716	+/100.00%	0		140	#N/A	#N/A	#N/A				2461
100	20nt,	1029	+/100.00%	0		141	#N/A	#N/A	#N/A				CCGCACAAATTTGTGCCACC
101	20nt,	10410	+/100.00%	0		142	#N/A	#N/A	#N/A				2792
102	20nt,	1369	+/100.00%	0		143	#N/A	#N/A	#N/A				CCGCACAGAATTGTGCCACC
103	20nt,	10696	+/100.00%	0		144	#N/A	#N/A	#N/A				2819
104	20nt,	1278	+/100.00%	0		145	#N/A	#N/A	#N/A				CCGCACTAAATTGTGCCACC
105	20nt,	4136	+/100.00%	0		146	#N/A	#N/A	#N/A				10185
106	20nt,	1395	+/100.00%	0		147	#N/A	#N/A	#N/A				CCGCACGAAATTGTGCCACC
107	20nt,	1037	+/100.00%	0		148	#N/A	#N/A	#N/A				15245
108	20nt,	1293	+/100.00%	0		149	#N/A	#N/A	#N/A				CCGCACAAATTGTGCCACC
109	20nt,	11135	+/100.00%	0		150	#N/A	#N/A	#N/A				1164
110	20nt,	12257	+/100.00%	0		151	#N/A	#N/A	#N/A				CCGCACAAAATTGCGCCACC
111	20nt,	1524	+/100.00%	0		152	#N/A	#N/A	#N/A				1161
112	20nt,	1833	+/100.00%	0		153	#N/A	#N/A	#N/A				CCGCACAAAATTGCCACC
113	20nt,	1262	+/100.00%	0		154	#N/A	#N/A	#N/A				1896
114	20nt,	7300	+/100.00%	0		155	#N/A	#N/A	#N/A				CCGCACAAAAATTGTGCCACC
115	20nt,	1054	+/100.00%	0		156	#N/A	#N/A	#N/A				1403
116	20nt,	2210	+/100.00%	0		157	#N/A	#N/A	#N/A				CCGCACGAAGTCGTGCCACC
117	20nt,	1187	+/100.00%	0		158	#N/A	#N/A	#N/A				1198
118	20nt,	13575	+/100.00%	0		159	#N/A	#N/A	#N/A				CCGCACGAAATCGTCCCACC
119	20nt,	10613	+/100.00%	0		160	#N/A	#N/A	#N/A				1362
120	20nt,	10518	+/100.00%	0		161	#N/A	#N/A	#N/A				CCGCACGAAATCGTTCCACC
121	20nt,	8345	+/100.00%	0		162	#N/A	#N/A	#N/A				2309
122	20nt,	8076	+/100.00%	0		163	#N/A	#N/A	#N/A				CCGCACAAAAACGCGCCACC
123	20nt,	6101	+/100.00%	0		164	#N/A	#N/A	#N/A				2506
124	20nt,	4034	+/100.00%	0		165	#N/A	#N/A	#N/A				CCGCACGAGATCGTGCCACC
125	20nt,	3300	+/100.00%	0		166	#N/A	#N/A	#N/A				1285
126	20nt,	2921	+/100.00%	0		167	#N/A	#N/A	#N/A				CCGCACAGAATCGTGCCACC
127	20nt,	2551	+/100.00%	0		168	#N/A	#N/A	#N/A				2811
128	20nt,	2503	+/100.00%	0		169	#N/A	#N/A	#N/A				CCGCACGAAATCGTGCCGCC
129	20nt,	2425	+/100.00%	0		170	#N/A	#N/A	#N/A				2443
130	20nt,	2306	+/100.00%	0		171	#N/A	#N/A	#N/A				CCGCACGAAATCTTGCCACC
131	20nt,	2166	+/100.00%	0		172	#N/A	#N/A	#N/A				1581
132	20nt,	2138	+/100.00%	0		173	#N/A	#N/A	#N/A				CCGCACGAAACCGTGCCACC
133	20nt,	1754	+/100.00%	0		174	#N/A	#N/A	#N/A				1429
134	20nt,	1722	+/100.00%	0		175	#N/A	#N/A	#N/A				CCGCACGAAATCGCGCCACC
135	20nt,	1288	+/100.00%	0		176	#N/A	#N/A	#N/A				1293
136	20nt,	1211	+/100.00%	0		177	#N/A	#N/A	#N/A				CCGCACGAAATCGTGCCACT
137	20nt,	1130	+/100.00%	0		178	#N/A	#N/A	#N/A				1968
138	20nt,	1102	+/100.00%	0		179	#N/A	#N/A	#N/A				CCGCACAAAATCGCGCCACC
139	20nt,	1081	+/100.00%	0		180	#N/A	#N/A	#N/A				1992
140	20nt,	1071	+/100.00%	0		181	#N/A	#N/A	#N/A				CCGCACGGAATCGTGCCACC
141	20nt,	1055	+/100.00%	0		182	#N/A	#N/A	#N/A				1086
142	20nt,	4339	+/100.00%	0		183	#N/A	#N/A	#N/A				CCGCACAAATCGTGCCACC
143	20nt,	1583	+/100.00%	0		184	#N/A	#N/A	#N/A				1704
144	20nt,	2282	+/100.00%	0		185	#N/A	#N/A	#N/A				CCGCACAAAGATGTGCCACC
145	20nt,	1698	+/100.00%	0		186	#N/A	#N/A	#N/A				1296
146	20nt,	3217	+/100.00%	0		187	#N/A	#N/A	#N/A				CCGCACAAAATAGTCCCACC
147	20nt,	3007	+/100.00%	0		188	#N/A	#N/A	#N/A				2038
148	20nt,	1249	+/100.00%	0		189	#N/A	#N/A	#N/A				CCGCACAAATGTGCCACC
149	20nt,	1769	+/100.00%	0		190	#N/A	#N/A	#N/A				2101
150	20nt,	5758	+/100.00%	0		191	#N/A	#N/A	#N/A				CCGCACAAAATGTGCCACC
151	20nt,	1323	+/100.00%	0		192	#N/A	#N/A	#N/A				1214
152	20nt,	1775	+/100.00%	0		193	#N/A	#N/A	#N/A				CCGCACAAAAAAGAGCGCCAAC
153	20nt,	1025	+/100.00%	0		194	#N/A	#N/A	#N/A				5130
154	20nt,	10027	+/100.00%	0		195	#N/A	#N/A	#N/A				CCGCACAAAAAAAAGAGCGCCAAC
155	20nt,	2699	+/100.00%	0		196	#N/A	#N/A	#N/A				1627
156	20nt,	1278	+/100.00%	0		197	#N/A	#N/A	#N/A				CCGCACAAAAAAAAAAGAGCGCCAAC
157	20nt,	2997	+/100.00%	0		198	#N/A	#N/A	#N/A				1464
158	20nt,	1560	+/100.00%	0		199	#N/A	#N/A	#N/A				CCGCACGAAACGGCGCCAAC
159	20nt,	1357	+/100.00%	0		200	#N/A	#N/A	#N/A				2777
160	20nt,	1571	+/100.00%	0									CCGCACAGAAGCGCGCCAAC
161	20nt,	2141	+/100.00%	0									1232
162	20nt,	2084	+/100.00%	0									CCGCACAAAGTCGCGCCAAC
163	20nt,	2755	+/100.00%	0									1986
164	20nt,	2941	+/100.00%	0									CCGCACAGAATCGCGCCAAC
165	20nt,	1446	+/100.00%	0									2483
166	20nt,	2057	+/100.00%	0									CCGCACAGAGCGCGCCAAC
167	20nt,	1594	+/100.00%	0									1238
168	20nt,	2251	+/100.00%	0									CCGCACAAATTAGCGCCATC
169	20nt,	1242	+/100.00%	0									end
170	20nt,	1087	+/100.00%	0
171	20nt,	3174	+/100.00%	0
172	20nt,	2844	+/100.00%	0
173	20nt,	6560	+/100.00%	0
174	20nt,	1298	+/100.00%	0
175	20nt,	6665	+/100.00%	0
176	20nt,	2237	+/100.00%	0
177	20nt,	8518	+/100.00%	0
178	20nt,	1102	+/100.00%	0
179	20nt,	4954	+/100.00%	0
180	20nt,	5186	+/100.00%	0
181	20nt,	20298	+/100.00%	0
182	20nt,	1613	+/100.00%	0
183	20nt,	1438	+/100.00%	0
184	20nt,	1508	+/100.00%	0
185	20nt,	1454	+/100.00%	0
186	20nt,	1237	+/100.00%	0
187	20nt,	3098	+/100.00%	0
188	20nt,	3335	+/100.00%	0
189	20nt,	2418	+/100.00%	0
190	20nt,	3912	+/100.00%	0
191	20nt,	6853	+/100.00%	0
192	20nt,	1524	+/100.00%	0
193	20nt,	2776	+/100.00%	0
194	20nt,	1355	+/100.00%	0
195	20nt,	3257	+/100.00%	0
196	20nt,	1622	+/100.00%	0
197	20nt,	2119	+/100.00%	0
198	20nt,	6800	+/100.00%	0
199	20nt,	1869	+/100.00%	0
200	20nt,	3795	+/100.00%	0
201	20nt,	2513	+/100.00%	0
202	20nt,	4450	+/100.00%	0
203	20nt,	2268	+/100.00%	0
204	20nt,	2208	+/100.00%	0
205	20nt,	1915	+/100.00%	0
206	20nt,	2561	+/100.00%	0
207	20nt,	1754	+/100.00%	0
208	20nt,	2503	+/100.00%	0
209	20nt,	9456	+/100.00%	0
210	20nt,	5537	+/100.00%	0
211	20nt,	8890	+/100.00%	0
212	20nt,	5461	+/100.00%	0
213	20nt,	2064	+/100.00%	0
214	20nt,	1560	+/100.00%	0
215	20nt,	1165	+/100.00%	0
216	20nt,	4798	+/100.00%	0
217	20nt,	1869	+/100.00%	0
218	20nt,	1756	+/100.00%	0
219	20nt,	2527	+/100.00%	0
220	20nt,	1450	+/100.00%	0
221	20nt,	3549	+/100.00%	0
222	20nt,	3341	+/100.00%	0
223	20nt,	1075	+/100.00%	0
224	20nt,	1638	+/100.00%	0
225	20nt,	1433	+/100.00%	0
226	20nt,	4959	+/100.00%	0
227	20nt,	4478	+/100.00%	0
228	20nt,	3887	+/100.00%	0
229	20nt,	3754	+/100.00%	0
230	20nt,	3264	+/100.00%	0
231	20nt,	3059	+/100.00%	0
232	20nt,	2755	+/100.00%	0
233	20nt,	2472	+/100.00%	0
234	20nt,	2369	+/100.00%	0
235	20nt,	1842	+/100.00%	0
236	20nt,	1622	+/100.00%	0
237	20nt,	1555	+/100.00%	0
238	20nt,	1462	+/100.00%	0
239	20nt,	1358	+/100.00%	0
240	20nt,	1270	+/100.00%	0
241	20nt,	1237	+/100.00%	0
242	20nt,	1232	+/100.00%	0
243	20nt,	1182	+/100.00%	0
244	20nt,	1164	+/100.00%	0
245	20nt,	1105	+/100.00%	0
246	20nt,	1103	+/100.00%	0
247	20nt,	1075	+/100.00%	0
248	20nt,	1060	+/100.00%	0
249	20nt,	1008	+/100.00%	0
250	20nt,	3901	+/100.00%	0
251	20nt,	1446	+/100.00%	0
252	20nt,	2884	+/100.00%	0
253	20nt,	4739	+/100.00%	0
254	20nt,	2738	+/100.00%	0
255	20nt,	6676	+/100.00%	0
256	20nt,	1697	+/100.00%	0
257	20nt,	40063	+/100.00%	0
258	20nt,	2821	+/100.00%	0
259	20nt,	4422	+/100.00%	0
260	20nt,	1430	+/100.00%	0
Cluster 11				14901	0.110655
0	20nt,	3434		0
1	20nt,	1054	+/100.00%	0
2	20nt,	5456	+/100.00%	0
3	20nt,	1512	+/100.00%	0
4	20nt,	1938	+/100.00%	0
5	20nt,	1507	+/100.00%	0
Cluster 12				8203	0.0609157
0	20nt,	2330		0
1	20nt,	1154	+/100.00%	0
2	20nt,	4719	+/100.00%	0
Cluster 13				1502	0.0111539
0	20nt,	1502		0
Cluster 14				971950	7.21773
0	20nt,	1167		0
1	20nt,	13312	+/100.00%	0
2	20nt,	2240	+/100.00%	0
3	20nt,	1546	+/100.00%	0
4	20nt,	1717	+/100.00%	0
5	20nt,	1141	+/100.00%	0
6	20nt,	1098	+/100.00%	0
7	20nt,	1003	+/100.00%	0
8	20nt,	1532	+/100.00%	0
9	20nt,	1014	+/100.00%	0
10	20nt,	1791	+/100.00%	0
11	20nt,	1047	+/100.00%	0
12	20nt,	1226	+/100.00%	0
13	20nt,	1032	+/100.00%	0
14	20nt,	1517	+/100.00%	0
15	20nt,	1789	+/100.00%	0
16	20nt,	1631	+/100.00%	0
17	20nt,	1532	+/100.00%	0
18	20nt,	1071	+/100.00%	0
19	20nt,	1124	+/100.00%	0
20	20nt,	1056	+/100.00%	0
21	20nt,	1790	+/100.00%	0
22	20nt,	1677	+/100.00%	0
23	20nt,	1836	+/100.00%	0
24	20nt,	1686	+/100.00%	0
25	20nt,	1594	+/100.00%	0
26	20nt,	1304	+/100.00%	0
27	20nt,	1290	+/100.00%	0
28	20nt,	1232	+/100.00%	0
29	20nt,	1196	+/100.00%	0
30	20nt,	1190	+/100.00%	0
31	20nt,	3609	+/100.00%	0
32	20nt,	2356	+/100.00%	0
33	20nt,	1914	+/100.00%	0
34	20nt,	1300	+/100.00%	0
35	20nt,	1414	+/100.00%	0
36	20nt,	1257	+/100.00%	0
37	20nt,	15033	+/100.00%	0
38	20nt,	8515	+/100.00%	0
39	20nt,	3088	+/100.00%	0
40	20nt,	1231	+/100.00%	0
41	20nt,	1819	+/100.00%	0
42	20nt,	1439	+/100.00%	0
43	20nt,	1301	+/100.00%	0
44	20nt,	2596	+/100.00%	0
45	20nt,	2517	+/100.00%	0
46	20nt,	1046	+/100.00%	0
47	20nt,	1092	+/100.00%	0
48	20nt,	1111	+/100.00%	0
49	20nt,	2745	+/100.00%	0
50	20nt,	9603	+/100.00%	0
51	20nt,	13259	+/100.00%	0
52	20nt,	27174	+/100.00%	0
53	20nt,	69733	+/100.00%	0
54	20nt,	143303	+/100.00%	0
55	20nt,	157125	+/100.00%	0
56	20nt,	1313	+/100.00%	0
57	20nt,	1258	+/100.00%	0
58	20nt,	1230	+/100.00%	0
59	20nt,	1172	+/100.00%	0
60	20nt,	1035	+/100.00%	0
61	20nt,	1028	+/100.00%	0
62	20nt,	1013	+/100.00%	0
63	20nt,	1186	+/100.00%	0
64	20nt,	2849	+/100.00%	0
65	20nt,	2262	+/100.00%	0
66	20nt,	1142	+/100.00%	0
67	20nt,	11959	+/100.00%	0
68	20nt,	8619	+/100.00%	0
69	20nt,	3756	+/100.00%	0
70	20nt,	1363	+/100.00%	0
71	20nt,	46306	+/100.00%	0
72	20nt,	28460	+/100.00%	0
73	20nt,	11402	+/100.00%	0
74	20nt,	3801	+/100.00%	0
75	20nt,	3570	+/100.00%	0
76	20nt,	1091	+/100.00%	0
77	20nt,	112548	+/100.00%	0
78	20nt,	67820	+/100.00%	0
79	20nt,	24877	+/100.00%	0
80	20nt,	8926	+/100.00%	0
81	20nt,	7876	+/100.00%	0
82	20nt,	2395	+/100.00%	0
83	20nt,	2536	+/100.00%	0
84	20nt,	1477	+/100.00%	0
85	20nt,	1707	+/100.00%	0
86	20nt,	1002	+/100.00%	0
87	20nt,	16579	+/100.00%	0
88	20nt,	14567	+/100.00%	0
89	20nt,	12375	+/100.00%	0
90	20nt,	7878	+/100.00%	0
91	20nt,	4773	+/100.00%	0
92	20nt,	4639	+/100.00%	0
93	20nt,	3567	+/100.00%	0
94	20nt,	2115	+/100.00%	0
95	20nt,	1134	+/100.00%	0
96	20nt,	6383	+/100.00%	0
Cluster 15				2533	0.0188101
0	20nt,	1457		0
1	20nt,	1076	+/100.00%	0
Cluster 16				279471	2.07536
0	20nt,	1188		0
1	20nt,	1089	+/100.00%	0
2	20nt,	1949	+/100.00%	0
3	20nt,	1390	+/100.00%	0
4	20nt,	1175	+/100.00%	0
5	20nt,	2040	+/100.00%	0
6	20nt,	3709	+/100.00%	0
7	20nt,	5141	+/100.00%	0
8	20nt,	12572	+/100.00%	0
9	20nt,	24081	+/100.00%	0
10	20nt,	24590	+/100.00%	0
11	20nt,	49505	+/100.00%	0
12	20nt,	64043	+/100.00%	0
13	20nt,	82163	+/100.00%	0
14	20nt,	3052	+/100.00%	0
15	20nt,	1784	+/100.00%	0
Cluster 17				1124	0.00834686
0	20nt,	1124		0
Cluster 18				4102	0.0304616
0	20nt,	1759		0
1	20nt,	1277	+/100.00%	0
2	20nt,	1066	+/100.00%	0
Cluster 19				6587	0.0489153
0	20nt,	2702		0
1	20nt,	2149	+/100.00%	0
2	20nt,	1736	+/100.00%	0
Cluster 20				4753	0.0352959
0	20nt,	1999		0
1	20nt,	1510	+/100.00%	0
2	20nt,	1244	+/100.00%	0
Cluster 21				3781	0.0280778
0	20nt,	3781		0
Cluster 22				8687	0.0645099
0	20nt,	1222		0
1	20nt,	2432	+/100.00%	0
2	20nt,	1954	+/100.00%	0
3	20nt,	1074	+/100.00%	0
4	20nt,	2005	+/100.00%	0
Cluster 23				31057	0.23063
0	20nt,	14801		0
1	20nt,	2050	+/100.00%	0
2	20nt,	11253	+/100.00%	0
3	20nt,	1478	+/100.00%	0
4	20nt,	1475	+/100.00%	0
Cluster 24				2627	0.0195082
0	20nt,	1365		0
1	20nt,	1262	+/100.00%	0
Cluster 25				90898	0.675011
0	20nt,	2949		0
1	20nt,	1123	+/100.00%	0
2	20nt,	5960	+/100.00%	0
3	20nt,	5055	+/100.00%	0
4	20nt,	4808	+/100.00%	0
5	20nt,	2250	+/100.00%	0
6	20nt,	2162	+/100.00%	0
7	20nt,	1129	+/100.00%	0
8	20nt,	1248	+/100.00%	0
9	20nt,	1354	+/100.00%	0
10	20nt,	38397	+/100.00%	0
11	20nt,	8766	+/100.00%	0
12	20nt,	5167	+/100.00%	0
13	20nt,	1774	+/100.00%	0
14	20nt,	3564	+/100.00%	0
15	20nt,	2609	+/100.00%	0
16	20nt,	1029	+/100.00%	0
17	20nt,	1554	+/100.00%	0
Cluster 26				21398	0.158902
0	20nt,	3376		0
1	20nt,	1364	+/100.00%	0
2	20nt,	1350	+/100.00%	0
3	20nt,	2430	+/100.00%	0
4	20nt,	2032	+/100.00%	0
5	20nt,	2180	+/100.00%	0
6	20nt,	1222	+/100.00%	0
7	20nt,	1090	+/100.00%	0
8	20nt,	1815	+/100.00%	0
9	20nt,	2923	+/100.00%	0
10	20nt,	1616	+/100.00%	0
Cluster 27				20087	0.149167
0	20nt,	3704		0
1	20nt,	2497	+/100.00%	0
2	20nt,	2390	+/100.00%	0
3	20nt,	2911	+/100.00%	0
4	20nt,	1264	+/100.00%	0
5	20nt,	1107	+/100.00%	0
6	20nt,	1235	+/100.00%	0
7	20nt,	2285	+/100.00%	0
8	20nt,	2694	+/100.00%	0
Cluster 28				38594	0.2866
0	20nt,	1287		0
1	20nt,	1133	+/100.00%	0
2	20nt,	1233	+/100.00%	0
3	20nt,	1022	+/100.00%	0
4	20nt,	1095	+/100.00%	0
5	20nt,	7052	+/100.00%	0
6	20nt,	6253	+/100.00%	0
7	20nt,	5875	+/100.00%	0
8	20nt,	4560	+/100.00%	0
9	20nt,	4076	+/100.00%	0
10	20nt,	2609	+/100.00%	0
11	20nt,	1112	+/100.00%	0
12	20nt,	1287	+/100.00%	0
Cluster 29				6089678	45.2221
0	20nt,	10030		0
1	20nt,	1012	+/100.00%	0
2	20nt,	1551	+/100.00%	0
3	20nt,	1478	+/100.00%	0
4	20nt,	1659	+/100.00%	0
5	20nt,	13539	+/100.00%	0
6	20nt,	3113	+/100.00%	0
7	20nt,	2555	+/100.00%	0
8	20nt,	1191	+/100.00%	0
9	20nt,	1025	+/100.00%	0
10	20nt,	1548	+/100.00%	0
11	20nt,	1507	+/100.00%	0
12	20nt,	1545	+/100.00%	0
13	20nt,	1301	+/100.00%	0
14	20nt,	1388	+/100.00%	0
15	20nt,	1168	+/100.00%	0
16	20nt,	1198	+/100.00%	0
17	20nt,	1133	+/100.00%	0
18	20nt,	1249	+/100.00%	0
19	20nt,	1200	+/100.00%	0
20	20nt,	1688	+/100.00%	0
21	20nt,	2912	+/100.00%	0
22	20nt,	1066	+/100.00%	0
23	20nt,	2832	+/100.00%	0
24	20nt,	2793	+/100.00%	0
25	20nt,	2477	+/100.00%	0
26	20nt,	1423	+/100.00%	0
27	20nt,	2009	+/100.00%	0
28	20nt,	1715	+/100.00%	0
29	20nt,	1280	+/100.00%	0
30	20nt,	1089	+/100.00%	0
31	20nt,	19977	+/100.00%	0
32	20nt,	17628	+/100.00%	0
33	20nt,	9716	+/100.00%	0
34	20nt,	4881	+/100.00%	0
35	20nt,	4336	+/100.00%	0
36	20nt,	1454	+/100.00%	0
37	20nt,	3764	+/100.00%	0
38	20nt,	3006	+/100.00%	0
39	20nt,	2563	+/100.00%	0
40	20nt,	1887	+/100.00%	0
41	20nt,	1015	+/100.00%	0
42	20nt,	9245	+/100.00%	0
43	20nt,	7478	+/100.00%	0
44	20nt,	6118	+/100.00%	0
45	20nt,	4844	+/100.00%	0
46	20nt,	2690	+/100.00%	0
47	20nt,	1589	+/100.00%	0
48	20nt,	1169	+/100.00%	0
49	20nt,	1117	+/100.00%	0
50	20nt,	39780	+/100.00%	0
51	20nt,	37965	+/100.00%	0
52	20nt,	21165	+/100.00%	0
53	20nt,	9213	+/100.00%	0
54	20nt,	8035	+/100.00%	0
55	20nt,	3232	+/100.00%	0
56	20nt,	1438	+/100.00%	0
57	20nt,	1148	+/100.00%	0
58	20nt,	5072	+/100.00%	0
59	20nt,	3814	+/100.00%	0
60	20nt,	1822	+/100.00%	0
61	20nt,	1207	+/100.00%	0
62	20nt,	3044	+/100.00%	0
63	20nt,	2420	+/100.00%	0
64	20nt,	1269	+/100.00%	0
65	20nt,	1110	+/100.00%	0
66	20nt,	3414	+/100.00%	0
67	20nt,	3363	+/100.00%	0
68	20nt,	1746	+/100.00%	0
69	20nt,	1756	+/100.00%	0
70	20nt,	1467	+/100.00%	0
71	20nt,	1110	+/100.00%	0
72	20nt,	1111	+/100.00%	0
73	20nt,	1051	+/100.00%	0
74	20nt,	1004	+/100.00%	0
75	20nt,	1220	+/100.00%	0
76	20nt,	1145	+/100.00%	0
77	20nt,	1090	+/100.00%	0
78	20nt,	1066	+/100.00%	0
79	20nt,	1195	+/100.00%	0
80	20nt,	1092	+/100.00%	0
81	20nt,	1521	+/100.00%	0
82	20nt,	1026	+/100.00%	0
83	20nt,	1949	+/100.00%	0
84	20nt,	1186	+/100.00%	0
85	20nt,	11662	+/100.00%	0
86	20nt,	10524	+/100.00%	0
87	20nt,	5685	+/100.00%	0
88	20nt,	2675	+/100.00%	0
89	20nt,	2446	+/100.00%	0
90	20nt,	1299	+/100.00%	0
91	20nt,	2169	+/100.00%	0
92	20nt,	1930	+/100.00%	0
93	20nt,	1189	+/100.00%	0
94	20nt,	1044	+/100.00%	0
95	20nt,	1476	+/100.00%	0
96	20nt,	1407	+/100.00%	0
97	20nt,	1176	+/100.00%	0
98	20nt,	1530	+/100.00%	0
99	20nt,	1422	+/100.00%	0
100	20nt,	1159	+/100.00%	0
101	20nt,	1653	+/100.00%	0
102	20nt,	1344	+/100.00%	0
103	20nt,	1176	+/100.00%	0
104	20nt,	1493	+/100.00%	0
105	20nt,	1164	+/100.00%	0
106	20nt,	1120	+/100.00%	0
107	20nt,	1096	+/100.00%	0
108	20nt,	1009	+/100.00%	0
109	20nt,	2337	+/100.00%	0
110	20nt,	2190	+/100.00%	0
111	20nt,	1278	+/100.00%	0
112	20nt,	1391	+/100.00%	0
113	20nt,	1078	+/100.00%	0
114	20nt,	2369	+/100.00%	0
115	20nt,	1699	+/100.00%	0
116	20nt,	1653	+/100.00%	0
117	20nt,	1340	+/100.00%	0
118	20nt,	1682	+/100.00%	0
119	20nt,	1175	+/100.00%	0
120	20nt,	9999	+/100.00%	0
121	20nt,	8568	+/100.00%	0
122	20nt,	1983	+/100.00%	0
123	20nt,	6023	+/100.00%	0
124	20nt,	2319	+/100.00%	0
125	20nt,	1849	+/100.00%	0
126	20nt,	1235	+/100.00%	0
127	20nt,	3133	+/100.00%	0
128	20nt,	2515	+/100.00%	0
129	20nt,	2165	+/100.00%	0
130	20nt,	1705	+/100.00%	0
131	20nt,	1743	+/100.00%	0
132	20nt,	1431	+/100.00%	0
133	20nt,	1378	+/100.00%	0
134	20nt,	1781	+/100.00%	0
135	20nt,	1249	+/100.00%	0
136	20nt,	1777	+/100.00%	0
137	20nt,	1483	+/100.00%	0
138	20nt,	1125	+/100.00%	0
139	20nt,	1034	+/100.00%	0
140	20nt,	11768	+/100.00%	0
141	20nt,	1974	+/100.00%	0
142	20nt,	1500	+/100.00%	0
143	20nt,	1026	+/100.00%	0
144	20nt,	1792	+/100.00%	0
145	20nt,	1777	+/100.00%	0
146	20nt,	1627	+/100.00%	0
147	20nt,	1128	+/100.00%	0
148	20nt,	1116	+/100.00%	0
149	20nt,	1094	+/100.00%	0
150	20nt,	12437	+/100.00%	0
151	20nt,	9459	+/100.00%	0
152	20nt,	8815	+/100.00%	0
153	20nt,	5782	+/100.00%	0
154	20nt,	2984	+/100.00%	0
155	20nt,	1760	+/100.00%	0
156	20nt,	1664	+/100.00%	0
157	20nt,	4014	+/100.00%	0
158	20nt,	3152	+/100.00%	0
159	20nt,	2950	+/100.00%	0
160	20nt,	1720	+/100.00%	0
161	20nt,	1010	+/100.00%	0
162	20nt,	9882	+/100.00%	0
163	20nt,	7838	+/100.00%	0
164	20nt,	6322	+/100.00%	0
165	20nt,	5084	+/100.00%	0
166	20nt,	2901	+/100.00%	0
167	20nt,	1670	+/100.00%	0
168	20nt,	1130	+/100.00%	0
169	20nt,	11047	+/100.00%	0
170	20nt,	9201	+/100.00%	0
171	20nt,	6908	+/100.00%	0
172	20nt,	5987	+/100.00%	0
173	20nt,	3170	+/100.00%	0
174	20nt,	2017	+/100.00%	0
175	20nt,	1229	+/100.00%	0
176	20nt,	1395	+/100.00%	0
177	20nt,	9162	+/100.00%	0
178	20nt,	7859	+/100.00%	0
179	20nt,	6459	+/100.00%	0
180	20nt,	5131	+/100.00%	0
181	20nt,	2990	+/100.00%	0
182	20nt,	1731	+/100.00%	0
183	20nt,	1149	+/100.00%	0
184	20nt,	16812	+/100.00%	0
185	20nt,	13245	+/100.00%	0
186	20nt,	12303	+/100.00%	0
187	20nt,	8165	+/100.00%	0
188	20nt,	4434	+/100.00%	0
189	20nt,	2416	+/100.00%	0
190	20nt,	2228	+/100.00%	0
191	20nt,	1123	+/100.00%	0
192	20nt,	3984	+/100.00%	0
193	20nt,	3338	+/100.00%	0
194	20nt,	2502	+/100.00%	0
195	20nt,	2238	+/100.00%	0
196	20nt,	1341	+/100.00%	0
197	20nt,	6096	+/100.00%	0
198	20nt,	5172	+/100.00%	0
199	20nt,	3909	+/100.00%	0
200	20nt,	3322	+/100.00%	0
201	20nt,	1914	+/100.00%	0
202	20nt,	1088	+/100.00%	0
203	20nt,	12839	+/100.00%	0
204	20nt,	10446	+/100.00%	0
205	20nt,	8748	+/100.00%	0
206	20nt,	6699	+/100.00%	0
207	20nt,	3614	+/100.00%	0
208	20nt,	2262	+/100.00%	0
209	20nt,	1558	+/100.00%	0
210	20nt,	1074	+/100.00%	0
211	20nt,	1447	+/100.00%	0
212	20nt,	2018	+/100.00%	0
213	20nt,	5584	+/100.00%	0
214	20nt,	10788	+/100.00%	0
215	20nt,	12807	+/100.00%	0
216	20nt,	21263	+/100.00%	0
217	20nt,	41095	+/100.00%	0
218	20nt,	58097	+/100.00%	0
219	20nt,	66671	+/100.00%	0
220	20nt,	84205	+/100.00%	0
221	20nt,	2096	+/100.00%	0
222	20nt,	1579	+/100.00%	0
223	20nt,	1553	+/100.00%	0
224	20nt,	1137	+/100.00%	0
225	20nt,	3064	+/100.00%	0
226	20nt,	6975	+/100.00%	0
227	20nt,	6982	+/100.00%	0
228	20nt,	12574	+/100.00%	0
229	20nt,	24532	+/100.00%	0
230	20nt,	37092	+/100.00%	0
231	20nt,	40627	+/100.00%	0
232	20nt,	52601	+/100.00%	0
233	20nt,	1334	+/100.00%	0
234	20nt,	1028	+/100.00%	0
235	20nt,	1668	+/100.00%	0
236	20nt,	1049	+/100.00%	0
237	20nt,	1099	+/100.00%	0
238	20nt,	1136	+/100.00%	0
239	20nt,	8726	+/100.00%	0
240	20nt,	1683	+/100.00%	0
241	20nt,	2990	+/100.00%	0
242	20nt,	1408	+/100.00%	0
243	20nt,	2005	+/100.00%	0
244	20nt,	1480	+/100.00%	0
245	20nt,	13460	+/100.00%	0
246	20nt,	10226	+/100.00%	0
247	20nt,	9995	+/100.00%	0
248	20nt,	6493	+/100.00%	0
249	20nt,	4636	+/100.00%	0
250	20nt,	3239	+/100.00%	0
251	20nt,	2468	+/100.00%	0
252	20nt,	1005	+/100.00%	0
253	20nt,	1036	+/100.00%	0
254	20nt,	1039	+/100.00%	0
255	20nt,	1066	+/100.00%	0
256	20nt,	1086	+/100.00%	0
257	20nt,	1093	+/100.00%	0
258	20nt,	1095	+/100.00%	0
259	20nt,	1095	+/100.00%	0
260	20nt,	1155	+/100.00%	0
261	20nt,	1208	+/100.00%	0
262	20nt,	1225	+/100.00%	0
263	20nt,	1273	+/100.00%	0
264	20nt,	1299	+/100.00%	0
265	20nt,	1331	+/100.00%	0
266	20nt,	1333	+/100.00%	0
267	20nt,	1344	+/100.00%	0
268	20nt,	1437	+/100.00%	0
269	20nt,	1480	+/100.00%	0
270	20nt,	1580	+/100.00%	0
271	20nt,	1606	+/100.00%	0
272	20nt,	1631	+/100.00%	0
273	20nt,	1787	+/100.00%	0
274	20nt,	1895	+/100.00%	0
275	20nt,	1955	+/100.00%	0
276	20nt,	2265	+/100.00%	0
277	20nt,	2406	+/100.00%	0
278	20nt,	268338	+/100.00%	0
279	20nt,	224263	+/100.00%	0
280	20nt,	172795	+/100.00%	0
281	20nt,	148361	+/100.00%	0
282	20nt,	85091	+/100.00%	0
283	20nt,	53121	+/100.00%	0
284	20nt,	30694	+/100.00%	0
285	20nt,	24330	+/100.00%	0
286	20nt,	9268	+/100.00%	0
287	20nt,	4487	+/100.00%	0
288	20nt,	3099	+/100.00%	0
289	20nt,	1067	+/100.00%	0
290	20nt,	1198	+/100.00%	0
291	20nt,	1049	+/100.00%	0
292	20nt,	1125	+/100.00%	0
293	20nt,	1090	+/100.00%	0
294	20nt,	2428	+/100.00%	0
295	20nt,	1439	+/100.00%	0
296	20nt,	1397	+/100.00%	0
297	20nt,	2963	+/100.00%	0
298	20nt,	2529	+/100.00%	0
299	20nt,	2001	+/100.00%	0
300	20nt,	1170	+/100.00%	0
301	20nt,	1845	+/100.00%	0
302	20nt,	1769	+/100.00%	0
303	20nt,	1387	+/100.00%	0
304	20nt,	1110	+/100.00%	0
305	20nt,	2165	+/100.00%	0
306	20nt,	4185	+/100.00%	0
307	20nt,	2433	+/100.00%	0
308	20nt,	1969	+/100.00%	0
309	20nt,	2699	+/100.00%	0
310	20nt,	2138	+/100.00%	0
311	20nt,	2021	+/100.00%	0
312	20nt,	1204	+/100.00%	0
313	20nt,	2063	+/100.00%	0
314	20nt,	1698	+/100.00%	0
315	20nt,	1360	+/100.00%	0
316	20nt,	1214	+/100.00%	0
317	20nt,	1281	+/100.00%	0
318	20nt,	1122	+/100.00%	0
319	20nt,	1100	+/100.00%	0
320	20nt,	1026	+/100.00%	0
321	20nt,	5080	+/100.00%	0
322	20nt,	3857	+/100.00%	0
323	20nt,	2746	+/100.00%	0
324	20nt,	1996	+/100.00%	0
325	20nt,	3382	+/100.00%	0
326	20nt,	3112	+/100.00%	0
327	20nt,	1772	+/100.00%	0
328	20nt,	1066	+/100.00%	0
329	20nt,	1004	+/100.00%	0
330	20nt,	1102	+/100.00%	0
331	20nt,	1080	+/100.00%	0
332	20nt,	1067	+/100.00%	0
333	20nt,	1055	+/100.00%	0
334	20nt,	1041	+/100.00%	0
335	20nt,	1036	+/100.00%	0
336	20nt,	1096	+/100.00%	0
337	20nt,	1096	+/100.00%	0
338	20nt,	2155	+/100.00%	0
339	20nt,	1771	+/100.00%	0
340	20nt,	2242	+/100.00%	0
341	20nt,	1906	+/100.00%	0
342	20nt,	1371	+/100.00%	0
343	20nt,	1343	+/100.00%	0
344	20nt,	1213	+/100.00%	0
345	20nt,	1209	+/100.00%	0
346	20nt,	1374	+/100.00%	0
347	20nt,	1211	+/100.00%	0
348	20nt,	1694	+/100.00%	0
349	20nt,	1300	+/100.00%	0
350	20nt,	1302	+/100.00%	0
351	20nt,	1233	+/100.00%	0
352	20nt,	1383	+/100.00%	0
353	20nt,	1276	+/100.00%	0
354	20nt,	2979	+/100.00%	0
355	20nt,	1050	+/100.00%	0
356	20nt,	5589	+/100.00%	0
357	20nt,	3005	+/100.00%	0
358	20nt,	2009	+/100.00%	0
359	20nt,	1766	+/100.00%	0
360	20nt,	1780	+/100.00%	0
361	20nt,	1581	+/100.00%	0
362	20nt,	1607	+/100.00%	0
363	20nt,	1558	+/100.00%	0
364	20nt,	1331	+/100.00%	0
365	20nt,	1243	+/100.00%	0
366	20nt,	1163	+/100.00%	0
367	20nt,	1025	+/100.00%	0
368	20nt,	1132	+/100.00%	0
369	20nt,	1117	+/100.00%	0
370	20nt,	1111	+/100.00%	0
371	20nt,	1108	+/100.00%	0
372	20nt,	1062	+/100.00%	0
373	20nt,	1054	+/100.00%	0
374	20nt,	1047	+/100.00%	0
375	20nt,	1064	+/100.00%	0
376	20nt,	2103	+/100.00%	0
377	20nt,	1464	+/100.00%	0
378	20nt,	1532	+/100.00%	0
379	20nt,	6162	+/100.00%	0
380	20nt,	5471	+/100.00%	0
381	20nt,	3106	+/100.00%	0
382	20nt,	1571	+/100.00%	0
383	20nt,	1332	+/100.00%	0
384	20nt,	10830	+/100.00%	0
385	20nt,	8434	+/100.00%	0
386	20nt,	7910	+/100.00%	0
387	20nt,	4327	+/100.00%	0
388	20nt,	2137	+/100.00%	0
389	20nt,	1665	+/100.00%	0
390	20nt,	1167	+/100.00%	0
391	20nt,	6544	+/100.00%	0
392	20nt,	5702	+/100.00%	0
393	20nt,	4015	+/100.00%	0
394	20nt,	3811	+/100.00%	0
395	20nt,	2421	+/100.00%	0
396	20nt,	1667	+/100.00%	0
397	20nt,	4298	+/100.00%	0
398	20nt,	3331	+/100.00%	0
399	20nt,	3013	+/100.00%	0
400	20nt,	2079	+/100.00%	0
401	20nt,	1038	+/100.00%	0
402	20nt,	1018	+/100.00%	0
403	20nt,	1471	+/100.00%	0
404	20nt,	1494	+/100.00%	0
405	20nt,	2146	+/100.00%	0
406	20nt,	2573	+/100.00%	0
407	20nt,	1146	+/100.00%	0
408	20nt,	1426	+/100.00%	0
409	20nt,	3244	+/100.00%	0
410	20nt,	1190	+/100.00%	0
411	20nt,	1111	+/100.00%	0
412	20nt,	12143	+/100.00%	0
413	20nt,	1666	+/100.00%	0
414	20nt,	1254	+/100.00%	0
415	20nt,	3382	+/100.00%	0
416	20nt,	3219	+/100.00%	0
417	20nt,	1765	+/100.00%	0
418	20nt,	2237	+/100.00%	0
419	20nt,	1974	+/100.00%	0
420	20nt,	1034	+/100.00%	0
421	20nt,	2383	+/100.00%	0
422	20nt,	2342	+/100.00%	0
423	20nt,	1351	+/100.00%	0
424	20nt,	2412	+/100.00%	0
425	20nt,	2248	+/100.00%	0
426	20nt,	1266	+/100.00%	0
427	20nt,	17098	+/100.00%	0
428	20nt,	3134	+/100.00%	0
429	20nt,	2487	+/100.00%	0
430	20nt,	1942	+/100.00%	0
431	20nt,	1777	+/100.00%	0
432	20nt,	1154	+/100.00%	0
433	20nt,	2340	+/100.00%	0
434	20nt,	2166	+/100.00%	0
435	20nt,	1037	+/100.00%	0
436	20nt,	2101	+/100.00%	0
437	20nt,	1952	+/100.00%	0
438	20nt,	1036	+/100.00%	0
439	20nt,	1877	+/100.00%	0
440	20nt,	1785	+/100.00%	0
441	20nt,	1020	+/100.00%	0
442	20nt,	1867	+/100.00%	0
443	20nt,	1215	+/100.00%	0
444	20nt,	6934	+/100.00%	0
445	20nt,	6313	+/100.00%	0
446	20nt,	3185	+/100.00%	0
447	20nt,	1293	+/100.00%	0
448	20nt,	1120	+/100.00%	0
449	20nt,	13754	+/100.00%	0
450	20nt,	13263	+/100.00%	0
451	20nt,	7104	+/100.00%	0
452	20nt,	3173	+/100.00%	0
453	20nt,	2665	+/100.00%	0
454	20nt,	1051	+/100.00%	0
455	20nt,	3594	+/100.00%	0
456	20nt,	3204	+/100.00%	0
457	20nt,	1766	+/100.00%	0
458	20nt,	11395	+/100.00%	0
459	20nt,	11377	+/100.00%	0
460	20nt,	6353	+/100.00%	0
461	20nt,	2829	+/100.00%	0
462	20nt,	2189	+/100.00%	0
463	20nt,	6521	+/100.00%	0
464	20nt,	6193	+/100.00%	0
465	20nt,	3392	+/100.00%	0
466	20nt,	1377	+/100.00%	0
467	20nt,	1215	+/100.00%	0
468	20nt,	2614	+/100.00%	0
469	20nt,	2119	+/100.00%	0
470	20nt,	1481	+/100.00%	0
471	20nt,	1285	+/100.00%	0
472	20nt,	5697	+/100.00%	0
473	20nt,	3646	+/100.00%	0
474	20nt,	2101	+/100.00%	0
475	20nt,	1709	+/100.00%	0
476	20nt,	2875	+/100.00%	0
477	20nt,	2741	+/100.00%	0
478	20nt,	2091	+/100.00%	0
479	20nt,	1196	+/100.00%	0
480	20nt,	17480	+/100.00%	0
481	20nt,	15536	+/100.00%	0
482	20nt,	8466	+/100.00%	0
483	20nt,	4101	+/100.00%	0
484	20nt,	3740	+/100.00%	0
485	20nt,	1236	+/100.00%	0
486	20nt,	4674	+/100.00%	0
487	20nt,	4540	+/100.00%	0
488	20nt,	2706	+/100.00%	0
489	20nt,	1212	+/100.00%	0
490	20nt,	13426	+/100.00%	0
491	20nt,	12927	+/100.00%	0
492	20nt,	7259	+/100.00%	0
493	20nt,	3041	+/100.00%	0
494	20nt,	2752	+/100.00%	0
495	20nt,	1108	+/100.00%	0
496	20nt,	1522	+/100.00%	0
497	20nt,	2353	+/100.00%	0
498	20nt,	5295	+/100.00%	0
499	20nt,	14108	+/100.00%	0
500	20nt,	15432	+/100.00%	0
501	20nt,	34506	+/100.00%	0
502	20nt,	60689	+/100.00%	0
503	20nt,	64262	+/100.00%	0
504	20nt,	3753	+/100.00%	0
505	20nt,	3687	+/100.00%	0
506	20nt,	2083	+/100.00%	0
507	20nt,	1362	+/100.00%	0
508	20nt,	1093	+/100.00%	0
509	20nt,	1427	+/100.00%	0
510	20nt,	3406	+/100.00%	0
511	20nt,	9855	+/100.00%	0
512	20nt,	10731	+/100.00%	0
513	20nt,	23399	+/100.00%	0
514	20nt,	43017	+/100.00%	0
515	20nt,	47947	+/100.00%	0
516	20nt,	1378	+/100.00%	0
517	20nt,	1270	+/100.00%	0
518	20nt,	3893	+/100.00%	0
519	20nt,	3431	+/100.00%	0
520	20nt,	3188	+/100.00%	0
521	20nt,	1569	+/100.00%	0
522	20nt,	1008	+/100.00%	0
523	20nt,	1982	+/100.00%	0
524	20nt,	1029	+/100.00%	0
525	20nt,	1387	+/100.00%	0
526	20nt,	1363	+/100.00%	0
527	20nt,	50843	+/100.00%	0
528	20nt,	49982	+/100.00%	0
529	20nt,	27310	+/100.00%	0
530	20nt,	17766	+/100.00%	0
531	20nt,	11074	+/100.00%	0
532	20nt,	5104	+/100.00%	0
533	20nt,	2154	+/100.00%	0
534	20nt,	2106	+/100.00%	0
535	20nt,	1746	+/100.00%	0
536	20nt,	137777	+/100.00%	0
537	20nt,	5075	+/100.00%	0
538	20nt,	3947	+/100.00%	0
539	20nt,	3878	+/100.00%	0
540	20nt,	3695	+/100.00%	0
541	20nt,	3441	+/100.00%	0
542	20nt,	3143	+/100.00%	0
543	20nt,	2768	+/100.00%	0
544	20nt,	2712	+/100.00%	0
545	20nt,	2654	+/100.00%	0
546	20nt,	2519	+/100.00%	0
547	20nt,	2454	+/100.00%	0
548	20nt,	2336	+/100.00%	0
549	20nt,	2100	+/100.00%	0
550	20nt,	2095	+/100.00%	0
551	20nt,	2078	+/100.00%	0
552	20nt,	2069	+/100.00%	0
553	20nt,	1899	+/100.00%	0
554	20nt,	1553	+/100.00%	0
555	20nt,	1457	+/100.00%	0
556	20nt,	1434	+/100.00%	0
557	20nt,	1383	+/100.00%	0
558	20nt,	1337	+/100.00%	0
559	20nt,	1289	+/100.00%	0
560	20nt,	1287	+/100.00%	0
561	20nt,	1154	+/100.00%	0
562	20nt,	1145	+/100.00%	0
563	20nt,	1255	+/100.00%	0
564	20nt,	2565	+/100.00%	0
565	20nt,	1059	+/100.00%	0
566	20nt,	1198	+/100.00%	0
567	20nt,	1044	+/100.00%	0
568	20nt,	1007	+/100.00%	0
569	20nt,	4459	+/100.00%	0
570	20nt,	2978	+/100.00%	0
571	20nt,	1087	+/100.00%	0
572	20nt,	1576	+/100.00%	0
573	20nt,	2225	+/100.00%	0
574	20nt,	2550	+/100.00%	0
575	20nt,	2551	+/100.00%	0
576	20nt,	2579	+/100.00%	0
577	20nt,	2854	+/100.00%	0
578	20nt,	3151	+/100.00%	0
579	20nt,	3641	+/100.00%	0
580	20nt,	3841	+/100.00%	0
581	20nt,	3910	+/100.00%	0
582	20nt,	4148	+/100.00%	0
583	20nt,	5122	+/100.00%	0
584	20nt,	5597	+/100.00%	0
585	20nt,	639675	+/100.00%	0
586	20nt,	121193	+/100.00%	0
587	20nt,	13237	+/100.00%	0
588	20nt,	5152	+/100.00%	0
589	20nt,	606153	+/100.00%	0
590	20nt,	328433	+/100.00%	0
591	20nt,	46112	+/100.00%	0
592	20nt,	19930	+/100.00%	0
593	20nt,	7254	+/100.00%	0
594	20nt,	2400	+/100.00%	0
595	20nt,	1037	+/100.00%	0
596	20nt,	1789	+/100.00%	0
597	20nt,	1545	+/100.00%	0
598	20nt,	2815	+/100.00%	0
599	20nt,	2582	+/100.00%	0
600	20nt,	1427	+/100.00%	0
601	20nt,	1746	+/100.00%	0
602	20nt,	1277	+/100.00%	0
603	20nt,	1255	+/100.00%	0
604	20nt,	1449	+/100.00%	0
605	20nt,	1026	+/100.00%	0
606	20nt,	1292	+/100.00%	0
607	20nt,	1092	+/100.00%	0
608	20nt,	1348	+/100.00%	0
609	20nt,	1213	+/100.00%	0
610	20nt,	7710	+/100.00%	0
611	20nt,	6123	+/100.00%	0
612	20nt,	2638	+/100.00%	0
613	20nt,	1191	+/100.00%	0
614	20nt,	3831	+/100.00%	0
615	20nt,	3496	+/100.00%	0
616	20nt,	1817	+/100.00%	0
617	20nt,	5201	+/100.00%	0
618	20nt,	5132	+/100.00%	0
619	20nt,	3329	+/100.00%	0
620	20nt,	1669	+/100.00%	0
621	20nt,	1900	+/100.00%	0
622	20nt,	35723	+/100.00%	0
623	20nt,	34416	+/100.00%	0
624	20nt,	19571	+/100.00%	0
625	20nt,	8910	+/100.00%	0
626	20nt,	6931	+/100.00%	0
627	20nt,	2976	+/100.00%	0
628	20nt,	1377	+/100.00%	0
629	20nt,	3892	+/100.00%	0
630	20nt,	3635	+/100.00%	0
631	20nt,	1329	+/100.00%	0
632	20nt,	4283	+/100.00%	0
633	20nt,	1332	+/100.00%	0
634	20nt,	1071	+/100.00%	0
635	20nt,	1557	+/100.00%	0
636	20nt,	1183	+/100.00%	0
637	20nt,	1114	+/100.00%	0
638	20nt,	6779	+/100.00%	0
639	20nt,	5735	+/100.00%	0
640	20nt,	3147	+/100.00%	0
641	20nt,	1663	+/100.00%	0
642	20nt,	1431	+/100.00%	0
643	20nt,	27750	+/100.00%	0
644	20nt,	21644	+/100.00%	0
645	20nt,	10340	+/100.00%	0
646	20nt,	6005	+/100.00%	0
647	20nt,	4041	+/100.00%	0
648	20nt,	1312	+/100.00%	0
649	20nt,	30285	+/100.00%	0
650	20nt,	26502	+/100.00%	0
651	20nt,	14005	+/100.00%	0
652	20nt,	6836	+/100.00%	0
653	20nt,	5783	+/100.00%	0
654	20nt,	2040	+/100.00%	0
655	20nt,	3854	+/100.00%	0
656	20nt,	3590	+/100.00%	0
657	20nt,	2089	+/100.00%	0
658	20nt,	1984	+/100.00%	0
659	20nt,	1528	+/100.00%	0
660	20nt,	1343	+/100.00%	0
661	20nt,	2282	+/100.00%	0
662	20nt,	2069	+/100.00%	0
663	20nt,	1171	+/100.00%	0
664	20nt,	1972	+/100.00%	0
665	20nt,	1920	+/100.00%	0
666	20nt,	1027	+/100.00%	0
667	20nt,	1002	+/100.00%	0
668	20nt,	19790	+/100.00%	0
669	20nt,	18122	+/100.00%	0
670	20nt,	9464	+/100.00%	0
671	20nt,	3871	+/100.00%	0
672	20nt,	3688	+/100.00%	0
673	20nt,	1278	+/100.00%	0
674	20nt,	1057	+/100.00%	0
Cluster 30				12423	0.0922536
0	20nt,	2928		0
1	20nt,	2767	+/100.00%	0
2	20nt,	1973	+/100.00%	0
3	20nt,	1142	+/100.00%	0
4	20nt,	3613	+/100.00%	0
Cluster 31				28102	0.208686
0	20nt,	1435		0
1	20nt,	1166	+/100.00%	0
2	20nt,	1098	+/100.00%	0
3	20nt,	1449	+/100.00%	0
4	20nt,	2661	+/100.00%	0
5	20nt,	6797	+/100.00%	0
6	20nt,	4693	+/100.00%	0
7	20nt,	1780	+/100.00%	0
8	20nt,	3745	+/100.00%	0
9	20nt,	3278	+/100.00%	0
Cluster 32				3880	0.028813
0	20nt,	1577		0
1	20nt,	1293	+/100.00%	0
2	20nt,	1010	+/100.00%	0
Cluster 33				7140	0.0530219
0	20nt,	1402		0
1	20nt,	2455	+/100.00%	0
2	20nt,	2229	+/100.00%	0
3	20nt,	1054	+/100.00%	0
Cluster 34				11408	0.0847162
0	20nt,	1519		0
1	20nt,	1255	+/100.00%	0
2	20nt,	1573	+/100.00%	0
3	20nt,	1483	+/100.00%	0
4	20nt,	2352	+/100.00%	0
5	20nt,	2179	+/100.00%	0
6	20nt,	1047	+/100.00%	0
Cluster 35				1388	0.0103073
0	20nt,	1388		0
Cluster 36				1306	0.0096984
0	20nt,	1306		0
Cluster 37				3233	0.0240084
0	20nt,	1856		0
1	20nt,	1377	+/100.00%	0
Cluster 38				15391	0.114294
0	20nt,	8205		0
1	20nt,	5133	+/100.00%	0
2	20nt,	2053	+/100.00%	0
Cluster 39				214634	1.59388
0	20nt,	1045		0
1	20nt,	1788	+/100.00%	0
2	20nt,	1423	+/100.00%	0
3	20nt,	1225	+/100.00%	0
4	20nt,	1081	+/100.00%	0
5	20nt,	7977	+/100.00%	0
6	20nt,	2241	+/100.00%	0
7	20nt,	1309	+/100.00%	0
8	20nt,	3100	+/100.00%	0
9	20nt,	1918	+/100.00%	0
10	20nt,	2144	+/100.00%	0
11	20nt,	82406	+/100.00%	0
12	20nt,	2810	+/100.00%	0
13	20nt,	34736	+/100.00%	0
14	20nt,	1484	+/100.00%	0
15	20nt,	1094	+/100.00%	0
16	20nt,	3959	+/100.00%	0
17	20nt,	22103	+/100.00%	0
18	20nt,	1337	+/100.00%	0
19	20nt,	1485	+/100.00%	0
20	20nt,	1187	+/100.00%	0
21	20nt,	1363	+/100.00%	0
22	20nt,	2947	+/100.00%	0
23	20nt,	6540	+/100.00%	0
24	20nt,	5610	+/100.00%	0
25	20nt,	2887	+/100.00%	0
26	20nt,	1662	+/100.00%	0
27	20nt,	1093	+/100.00%	0
28	20nt,	1130	+/100.00%	0
29	20nt,	2253	+/100.00%	0
30	20nt,	1808	+/100.00%	0
31	20nt,	1568	+/100.00%	0
32	20nt,	3607	+/100.00%	0
33	20nt,	3100	+/100.00%	0
34	20nt,	1214	+/100.00%	0
Cluster 40				9280	0.0689136
0	20nt,	1279		0
1	20nt,	1037	+/100.00%	0
2	20nt,	2834	+/100.00%	0
3	20nt,	2628	+/100.00%	0
4	20nt,	1502	+/100.00%	0
Cluster 41				27309	0.202797
0	20nt,	2700		0
1	20nt,	2322	+/100.00%	0
2	20nt,	1736	+/100.00%	0
3	20nt,	1610	+/100.00%	0
4	20nt,	1140	+/100.00%	0
5	20nt,	1064	+/100.00%	0
6	20nt,	5481	+/100.00%	0
7	20nt,	5421	+/100.00%	0
8	20nt,	3213	+/100.00%	0
9	20nt,	1481	+/100.00%	0
10	20nt,	1141	+/100.00%	0
Cluster 42				2093	0.0155427
0	20nt,	1085		0
1	20nt,	1008	+/100.00%	0
Cluster 43				2442	0.0181344
0	20nt,	1281		0
1	20nt,	1161	+/100.00%	0
Cluster 44				2773	0.0205924
0	20nt,	1389		0
1	20nt,	1384	+/100.00%	0
Cluster 45				16625	0.123458
0	20nt,	12449		0
1	20nt,	4176	+/100.00%	0
Cluster 46				17666	0.131188
0	20nt,	1521		0
1	20nt,	1122	+/100.00%	0
2	20nt,	3895	+/100.00%	0
3	20nt,	8568	+/100.00%	0
4	20nt,	2560	+/100.00%	0
Cluster 47				59131	0.439109
0	20nt,	1229		0
1	20nt,	5418	+/100.00%	0
2	20nt,	4005	+/100.00%	0
3	20nt,	1974	+/100.00%	0
4	20nt,	1614	+/100.00%	0
5	20nt,	32949	+/100.00%	0
6	20nt,	10472	+/100.00%	0
7	20nt,	1470	+/100.00%	0
Cluster 48				1836762	13.6399
0	20nt,	1929		0
1	20nt,	1860	+/100.00%	0
2	20nt,	1492	+/100.00%	0
3	20nt,	1299	+/100.00%	0
4	20nt,	1044	+/100.00%	0
5	20nt,	3014	+/100.00%	0
6	20nt,	1214	+/100.00%	0
7	20nt,	1170	+/100.00%	0
8	20nt,	4758	+/100.00%	0
9	20nt,	2109	+/100.00%	0
10	20nt,	1819	+/100.00%	0
11	20nt,	1274	+/100.00%	0
12	20nt,	1256	+/100.00%	0
13	20nt,	5247	+/100.00%	0
14	20nt,	4171	+/100.00%	0
15	20nt,	4010	+/100.00%	0
16	20nt,	3769	+/100.00%	0
17	20nt,	2791	+/100.00%	0
18	20nt,	1358	+/100.00%	0
19	20nt,	10197	+/100.00%	0
20	20nt,	9063	+/100.00%	0
21	20nt,	6442	+/100.00%	0
22	20nt,	5787	+/100.00%	0
23	20nt,	3497	+/100.00%	0
24	20nt,	2600	+/100.00%	0
25	20nt,	1426	+/100.00%	0
26	20nt,	4599	+/100.00%	0
27	20nt,	1024	+/100.00%	0
28	20nt,	1023	+/100.00%	0
29	20nt,	12150	+/100.00%	0
30	20nt,	1810	+/100.00%	0
31	20nt,	1749	+/100.00%	0
32	20nt,	1584	+/100.00%	0
33	20nt,	1552	+/100.00%	0
34	20nt,	1198	+/100.00%	0
35	20nt,	1056	+/100.00%	0
36	20nt,	1202	+/100.00%	0
37	20nt,	1527	+/100.00%	0
38	20nt,	1752	+/100.00%	0
39	20nt,	1895	+/100.00%	0
40	20nt,	6069	+/100.00%	0
41	20nt,	1017	+/100.00%	0
42	20nt,	2097	+/100.00%	0
43	20nt,	1013	+/100.00%	0
44	20nt,	4069	+/100.00%	0
45	20nt,	1377	+/100.00%	0
46	20nt,	1715	+/100.00%	0
47	20nt,	1129	+/100.00%	0
48	20nt,	5854	+/100.00%	0
49	20nt,	5850	+/100.00%	0
50	20nt,	4030	+/100.00%	0
51	20nt,	2164	+/100.00%	0
52	20nt,	1618	+/100.00%	0
53	20nt,	1024	+/100.00%	0
54	20nt,	4632	+/100.00%	0
55	20nt,	4347	+/100.00%	0
56	20nt,	3659	+/100.00%	0
57	20nt,	3272	+/100.00%	0
58	20nt,	2239	+/100.00%	0
59	20nt,	1366	+/100.00%	0
60	20nt,	1286	+/100.00%	0
61	20nt,	5996	+/100.00%	0
62	20nt,	4122	+/100.00%	0
63	20nt,	1815	+/100.00%	0
64	20nt,	1698	+/100.00%	0
65	20nt,	1467	+/100.00%	0
66	20nt,	1093	+/100.00%	0
67	20nt,	1000	+/100.00%	0
68	20nt,	1136	+/100.00%	0
69	20nt,	1553	+/100.00%	0
70	20nt,	3632	+/100.00%	0
71	20nt,	1101	+/100.00%	0
72	20nt,	1357	+/100.00%	0
73	20nt,	1630	+/100.00%	0
74	20nt,	1867	+/100.00%	0
75	20nt,	1256	+/100.00%	0
76	20nt,	1974	+/100.00%	0
77	20nt,	5394	+/100.00%	0
78	20nt,	3459	+/100.00%	0
79	20nt,	2575	+/100.00%	0
80	20nt,	15924	+/100.00%	0
81	20nt,	2660	+/100.00%	0
82	20nt,	7304	+/100.00%	0
83	20nt,	1634	+/100.00%	0
84	20nt,	4338	+/100.00%	0
85	20nt,	1054	+/100.00%	0
86	20nt,	2063	+/100.00%	0
87	20nt,	1642	+/100.00%	0
88	20nt,	2435	+/100.00%	0
89	20nt,	1028	+/100.00%	0
90	20nt,	3933	+/100.00%	0
91	20nt,	2768	+/100.00%	0
92	20nt,	1706	+/100.00%	0
93	20nt,	1499	+/100.00%	0
94	20nt,	1847	+/100.00%	0
95	20nt,	1497	+/100.00%	0
96	20nt,	2810	+/100.00%	0
97	20nt,	1417	+/100.00%	0
98	20nt,	1700	+/100.00%	0
99	20nt,	2989	+/100.00%	0
100	20nt,	1331	+/100.00%	0
101	20nt,	3865	+/100.00%	0
102	20nt,	1215	+/100.00%	0
103	20nt,	3321	+/100.00%	0
104	20nt,	1193	+/100.00%	0
105	20nt,	15736	+/100.00%	0
106	20nt,	3230	+/100.00%	0
107	20nt,	8370	+/100.00%	0
108	20nt,	1914	+/100.00%	0
109	20nt,	1001	+/100.00%	0
110	20nt,	1239	+/100.00%	0
111	20nt,	7861	+/100.00%	0
112	20nt,	1674	+/100.00%	0
113	20nt,	4280	+/100.00%	0
114	20nt,	1003	+/100.00%	0
115	20nt,	3906	+/100.00%	0
116	20nt,	10367	+/100.00%	0
117	20nt,	4191	+/100.00%	0
118	20nt,	5227	+/100.00%	0
119	20nt,	1257	+/100.00%	0
120	20nt,	1139	+/100.00%	0
121	20nt,	3438	+/100.00%	0
122	20nt,	2948	+/100.00%	0
123	20nt,	2112	+/100.00%	0
124	20nt,	2003	+/100.00%	0
125	20nt,	1435	+/100.00%	0
126	20nt,	3616	+/100.00%	0
127	20nt,	1797	+/100.00%	0
128	20nt,	1194	+/100.00%	0
129	20nt,	4614	+/100.00%	0
130	20nt,	3500	+/100.00%	0
131	20nt,	2508	+/100.00%	0
132	20nt,	2429	+/100.00%	0
133	20nt,	1620	+/100.00%	0
134	20nt,	1541	+/100.00%	0
135	20nt,	1324	+/100.00%	0
136	20nt,	3146	+/100.00%	0
137	20nt,	2433	+/100.00%	0
138	20nt,	4465	+/100.00%	0
139	20nt,	4106	+/100.00%	0
140	20nt,	4021	+/100.00%	0
141	20nt,	3854	+/100.00%	0
142	20nt,	3817	+/100.00%	0
143	20nt,	3231	+/100.00%	0
144	20nt,	3001	+/100.00%	0
145	20nt,	2556	+/100.00%	0
146	20nt,	2460	+/100.00%	0
147	20nt,	2387	+/100.00%	0
148	20nt,	2344	+/100.00%	0
149	20nt,	2259	+/100.00%	0
150	20nt,	2210	+/100.00%	0
151	20nt,	2146	+/100.00%	0
152	20nt,	2042	+/100.00%	0
153	20nt,	2032	+/100.00%	0
154	20nt,	1969	+/100.00%	0
155	20nt,	1921	+/100.00%	0
156	20nt,	1904	+/100.00%	0
157	20nt,	1861	+/100.00%	0
158	20nt,	1845	+/100.00%	0
159	20nt,	1697	+/100.00%	0
160	20nt,	1648	+/100.00%	0
161	20nt,	1614	+/100.00%	0
162	20nt,	1604	+/100.00%	0
163	20nt,	1582	+/100.00%	0
164	20nt,	1549	+/100.00%	0
165	20nt,	1542	+/100.00%	0
166	20nt,	1537	+/100.00%	0
167	20nt,	1519	+/100.00%	0
168	20nt,	1496	+/100.00%	0
169	20nt,	1464	+/100.00%	0
170	20nt,	1416	+/100.00%	0
171	20nt,	1402	+/100.00%	0
172	20nt,	1399	+/100.00%	0
173	20nt,	1363	+/100.00%	0
174	20nt,	1359	+/100.00%	0
175	20nt,	1317	+/100.00%	0
176	20nt,	1301	+/100.00%	0
177	20nt,	1293	+/100.00%	0
178	20nt,	1284	+/100.00%	0
179	20nt,	1284	+/100.00%	0
180	20nt,	1282	+/100.00%	0
181	20nt,	1274	+/100.00%	0
182	20nt,	1256	+/100.00%	0
183	20nt,	1234	+/100.00%	0
184	20nt,	1225	+/100.00%	0
185	20nt,	1212	+/100.00%	0
186	20nt,	1212	+/100.00%	0
187	20nt,	1184	+/100.00%	0
188	20nt,	1147	+/100.00%	0
189	20nt,	1116	+/100.00%	0
190	20nt,	1115	+/100.00%	0
191	20nt,	1099	+/100.00%	0
192	20nt,	1078	+/100.00%	0
193	20nt,	1072	+/100.00%	0
194	20nt,	2098	+/100.00%	0
195	20nt,	1461	+/100.00%	0
196	20nt,	8746	+/100.00%	0
197	20nt,	1731	+/100.00%	0
198	20nt,	1511	+/100.00%	0
199	20nt,	5520	+/100.00%	0
200	20nt,	1190	+/100.00%	0
201	20nt,	5943	+/100.00%	0
202	20nt,	1284	+/100.00%	0
203	20nt,	5721	+/100.00%	0
204	20nt,	1357	+/100.00%	0
205	20nt,	11378	+/100.00%	0
206	20nt,	2510	+/100.00%	0
207	20nt,	32865	+/100.00%	0
208	20nt,	21985	+/100.00%	0
209	20nt,	15739	+/100.00%	0
210	20nt,	11563	+/100.00%	0
211	20nt,	4687	+/100.00%	0
212	20nt,	2504	+/100.00%	0
213	20nt,	1621	+/100.00%	0
214	20nt,	2102	+/100.00%	0
215	20nt,	3202	+/100.00%	0
216	20nt,	7621	+/100.00%	0
217	20nt,	1560	+/100.00%	0
218	20nt,	1126	+/100.00%	0
219	20nt,	10887	+/100.00%	0
220	20nt,	1222	+/100.00%	0
221	20nt,	2314	+/100.00%	0
222	20nt,	13441	+/100.00%	0
223	20nt,	1564	+/100.00%	0
224	20nt,	1016	+/100.00%	0
225	20nt,	1086	+/100.00%	0
226	20nt,	1354	+/100.00%	0
227	20nt,	4474	+/100.00%	0
228	20nt,	20050	+/100.00%	0
229	20nt,	174452	+/100.00%	0
230	20nt,	809932	+/100.00%	0
231	20nt,	7050	+/100.00%	0
232	20nt,	6672	+/100.00%	0
233	20nt,	5650	+/100.00%	0
234	20nt,	5189	+/100.00%	0
235	20nt,	5020	+/100.00%	0
236	20nt,	4706	+/100.00%	0
237	20nt,	4101	+/100.00%	0
238	20nt,	3612	+/100.00%	0
239	20nt,	3369	+/100.00%	0
240	20nt,	3277	+/100.00%	0
241	20nt,	3266	+/100.00%	0
242	20nt,	2724	+/100.00%	0
243	20nt,	1947	+/100.00%	0
244	20nt,	1523	+/100.00%	0
245	20nt,	1438	+/100.00%	0
246	20nt,	1293	+/100.00%	0
247	20nt,	1175	+/100.00%	0
248	20nt,	1143	+/100.00%	0
249	20nt,	1084	+/100.00%	0
250	20nt,	1072	+/100.00%	0
251	20nt,	1045	+/100.00%	0
252	20nt,	1015	+/100.00%	0
253	20nt,	3372	+/100.00%	0
254	20nt,	1050	+/100.00%	0
255	20nt,	2123	+/100.00%	0
256	20nt,	2150	+/100.00%	0
257	20nt,	1040	+/100.00%	0
258	20nt,	1599	+/100.00%	0
259	20nt,	1984	+/100.00%	0
260	20nt,	1576	+/100.00%	0
261	20nt,	2549	+/100.00%	0
262	20nt,	6589	+/100.00%	0
263	20nt,	4298	+/100.00%	0
264	20nt,	1433	+/100.00%	0
265	20nt,	1105	+/100.00%	0
266	20nt,	2106	+/100.00%	0
267	20nt,	1078	+/100.00%	0
268	20nt,	1203	+/100.00%	0
269	20nt,	2874	+/100.00%	0
270	20nt,	1149	+/100.00%	0
271	20nt,	5511	+/100.00%	0
272	20nt,	4337	+/100.00%	0
273	20nt,	1718	+/100.00%	0
274	20nt,	2813	+/100.00%	0
275	20nt,	2352	+/100.00%	0
276	20nt,	1063	+/100.00%	0
Cluster 49				13636	0.101261
0	20nt,	1081		0
1	20nt,	1734	+/100.00%	0
2	20nt,	1332	+/100.00%	0
3	20nt,	1129	+/100.00%	0
4	20nt,	1067	+/100.00%	0
5	20nt,	2748	+/100.00%	0
6	20nt,	1948	+/100.00%	0
7	20nt,	1528	+/100.00%	0
8	20nt,	1069	+/100.00%	0
Cluster 50				14533	0.107923
0	20nt,	4114		0
1	20nt,	4003	+/100.00%	0
2	20nt,	3105	+/100.00%	0
3	20nt,	1749	+/100.00%	0
4	20nt,	1562	+/100.00%	0
Cluster 51				141602	1.05154
0	20nt,	1409		0
1	20nt,	2378	+/100.00%	0
2	20nt,	3351	+/100.00%	0
3	20nt,	2992	+/100.00%	0
4	20nt,	1728	+/100.00%	0
5	20nt,	1143	+/100.00%	0
6	20nt,	2738	+/100.00%	0
7	20nt,	1691	+/100.00%	0
8	20nt,	1413	+/100.00%	0
9	20nt,	1221	+/100.00%	0
10	20nt,	1157	+/100.00%	0
11	20nt,	1072	+/100.00%	0
12	20nt,	1024	+/100.00%	0
13	20nt,	1464	+/100.00%	0
14	20nt,	80437	+/100.00%	0
15	20nt,	1285	+/100.00%	0
16	20nt,	1498	+/100.00%	0
17	20nt,	1196	+/100.00%	0
18	20nt,	1009	+/100.00%	0
19	20nt,	5589	+/100.00%	0
20	20nt,	1055	+/100.00%	0
21	20nt,	1097	+/100.00%	0
22	20nt,	2058	+/100.00%	0
23	20nt,	2638	+/100.00%	0
24	20nt,	1203	+/100.00%	0
25	20nt,	3274	+/100.00%	0
26	20nt,	1234	+/100.00%	0
27	20nt,	1607	+/100.00%	0
28	20nt,	5608	+/100.00%	0
29	20nt,	3594	+/100.00%	0
30	20nt,	1438	+/100.00%	0
31	20nt,	1001	+/100.00%	0
Cluster 52				1222	0.00907461
0	20nt,	1222		0
Cluster 53				2572	0.0190998
0	20nt,	2572		0
Cluster 54				45564	0.33836
0	20nt,	5765		0
1	20nt,	1730	+/100.00%	0
2	20nt,	1521	+/100.00%	0
3	20nt,	2137	+/100.00%	0
4	20nt,	1348	+/100.00%	0
5	20nt,	25870	+/100.00%	0
6	20nt,	2561	+/100.00%	0
7	20nt,	1157	+/100.00%	0
8	20nt,	2041	+/100.00%	0
9	20nt,	1434	+/100.00%	0
Cluster 55				36495	0.271013
0	20nt,	22941		0
1	20nt,	4299	+/100.00%	0
2	20nt,	1753	+/100.00%	0
3	20nt,	3521	+/100.00%	0
4	20nt,	1800	+/100.00%	0
5	20nt,	2181	+/100.00%	0
Cluster 56				1844365	13.6963
0	20nt,	1292		0
1	20nt,	4309	+/100.00%	0
2	20nt,	2526	+/100.00%	0
3	20nt,	2148	+/100.00%	0
4	20nt,	1416	+/100.00%	0
5	20nt,	2064	+/100.00%	0
6	20nt,	1627	+/100.00%	0
7	20nt,	1075	+/100.00%	0
8	20nt,	2682	+/100.00%	0
9	20nt,	1972	+/100.00%	0
10	20nt,	1062	+/100.00%	0
11	20nt,	1013	+/100.00%	0
12	20nt,	11484	+/100.00%	0
13	20nt,	8287	+/100.00%	0
14	20nt,	3738	+/100.00%	0
15	20nt,	2888	+/100.00%	0
16	20nt,	1388	+/100.00%	0
17	20nt,	6616	+/100.00%	0
18	20nt,	5048	+/100.00%	0
19	20nt,	2579	+/100.00%	0
20	20nt,	2000	+/100.00%	0
21	20nt,	1018	+/100.00%	0
22	20nt,	1075	+/100.00%	0
23	20nt,	1647	+/100.00%	0
24	20nt,	1299	+/100.00%	0
25	20nt,	1130	+/100.00%	0
26	20nt,	1154	+/100.00%	0
27	20nt,	1333	+/100.00%	0
28	20nt,	1412	+/100.00%	0
29	20nt,	1376	+/100.00%	0
30	20nt,	1365	+/100.00%	0
31	20nt,	1340	+/100.00%	0
32	20nt,	1314	+/100.00%	0
33	20nt,	1265	+/100.00%	0
34	20nt,	1239	+/100.00%	0
35	20nt,	1223	+/100.00%	0
36	20nt,	1197	+/100.00%	0
37	20nt,	1149	+/100.00%	0
38	20nt,	1136	+/100.00%	0
39	20nt,	1101	+/100.00%	0
40	20nt,	1068	+/100.00%	0
41	20nt,	1063	+/100.00%	0
42	20nt,	1040	+/100.00%	0
43	20nt,	1017	+/100.00%	0
44	20nt,	1005	+/100.00%	0
45	20nt,	3005	+/100.00%	0
46	20nt,	1880	+/100.00%	0
47	20nt,	2053	+/100.00%	0
48	20nt,	1834	+/100.00%	0
49	20nt,	1337	+/100.00%	0
50	20nt,	1062	+/100.00%	0
51	20nt,	1764	+/100.00%	0
52	20nt,	1270	+/100.00%	0
53	20nt,	1320	+/100.00%	0
54	20nt,	1156	+/100.00%	0
55	20nt,	1416	+/100.00%	0
56	20nt,	1115	+/100.00%	0
57	20nt,	2692	+/100.00%	0
58	20nt,	2034	+/100.00%	0
59	20nt,	2593	+/100.00%	0
60	20nt,	1828	+/100.00%	0
61	20nt,	2540	+/100.00%	0
62	20nt,	1835	+/100.00%	0
63	20nt,	2388	+/100.00%	0
64	20nt,	1620	+/100.00%	0
65	20nt,	2317	+/100.00%	0
66	20nt,	1708	+/100.00%	0
67	20nt,	2121	+/100.00%	0
68	20nt,	1547	+/100.00%	0
69	20nt,	2117	+/100.00%	0
70	20nt,	1543	+/100.00%	0
71	20nt,	1970	+/100.00%	0
72	20nt,	1474	+/100.00%	0
73	20nt,	1736	+/100.00%	0
74	20nt,	1287	+/100.00%	0
75	20nt,	1616	+/100.00%	0
76	20nt,	1184	+/100.00%	0
77	20nt,	1554	+/100.00%	0
78	20nt,	1094	+/100.00%	0
79	20nt,	1515	+/100.00%	0
80	20nt,	1110	+/100.00%	0
81	20nt,	1437	+/100.00%	0
82	20nt,	1237	+/100.00%	0
83	20nt,	1431	+/100.00%	0
84	20nt,	1074	+/100.00%	0
85	20nt,	1363	+/100.00%	0
86	20nt,	1179	+/100.00%	0
87	20nt,	1299	+/100.00%	0
88	20nt,	1171	+/100.00%	0
89	20nt,	1640	+/100.00%	0
90	20nt,	4640	+/100.00%	0
91	20nt,	4164	+/100.00%	0
92	20nt,	2114	+/100.00%	0
93	20nt,	1237	+/100.00%	0
94	20nt,	4119	+/100.00%	0
95	20nt,	3166	+/100.00%	0
96	20nt,	1473	+/100.00%	0
97	20nt,	1094	+/100.00%	0
98	20nt,	3581	+/100.00%	0
99	20nt,	2631	+/100.00%	0
100	20nt,	1256	+/100.00%	0
101	20nt,	1044	+/100.00%	0
102	20nt,	1368	+/100.00%	0
103	20nt,	1335	+/100.00%	0
104	20nt,	1125	+/100.00%	0
105	20nt,	2675	+/100.00%	0
106	20nt,	1381	+/100.00%	0
107	20nt,	1371	+/100.00%	0
108	20nt,	3033	+/100.00%	0
109	20nt,	2206	+/100.00%	0
110	20nt,	1126	+/100.00%	0
111	20nt,	3478	+/100.00%	0
112	20nt,	2452	+/100.00%	0
113	20nt,	1156	+/100.00%	0
114	20nt,	3245	+/100.00%	0
115	20nt,	2438	+/100.00%	0
116	20nt,	1134	+/100.00%	0
117	20nt,	3131	+/100.00%	0
118	20nt,	2456	+/100.00%	0
119	20nt,	1232	+/100.00%	0
120	20nt,	2588	+/100.00%	0
121	20nt,	1940	+/100.00%	0
122	20nt,	1059	+/100.00%	0
123	20nt,	8418	+/100.00%	0
124	20nt,	6294	+/100.00%	0
125	20nt,	3078	+/100.00%	0
126	20nt,	2365	+/100.00%	0
127	20nt,	1143	+/100.00%	0
128	20nt,	4970	+/100.00%	0
129	20nt,	4838	+/100.00%	0
130	20nt,	3041	+/100.00%	0
131	20nt,	1711	+/100.00%	0
132	20nt,	1452	+/100.00%	0
133	20nt,	4220	+/100.00%	0
134	20nt,	3221	+/100.00%	0
135	20nt,	2161	+/100.00%	0
136	20nt,	1375	+/100.00%	0
137	20nt,	1017	+/100.00%	0
138	20nt,	4866	+/100.00%	0
139	20nt,	3677	+/100.00%	0
140	20nt,	1855	+/100.00%	0
141	20nt,	1498	+/100.00%	0
142	20nt,	2541	+/100.00%	0
143	20nt,	2056	+/100.00%	0
144	20nt,	1108	+/100.00%	0
145	20nt,	3205	+/100.00%	0
146	20nt,	3155	+/100.00%	0
147	20nt,	2869	+/100.00%	0
148	20nt,	2800	+/100.00%	0
149	20nt,	2563	+/100.00%	0
150	20nt,	2479	+/100.00%	0
151	20nt,	2354	+/100.00%	0
152	20nt,	2329	+/100.00%	0
153	20nt,	2267	+/100.00%	0
154	20nt,	2077	+/100.00%	0
155	20nt,	2030	+/100.00%	0
156	20nt,	1996	+/100.00%	0
157	20nt,	1889	+/100.00%	0
158	20nt,	1801	+/100.00%	0
159	20nt,	1725	+/100.00%	0
160	20nt,	1706	+/100.00%	0
161	20nt,	1580	+/100.00%	0
162	20nt,	1577	+/100.00%	0
163	20nt,	1562	+/100.00%	0
164	20nt,	1562	+/100.00%	0
165	20nt,	1400	+/100.00%	0
166	20nt,	1341	+/100.00%	0
167	20nt,	1275	+/100.00%	0
168	20nt,	1256	+/100.00%	0
169	20nt,	1249	+/100.00%	0
170	20nt,	1191	+/100.00%	0
171	20nt,	1168	+/100.00%	0
172	20nt,	1132	+/100.00%	0
173	20nt,	1131	+/100.00%	0
174	20nt,	1494	+/100.00%	0
175	20nt,	1615	+/100.00%	0
176	20nt,	2764	+/100.00%	0
177	20nt,	1511	+/100.00%	0
178	20nt,	2069	+/100.00%	0
179	20nt,	2513	+/100.00%	0
180	20nt,	1331	+/100.00%	0
181	20nt,	2325	+/100.00%	0
182	20nt,	5360	+/100.00%	0
183	20nt,	9461	+/100.00%	0
184	20nt,	3233	+/100.00%	0
185	20nt,	3395	+/100.00%	0
186	20nt,	3600	+/100.00%	0
187	20nt,	4358	+/100.00%	0
188	20nt,	4482	+/100.00%	0
189	20nt,	519689	+/100.00%	0
190	20nt,	390092	+/100.00%	0
191	20nt,	195825	+/100.00%	0
192	20nt,	152276	+/100.00%	0
193	20nt,	75856	+/100.00%	0
194	20nt,	23024	+/100.00%	0
195	20nt,	20549	+/100.00%	0
196	20nt,	9693	+/100.00%	0
197	20nt,	3306	+/100.00%	0
198	20nt,	1085	+/100.00%	0
199	20nt,	28097	+/100.00%	0
200	20nt,	8160	+/100.00%	0
201	20nt,	1438	+/100.00%	0
202	20nt,	1096	+/100.00%	0
Cluster 57				1151	0.00854736
0	20nt,	1151		0
Cluster 58				1017	0.00755227
0	20nt,	1017		0
Cluster 59				2597	0.0192854
0	20nt,	1477		0
1	20nt,	1120	+/100.00%	0
Cluster 60				3917	0.0290878
0	20nt,	2315		0
1	20nt,	1602	+/100.00%	0
Cluster 61				4286	0.031828
0	20nt,	2461		0
1	20nt,	1825	+/100.00%	0
Cluster 62				6041	0.0448607
0	20nt,	2792		0
1	20nt,	2158	+/100.00%	0
2	20nt,	1091	+/100.00%	0
Cluster 63				20184	0.149887
0	20nt,	2819		0
1	20nt,	2048	+/100.00%	0
2	20nt,	1124	+/100.00%	0
3	20nt,	5684	+/100.00%	0
4	20nt,	4473	+/100.00%	0
5	20nt,	2315	+/100.00%	0
6	20nt,	1721	+/100.00%	0
Cluster 64				29289	0.217501
0	20nt,	10185		0
1	20nt,	8210	+/100.00%	0
2	20nt,	4462	+/100.00%	0
3	20nt,	2950	+/100.00%	0
4	20nt,	1932	+/100.00%	0
5	20nt,	1550	+/100.00%	0
Cluster 65				1164	0.0086439
0	20nt,	1164		0
Cluster 66				1403	0.0104187
0	20nt,	1403		0
Cluster 67				1198	0.00889638
0	20nt,	1198		0
Cluster 68				1362	0.0101143
0	20nt,	1362		0
Cluster 69				3638	0.0270159
0	20nt,	2309		0
1	20nt,	1329	+/100.00%	0
Cluster 70				2506	0.0186096
0	20nt,	2506		0
Cluster 71				1285	0.00954245
0	20nt,	1285		0
Cluster 72				2811	0.0208746
0	20nt,	2811		0
Cluster 73				2443	0.0181418
0	20nt,	2443		0
Cluster 74				1581	0.0117406
0	20nt,	1581		0
Cluster 75				1429	0.0106118
0	20nt,	1429		0
Cluster 76				1293	0.00960186
0	20nt,	1293		0
Cluster 77				48084	0.357073
0	20nt,	1968		0
1	20nt,	4692	+/100.00%	0
2	20nt,	11355	+/100.00%	0
3	20nt,	5840	+/100.00%	0
4	20nt,	2097	+/100.00%	0
5	20nt,	1122	+/100.00%	0
6	20nt,	9906	+/100.00%	0
7	20nt,	8618	+/100.00%	0
8	20nt,	2486	+/100.00%	0
Cluster 78				1992	0.0147927
0	20nt,	1992		0
Cluster 79				1704	0.012654
0	20nt,	1704		0
Cluster 80				9628	0.0714978
0	20nt,	1296		0
1	20nt,	3624	+/100.00%	0
2	20nt,	3000	+/100.00%	0
3	20nt,	1708	+/100.00%	0
Cluster 81				1464	0.0108717
0	20nt,	1464		0
Cluster 82				7109	0.0527917
0	20nt,	2777		0
1	20nt,	2569	+/100.00%	0
2	20nt,	1763	+/100.00%	0
Cluster 83				1232	0.00914887
0	20nt,	1232		0
Cluster 84				1986	0.0147481
0	20nt,	1986		0
Cluster 85				1238	0.00919343
0	20nt,	1238		0
Cluster 86				14834	0.110158
0	19nt,	10767		0
1	19nt,	4067	+/100.00%	0
Cluster 87				1054	0.00782704
0	19nt,	1054		0
Cluster 88				12675	0.0941249
0	19nt,	2245		0
1	19nt,	9135	+/100.00%	0
2	19nt,	1295	+/100.00%	0
Cluster 89				1475	0.0109534
0	19nt,	1475		0
Cluster 90				2046	0.0151937
0	19nt,	1035		0
1	19nt,	1011	+/100.00%	0
Cluster 91				14832	0.110143
0	19nt,	1119		0
1	19nt,	1133	+/100.00%	0
2	19nt,	4331	+/100.00%	0
3	19nt,	3904	+/100.00%	0
4	19nt,	1789	+/100.00%	0
5	19nt,	1351	+/100.00%	0
6	19nt,	1205	+/100.00%	0
Cluster 92				4370	0.0324518
0	19nt,	1565		0
1	19nt,	1519	+/100.00%	0
2	19nt,	1286	+/100.00%	0
Cluster 93				37710	0.280036
0	19nt,	4402		0
1	19nt,	4321	+/100.00%	0
2	19nt,	3475	+/100.00%	0
3	19nt,	2324	+/100.00%	0
4	19nt,	2187	+/100.00%	0
5	19nt,	1562	+/100.00%	0
6	19nt,	1754	+/100.00%	0
7	19nt,	1652	+/100.00%	0
[truncated: 59 more rows]

## Sheet: R14
Cluster 0				2387	0.0489127	Cluster % Total	Reads
0	20nt,	1289		0		100	4880124						2337		2337	CCGCACTGACTAGTC
1	20nt,	1098	+/100.00%	0		Cluster	Representation	Representative	Sequence	Alt Sequence 1	Alt Sequence 2	Alt Sequence 3	CCGCACTGACTAGTC		1289	CCGCACAAAATAGCTCGAAC
Cluster 1				4640	0.0950796	0	0.0489127	1289	CCGCACAAAATAGCTCGAAC				1289		4640	CCGCACAATATAGCGCCATC
0	20nt,	4640		0		1	0.0950796	4640	CCGCACAATATAGCGCCATC				CCGCACAAAATAGCTCGAAC		2507	CCGCACGAAATGGCTCGAAG
Cluster 2				8579	0.175795	2	0.175795	2507	CCGCACGAAATGGCTCGAAG				4640		5757	CCGCACAAATGGCTCGAAG
0	20nt,	2507		0		3	6.55367	6665	CCGCACAAAATGGCTCGAAG				CCGCACAATATAGCGCCATC		6665	CCGCACAAAATGGCTCGAAG
1	20nt,	1489	+/100.00%	0		4	0.0961861	3000	CCGCACAAAATGGCTCGAGG				2507		3000	CCGCACAAAATGGCTCGAGG
2	20nt,	1043	+/100.00%	0		5	0.0400605	1955	CCGCACAAGATGGCTCGAAG				CCGCACGAAATGGCTCGAAG		1955	CCGCACAAGATGGCTCGAAG
3	20nt,	3540	+/100.00%	0		6	0.0310033	1513	CCGCACAAATTAGAGCCAAC				5757		1513	CCGCACAAATTAGAGCCAAC
Cluster 3				319827	6.55367	7	0.0238519	1164	CCGCACAAAATGGCGCCAAC				CCGCACAAATGGCTCGAAG		1164	CCGCACAAAATGGCGCCAAC
0	20nt,	6665		0		8	0.143582	4250	CCGCACAAAATTGTGCCAAC				6665		4250	CCGCACAAAATTGTGCCAAC
1	20nt,	2606	+/100.00%	0		9	0.207761	2969	CCGCACAAAATAGCGCCATC				CCGCACAAAATGGCTCGAAG		1707	CCGCACAAATTGTGCCAAC
2	20nt,	2615	+/100.00%	0		10	9.25196	13529	CCGCACAAAATAGCGCCAAC				3000		2969	CCGCACAAAATAGCGCCATC
3	20nt,	6350	+/100.00%	0		11	0.116841	4052	CCGCACAAAATCGCGCCAAC				CCGCACAAAATGGCTCGAGG		13529	CCGCACAAAATAGCGCCAAC
4	20nt,	6291	+/100.00%	0		12	2.49924	2689	CCGCACTAAATAGTGCCAAC				1955		1781	CCGCACAAATAGCGCCAAC
5	20nt,	1908	+/100.00%	0		13	0.250793	3672	CCGCACGAATTCGTGCCACC				CCGCACAAGATGGCTCGAAG		4052	CCGCACAAAATCGCGCCAAC
6	20nt,	2275	+/100.00%	0		14	61.7244	2383	CCGCACGAAATCGTGCCACC				1513		2689	CCGCACTAAATAGTGCCAAC
7	20nt,	1988	+/100.00%	0		15	2.06599	14392	CCGCACGAAATCGTGCCAAC				CCGCACAAATTAGAGCCAAC		3672	CCGCACGAATTCGTGCCACC
8	20nt,	1993	+/100.00%	0		16	0.835962	7675	CCGCACAGAACTGTGCCACC				1164		1398	CCGCACGAATCGTGCCACC
9	20nt,	3108	+/100.00%	0		17	0.25403	1536	CCGCACAGAACTGTGCCAAC				CCGCACAAAATGGCGCCAAC		2383	CCGCACGAAATCGTGCCACC
10	20nt,	3016	+/100.00%	0		18	0.44044	7484	CCGCACTAAATAGTGCCACC				4250		14392	CCGCACGAAATCGTGCCAAC
11	20nt,	1397	+/100.00%	0		19	0.0427448	1051	CCGCACTAAATAGTGCCATC				CCGCACAAAATTGTGCCAAC		7675	CCGCACAGAACTGTGCCACC
12	20nt,	1856	+/100.00%	0		20	0.0244871	1195	CCGCACGAACTCGTGCCACC	CCGCACGAAACCGTGCCACC			1707		1536	CCGCACAGAACTGTGCCAAC
13	20nt,	1098	+/100.00%	0		21	0.0424374	2071	CCGCACAAAATCGCCCCACC				CCGCACAAATTGTGCCAAC		1032	CCGCACAAATGTGCCACC
14	20nt,	3837	+/100.00%	0		22	0.0225814	1102	CCGCACGAAATCGTCCCACC				2969		7484	CCGCACTAAATAGTGCCACC
15	20nt,	1768	+/100.00%	0		23	0.0227043	1108	CCGCACGAAATCGTACCACC				CCGCACAAAATAGCGCCATC		1051	CCGCACTAAATAGTGCCATC
16	20nt,	3459	+/100.00%	0		24	0.0268436	1310	CCGCACGAAATCGTTCCACC				13529		3872	CCGCACTAATAGTGCCACC
17	20nt,	2064	+/100.00%	0		25	10.0478	1306	CCGCACAAAATTGTGCCACC				CCGCACAAAATAGCGCCAAC		1195	CCGCACGAACTCGTGCCACC
18	20nt,	3956	+/100.00%	0		26	0.187926	1091	CCGCACGAAATTGTGCCACC				1781		2071	CCGCACAAAATCGCCCCACC
19	20nt,	1407	+/100.00%	0		27	0.03295	1608	CCGCACTAAATCGTGCCACC				CCGCACAAATAGCGCCAAC		1102	CCGCACGAAATCGTCCCACC
20	20nt,	6583	+/100.00%	0		28	0.494168	10771	CCGCACAAAATCGTGCCACC				4052		1108	CCGCACGAAATCGTACCACC
21	20nt,	1269	+/100.00%	0		29	0.0297533	1452	CCGCACGATATCGTGCCACC				CCGCACAAAATCGCGCCAAC		1310	CCGCACGAAATCGTTCCACC
22	20nt,	2406	+/100.00%	0		30	0.0292616	1428	CCGCACGAAATCGCGCCACC				2689		1306	CCGCACAAAATTGTGCCACC
23	20nt,	1255	+/100.00%	0		31	0.0244871	1195	CCGCACGAACTCGTGCCACC	CCGCACGAAACCGTGCCACC			CCGCACTAAATAGTGCCAAC		1091	CCGCACGAAATTGTGCCACC
24	20nt,	11555	+/100.00%	0		32	0.0223765	1092	CCGCACGAAATCGTGCCACT				3672		4055	CCGCACAAATTGTGCCACC
25	20nt,	3171	+/100.00%	0		33	0.0221306	1080	CCGCACGAAATCGTGCCTCC				CCGCACGAATTCGTGCCACC		1608	CCGCACTAAATCGTGCCACC
26	20nt,	8817	+/100.00%	0		34	0.0326631	1594	CCGCACGAAGTCGTGCCACC				1398		10771	CCGCACAAAATCGTGCCACC
27	20nt,	5746	+/100.00%	0		35	0.103071	3215	CCGCACGAGATCGTGCCACC				CCGCACGAATCGTGCCACC		1452	CCGCACGATATCGTGCCACC
28	20nt,	2073	+/100.00%	0		36	0.0800389	2613	CCGCACGAAATCTTGCCACC				2383		1428	CCGCACGAAATCGCGCCACC
29	20nt,	4129	+/100.00%	0		37	0.0813914	2472	CCGCACGAAATCGTGCCGCC				CCGCACGAAATCGTGCCACC		1195	CCGCACGAAACCGTGCCACC
30	20nt,	3498	+/100.00%	0		38	0.0263518	1286	CCGCACGGAATCGTGCCACC				14392		1092	CCGCACGAAATCGTGCCACT
31	20nt,	2666	+/100.00%	0		39	0.117968	5757	CCGCACAAATGGCTCGAAG				CCGCACGAAATCGTGCCAAC		1080	CCGCACGAAATCGTGCCTCC
32	20nt,	1747	+/100.00%	0		40	0.0349786	1707	CCGCACAAATTGTGCCAAC				7675		1594	CCGCACGAAGTCGTGCCACC
33	20nt,	2133	+/100.00%	0		41	0.0773956	1781	CCGCACAAATAGCGCCAAC				CCGCACAGAACTGTGCCACC		3215	CCGCACGAGATCGTGCCACC
34	20nt,	1226	+/100.00%	0		42	1.65652	1398	CCGCACGAATCGTGCCACC				1536		2613	CCGCACGAAATCTTGCCACC
35	20nt,	2178	+/100.00%	0		43	0.253088	3872	CCGCACTAATAGTGCCACC				CCGCACAGAACTGTGCCAAC		2472	CCGCACGAAATCGTGCCGCC
36	20nt,	1132	+/100.00%	0		44	0.281755	4055	CCGCACAAATTGTGCCACC				1032		1286	CCGCACGGAATCGTGCCACC
37	20nt,	1020	+/100.00%	0		45	1.2787	1032	CCGCACAAATGTGCCACC				CCGCACAAATGTGCCACC			end
38	20nt,	1004	+/100.00%	0		46	0.0478881	2337	CCGCACTGACTAGTC				7484
39	20nt,	1887	+/100.00%	0		47	0	#N/A	#N/A				CCGCACTAAATAGTGCCACC
40	20nt,	1262	+/100.00%	0		48	#N/A	#N/A	#N/A				1051
41	20nt,	1862	+/100.00%	0		49	#N/A	#N/A	#N/A				CCGCACTAAATAGTGCCATC
42	20nt,	1449	+/100.00%	0		50	#N/A	#N/A	#N/A				3872
43	20nt,	1204	+/100.00%	0		51	#N/A	#N/A	#N/A				CCGCACTAATAGTGCCACC
44	20nt,	2712	+/100.00%	0		52	#N/A	#N/A	#N/A				1195
45	20nt,	2017	+/100.00%	0		53	#N/A	#N/A	#N/A				CCGCACGAACTCGTGCCACC
46	20nt,	6051	+/100.00%	0		54	#N/A	#N/A	#N/A				2071
47	20nt,	1674	+/100.00%	0		55	#N/A	#N/A	#N/A				CCGCACAAAATCGCCCCACC
48	20nt,	4039	+/100.00%	0		56	#N/A	#N/A	#N/A				1102
49	20nt,	3153	+/100.00%	0		57	#N/A	#N/A	#N/A				CCGCACGAAATCGTCCCACC
50	20nt,	1830	+/100.00%	0		58	#N/A	#N/A	#N/A				1108
51	20nt,	1565	+/100.00%	0		59	#N/A	#N/A	#N/A				CCGCACGAAATCGTACCACC
52	20nt,	1389	+/100.00%	0		60	#N/A	#N/A	#N/A				1310
53	20nt,	1192	+/100.00%	0		61	#N/A	#N/A	#N/A				CCGCACGAAATCGTTCCACC
54	20nt,	1095	+/100.00%	0		62	#N/A	#N/A	#N/A				1306
55	20nt,	12118	+/100.00%	0		63	#N/A	#N/A	#N/A				CCGCACAAAATTGTGCCACC
56	20nt,	3373	+/100.00%	0		64	#N/A	#N/A	#N/A				1091
57	20nt,	12279	+/100.00%	0		65	#N/A	#N/A	#N/A				CCGCACGAAATTGTGCCACC
58	20nt,	5670	+/100.00%	0		66	#N/A	#N/A	#N/A				4055
59	20nt,	3065	+/100.00%	0		67	#N/A	#N/A	#N/A				CCGCACAAATTGTGCCACC
60	20nt,	2579	+/100.00%	0		68	#N/A	#N/A	#N/A				1608
61	20nt,	7250	+/100.00%	0		69	#N/A	#N/A	#N/A				CCGCACTAAATCGTGCCACC
62	20nt,	7015	+/100.00%	0		70	#N/A	#N/A	#N/A				10771
63	20nt,	4846	+/100.00%	0		71	#N/A	#N/A	#N/A				CCGCACAAAATCGTGCCACC
64	20nt,	4083	+/100.00%	0		72	#N/A	#N/A	#N/A				1452
65	20nt,	3769	+/100.00%	0		73	#N/A	#N/A	#N/A				CCGCACGATATCGTGCCACC
66	20nt,	3253	+/100.00%	0		74	#N/A	#N/A	#N/A				1428
67	20nt,	2834	+/100.00%	0		75	#N/A	#N/A	#N/A				CCGCACGAAATCGCGCCACC
68	20nt,	1871	+/100.00%	0		76	#N/A	#N/A	#N/A				1195
69	20nt,	1821	+/100.00%	0		77	#N/A	#N/A	#N/A				CCGCACGAAACCGTGCCACC
70	20nt,	1427	+/100.00%	0		78	#N/A	#N/A	#N/A				1092
71	20nt,	1259	+/100.00%	0		79	#N/A	#N/A	#N/A				CCGCACGAAATCGTGCCACT
72	20nt,	1022	+/100.00%	0		80	#N/A	#N/A	#N/A				1080
73	20nt,	1013	+/100.00%	0		81	#N/A	#N/A	#N/A				CCGCACGAAATCGTGCCTCC
74	20nt,	1012	+/100.00%	0		82	#N/A	#N/A	#N/A				1594
75	20nt,	1007	+/100.00%	0		83	#N/A	#N/A	#N/A				CCGCACGAAGTCGTGCCACC
76	20nt,	1028	+/100.00%	0		84	#N/A	#N/A	#N/A				3215
77	20nt,	2972	+/100.00%	0		85	#N/A	#N/A	#N/A				CCGCACGAGATCGTGCCACC
78	20nt,	1034	+/100.00%	0		86	#N/A	#N/A	#N/A				2613
79	20nt,	5485	+/100.00%	0		87	#N/A	#N/A	#N/A				CCGCACGAAATCTTGCCACC
80	20nt,	2835	+/100.00%	0		88	#N/A	#N/A	#N/A				2472
81	20nt,	1055	+/100.00%	0		89	#N/A	#N/A	#N/A				CCGCACGAAATCGTGCCGCC
82	20nt,	1078	+/100.00%	0		90	#N/A	#N/A	#N/A				1286
83	20nt,	1278	+/100.00%	0		91	#N/A	#N/A	#N/A				CCGCACGGAATCGTGCCACC
84	20nt,	1269	+/100.00%	0		92	#N/A	#N/A	#N/A				end
85	20nt,	1422	+/100.00%	0		93	#N/A	#N/A	#N/A
86	20nt,	2339	+/100.00%	0		94	#N/A	#N/A	#N/A
87	20nt,	1678	+/100.00%	0		95	#N/A	#N/A	#N/A
88	20nt,	2322	+/100.00%	0		96	#N/A	#N/A	#N/A
89	20nt,	1816	+/100.00%	0		97	#N/A	#N/A	#N/A
90	20nt,	2780	+/100.00%	0		98	#N/A	#N/A	#N/A
91	20nt,	1557	+/100.00%	0		99	#N/A	#N/A	#N/A
92	20nt,	3122	+/100.00%	0		100	#N/A	#N/A	#N/A
93	20nt,	1193	+/100.00%	0		101	#N/A	#N/A	#N/A
94	20nt,	2419	+/100.00%	0		102	#N/A	#N/A	#N/A
95	20nt,	1255	+/100.00%	0		103	#N/A	#N/A	#N/A
96	20nt,	1047	+/100.00%	0		104	#N/A	#N/A	#N/A
97	20nt,	1404	+/100.00%	0		105	#N/A	#N/A	#N/A
98	20nt,	2871	+/100.00%	0		106	#N/A	#N/A	#N/A
99	20nt,	2725	+/100.00%	0		107	#N/A	#N/A	#N/A
100	20nt,	1965	+/100.00%	0		108	#N/A	#N/A	#N/A
101	20nt,	1611	+/100.00%	0		109	#N/A	#N/A	#N/A
102	20nt,	1485	+/100.00%	0		110	#N/A	#N/A	#N/A
103	20nt,	1449	+/100.00%	0		111	#N/A	#N/A	#N/A
104	20nt,	1376	+/100.00%	0		112	#N/A	#N/A	#N/A
105	20nt,	1111	+/100.00%	0		113	#N/A	#N/A	#N/A
106	20nt,	1100	+/100.00%	0		114	#N/A	#N/A	#N/A
107	20nt,	1080	+/100.00%	0		115	#N/A	#N/A	#N/A
108	20nt,	1002	+/100.00%	0		116	#N/A	#N/A	#N/A
109	20nt,	1042	+/100.00%	0		117	#N/A	#N/A	#N/A
110	20nt,	1758	+/100.00%	0		118	#N/A	#N/A	#N/A
111	20nt,	2467	+/100.00%	0		119	#N/A	#N/A	#N/A
112	20nt,	11126	+/100.00%	0		120	#N/A	#N/A	#N/A
113	20nt,	3059	+/100.00%	0		121	#N/A	#N/A	#N/A
Cluster 4				4694	0.0961861	122	#N/A	#N/A	#N/A
0	20nt,	3000		0		123	#N/A	#N/A	#N/A
1	20nt,	1694	+/100.00%	0		124	#N/A	#N/A	#N/A
Cluster 5				1955	0.0400605	125	#N/A	#N/A	#N/A
0	20nt,	1955		0		126	#N/A	#N/A	#N/A
Cluster 6				1513	0.0310033	127	#N/A	#N/A	#N/A
0	20nt,	1513		0		128	#N/A	#N/A	#N/A
Cluster 7				1164	0.0238519	129	#N/A	#N/A	#N/A
0	20nt,	1164		0		130	#N/A	#N/A	#N/A
Cluster 8				7007	0.143582	131	#N/A	#N/A	#N/A
0	20nt,	4250		0		132	#N/A	#N/A	#N/A
1	20nt,	2757	+/100.00%	0		133	#N/A	#N/A	#N/A
Cluster 9				10139	0.207761	134	#N/A	#N/A	#N/A
0	20nt,	2969		0		135	#N/A	#N/A	#N/A
1	20nt,	2362	+/100.00%	0		136	#N/A	#N/A	#N/A
2	20nt,	2334	+/100.00%	0		137	#N/A	#N/A	#N/A
3	20nt,	1248	+/100.00%	0		138	#N/A	#N/A	#N/A
4	20nt,	1226	+/100.00%	0		139	#N/A	#N/A	#N/A
Cluster 10				451507	9.25196	140	#N/A	#N/A	#N/A
0	20nt,	13529		0		141	#N/A	#N/A	#N/A
1	20nt,	12573	+/100.00%	0		142	#N/A	#N/A	#N/A
2	20nt,	8183	+/100.00%	0		143	#N/A	#N/A	#N/A
3	20nt,	4908	+/100.00%	0		144	#N/A	#N/A	#N/A
4	20nt,	2429	+/100.00%	0		145	#N/A	#N/A	#N/A
5	20nt,	2215	+/100.00%	0		146	#N/A	#N/A	#N/A
6	20nt,	1079	+/100.00%	0		147	#N/A	#N/A	#N/A
7	20nt,	1343	+/100.00%	0		148	#N/A	#N/A	#N/A
8	20nt,	10015	+/100.00%	0		149	#N/A	#N/A	#N/A
9	20nt,	7681	+/100.00%	0		150	#N/A	#N/A	#N/A
10	20nt,	3891	+/100.00%	0		151	#N/A	#N/A	#N/A
11	20nt,	2068	+/100.00%	0		152	#N/A	#N/A	#N/A
12	20nt,	1848	+/100.00%	0		153	#N/A	#N/A	#N/A
13	20nt,	3290	+/100.00%	0		154	#N/A	#N/A	#N/A
14	20nt,	2698	+/100.00%	0		155	#N/A	#N/A	#N/A
15	20nt,	1461	+/100.00%	0		156	#N/A	#N/A	#N/A
16	20nt,	2237	+/100.00%	0		157	#N/A	#N/A	#N/A
17	20nt,	1631	+/100.00%	0		158	#N/A	#N/A	#N/A
18	20nt,	1484	+/100.00%	0		159	#N/A	#N/A	#N/A
19	20nt,	1351	+/100.00%	0		160	#N/A	#N/A	#N/A
20	20nt,	1200	+/100.00%	0		161	#N/A	#N/A	#N/A
21	20nt,	2093	+/100.00%	0		162	#N/A	#N/A	#N/A
22	20nt,	5076	+/100.00%	0		163	#N/A	#N/A	#N/A
23	20nt,	6224	+/100.00%	0		164	#N/A	#N/A	#N/A
24	20nt,	20017	+/100.00%	0		165	#N/A	#N/A	#N/A
25	20nt,	29139	+/100.00%	0		166	#N/A	#N/A	#N/A
26	20nt,	53021	+/100.00%	0		167	#N/A	#N/A	#N/A
27	20nt,	109155	+/100.00%	0		168	#N/A	#N/A	#N/A
28	20nt,	117506	+/100.00%	0		169	#N/A	#N/A	#N/A
29	20nt,	2421	+/100.00%	0		170	#N/A	#N/A	#N/A
30	20nt,	1960	+/100.00%	0		171	#N/A	#N/A	#N/A
31	20nt,	1432	+/100.00%	0		172	#N/A	#N/A	#N/A
32	20nt,	1274	+/100.00%	0		173	#N/A	#N/A	#N/A
33	20nt,	1226	+/100.00%	0		174	#N/A	#N/A	#N/A
34	20nt,	1205	+/100.00%	0		175	#N/A	#N/A	#N/A
35	20nt,	1091	+/100.00%	0		176	#N/A	#N/A	#N/A
36	20nt,	2164	+/100.00%	0		177	#N/A	#N/A	#N/A
37	20nt,	2012	+/100.00%	0		178	#N/A	#N/A	#N/A
38	20nt,	1152	+/100.00%	0		179	#N/A	#N/A	#N/A
39	20nt,	1491	+/100.00%	0		180	#N/A	#N/A	#N/A
40	20nt,	1465	+/100.00%	0		181	#N/A	#N/A	#N/A
41	20nt,	1214	+/100.00%	0		182	#N/A	#N/A	#N/A
42	20nt,	2055	+/100.00%	0		183	#N/A	#N/A	#N/A
Cluster 11				5702	0.116841	184	#N/A	#N/A	#N/A
0	20nt,	4052		0		185	#N/A	#N/A	#N/A
1	20nt,	1650	+/100.00%	0		186	#N/A	#N/A	#N/A
Cluster 12				121966	2.49924	187	#N/A	#N/A	#N/A
0	20nt,	2689		0		188	#N/A	#N/A	#N/A
1	20nt,	1025	+/100.00%	0		189	#N/A	#N/A	#N/A
2	20nt,	1176	+/100.00%	0		190	#N/A	#N/A	#N/A
3	20nt,	1122	+/100.00%	0		191	#N/A	#N/A	#N/A
4	20nt,	1138	+/100.00%	0		192	#N/A	#N/A	#N/A
5	20nt,	1014	+/100.00%	0		193	#N/A	#N/A	#N/A
6	20nt,	1205	+/100.00%	0		194	#N/A	#N/A	#N/A
7	20nt,	1187	+/100.00%	0		195	#N/A	#N/A	#N/A
8	20nt,	1013	+/100.00%	0		196	#N/A	#N/A	#N/A
9	20nt,	2374	+/100.00%	0		197	#N/A	#N/A	#N/A
10	20nt,	2331	+/100.00%	0		198	#N/A	#N/A	#N/A
11	20nt,	1854	+/100.00%	0		199	#N/A	#N/A	#N/A
12	20nt,	1559	+/100.00%	0		200	#N/A	#N/A	#N/A
13	20nt,	1762	+/100.00%	0
14	20nt,	1648	+/100.00%	0
15	20nt,	1440	+/100.00%	0
16	20nt,	1105	+/100.00%	0
17	20nt,	9612	+/100.00%	0
18	20nt,	9250	+/100.00%	0
19	20nt,	7313	+/100.00%	0
20	20nt,	6751	+/100.00%	0
21	20nt,	3327	+/100.00%	0
22	20nt,	2383	+/100.00%	0
23	20nt,	1496	+/100.00%	0
24	20nt,	1237	+/100.00%	0
25	20nt,	13526	+/100.00%	0
26	20nt,	13514	+/100.00%	0
27	20nt,	10729	+/100.00%	0
28	20nt,	6450	+/100.00%	0
29	20nt,	4859	+/100.00%	0
30	20nt,	2567	+/100.00%	0
31	20nt,	1171	+/100.00%	0
32	20nt,	1061	+/100.00%	0
33	20nt,	1078	+/100.00%	0
Cluster 13				12239	0.250793
0	20nt,	3672		0
1	20nt,	5441	+/100.00%	0
2	20nt,	3126	+/100.00%	0
Cluster 14				3012227	61.7244
0	20nt,	2383		0
1	20nt,	1010	+/100.00%	0
2	20nt,	2557	+/100.00%	0
3	20nt,	1744	+/100.00%	0
4	20nt,	1016	+/100.00%	0
5	20nt,	1282	+/100.00%	0
6	20nt,	1175	+/100.00%	0
7	20nt,	2665	+/100.00%	0
8	20nt,	1615	+/100.00%	0
9	20nt,	1055	+/100.00%	0
10	20nt,	8838	+/100.00%	0
11	20nt,	6402	+/100.00%	0
12	20nt,	2514	+/100.00%	0
13	20nt,	1026	+/100.00%	0
14	20nt,	5101	+/100.00%	0
15	20nt,	3470	+/100.00%	0
16	20nt,	1448	+/100.00%	0
17	20nt,	3804	+/100.00%	0
18	20nt,	3532	+/100.00%	0
19	20nt,	1557	+/100.00%	0
20	20nt,	2422	+/100.00%	0
21	20nt,	1762	+/100.00%	0
22	20nt,	1196	+/100.00%	0
23	20nt,	2023	+/100.00%	0
24	20nt,	1421	+/100.00%	0
25	20nt,	1206	+/100.00%	0
26	20nt,	6281	+/100.00%	0
27	20nt,	4515	+/100.00%	0
28	20nt,	3641	+/100.00%	0
29	20nt,	1922	+/100.00%	0
30	20nt,	1006	+/100.00%	0
31	20nt,	7499	+/100.00%	0
32	20nt,	5750	+/100.00%	0
33	20nt,	4143	+/100.00%	0
34	20nt,	2179	+/100.00%	0
35	20nt,	1117	+/100.00%	0
36	20nt,	1117	+/100.00%	0
37	20nt,	3483	+/100.00%	0
38	20nt,	2257	+/100.00%	0
39	20nt,	2430	+/100.00%	0
40	20nt,	1242	+/100.00%	0
41	20nt,	2709	+/100.00%	0
42	20nt,	2198	+/100.00%	0
43	20nt,	1547	+/100.00%	0
44	20nt,	4120	+/100.00%	0
45	20nt,	2996	+/100.00%	0
46	20nt,	1322	+/100.00%	0
47	20nt,	2208	+/100.00%	0
48	20nt,	2253	+/100.00%	0
49	20nt,	1131	+/100.00%	0
50	20nt,	1378	+/100.00%	0
51	20nt,	1028	+/100.00%	0
52	20nt,	1077	+/100.00%	0
53	20nt,	1693	+/100.00%	0
54	20nt,	3452	+/100.00%	0
55	20nt,	1978	+/100.00%	0
56	20nt,	6545	+/100.00%	0
57	20nt,	3555	+/100.00%	0
58	20nt,	1078	+/100.00%	0
59	20nt,	4598	+/100.00%	0
60	20nt,	2927	+/100.00%	0
61	20nt,	4313	+/100.00%	0
62	20nt,	2582	+/100.00%	0
63	20nt,	3538	+/100.00%	0
64	20nt,	2262	+/100.00%	0
65	20nt,	1467	+/100.00%	0
66	20nt,	15694	+/100.00%	0
67	20nt,	9530	+/100.00%	0
68	20nt,	2690	+/100.00%	0
69	20nt,	1067	+/100.00%	0
70	20nt,	3145	+/100.00%	0
71	20nt,	2930	+/100.00%	0
72	20nt,	1878	+/100.00%	0
73	20nt,	1069	+/100.00%	0
74	20nt,	4433	+/100.00%	0
75	20nt,	2691	+/100.00%	0
76	20nt,	2849	+/100.00%	0
77	20nt,	1764	+/100.00%	0
78	20nt,	3576	+/100.00%	0
79	20nt,	2137	+/100.00%	0
80	20nt,	1818	+/100.00%	0
81	20nt,	1116	+/100.00%	0
82	20nt,	1760	+/100.00%	0
83	20nt,	1142	+/100.00%	0
84	20nt,	1635	+/100.00%	0
85	20nt,	1343	+/100.00%	0
86	20nt,	3780	+/100.00%	0
87	20nt,	31121	+/100.00%	0
88	20nt,	28619	+/100.00%	0
89	20nt,	9390	+/100.00%	0
90	20nt,	4247	+/100.00%	0
91	20nt,	1334	+/100.00%	0
92	20nt,	2258	+/100.00%	0
93	20nt,	1079	+/100.00%	0
94	20nt,	5826	+/100.00%	0
95	20nt,	3868	+/100.00%	0
96	20nt,	1082	+/100.00%	0
97	20nt,	2004	+/100.00%	0
98	20nt,	1977	+/100.00%	0
99	20nt,	1283	+/100.00%	0
100	20nt,	2451	+/100.00%	0
101	20nt,	1370	+/100.00%	0
102	20nt,	5705	+/100.00%	0
103	20nt,	3456	+/100.00%	0
104	20nt,	2028	+/100.00%	0
105	20nt,	1228	+/100.00%	0
106	20nt,	5723	+/100.00%	0
107	20nt,	3542	+/100.00%	0
108	20nt,	11257	+/100.00%	0
109	20nt,	7087	+/100.00%	0
110	20nt,	1709	+/100.00%	0
111	20nt,	1738	+/100.00%	0
112	20nt,	1609	+/100.00%	0
113	20nt,	1074	+/100.00%	0
114	20nt,	2206	+/100.00%	0
115	20nt,	1639	+/100.00%	0
116	20nt,	1818	+/100.00%	0
117	20nt,	1045	+/100.00%	0
118	20nt,	1008	+/100.00%	0
119	20nt,	1175	+/100.00%	0
120	20nt,	1087	+/100.00%	0
121	20nt,	1302	+/100.00%	0
122	20nt,	1244	+/100.00%	0
123	20nt,	1199	+/100.00%	0
124	20nt,	1163	+/100.00%	0
125	20nt,	1385	+/100.00%	0
126	20nt,	3046	+/100.00%	0
127	20nt,	4754	+/100.00%	0
128	20nt,	3077	+/100.00%	0
129	20nt,	2602	+/100.00%	0
130	20nt,	2482	+/100.00%	0
131	20nt,	1708	+/100.00%	0
132	20nt,	1511	+/100.00%	0
133	20nt,	1127	+/100.00%	0
134	20nt,	14108	+/100.00%	0
135	20nt,	4954	+/100.00%	0
136	20nt,	1507	+/100.00%	0
137	20nt,	14839	+/100.00%	0
138	20nt,	8139	+/100.00%	0
139	20nt,	2041	+/100.00%	0
140	20nt,	3895	+/100.00%	0
141	20nt,	3569	+/100.00%	0
142	20nt,	2111	+/100.00%	0
143	20nt,	1188	+/100.00%	0
144	20nt,	9328	+/100.00%	0
145	20nt,	8158	+/100.00%	0
146	20nt,	5917	+/100.00%	0
147	20nt,	3511	+/100.00%	0
148	20nt,	1630	+/100.00%	0
149	20nt,	2297	+/100.00%	0
150	20nt,	2149	+/100.00%	0
151	20nt,	1454	+/100.00%	0
152	20nt,	1745	+/100.00%	0
153	20nt,	3322	+/100.00%	0
154	20nt,	6978	+/100.00%	0
155	20nt,	15397	+/100.00%	0
156	20nt,	34862	+/100.00%	0
157	20nt,	12108	+/100.00%	0
158	20nt,	7981	+/100.00%	0
159	20nt,	2977	+/100.00%	0
160	20nt,	1171	+/100.00%	0
161	20nt,	1032	+/100.00%	0
162	20nt,	1343	+/100.00%	0
163	20nt,	1375	+/100.00%	0
164	20nt,	99715	+/100.00%	0
165	20nt,	95824	+/100.00%	0
166	20nt,	61925	+/100.00%	0
167	20nt,	12218	+/100.00%	0
168	20nt,	1478	+/100.00%	0
169	20nt,	2872	+/100.00%	0
170	20nt,	1725	+/100.00%	0
171	20nt,	3778	+/100.00%	0
172	20nt,	2244	+/100.00%	0
173	20nt,	1595	+/100.00%	0
174	20nt,	4538	+/100.00%	0
175	20nt,	2764	+/100.00%	0
176	20nt,	2896	+/100.00%	0
177	20nt,	1843	+/100.00%	0
178	20nt,	2324	+/100.00%	0
179	20nt,	1434	+/100.00%	0
180	20nt,	1639	+/100.00%	0
181	20nt,	1213	+/100.00%	0
182	20nt,	1196	+/100.00%	0
183	20nt,	1218	+/100.00%	0
184	20nt,	1182	+/100.00%	0
185	20nt,	2139	+/100.00%	0
186	20nt,	1488	+/100.00%	0
187	20nt,	1791	+/100.00%	0
188	20nt,	2737	+/100.00%	0
189	20nt,	1665	+/100.00%	0
190	20nt,	1447	+/100.00%	0
191	20nt,	1442	+/100.00%	0
192	20nt,	1066	+/100.00%	0
193	20nt,	1828	+/100.00%	0
194	20nt,	1518	+/100.00%	0
195	20nt,	1505	+/100.00%	0
196	20nt,	2230	+/100.00%	0
197	20nt,	1851	+/100.00%	0
198	20nt,	1553	+/100.00%	0
199	20nt,	1539	+/100.00%	0
200	20nt,	1514	+/100.00%	0
201	20nt,	1461	+/100.00%	0
202	20nt,	1296	+/100.00%	0
203	20nt,	1171	+/100.00%	0
204	20nt,	1085	+/100.00%	0
205	20nt,	1970	+/100.00%	0
206	20nt,	1802	+/100.00%	0
207	20nt,	1800	+/100.00%	0
208	20nt,	1619	+/100.00%	0
209	20nt,	1573	+/100.00%	0
210	20nt,	1559	+/100.00%	0
211	20nt,	1518	+/100.00%	0
212	20nt,	1511	+/100.00%	0
213	20nt,	1477	+/100.00%	0
214	20nt,	1475	+/100.00%	0
215	20nt,	1393	+/100.00%	0
216	20nt,	1358	+/100.00%	0
217	20nt,	1357	+/100.00%	0
218	20nt,	1357	+/100.00%	0
219	20nt,	1349	+/100.00%	0
220	20nt,	1333	+/100.00%	0
221	20nt,	1319	+/100.00%	0
222	20nt,	1298	+/100.00%	0
223	20nt,	1294	+/100.00%	0
224	20nt,	1283	+/100.00%	0
225	20nt,	1261	+/100.00%	0
226	20nt,	1246	+/100.00%	0
227	20nt,	1189	+/100.00%	0
228	20nt,	1189	+/100.00%	0
229	20nt,	1187	+/100.00%	0
230	20nt,	1179	+/100.00%	0
231	20nt,	1175	+/100.00%	0
232	20nt,	1159	+/100.00%	0
233	20nt,	1132	+/100.00%	0
234	20nt,	1097	+/100.00%	0
235	20nt,	1089	+/100.00%	0
236	20nt,	1084	+/100.00%	0
237	20nt,	1056	+/100.00%	0
238	20nt,	1044	+/100.00%	0
239	20nt,	1023	+/100.00%	0
240	20nt,	1001	+/100.00%	0
241	20nt,	3291	+/100.00%	0
242	20nt,	1375	+/100.00%	0
243	20nt,	1299	+/100.00%	0
244	20nt,	1131	+/100.00%	0
245	20nt,	1803	+/100.00%	0
246	20nt,	1313	+/100.00%	0
247	20nt,	3617	+/100.00%	0
248	20nt,	1998	+/100.00%	0
249	20nt,	8094	+/100.00%	0
250	20nt,	2953	+/100.00%	0
251	20nt,	4140	+/100.00%	0
252	20nt,	1770	+/100.00%	0
253	20nt,	5003	+/100.00%	0
254	20nt,	3186	+/100.00%	0
255	20nt,	3010	+/100.00%	0
256	20nt,	1742	+/100.00%	0
257	20nt,	2729	+/100.00%	0
258	20nt,	1454	+/100.00%	0
259	20nt,	3006	+/100.00%	0
260	20nt,	1983	+/100.00%	0
261	20nt,	3928	+/100.00%	0
262	20nt,	1896	+/100.00%	0
263	20nt,	1931	+/100.00%	0
264	20nt,	1080	+/100.00%	0
265	20nt,	1849	+/100.00%	0
266	20nt,	1073	+/100.00%	0
267	20nt,	1825	+/100.00%	0
268	20nt,	1016	+/100.00%	0
269	20nt,	5672	+/100.00%	0
270	20nt,	3338	+/100.00%	0
271	20nt,	4956	+/100.00%	0
272	20nt,	2737	+/100.00%	0
273	20nt,	4120	+/100.00%	0
274	20nt,	2380	+/100.00%	0
275	20nt,	3611	+/100.00%	0
276	20nt,	2149	+/100.00%	0
277	20nt,	3560	+/100.00%	0
278	20nt,	2054	+/100.00%	0
279	20nt,	3286	+/100.00%	0
280	20nt,	1912	+/100.00%	0
281	20nt,	3251	+/100.00%	0
282	20nt,	1784	+/100.00%	0
283	20nt,	3191	+/100.00%	0
284	20nt,	1912	+/100.00%	0
285	20nt,	2844	+/100.00%	0
286	20nt,	1737	+/100.00%	0
287	20nt,	2809	+/100.00%	0
288	20nt,	1540	+/100.00%	0
289	20nt,	2774	+/100.00%	0
290	20nt,	1604	+/100.00%	0
291	20nt,	2585	+/100.00%	0
292	20nt,	1600	+/100.00%	0
293	20nt,	1707	+/100.00%	0
294	20nt,	1099	+/100.00%	0
295	20nt,	2126	+/100.00%	0
296	20nt,	1294	+/100.00%	0
297	20nt,	1997	+/100.00%	0
298	20nt,	1171	+/100.00%	0
299	20nt,	2778	+/100.00%	0
300	20nt,	1886	+/100.00%	0
301	20nt,	2371	+/100.00%	0
302	20nt,	1359	+/100.00%	0
303	20nt,	2200	+/100.00%	0
304	20nt,	1136	+/100.00%	0
305	20nt,	2027	+/100.00%	0
306	20nt,	1119	+/100.00%	0
307	20nt,	3904	+/100.00%	0
308	20nt,	2457	+/100.00%	0
309	20nt,	1112	+/100.00%	0
310	20nt,	5398	+/100.00%	0
311	20nt,	3158	+/100.00%	0
312	20nt,	1233	+/100.00%	0
313	20nt,	5853	+/100.00%	0
314	20nt,	3628	+/100.00%	0
315	20nt,	1000	+/100.00%	0
316	20nt,	8753	+/100.00%	0
317	20nt,	5063	+/100.00%	0
318	20nt,	1397	+/100.00%	0
319	20nt,	1036	+/100.00%	0
320	20nt,	1017	+/100.00%	0
321	20nt,	9201	+/100.00%	0
322	20nt,	7804	+/100.00%	0
323	20nt,	2623	+/100.00%	0
324	20nt,	1074	+/100.00%	0
325	20nt,	3484	+/100.00%	0
326	20nt,	2267	+/100.00%	0
327	20nt,	1028	+/100.00%	0
328	20nt,	8647	+/100.00%	0
329	20nt,	5538	+/100.00%	0
330	20nt,	1595	+/100.00%	0
331	20nt,	3125	+/100.00%	0
332	20nt,	2112	+/100.00%	0
333	20nt,	1123	+/100.00%	0
334	20nt,	1714	+/100.00%	0
335	20nt,	2844	+/100.00%	0
336	20nt,	3255	+/100.00%	0
337	20nt,	3970	+/100.00%	0
338	20nt,	4498	+/100.00%	0
339	20nt,	10010	+/100.00%	0
340	20nt,	13694	+/100.00%	0
341	20nt,	41474	+/100.00%	0
342	20nt,	108437	+/100.00%	0
343	20nt,	383743	+/100.00%	0
344	20nt,	636222	+/100.00%	0
345	20nt,	7563	+/100.00%	0
346	20nt,	5724	+/100.00%	0
347	20nt,	4246	+/100.00%	0
348	20nt,	2631	+/100.00%	0
349	20nt,	2327	+/100.00%	0
350	20nt,	1988	+/100.00%	0
351	20nt,	1736	+/100.00%	0
352	20nt,	1675	+/100.00%	0
353	20nt,	1659	+/100.00%	0
354	20nt,	1635	+/100.00%	0
355	20nt,	1614	+/100.00%	0
356	20nt,	1549	+/100.00%	0
357	20nt,	1313	+/100.00%	0
358	20nt,	1103	+/100.00%	0
359	20nt,	1057	+/100.00%	0
360	20nt,	1171	+/100.00%	0
361	20nt,	1073	+/100.00%	0
362	20nt,	1152	+/100.00%	0
363	20nt,	2779	+/100.00%	0
364	20nt,	4073	+/100.00%	0
365	20nt,	1029	+/100.00%	0
366	20nt,	1924	+/100.00%	0
367	20nt,	1441	+/100.00%	0
368	20nt,	1044	+/100.00%	0
369	20nt,	1650	+/100.00%	0
370	20nt,	9767	+/100.00%	0
371	20nt,	55040	+/100.00%	0
372	20nt,	1627	+/100.00%	0
373	20nt,	2145	+/100.00%	0
374	20nt,	1082	+/100.00%	0
375	20nt,	1074	+/100.00%	0
376	20nt,	2812	+/100.00%	0
377	20nt,	2641	+/100.00%	0
378	20nt,	2489	+/100.00%	0
379	20nt,	2197	+/100.00%	0
380	20nt,	1830	+/100.00%	0
381	20nt,	1343	+/100.00%	0
382	20nt,	1243	+/100.00%	0
383	20nt,	1703	+/100.00%	0
384	20nt,	1702	+/100.00%	0
385	20nt,	1043	+/100.00%	0
386	20nt,	1008	+/100.00%	0
387	20nt,	2020	+/100.00%	0
388	20nt,	6308	+/100.00%	0
389	20nt,	1053	+/100.00%	0
390	20nt,	1064	+/100.00%	0
391	20nt,	6709	+/100.00%	0
392	20nt,	1026	+/100.00%	0
393	20nt,	1044	+/100.00%	0
394	20nt,	4400	+/100.00%	0
395	20nt,	1350	+/100.00%	0
396	20nt,	1445	+/100.00%	0
397	20nt,	1067	+/100.00%	0
398	20nt,	1333	+/100.00%	0
399	20nt,	1004	+/100.00%	0
400	20nt,	2136	+/100.00%	0
401	20nt,	4134	+/100.00%	0
402	20nt,	2675	+/100.00%	0
403	20nt,	2209	+/100.00%	0
404	20nt,	1144	+/100.00%	0
405	20nt,	6095	+/100.00%	0
406	20nt,	4359	+/100.00%	0
407	20nt,	3542	+/100.00%	0
408	20nt,	2048	+/100.00%	0
409	20nt,	1064	+/100.00%	0
410	20nt,	32084	+/100.00%	0
411	20nt,	28930	+/100.00%	0
412	20nt,	17266	+/100.00%	0
413	20nt,	8709	+/100.00%	0
414	20nt,	3943	+/100.00%	0
415	20nt,	3788	+/100.00%	0
416	20nt,	1302	+/100.00%	0
417	20nt,	50757	+/100.00%	0
418	20nt,	43353	+/100.00%	0
419	20nt,	31173	+/100.00%	0
420	20nt,	17632	+/100.00%	0
421	20nt,	8839	+/100.00%	0
422	20nt,	3645	+/100.00%	0
423	20nt,	2966	+/100.00%	0
424	20nt,	1114	+/100.00%	0
425	20nt,	14921	+/100.00%	0
426	20nt,	13553	+/100.00%	0
427	20nt,	6146	+/100.00%	0
428	20nt,	2568	+/100.00%	0
429	20nt,	1018	+/100.00%	0
430	20nt,	14872	+/100.00%	0
431	20nt,	10334	+/100.00%	0
432	20nt,	3827	+/100.00%	0
433	20nt,	1491	+/100.00%	0
434	20nt,	3111	+/100.00%	0
435	20nt,	2629	+/100.00%	0
436	20nt,	1416	+/100.00%	0
437	20nt,	2569	+/100.00%	0
438	20nt,	2167	+/100.00%	0
439	20nt,	1072	+/100.00%	0
440	20nt,	2784	+/100.00%	0
441	20nt,	2277	+/100.00%	0
442	20nt,	2143	+/100.00%	0
443	20nt,	1363	+/100.00%	0
444	20nt,	2413	+/100.00%	0
445	20nt,	1019	+/100.00%	0
Cluster 15				100823	2.06599
0	20nt,	14392		0
1	20nt,	1380	+/100.00%	0
2	20nt,	1044	+/100.00%	0
3	20nt,	20566	+/100.00%	0
4	20nt,	1043	+/100.00%	0
5	20nt,	2117	+/100.00%	0
6	20nt,	1489	+/100.00%	0
7	20nt,	4285	+/100.00%	0
8	20nt,	2257	+/100.00%	0
9	20nt,	5969	+/100.00%	0
10	20nt,	5387	+/100.00%	0
11	20nt,	3230	+/100.00%	0
12	20nt,	1646	+/100.00%	0
13	20nt,	1908	+/100.00%	0
14	20nt,	1263	+/100.00%	0
15	20nt,	1234	+/100.00%	0
16	20nt,	10318	+/100.00%	0
17	20nt,	10189	+/100.00%	0
18	20nt,	4441	+/100.00%	0
19	20nt,	1709	+/100.00%	0
20	20nt,	1026	+/100.00%	0
21	20nt,	1267	+/100.00%	0
22	20nt,	1434	+/100.00%	0
23	20nt,	1229	+/100.00%	0
Cluster 16				40796	0.835962
0	20nt,	7675		0
1	20nt,	2331	+/100.00%	0
2	20nt,	2202	+/100.00%	0
3	20nt,	1139	+/100.00%	0
4	20nt,	1343	+/100.00%	0
5	20nt,	3157	+/100.00%	0
6	20nt,	1904	+/100.00%	0
7	20nt,	1077	+/100.00%	0
8	20nt,	7895	+/100.00%	0
9	20nt,	6107	+/100.00%	0
10	20nt,	4026	+/100.00%	0
11	20nt,	1940	+/100.00%	0
Cluster 17				12397	0.25403
0	20nt,	1536		0
1	20nt,	2985	+/100.00%	0
2	20nt,	1892	+/100.00%	0
3	20nt,	1476	+/100.00%	0
4	20nt,	1815	+/100.00%	0
5	20nt,	1671	+/100.00%	0
6	20nt,	1022	+/100.00%	0
Cluster 18				21494	0.44044
0	20nt,	7484		0
1	20nt,	3113	+/100.00%	0
2	20nt,	1236	+/100.00%	0
3	20nt,	3360	+/100.00%	0
4	20nt,	1085	+/100.00%	0
5	20nt,	1227	+/100.00%	0
6	20nt,	1652	+/100.00%	0
7	20nt,	1295	+/100.00%	0
8	20nt,	1042	+/100.00%	0
Cluster 19				2086	0.0427448
0	20nt,	1051		0
1	20nt,	1035	+/100.00%	0
Cluster 20				1195	0.0244871
0	20nt,	1195		0
Cluster 21				2071	0.0424374
0	20nt,	2071		0
Cluster 22				1102	0.0225814
0	20nt,	1102		0
Cluster 23				1108	0.0227043
0	20nt,	1108		0
Cluster 24				1310	0.0268436
0	20nt,	1310		0
Cluster 25				490345	10.0478
0	20nt,	1306		0
1	20nt,	1110	+/100.00%	0
2	20nt,	2078	+/100.00%	0
3	20nt,	2057	+/100.00%	0
4	20nt,	1336	+/100.00%	0
5	20nt,	4882	+/100.00%	0
6	20nt,	3022	+/100.00%	0
7	20nt,	1194	+/100.00%	0
8	20nt,	1061	+/100.00%	0
9	20nt,	1326	+/100.00%	0
10	20nt,	1225	+/100.00%	0
11	20nt,	1208	+/100.00%	0
12	20nt,	1122	+/100.00%	0
13	20nt,	1184	+/100.00%	0
14	20nt,	1171	+/100.00%	0
15	20nt,	1054	+/100.00%	0
16	20nt,	1048	+/100.00%	0
17	20nt,	1038	+/100.00%	0
18	20nt,	1037	+/100.00%	0
19	20nt,	2267	+/100.00%	0
20	20nt,	2147	+/100.00%	0
21	20nt,	1530	+/100.00%	0
22	20nt,	2164	+/100.00%	0
23	20nt,	2139	+/100.00%	0
24	20nt,	1584	+/100.00%	0
25	20nt,	1986	+/100.00%	0
26	20nt,	1775	+/100.00%	0
27	20nt,	1588	+/100.00%	0
28	20nt,	1613	+/100.00%	0
29	20nt,	1531	+/100.00%	0
30	20nt,	1154	+/100.00%	0
31	20nt,	1878	+/100.00%	0
32	20nt,	1619	+/100.00%	0
33	20nt,	1460	+/100.00%	0
34	20nt,	1106	+/100.00%	0
35	20nt,	3549	+/100.00%	0
36	20nt,	3362	+/100.00%	0
37	20nt,	2154	+/100.00%	0
38	20nt,	1164	+/100.00%	0
39	20nt,	4497	+/100.00%	0
40	20nt,	3583	+/100.00%	0
41	20nt,	3537	+/100.00%	0
42	20nt,	2390	+/100.00%	0
43	20nt,	1102	+/100.00%	0
44	20nt,	1458	+/100.00%	0
45	20nt,	3179	+/100.00%	0
46	20nt,	7274	+/100.00%	0
47	20nt,	17664	+/100.00%	0
48	20nt,	41901	+/100.00%	0
49	20nt,	1141	+/100.00%	0
50	20nt,	8084	+/100.00%	0
51	20nt,	6047	+/100.00%	0
52	20nt,	2674	+/100.00%	0
53	20nt,	1115	+/100.00%	0
54	20nt,	1198	+/100.00%	0
55	20nt,	1009	+/100.00%	0
56	20nt,	1562	+/100.00%	0
57	20nt,	1648	+/100.00%	0
58	20nt,	104895	+/100.00%	0
59	20nt,	103777	+/100.00%	0
60	20nt,	73783	+/100.00%	0
61	20nt,	24753	+/100.00%	0
62	20nt,	4845	+/100.00%	0
Cluster 26				9171	0.187926
0	20nt,	1091		0
1	20nt,	2560	+/100.00%	0
2	20nt,	2505	+/100.00%	0
3	20nt,	1908	+/100.00%	0
4	20nt,	1107	+/100.00%	0
Cluster 27				1608	0.03295
0	20nt,	1608		0
Cluster 28				24116	0.494168
0	20nt,	10771		0
1	20nt,	6611	+/100.00%	0
2	20nt,	1917	+/100.00%	0
3	20nt,	1861	+/100.00%	0
4	20nt,	1693	+/100.00%	0
5	20nt,	1263	+/100.00%	0
Cluster 29				1452	0.0297533
0	20nt,	1452		0
Cluster 30				1428	0.0292616
0	20nt,	1428		0
Cluster 31				1195	0.0244871
0	20nt,	1195		0
Cluster 32				1092	0.0223765
0	20nt,	1092		0
Cluster 33				1080	0.0221306
0	20nt,	1080		0
Cluster 34				1594	0.0326631
0	20nt,	1594		0
Cluster 35				5030	0.103071
0	20nt,	3215		0
1	20nt,	1815	+/100.00%	0
Cluster 36				3906	0.0800389
0	20nt,	2613		0
1	20nt,	1293	+/100.00%	0
Cluster 37				3972	0.0813914
0	20nt,	2472		0
1	20nt,	1500	+/100.00%	0
Cluster 38				1286	0.0263518
0	20nt,	1286		0
Cluster 39				5757	0.117968
0	19nt,	5757		0
Cluster 40				1707	0.0349786
0	19nt,	1707		0
Cluster 41				3777	0.0773956
0	19nt,	1781		0
1	19nt,	1996	+/100.00%	0
Cluster 42				80840	1.65652
0	19nt,	1398		0
1	19nt,	1143	+/100.00%	0
2	19nt,	15511	+/100.00%	0
3	19nt,	3619	+/100.00%	0
4	19nt,	1568	+/100.00%	0
5	19nt,	1450	+/100.00%	0
6	19nt,	1111	+/100.00%	0
7	19nt,	2065	+/100.00%	0
8	19nt,	1812	+/100.00%	0
9	19nt,	1644	+/100.00%	0
10	19nt,	1821	+/100.00%	0
11	19nt,	4566	+/100.00%	0
12	19nt,	3886	+/100.00%	0
13	19nt,	3123	+/100.00%	0
14	19nt,	1645	+/100.00%	0
15	19nt,	3668	+/100.00%	0
16	19nt,	12198	+/100.00%	0
17	19nt,	15958	+/100.00%	0
18	19nt,	1370	+/100.00%	0
19	19nt,	1284	+/100.00%	0
Cluster 43				12351	0.253088
0	19nt,	3872		0
1	19nt,	2819	+/100.00%	0
2	19nt,	2443	+/100.00%	0
3	19nt,	2000	+/100.00%	0
4	19nt,	1217	+/100.00%	0
Cluster 44				13750	0.281755
0	19nt,	4055		0
1	19nt,	3335	+/100.00%	0
2	19nt,	3270	+/100.00%	0
3	19nt,	2084	+/100.00%	0
4	19nt,	1006	+/100.00%	0
Cluster 45				62402	1.2787
0	18nt,	1032		0
1	18nt,	1164	+/100.00%	0
2	18nt,	10612	+/100.00%	0
3	18nt,	10093	+/100.00%	0
4	18nt,	8558	+/100.00%	0
5	18nt,	6888	+/100.00%	0
6	18nt,	4277	+/100.00%	0
7	18nt,	4239	+/100.00%	0
8	18nt,	2792	+/100.00%	0
9	18nt,	1701	+/100.00%	0
10	18nt,	2694	+/100.00%	0
11	18nt,	2595	+/100.00%	0
12	18nt,	2271	+/100.00%	0
13	18nt,	2266	+/100.00%	0
14	18nt,	1220	+/100.00%	0
Cluster 46				2337	0.0478881
0	15nt,	2337		0
Cluster 47

## Sheet: R16
Cluster	0			44	0.0295554	Cluster % Total	Reads
0	20nt,	15				100	148873															15		15	CACCTGGGCATCGCTCCACC
1	20nt,	16	+/100.00%			Cluster	Representation	Representative	Sequence	Alt Sequence 1	Alt Sequence 2	Alt Sequence 3										CACCTGGGCATCGCTCCACC		17	CCGCACTAATAGTGCCAAC
2	20nt,	13	+/100.00%			0	0.0295554	15	CACCTGGGCATCGCTCCACC	CCGCACTGACAGTGCCAAC	CCGCACGAAATCGTTCCACC	CCGCACATATGTGCCACC	AATGTGCCACC	CCGCACGAACC	CCGCACACAGTGTGCCACC	CCGCACAGACTGTGCCACC						17		66	CCGCACTGAACAGTGCCAAC
Cluster	1			193	0.129641	1	0.129641	66	CCGCACTGAACAGTGCCAAC													CCGCACTAATAGTGCCAAC		15	CCGCACTGACAGTGCCAAC
0	20nt,	66				2	0.552148	14	CCGCACTAAATAGTGCCAAC	CCGCACGAAATCGTGCCAAC	CCGCCCGAAATCGTGCCACC	CCGCACGAAGTCGTGCCACC	CCGCACAAATCGTGCCACC	CCGCACGTATCGTGCCACC	CCGCACGAACCGTGCCACC	CCGCACAGATGTGCCACC	CCGCACGAATTGTGCCACC					66		14	CCGCACTAAATAGTGCCAAC
1	20nt,	28	+/100.00%			3	41.0403	11	CCGCACGAAATCGTGCCACC	CCGCACGAATCGTGCCACT	CCGCACTAATCGTGCCACC	CCGCACGAAACCGTGCCACC	CCGCACGATTCGTGCCACC									CCGCACTGAACAGTGCCAAC		13	CCGCACAAATGTGCCACC
2	20nt,	12	+/100.00%			4	0.0261968	29	CCGCACGAAATCGTGCCACA	CCGCACGAAATCGAGCCACC												15		11	CCGCACGAAATCGTGCCACC
3	20nt,	13	+/100.00%			5	0.0241817	26	CCGCACGAAATCGTGCCACT	CCGCACGGAATCGTGCCACC	CCGCACGAAATCGTGCCTCC	CCGCACGAAATCGTGCCGCC	CCGCACGACTCGTGCCACC									CCGCACTGACAGTGCCAAC		13	CCGCACGAATCGTGCCACC
4	20nt,	14	+/100.00%			6	0.0147777	22	CCGCACGAAATCTTGCCACC	CCGCACGAAATCGTACCACC	CCGCACGAAATCGCGCCACC	CCGCACACAAGTGTGCCACC										14		29	CCGCACGAAATCGTGCCACA
5	20nt,	18	+/100.00%			7	0.0322422	31	CCGCACGAAATCATGCCACC													CCGCACTAAATAGTGCCAAC		26	CCGCACGAAATCGTGCCACT
6	20nt,	16	+/100.00%			8	0.926293	14	CCGCACTAAATAGTGCCAAC	CCGCACGAAATCGTGCCAAC	CCGCCCGAAATCGTGCCACC	CCGCACGAAGTCGTGCCACC	CCGCACAAATCGTGCCACC	CCGCACGTATCGTGCCACC	CCGCACGAACCGTGCCACC	CCGCACAGATGTGCCACC	CCGCACGAATTGTGCCACC					13		11	CCGCACGAATCGTGCCACT
7	20nt,	14	+/100.00%			9	0.0208231	21	CCGCACGAAATCGTGCCATC	CCGCACGAGTCGTGCCACC												CCGCACAAATGTGCCACC		22	CCGCACGAAATCTTGCCACC
8	20nt,	12	+/100.00%			10	0.0100757	15	CACCTGGGCATCGCTCCACC	CCGCACTGACAGTGCCAAC	CCGCACGAAATCGTTCCACC	CCGCACATATGTGCCACC	AATGTGCCACC	CCGCACGAACC	CCGCACACAGTGTGCCACC	CCGCACAGACTGTGCCACC						11		31	CCGCACGAAATCATGCCACC
Cluster	2			822	0.552148	11	0.0147777	22	CCGCACGAAATCTTGCCACC	CCGCACGAAATCGTACCACC	CCGCACGAAATCGCGCCACC	CCGCACACAAGTGTGCCACC										CCGCACGAAATCGTGCCACC		10	CCGCACGAATCATGCCACC
0	20nt,	14				12	0.037616	40	CCGCACGAAATCGTGCTACC													13		14	CCGCACGAAATCGTGCCAAC
1	20nt,	71	+/100.00%			13	0.0114191	17	CCGCACTAATAGTGCCAAC	CCGCACGAAATCGTGTCACC	CCGCACGAAAACGTGCCACC	CCGCACGAATCGCGCCACC	CCGCACGGATCGTGCCACC	CCGCACGAACTCGTGCCACC	CCGCACGATGTGCCACC							CCGCACGAATCGTGCCACC		21	CCGCACGAAATCGTGCCATC
2	20nt,	44	+/100.00%			14	0.00806056	12	CCGCATGAAATCGTGCCACC	CCGCACAGAATCGTGCCACC	CCGCACGAATCGAGCCACC	CCGCACGAATCGTGCCTCC	CCGCCCGAATCGTGCCACC	CCGCACAAATGTGCCGCC	CCGCACAAATGTGCCTCC	CCGCACAAATTGTGCCAAC	CCGCACGAATCGTGCCATC	ACGAATCGTGCCACC	CCGCACGAAGTGTGCCACC	CCGCACGAACTGTGCCACC		29		15	CCGCACGAAATCGTTCCACC
3	20nt,	13	+/100.00%			15	0.00671713	10	CCGCACGAATCATGCCACC	CCGCACGAAAGCGTGCCACC	CCGCACGAAACGTGCCACC	CCGCACAAATGTGCTACC	CCGCACAAAAGTGCCACC	CCGCACTAATGTGCCACC	CCGCACAATGTGCCACC	CCGCACGAAATAGTGCCACC	CCGCACGAATGGAACC	CCGCACGAATCGTGCCAAC	CCGCACAGAACTGTGCCAAC	ATCGTGCCATC	CCGCACAGAACTGCGCCACC	CCGCACGAAATCGTGCCACA		22	CCGCACGAAATCGTACCACC
4	20nt,	11	+/100.00%			16	0.0261968	12	CCGCATGAAATCGTGCCACC	CCGCACAGAATCGTGCCACC	CCGCACGAATCGAGCCACC	CCGCACGAATCGTGCCTCC	CCGCCCGAATCGTGCCACC	CCGCACAAATGTGCCGCC	CCGCACAAATGTGCCTCC	CCGCACAAATTGTGCCAAC	CCGCACGAATCGTGCCATC	ACGAATCGTGCCACC	CCGCACGAAGTGTGCCACC	CCGCACGAACTGTGCCACC		26		40	CCGCACGAAATCGTGCTACC
5	20nt,	111	+/100.00%			17	0.0181363	14	CCGCACTAAATAGTGCCAAC	CCGCACGAAATCGTGCCAAC	CCGCCCGAAATCGTGCCACC	CCGCACGAAGTCGTGCCACC	CCGCACAAATCGTGCCACC	CCGCACGTATCGTGCCACC	CCGCACGAACCGTGCCACC	CCGCACAGATGTGCCACC	CCGCACGAATTGTGCCACC					CCGCACGAAATCGTGCCACT		17	CCGCACGAAATCGTGTCACC
6	20nt,	23	+/100.00%			18	0.534012	48	CCGCACAAAATCGTGCCACC													11		12	CCGCATGAAATCGTGCCACC
7	20nt,	19	+/100.00%			19	0.0167928	25	CCGCACGATATCGTGCCACC													CCGCACGAATCGTGCCACT		10	CCGCACGAAAGCGTGCCACC
8	20nt,	11	+/100.00%			20	0.0288837	32	CCGCACTAAATCGTGCCACC													22		12	CCGCACAGAATCGTGCCACC
9	20nt,	96	+/100.00%			21	0.0308988	17	CCGCACTAATAGTGCCAAC	CCGCACGAAATCGTGTCACC	CCGCACGAAAACGTGCCACC	CCGCACGAATCGCGCCACC	CCGCACGGATCGTGCCACC	CCGCACGAACTCGTGCCACC	CCGCACGATGTGCCACC							CCGCACGAAATCTTGCCACC		14	CCGCCCGAAATCGTGCCACC
10	20nt,	14	+/100.00%			22	0.0530654	14	CCGCACTAAATAGTGCCAAC	CCGCACGAAATCGTGCCAAC	CCGCCCGAAATCGTGCCACC	CCGCACGAAGTCGTGCCACC	CCGCACAAATCGTGCCACC	CCGCACGTATCGTGCCACC	CCGCACGAACCGTGCCACC	CCGCACAGATGTGCCACC	CCGCACGAATTGTGCCACC					31		48	CCGCACAAAATCGTGCCACC
11	20nt,	36	+/100.00%			23	0.0403028	11	CCGCACGAAATCGTGCCACC	CCGCACGAATCGTGCCACT	CCGCACTAATCGTGCCACC	CCGCACGAAACCGTGCCACC	CCGCACGATTCGTGCCACC									CCGCACGAAATCATGCCACC		25	CCGCACGATATCGTGCCACC
12	20nt,	27	+/100.00%			24	0.0812773	22	CCGCACGAAATCTTGCCACC	CCGCACGAAATCGTACCACC	CCGCACGAAATCGCGCCACC	CCGCACACAAGTGTGCCACC										10		32	CCGCACTAAATCGTGCCACC
13	20nt,	15	+/100.00%			25	0.116206	29	CCGCACGAAATCGTGCCACA	CCGCACGAAATCGAGCCACC												CCGCACGAATCATGCCACC		11	CCGCACTAATCGTGCCACC
14	20nt,	10	+/100.00%			26	0.0255251	38	CCGCACGTAATCGTGCCACC	CCGCACGATTCGTGCCATC												14		17	CCGCACGAAAACGTGCCACC
15	20nt,	10	+/100.00%			27	0.0429897	26	CCGCACGAAATCGTGCCACT	CCGCACGGAATCGTGCCACC	CCGCACGAAATCGTGCCTCC	CCGCACGAAATCGTGCCGCC	CCGCACGACTCGTGCCACC									CCGCACGAAATCGTGCCAAC		14	CCGCACGAAGTCGTGCCACC
16	20nt,	11	+/100.00%			28	0.100757	26	CCGCACGAAATCGTGCCACT	CCGCACGGAATCGTGCCACC	CCGCACGAAATCGTGCCTCC	CCGCACGAAATCGTGCCGCC	CCGCACGACTCGTGCCACC									21		11	CCGCACGAAACCGTGCCACC
17	20nt,	33	+/100.00%			29	0.0879945	26	CCGCACGAAATCGTGCCACT	CCGCACGGAATCGTGCCACC	CCGCACGAAATCGTGCCTCC	CCGCACGAAATCGTGCCGCC	CCGCACGACTCGTGCCACC									CCGCACGAAATCGTGCCATC		17	CCGCACGAATCGCGCCACC
18	20nt,	12	+/100.00%			30	0.0853076	19	CCGCACGAGATCGTGCCACC	AATCGTGCCACC	CCGCACGAATGTGCCACC											15		22	CCGCACGAAATCGCGCCACC
19	20nt,	29	+/100.00%			31	0.288837	47	CCGCACGAATTCGTGCCACC													CCGCACGAAATCGTTCCACC		13	CCGCACGAAACC
20	20nt,	16	+/100.00%			32	0.0114191	17	CCGCACTAATAGTGCCAAC	CCGCACGAAATCGTGTCACC	CCGCACGAAAACGTGCCACC	CCGCACGAATCGCGCCACC	CCGCACGGATCGTGCCACC	CCGCACGAACTCGTGCCACC	CCGCACGATGTGCCACC							22		29	CCGCACGAAATCGAGCCACC
21	20nt,	117	+/100.00%			33	0.122252	20	CCGCACAAAATTGTGCCACC	CCGCACAGAACTGTGCCACC												CCGCACGAAATCGTACCACC		12	CCGCACGAATCGAGCCACC
22	20nt,	13	+/100.00%			34	0.0308988	13	CCGCACAAATGTGCCACC	CCGCACGAATCGTGCCACC	CCGCACGAAACC	CCGCACGAATCGTGCCGCC	CCGCACGAAATTGTGCCACC	CCGCACGATGCCACC	CCGCACAGACTGTGCCAAC	CCGCACGAATCGTGCTACC						40		14	CCGCACAAATCGTGCCACC
23	20nt,	35	+/100.00%			35	0.00671713	10	CCGCACGAATCATGCCACC	CCGCACGAAAGCGTGCCACC	CCGCACGAAACGTGCCACC	CCGCACAAATGTGCTACC	CCGCACAAAAGTGCCACC	CCGCACTAATGTGCCACC	CCGCACAATGTGCCACC	CCGCACGAAATAGTGCCACC	CCGCACGAATGGAACC	CCGCACGAATCGTGCCAAC	CCGCACAGAACTGTGCCAAC	ATCGTGCCATC	CCGCACAGAACTGCGCCACC	CCGCACGAAATCGTGCTACC		14	CCGCACGTATCGTGCCACC
24	20nt,	17	+/100.00%			36	0.637456	10	CCGCACGAATCATGCCACC	CCGCACGAAAGCGTGCCACC	CCGCACGAAACGTGCCACC	CCGCACAAATGTGCTACC	CCGCACAAAAGTGCCACC	CCGCACTAATGTGCCACC	CCGCACAATGTGCCACC	CCGCACGAAATAGTGCCACC	CCGCACGAATGGAACC	CCGCACGAATCGTGCCAAC	CCGCACAGAACTGTGCCAAC	ATCGTGCCATC	CCGCACAGAACTGCGCCACC	17		38	CCGCACGTAATCGTGCCACC
25	20nt,	14	+/100.00%			37	0.149792	22	CCGCACGAAATCTTGCCACC	CCGCACGAAATCGTACCACC	CCGCACGAAATCGCGCCACC	CCGCACACAAGTGTGCCACC										CCGCACGAAATCGTGTCACC		26	CCGCACGGAATCGTGCCACC
Cluster	3			61098	41.0403	38	1.66921	20	CCGCACAAAATTGTGCCACC	CCGCACAGAACTGTGCCACC												12		26	CCGCACGAAATCGTGCCTCC
0	20nt,	11				39	0.00671713	10	CCGCACGAATCATGCCACC	CCGCACGAAAGCGTGCCACC	CCGCACGAAACGTGCCACC	CCGCACAAATGTGCTACC	CCGCACAAAAGTGCCACC	CCGCACTAATGTGCCACC	CCGCACAATGTGCCACC	CCGCACGAAATAGTGCCACC	CCGCACGAATGGAACC	CCGCACGAATCGTGCCAAC	CCGCACAGAACTGTGCCAAC	ATCGTGCCATC	CCGCACAGAACTGCGCCACC	CCGCATGAAATCGTGCCACC		12	CCGCACGAATCGTGCCTCC
1	20nt,	30	+/100.00%			40	0.192782	17	CCGCACTAATAGTGCCAAC	CCGCACGAAATCGTGTCACC	CCGCACGAAAACGTGCCACC	CCGCACGAATCGCGCCACC	CCGCACGGATCGTGCCACC	CCGCACGAACTCGTGCCACC	CCGCACGATGTGCCACC							10		26	CCGCACGAAATCGTGCCGCC
2	20nt,	28	+/100.00%			41	0.0470199	15	CACCTGGGCATCGCTCCACC	CCGCACTGACAGTGCCAAC	CCGCACGAAATCGTTCCACC	CCGCACATATGTGCCACC	AATGTGCCACC	CCGCACGAACC	CCGCACACAGTGTGCCACC	CCGCACAGACTGTGCCACC						CCGCACGAAAGCGTGCCACC		13	CCGCACGAATCGTGCCGCC
3	20nt,	27	+/100.00%			42	32.0663	13	CCGCACAAATGTGCCACC	CCGCACGAATCGTGCCACC	CCGCACGAAACC	CCGCACGAATCGTGCCGCC	CCGCACGAAATTGTGCCACC	CCGCACGATGCCACC	CCGCACAGACTGTGCCAAC	CCGCACGAATCGTGCTACC						12		19	CCGCACGAGATCGTGCCACC
4	20nt,	26	+/100.00%			43	0.0147777	11	CCGCACGAAATCGTGCCACC	CCGCACGAATCGTGCCACT	CCGCACTAATCGTGCCACC	CCGCACGAAACCGTGCCACC	CCGCACGATTCGTGCCACC									CCGCACAGAATCGTGCCACC		11	CCGCACGATTCGTGCCACC
5	20nt,	23	+/100.00%			44	0.014106	10	CCGCACGAATCATGCCACC	CCGCACGAAAGCGTGCCACC	CCGCACGAAACGTGCCACC	CCGCACAAATGTGCTACC	CCGCACAAAAGTGCCACC	CCGCACTAATGTGCCACC	CCGCACAATGTGCCACC	CCGCACGAAATAGTGCCACC	CCGCACGAATGGAACC	CCGCACGAATCGTGCCAAC	CCGCACAGAACTGTGCCAAC	ATCGTGCCATC	CCGCACAGAACTGCGCCACC	14		12	CCGCCCGAATCGTGCCACC
6	20nt,	21	+/100.00%			45	0.0268685	11	CCGCACGAAATCGTGCCACC	CCGCACGAATCGTGCCACT	CCGCACTAATCGTGCCACC	CCGCACGAAACCGTGCCACC	CCGCACGATTCGTGCCACC									CCGCCCGAAATCGTGCCACC		47	CCGCACGAATTCGTGCCACC
7	20nt,	19	+/100.00%			46	0.0470199	17	CCGCACTAATAGTGCCAAC	CCGCACGAAATCGTGTCACC	CCGCACGAAAACGTGCCACC	CCGCACGAATCGCGCCACC	CCGCACGGATCGTGCCACC	CCGCACGAACTCGTGCCACC	CCGCACGATGTGCCACC							48		17	CCGCACGGATCGTGCCACC
8	20nt,	16	+/100.00%			47	0.0450048	12	CCGCATGAAATCGTGCCACC	CCGCACAGAATCGTGCCACC	CCGCACGAATCGAGCCACC	CCGCACGAATCGTGCCTCC	CCGCCCGAATCGTGCCACC	CCGCACAAATGTGCCGCC	CCGCACAAATGTGCCTCC	CCGCACAAATTGTGCCAAC	CCGCACGAATCGTGCCATC	ACGAATCGTGCCACC	CCGCACGAAGTGTGCCACC	CCGCACGAACTGTGCCACC		CCGCACAAAATCGTGCCACC		21	CCGCACGAGTCGTGCCACC
9	20nt,	11	+/100.00%			48	0.0409745	14	CCGCACTAAATAGTGCCAAC	CCGCACGAAATCGTGCCAAC	CCGCCCGAAATCGTGCCACC	CCGCACGAAGTCGTGCCACC	CCGCACAAATCGTGCCACC	CCGCACGTATCGTGCCACC	CCGCACGAACCGTGCCACC	CCGCACAGATGTGCCACC	CCGCACGAATTGTGCCACC					25		14	CCGCACGAACCGTGCCACC
10	20nt,	11	+/100.00%			49	0.00940399	14	CCGCACTAAATAGTGCCAAC	CCGCACGAAATCGTGCCAAC	CCGCCCGAAATCGTGCCACC	CCGCACGAAGTCGTGCCACC	CCGCACAAATCGTGCCACC	CCGCACGTATCGTGCCACC	CCGCACGAACCGTGCCACC	CCGCACAGATGTGCCACC	CCGCACGAATTGTGCCACC					CCGCACGATATCGTGCCACC		10	CCGCACGAAACGTGCCACC
11	20nt,	12	+/100.00%			50	0.0651562	12	CCGCATGAAATCGTGCCACC	CCGCACAGAATCGTGCCACC	CCGCACGAATCGAGCCACC	CCGCACGAATCGTGCCTCC	CCGCCCGAATCGTGCCACC	CCGCACAAATGTGCCGCC	CCGCACAAATGTGCCTCC	CCGCACAAATTGTGCCAAC	CCGCACGAATCGTGCCATC	ACGAATCGTGCCACC	CCGCACGAAGTGTGCCACC	CCGCACGAACTGTGCCACC		32		17	CCGCACGAACTCGTGCCACC
12	20nt,	11	+/100.00%			51	0.0409745	13	CCGCACAAATGTGCCACC	CCGCACGAATCGTGCCACC	CCGCACGAAACC	CCGCACGAATCGTGCCGCC	CCGCACGAAATTGTGCCACC	CCGCACGATGCCACC	CCGCACAGACTGTGCCAAC	CCGCACGAATCGTGCTACC						CCGCACTAAATCGTGCCACC		26	CCGCACGACTCGTGCCACC
13	20nt,	10	+/100.00%			52	0.519906	11	CCGCACGAAATCGTGCCACC	CCGCACGAATCGTGCCACT	CCGCACTAATCGTGCCACC	CCGCACGAAACCGTGCCACC	CCGCACGATTCGTGCCACC									11		19	AATCGTGCCACC
14	20nt,	47	+/100.00%			53	0.00806056	12	CCGCATGAAATCGTGCCACC	CCGCACAGAATCGTGCCACC	CCGCACGAATCGAGCCACC	CCGCACGAATCGTGCCTCC	CCGCCCGAATCGTGCCACC	CCGCACAAATGTGCCGCC	CCGCACAAATGTGCCTCC	CCGCACAAATTGTGCCAAC	CCGCACGAATCGTGCCATC	ACGAATCGTGCCACC	CCGCACGAAGTGTGCCACC	CCGCACGAACTGTGCCACC		CCGCACTAATCGTGCCACC		15	CCGCACATATGTGCCACC
15	20nt,	36	+/100.00%			54	0.0114191	17	CCGCACTAATAGTGCCAAC	CCGCACGAAATCGTGTCACC	CCGCACGAAAACGTGCCACC	CCGCACGAATCGCGCCACC	CCGCACGGATCGTGCCACC	CCGCACGAACTCGTGCCACC	CCGCACGATGTGCCACC							17		12	CCGCACAAATGTGCCGCC
16	20nt,	30	+/100.00%			55	0.032914	21	CCGCACGAAATCGTGCCATC	CCGCACGAGTCGTGCCACC												CCGCACGAAAACGTGCCACC		10	CCGCACAAATGTGCTACC
17	20nt,	28	+/100.00%			56	0.0161211	14	CCGCACTAAATAGTGCCAAC	CCGCACGAAATCGTGCCAAC	CCGCCCGAAATCGTGCCACC	CCGCACGAAGTCGTGCCACC	CCGCACAAATCGTGCCACC	CCGCACGTATCGTGCCACC	CCGCACGAACCGTGCCACC	CCGCACAGATGTGCCACC	CCGCACGAATTGTGCCACC					14		10	CCGCACAAAAGTGCCACC
18	20nt,	25	+/100.00%			57	0.00671713	10	CCGCACGAATCATGCCACC	CCGCACGAAAGCGTGCCACC	CCGCACGAAACGTGCCACC	CCGCACAAATGTGCTACC	CCGCACAAAAGTGCCACC	CCGCACTAATGTGCCACC	CCGCACAATGTGCCACC	CCGCACGAAATAGTGCCACC	CCGCACGAATGGAACC	CCGCACGAATCGTGCCAAC	CCGCACAGAACTGTGCCAAC	ATCGTGCCATC	CCGCACAGAACTGCGCCACC	CCGCACGAAGTCGTGCCACC		15	AATGTGCCACC
19	20nt,	20	+/100.00%			58	0.0174646	26	CCGCACGAAATCGTGCCACT	CCGCACGGAATCGTGCCACC	CCGCACGAAATCGTGCCTCC	CCGCACGAAATCGTGCCGCC	CCGCACGACTCGTGCCACC									11		19	CCGCACGAATGTGCCACC
20	20nt,	19	+/100.00%			59	0.0900096	24	CCGCACAAATTGTGCCACC													CCGCACGAAACCGTGCCACC		24	CCGCACAAATTGTGCCACC
21	20nt,	14	+/100.00%			60	0.00940399	14	CCGCACTAAATAGTGCCAAC	CCGCACGAAATCGTGCCAAC	CCGCCCGAAATCGTGCCACC	CCGCACGAAGTCGTGCCACC	CCGCACAAATCGTGCCACC	CCGCACGTATCGTGCCACC	CCGCACGAACCGTGCCACC	CCGCACAGATGTGCCACC	CCGCACGAATTGTGCCACC					17		20	CCGCACAAAATTGTGCCACC
22	20nt,	13	+/100.00%			61	0.417134	10	CCGCACGAATCATGCCACC	CCGCACGAAAGCGTGCCACC	CCGCACGAAACGTGCCACC	CCGCACAAATGTGCTACC	CCGCACAAAAGTGCCACC	CCGCACTAATGTGCCACC	CCGCACAATGTGCCACC	CCGCACGAAATAGTGCCACC	CCGCACGAATGGAACC	CCGCACGAATCGTGCCAAC	CCGCACAGAACTGTGCCAAC	ATCGTGCCATC	CCGCACAGAACTGCGCCACC	CCGCACGAATCGCGCCACC		12	CCGCACAAATGTGCCTCC
23	20nt,	13	+/100.00%			62	0.191438	13	CCGCACAAATGTGCCACC	CCGCACGAATCGTGCCACC	CCGCACGAAACC	CCGCACGAATCGTGCCGCC	CCGCACGAAATTGTGCCACC	CCGCACGATGCCACC	CCGCACAGACTGTGCCAAC	CCGCACGAATCGTGCTACC						22		17	CCGCACGATGTGCCACC
24	20nt,	13	+/100.00%			63	0.562896	12	CCGCATGAAATCGTGCCACC	CCGCACAGAATCGTGCCACC	CCGCACGAATCGAGCCACC	CCGCACGAATCGTGCCTCC	CCGCCCGAATCGTGCCACC	CCGCACAAATGTGCCGCC	CCGCACAAATGTGCCTCC	CCGCACAAATTGTGCCAAC	CCGCACGAATCGTGCCATC	ACGAATCGTGCCACC	CCGCACGAAGTGTGCCACC	CCGCACGAACTGTGCCACC		CCGCACGAAATCGCGCCACC		14	CCGCACAGATGTGCCACC
25	20nt,	11	+/100.00%			64	0.140388	42	CCGCACTAATAGTGCCACC													13		10	CCGCACTAATGTGCCACC
26	20nt,	42	+/100.00%			65	0.297569	72	CCGCACTATTAGTGCCACC													CCGCACGAAACC		10	CCGCACAATGTGCCACC
27	20nt,	28	+/100.00%			66	1.39716	12	CCGCATGAAATCGTGCCACC	CCGCACAGAATCGTGCCACC	CCGCACGAATCGAGCCACC	CCGCACGAATCGTGCCTCC	CCGCCCGAATCGTGCCACC	CCGCACAAATGTGCCGCC	CCGCACAAATGTGCCTCC	CCGCACAAATTGTGCCAAC	CCGCACGAATCGTGCCATC	ACGAATCGTGCCACC	CCGCACGAAGTGTGCCACC	CCGCACGAACTGTGCCACC		29		13	CCGCACGAAATTGTGCCACC
28	20nt,	28	+/100.00%			67	0.0893379	38	CCGCACGTAATCGTGCCACC	CCGCACGATTCGTGCCATC												CCGCACGAAATCGAGCCACC		10	CCGCACGAAATAGTGCCACC
29	20nt,	22	+/100.00%			68	0.00873228	13	CCGCACAAATGTGCCACC	CCGCACGAATCGTGCCACC	CCGCACGAAACC	CCGCACGAATCGTGCCGCC	CCGCACGAAATTGTGCCACC	CCGCACGATGCCACC	CCGCACAGACTGTGCCAAC	CCGCACGAATCGTGCTACC						12		14	CCGCACGAATTGTGCCACC
30	20nt,	21	+/100.00%			69	0.00806056	12	CCGCATGAAATCGTGCCACC	CCGCACAGAATCGTGCCACC	CCGCACGAATCGAGCCACC	CCGCACGAATCGTGCCTCC	CCGCCCGAATCGTGCCACC	CCGCACAAATGTGCCGCC	CCGCACAAATGTGCCTCC	CCGCACAAATTGTGCCAAC	CCGCACGAATCGTGCCATC	ACGAATCGTGCCACC	CCGCACGAAGTGTGCCACC	CCGCACGAACTGTGCCACC		CCGCACGAATCGAGCCACC		10	CCGCACGAATGGAACC
31	20nt,	20	+/100.00%			70	0.0349291	15	CACCTGGGCATCGCTCCACC	CCGCACTGACAGTGCCAAC	CCGCACGAAATCGTTCCACC	CCGCACATATGTGCCACC	AATGTGCCACC	CCGCACGAACC	CCGCACACAGTGTGCCACC	CCGCACAGACTGTGCCACC						14		13	CCGCACGATGCCACC
32	20nt,	17	+/100.00%			71	0.0658279	15	CACCTGGGCATCGCTCCACC	CCGCACTGACAGTGCCAAC	CCGCACGAAATCGTTCCACC	CCGCACATATGTGCCACC	AATGTGCCACC	CCGCACGAACC	CCGCACACAGTGTGCCACC	CCGCACAGACTGTGCCACC						CCGCACAAATCGTGCCACC		60	CCGCACGAATGCCACC
33	20nt,	14	+/100.00%			72	0.00806056	12	CCGCATGAAATCGTGCCACC	CCGCACAGAATCGTGCCACC	CCGCACGAATCGAGCCACC	CCGCACGAATCGTGCCTCC	CCGCCCGAATCGTGCCACC	CCGCACAAATGTGCCGCC	CCGCACAAATGTGCCTCC	CCGCACAAATTGTGCCAAC	CCGCACGAATCGTGCCATC	ACGAATCGTGCCACC	CCGCACGAAGTGTGCCACC	CCGCACGAACTGTGCCACC		14		15	CCGCACGAACC
34	20nt,	12	+/100.00%			73	14.8596	13	CCGCACAAATGTGCCACC	CCGCACGAATCGTGCCACC	CCGCACGAAACC	CCGCACGAATCGTGCCGCC	CCGCACGAAATTGTGCCACC	CCGCACGATGCCACC	CCGCACAGACTGTGCCAAC	CCGCACGAATCGTGCTACC						CCGCACGTATCGTGCCACC		10	CCGCACGAATCGTGCCAAC
35	20nt,	11	+/100.00%			74	0.0100757	15	CACCTGGGCATCGCTCCACC	CCGCACTGACAGTGCCAAC	CCGCACGAAATCGTTCCACC	CCGCACATATGTGCCACC	AATGTGCCACC	CCGCACGAACC	CCGCACACAGTGTGCCACC	CCGCACAGACTGTGCCACC						38		13	CCGCACAGACTGTGCCAAC
36	20nt,	65	+/100.00%			75	0.00806056	12	CCGCATGAAATCGTGCCACC	CCGCACAGAATCGTGCCACC	CCGCACGAATCGAGCCACC	CCGCACGAATCGTGCCTCC	CCGCCCGAATCGTGCCACC	CCGCACAAATGTGCCGCC	CCGCACAAATGTGCCTCC	CCGCACAAATTGTGCCAAC	CCGCACGAATCGTGCCATC	ACGAATCGTGCCACC	CCGCACGAAGTGTGCCACC	CCGCACGAACTGTGCCACC		CCGCACGTAATCGTGCCACC		10	CCGCACAGAACTGTGCCAAC
37	20nt,	50	+/100.00%			76	0.00671713	10	CCGCACGAATCATGCCACC	CCGCACGAAAGCGTGCCACC	CCGCACGAAACGTGCCACC	CCGCACAAATGTGCTACC	CCGCACAAAAGTGCCACC	CCGCACTAATGTGCCACC	CCGCACAATGTGCCACC	CCGCACGAAATAGTGCCACC	CCGCACGAATGGAACC	CCGCACGAATCGTGCCAAC	CCGCACAGAACTGTGCCAAC	ATCGTGCCATC	CCGCACAGAACTGCGCCACC	26		12	CCGCACAAATTGTGCCAAC
38	20nt,	40	+/100.00%			77	0.00671713	10	CCGCACGAATCATGCCACC	CCGCACGAAAGCGTGCCACC	CCGCACGAAACGTGCCACC	CCGCACAAATGTGCTACC	CCGCACAAAAGTGCCACC	CCGCACTAATGTGCCACC	CCGCACAATGTGCCACC	CCGCACGAAATAGTGCCACC	CCGCACGAATGGAACC	CCGCACGAATCGTGCCAAC	CCGCACAGAACTGTGCCAAC	ATCGTGCCATC	CCGCACAGAACTGCGCCACC	CCGCACGGAATCGTGCCACC		42	CCGCACTAATAGTGCCACC
39	20nt,	40	+/100.00%			78	0.542073	19	CCGCACGAGATCGTGCCACC	AATCGTGCCACC	CCGCACGAATGTGCCACC											26		72	CCGCACTATTAGTGCCACC
40	20nt,	27	+/100.00%			79	0.00806056	12	CCGCATGAAATCGTGCCACC	CCGCACAGAATCGTGCCACC	CCGCACGAATCGAGCCACC	CCGCACGAATCGTGCCTCC	CCGCCCGAATCGTGCCACC	CCGCACAAATGTGCCGCC	CCGCACAAATGTGCCTCC	CCGCACAAATTGTGCCAAC	CCGCACGAATCGTGCCATC	ACGAATCGTGCCACC	CCGCACGAAGTGTGCCACC	CCGCACGAACTGTGCCACC		CCGCACGAAATCGTGCCTCC		12	CCGCACGAATCGTGCCATC
41	20nt,	25	+/100.00%			80	0.0194797	14	CCGCACTAAATAGTGCCAAC	CCGCACGAAATCGTGCCAAC	CCGCCCGAAATCGTGCCACC	CCGCACGAAGTCGTGCCACC	CCGCACAAATCGTGCCACC	CCGCACGTATCGTGCCACC	CCGCACGAACCGTGCCACC	CCGCACAGATGTGCCACC	CCGCACGAATTGTGCCACC					12		38	CCGCACGATTCGTGCCATC
42	20nt,	25	+/100.00%			81	0.00671713	10	CCGCACGAATCATGCCACC	CCGCACGAAAGCGTGCCACC	CCGCACGAAACGTGCCACC	CCGCACAAATGTGCTACC	CCGCACAAAAGTGCCACC	CCGCACTAATGTGCCACC	CCGCACAATGTGCCACC	CCGCACGAAATAGTGCCACC	CCGCACGAATGGAACC	CCGCACGAATCGTGCCAAC	CCGCACAGAACTGTGCCAAC	ATCGTGCCATC	CCGCACAGAACTGCGCCACC	CCGCACGAATCGTGCCTCC		10	ATCGTGCCATC
43	20nt,	24	+/100.00%			82	0.0933682	17	CCGCACTAATAGTGCCAAC	CCGCACGAAATCGTGTCACC	CCGCACGAAAACGTGCCACC	CCGCACGAATCGCGCCACC	CCGCACGGATCGTGCCACC	CCGCACGAACTCGTGCCACC	CCGCACGATGTGCCACC							26		13	CCGCACGAATCGTGCTACC
44	20nt,	21	+/100.00%			83	0.0228383	10	CCGCACGAATCATGCCACC	CCGCACGAAAGCGTGCCACC	CCGCACGAAACGTGCCACC	CCGCACAAATGTGCTACC	CCGCACAAAAGTGCCACC	CCGCACTAATGTGCCACC	CCGCACAATGTGCCACC	CCGCACGAAATAGTGCCACC	CCGCACGAATGGAACC	CCGCACGAATCGTGCCAAC	CCGCACAGAACTGTGCCAAC	ATCGTGCCATC	CCGCACAGAACTGCGCCACC	CCGCACGAAATCGTGCCGCC		12	ACGAATCGTGCCACC
45	20nt,	20	+/100.00%			84	0.00671713	10	CCGCACGAATCATGCCACC	CCGCACGAAAGCGTGCCACC	CCGCACGAAACGTGCCACC	CCGCACAAATGTGCTACC	CCGCACAAAAGTGCCACC	CCGCACTAATGTGCCACC	CCGCACAATGTGCCACC	CCGCACGAAATAGTGCCACC	CCGCACGAATGGAACC	CCGCACGAATCGTGCCAAC	CCGCACAGAACTGTGCCAAC	ATCGTGCCATC	CCGCACAGAACTGCGCCACC	13		22	CCGCACACAAGTGTGCCACC
46	20nt,	11	+/100.00%			85	0.0470199	60	CCGCACGAATGCCACC													CCGCACGAATCGTGCCGCC		12	CCGCACGAAGTGTGCCACC
47	20nt,	10	+/100.00%			86	0.00873228	13	CCGCACAAATGTGCCACC	CCGCACGAATCGTGCCACC	CCGCACGAAACC	CCGCACGAATCGTGCCGCC	CCGCACGAAATTGTGCCACC	CCGCACGATGCCACC	CCGCACAGACTGTGCCAAC	CCGCACGAATCGTGCTACC						19		15	CCGCACACAGTGTGCCACC
48	20nt,	10	+/100.00%			87	0.00806056	12	CCGCATGAAATCGTGCCACC	CCGCACAGAATCGTGCCACC	CCGCACGAATCGAGCCACC	CCGCACGAATCGTGCCTCC	CCGCCCGAATCGTGCCACC	CCGCACAAATGTGCCGCC	CCGCACAAATGTGCCTCC	CCGCACAAATTGTGCCAAC	CCGCACGAATCGTGCCATC	ACGAATCGTGCCACC	CCGCACGAAGTGTGCCACC	CCGCACGAACTGTGCCACC		CCGCACGAGATCGTGCCACC		20	CCGCACAGAACTGTGCCACC
49	20nt,	10	+/100.00%			88	0.118222	13	CCGCACAAATGTGCCACC	CCGCACGAATCGTGCCACC	CCGCACGAAACC	CCGCACGAATCGTGCCGCC	CCGCACGAAATTGTGCCACC	CCGCACGATGCCACC	CCGCACAGACTGTGCCAAC	CCGCACGAATCGTGCTACC						11		15	CCGCACAGACTGTGCCACC
50	20nt,	27	+/100.00%			89	0.560209	19	CCGCACGAGATCGTGCCACC	AATCGTGCCACC	CCGCACGAATGTGCCACC											CCGCACGATTCGTGCCACC		10	CCGCACAGAACTGCGCCACC
51	20nt,	49	+/100.00%			90	0.0100757	15	CACCTGGGCATCGCTCCACC	CCGCACTGACAGTGCCAAC	CCGCACGAAATCGTTCCACC	CCGCACATATGTGCCACC	AATGTGCCACC	CCGCACGAACC	CCGCACACAGTGTGCCACC	CCGCACAGACTGTGCCACC						12		12	CCGCACGAACTGTGCCACC
52	20nt,	44	+/100.00%			91	0.0100757	15	CACCTGGGCATCGCTCCACC	CCGCACTGACAGTGCCAAC	CCGCACGAAATCGTTCCACC	CCGCACATATGTGCCACC	AATGTGCCACC	CCGCACGAACC	CCGCACACAGTGTGCCACC	CCGCACAGACTGTGCCACC						CCGCCCGAATCGTGCCACC			end
53	20nt,	43	+/100.00%			92	0.00671713	10	CCGCACGAATCATGCCACC	CCGCACGAAAGCGTGCCACC	CCGCACGAAACGTGCCACC	CCGCACAAATGTGCTACC	CCGCACAAAAGTGCCACC	CCGCACTAATGTGCCACC	CCGCACAATGTGCCACC	CCGCACGAAATAGTGCCACC	CCGCACGAATGGAACC	CCGCACGAATCGTGCCAAC	CCGCACAGAACTGTGCCAAC	ATCGTGCCATC	CCGCACAGAACTGCGCCACC	47
54	20nt,	12	+/100.00%			93	0	#N/A	#N/A													CCGCACGAATTCGTGCCACC
55	20nt,	17	+/100.00%			94	#N/A	#N/A	#N/A													17
56	20nt,	14	+/100.00%			95	#N/A	#N/A	#N/A													CCGCACGGATCGTGCCACC
57	20nt,	25	+/100.00%			96	#N/A	#N/A	#N/A													21
58	20nt,	34	+/100.00%			97	#N/A	#N/A	#N/A													CCGCACGAGTCGTGCCACC
59	20nt,	46	+/100.00%			98	#N/A	#N/A	#N/A													14
60	20nt,	21	+/100.00%			99	#N/A	#N/A	#N/A													CCGCACGAACCGTGCCACC
61	20nt,	30	+/100.00%			100	#N/A	#N/A	#N/A													10
62	20nt,	15	+/100.00%			101	#N/A	#N/A	#N/A													CCGCACGAAACGTGCCACC
63	20nt,	30	+/100.00%			102	#N/A	#N/A	#N/A													17
64	20nt,	13	+/100.00%			103	#N/A	#N/A	#N/A													CCGCACGAACTCGTGCCACC
65	20nt,	29	+/100.00%			104	#N/A	#N/A	#N/A													26
66	20nt,	10	+/100.00%			105	#N/A	#N/A	#N/A													CCGCACGACTCGTGCCACC
67	20nt,	28	+/100.00%			106	#N/A	#N/A	#N/A													19
68	20nt,	14	+/100.00%			107	#N/A	#N/A	#N/A													AATCGTGCCACC
69	20nt,	15	+/100.00%			108	#N/A	#N/A	#N/A													15
70	20nt,	10	+/100.00%			109	#N/A	#N/A	#N/A													CCGCACATATGTGCCACC
71	20nt,	12	+/100.00%			110	#N/A	#N/A	#N/A													12
72	20nt,	12	+/100.00%			111	#N/A	#N/A	#N/A													CCGCACAAATGTGCCGCC
73	20nt,	16	+/100.00%			112	#N/A	#N/A	#N/A													10
74	20nt,	10	+/100.00%			113	#N/A	#N/A	#N/A													CCGCACAAATGTGCTACC
75	20nt,	12	+/100.00%			114	#N/A	#N/A	#N/A													10
76	20nt,	20	+/100.00%			115	#N/A	#N/A	#N/A													CCGCACAAAAGTGCCACC
77	20nt,	21	+/100.00%			116	#N/A	#N/A	#N/A													15
78	20nt,	21	+/100.00%			117	#N/A	#N/A	#N/A													AATGTGCCACC
79	20nt,	24	+/100.00%			118	#N/A	#N/A	#N/A													19
80	20nt,	11	+/100.00%			119	#N/A	#N/A	#N/A													CCGCACGAATGTGCCACC
81	20nt,	13	+/100.00%			120	#N/A	#N/A	#N/A													24
82	20nt,	12	+/100.00%			121	#N/A	#N/A	#N/A													CCGCACAAATTGTGCCACC
83	20nt,	16	+/100.00%			122	#N/A	#N/A	#N/A													20
84	20nt,	11	+/100.00%			123	#N/A	#N/A	#N/A													CCGCACAAAATTGTGCCACC
85	20nt,	13	+/100.00%			124	#N/A	#N/A	#N/A													12
86	20nt,	10	+/100.00%			125	#N/A	#N/A	#N/A													CCGCACAAATGTGCCTCC
87	20nt,	18	+/100.00%			126	#N/A	#N/A	#N/A													17
88	20nt,	10	+/100.00%			127	#N/A	#N/A	#N/A													CCGCACGATGTGCCACC
89	20nt,	22	+/100.00%			128	#N/A	#N/A	#N/A													14
90	20nt,	10	+/100.00%			129	#N/A	#N/A	#N/A													CCGCACAGATGTGCCACC
91	20nt,	19	+/100.00%			130	#N/A	#N/A	#N/A													10
92	20nt,	55	+/100.00%			131	#N/A	#N/A	#N/A													CCGCACTAATGTGCCACC
93	20nt,	11	+/100.00%			132	#N/A	#N/A	#N/A													10
94	20nt,	40	+/100.00%			133	#N/A	#N/A	#N/A													CCGCACAATGTGCCACC
95	20nt,	12	+/100.00%			134	#N/A	#N/A	#N/A													13
96	20nt,	22	+/100.00%			135	#N/A	#N/A	#N/A													CCGCACGAAATTGTGCCACC
97	20nt,	18	+/100.00%			136	#N/A	#N/A	#N/A													10
98	20nt,	21	+/100.00%			137	#N/A	#N/A	#N/A													CCGCACGAAATAGTGCCACC
99	20nt,	10	+/100.00%			138	#N/A	#N/A	#N/A													14
100	20nt,	18	+/100.00%			139	#N/A	#N/A	#N/A													CCGCACGAATTGTGCCACC
101	20nt,	22	+/100.00%			140	#N/A	#N/A	#N/A													10
102	20nt,	16	+/100.00%			141	#N/A	#N/A	#N/A													CCGCACGAATGGAACC
103	20nt,	48	+/100.00%			142	#N/A	#N/A	#N/A													13
104	20nt,	147	+/100.00%			143	#N/A	#N/A	#N/A													CCGCACGATGCCACC
105	20nt,	13	+/100.00%			144	#N/A	#N/A	#N/A													60
106	20nt,	56	+/100.00%			145	#N/A	#N/A	#N/A													CCGCACGAATGCCACC
107	20nt,	20	+/100.00%			146	#N/A	#N/A	#N/A													15
108	20nt,	18	+/100.00%			147	#N/A	#N/A	#N/A													CCGCACGAACC
109	20nt,	16	+/100.00%			148	#N/A	#N/A	#N/A													10
110	20nt,	33	+/100.00%			149	#N/A	#N/A	#N/A													CCGCACGAATCGTGCCAAC
111	20nt,	62	+/100.00%			150	#N/A	#N/A	#N/A													13
112	20nt,	21	+/100.00%			151	#N/A	#N/A	#N/A													CCGCACAGACTGTGCCAAC
113	20nt,	61	+/100.00%			152	#N/A	#N/A	#N/A													10
114	20nt,	13	+/100.00%			153	#N/A	#N/A	#N/A													CCGCACAGAACTGTGCCAAC
115	20nt,	24	+/100.00%			154	#N/A	#N/A	#N/A													12
116	20nt,	38	+/100.00%			155	#N/A	#N/A	#N/A													CCGCACAAATTGTGCCAAC
117	20nt,	29	+/100.00%			156	#N/A	#N/A	#N/A													42
118	20nt,	30	+/100.00%			157	#N/A	#N/A	#N/A													CCGCACTAATAGTGCCACC
119	20nt,	114	+/100.00%			158	#N/A	#N/A	#N/A													72
120	20nt,	12	+/100.00%			159	#N/A	#N/A	#N/A													CCGCACTATTAGTGCCACC
121	20nt,	18	+/100.00%			160	#N/A	#N/A	#N/A													12
122	20nt,	16	+/100.00%			161	#N/A	#N/A	#N/A													CCGCACGAATCGTGCCATC
123	20nt,	22	+/100.00%			162	#N/A	#N/A	#N/A													38
124	20nt,	73	+/100.00%			163	#N/A	#N/A	#N/A													CCGCACGATTCGTGCCATC
125	20nt,	20	+/100.00%			164	#N/A	#N/A	#N/A													10
126	20nt,	24	+/100.00%			165	#N/A	#N/A	#N/A													ATCGTGCCATC
127	20nt,	17	+/100.00%			166	#N/A	#N/A	#N/A													13
128	20nt,	19	+/100.00%			167	#N/A	#N/A	#N/A													CCGCACGAATCGTGCTACC
129	20nt,	15	+/100.00%			168	#N/A	#N/A	#N/A													12
130	20nt,	50	+/100.00%			169	#N/A	#N/A	#N/A													ACGAATCGTGCCACC
131	20nt,	29	+/100.00%			170	#N/A	#N/A	#N/A													22
132	20nt,	22	+/100.00%			171	#N/A	#N/A	#N/A													CCGCACACAAGTGTGCCACC
133	20nt,	46	+/100.00%			172	#N/A	#N/A	#N/A													12
134	20nt,	27	+/100.00%			173	#N/A	#N/A	#N/A													CCGCACGAAGTGTGCCACC
135	20nt,	10	+/100.00%			174	#N/A	#N/A	#N/A													15
136	20nt,	49	+/100.00%			175	#N/A	#N/A	#N/A													CCGCACACAGTGTGCCACC
137	20nt,	10	+/100.00%			176	#N/A	#N/A	#N/A													20
138	20nt,	17	+/100.00%			177	#N/A	#N/A	#N/A													CCGCACAGAACTGTGCCACC
139	20nt,	10	+/100.00%			178	#N/A	#N/A	#N/A													15
140	20nt,	20	+/100.00%			179	#N/A	#N/A	#N/A													CCGCACAGACTGTGCCACC
141	20nt,	15	+/100.00%			180	#N/A	#N/A	#N/A													10
142	20nt,	38	+/100.00%			181	#N/A	#N/A	#N/A													CCGCACAGAACTGCGCCACC
143	20nt,	32	+/100.00%			182	#N/A	#N/A	#N/A													12
144	20nt,	22	+/100.00%			183	#N/A	#N/A	#N/A													CCGCACGAACTGTGCCACC
145	20nt,	21	+/100.00%			184	#N/A	#N/A	#N/A													end
146	20nt,	19	+/100.00%			185	#N/A	#N/A	#N/A
147	20nt,	19	+/100.00%			186	#N/A	#N/A	#N/A
148	20nt,	16	+/100.00%			187	#N/A	#N/A	#N/A
149	20nt,	16	+/100.00%			188	#N/A	#N/A	#N/A
150	20nt,	15	+/100.00%			189	#N/A	#N/A	#N/A
151	20nt,	11	+/100.00%			190	#N/A	#N/A	#N/A
152	20nt,	11	+/100.00%			191	#N/A	#N/A	#N/A
153	20nt,	13	+/100.00%			192	#N/A	#N/A	#N/A
154	20nt,	27	+/100.00%			193	#N/A	#N/A	#N/A
155	20nt,	22	+/100.00%			194	#N/A	#N/A	#N/A
156	20nt,	19	+/100.00%			195	#N/A	#N/A	#N/A
157	20nt,	19	+/100.00%			196	#N/A	#N/A	#N/A
158	20nt,	17	+/100.00%			197	#N/A	#N/A	#N/A
159	20nt,	15	+/100.00%			198	#N/A	#N/A	#N/A
160	20nt,	13	+/100.00%			199	#N/A	#N/A	#N/A
161	20nt,	13	+/100.00%			200	#N/A	#N/A	#N/A
162	20nt,	12	+/100.00%
163	20nt,	12	+/100.00%
164	20nt,	12	+/100.00%
165	20nt,	11	+/100.00%
166	20nt,	10	+/100.00%
167	20nt,	16	+/100.00%
168	20nt,	26	+/100.00%
169	20nt,	10	+/100.00%
170	20nt,	150	+/100.00%
171	20nt,	22	+/100.00%
172	20nt,	55	+/100.00%
173	20nt,	10	+/100.00%
174	20nt,	199	+/100.00%
175	20nt,	23	+/100.00%
176	20nt,	10	+/100.00%
177	20nt,	19	+/100.00%
178	20nt,	18	+/100.00%
179	20nt,	16	+/100.00%
180	20nt,	13	+/100.00%
181	20nt,	12	+/100.00%
182	20nt,	16	+/100.00%
183	20nt,	11	+/100.00%
184	20nt,	30	+/100.00%
185	20nt,	35	+/100.00%
186	20nt,	16	+/100.00%
187	20nt,	11	+/100.00%
188	20nt,	31	+/100.00%
189	20nt,	28	+/100.00%
190	20nt,	17	+/100.00%
191	20nt,	16	+/100.00%
192	20nt,	16	+/100.00%
193	20nt,	63	+/100.00%
194	20nt,	59	+/100.00%
195	20nt,	14	+/100.00%
196	20nt,	10	+/100.00%
197	20nt,	14	+/100.00%
198	20nt,	69	+/100.00%
199	20nt,	12	+/100.00%
200	20nt,	43	+/100.00%
201	20nt,	15	+/100.00%
202	20nt,	10	+/100.00%
203	20nt,	39	+/100.00%
204	20nt,	15	+/100.00%
205	20nt,	130	+/100.00%
206	20nt,	56	+/100.00%
207	20nt,	27	+/100.00%
208	20nt,	51	+/100.00%
209	20nt,	19	+/100.00%
210	20nt,	10	+/100.00%
211	20nt,	31	+/100.00%
212	20nt,	47	+/100.00%
213	20nt,	18	+/100.00%
214	20nt,	15	+/100.00%
215	20nt,	33	+/100.00%
216	20nt,	11	+/100.00%
217	20nt,	145	+/100.00%
218	20nt,	83	+/100.00%
219	20nt,	12	+/100.00%
220	20nt,	15	+/100.00%
221	20nt,	14	+/100.00%
222	20nt,	10	+/100.00%
223	20nt,	18	+/100.00%
224	20nt,	12	+/100.00%
225	20nt,	21	+/100.00%
226	20nt,	21	+/100.00%
227	20nt,	65	+/100.00%
228	20nt,	39	+/100.00%
229	20nt,	39	+/100.00%
230	20nt,	36	+/100.00%
231	20nt,	12	+/100.00%
232	20nt,	10	+/100.00%
233	20nt,	48	+/100.00%
234	20nt,	14	+/100.00%
235	20nt,	374	+/100.00%
236	20nt,	21	+/100.00%
237	20nt,	10	+/100.00%
238	20nt,	10	+/100.00%
239	20nt,	11	+/100.00%
240	20nt,	12	+/100.00%
241	20nt,	12	+/100.00%
242	20nt,	12	+/100.00%
243	20nt,	13	+/100.00%
244	20nt,	14	+/100.00%
245	20nt,	15	+/100.00%
246	20nt,	19	+/100.00%
247	20nt,	20	+/100.00%
248	20nt,	20	+/100.00%
249	20nt,	22	+/100.00%
250	20nt,	23	+/100.00%
251	20nt,	23	+/100.00%
252	20nt,	26	+/100.00%
253	20nt,	27	+/100.00%
254	20nt,	32	+/100.00%
255	20nt,	41	+/100.00%
256	20nt,	82	+/100.00%
257	20nt,	47	+/100.00%
258	20nt,	46	+/100.00%
259	20nt,	36	+/100.00%
260	20nt,	31	+/100.00%
261	20nt,	22	+/100.00%
262	20nt,	16	+/100.00%
263	20nt,	10	+/100.00%
264	20nt,	13	+/100.00%
265	20nt,	12	+/100.00%
266	20nt,	202	+/100.00%
267	20nt,	112	+/100.00%
268	20nt,	68	+/100.00%
269	20nt,	10	+/100.00%
270	20nt,	11	+/100.00%
271	20nt,	16	+/100.00%
272	20nt,	44	+/100.00%
273	20nt,	53	+/100.00%
274	20nt,	282	+/100.00%
275	20nt,	22	+/100.00%
276	20nt,	15	+/100.00%
277	20nt,	13	+/100.00%
278	20nt,	12	+/100.00%
279	20nt,	13	+/100.00%
280	20nt,	12	+/100.00%
281	20nt,	14	+/100.00%
282	20nt,	18	+/100.00%
283	20nt,	20	+/100.00%
284	20nt,	35	+/100.00%
285	20nt,	888	+/100.00%
286	20nt,	41	+/100.00%
287	20nt,	39	+/100.00%
288	20nt,	30	+/100.00%
289	20nt,	20	+/100.00%
290	20nt,	17	+/100.00%
291	20nt,	17	+/100.00%
292	20nt,	16	+/100.00%
293	20nt,	16	+/100.00%
294	20nt,	16	+/100.00%
295	20nt,	15	+/100.00%
296	20nt,	13	+/100.00%
297	20nt,	13	+/100.00%
298	20nt,	12	+/100.00%
299	20nt,	12	+/100.00%
300	20nt,	12	+/100.00%
301	20nt,	11	+/100.00%
302	20nt,	11	+/100.00%
303	20nt,	10	+/100.00%
304	20nt,	10	+/100.00%
305	20nt,	11	+/100.00%
306	20nt,	15	+/100.00%
307	20nt,	18	+/100.00%
308	20nt,	20	+/100.00%
309	20nt,	24	+/100.00%
310	20nt,	25	+/100.00%
311	20nt,	32	+/100.00%
312	20nt,	38	+/100.00%
313	20nt,	44	+/100.00%
314	20nt,	71	+/100.00%
315	20nt,	73	+/100.00%
316	20nt,	97	+/100.00%
317	20nt,	98	+/100.00%
318	20nt,	106	+/100.00%
319	20nt,	133	+/100.00%
320	20nt,	154	+/100.00%
321	20nt,	193	+/100.00%
322	20nt,	373	+/100.00%
323	20nt,	37	+/100.00%
324	20nt,	19	+/100.00%
325	20nt,	18	+/100.00%
326	20nt,	15	+/100.00%
327	20nt,	14	+/100.00%
328	20nt,	13	+/100.00%
329	20nt,	13	+/100.00%
330	20nt,	12	+/100.00%
331	20nt,	11	+/100.00%
332	20nt,	11	+/100.00%
333	20nt,	10	+/100.00%
334	20nt,	16	+/100.00%
335	20nt,	61	+/100.00%
336	20nt,	20	+/100.00%
337	20nt,	14	+/100.00%
338	20nt,	12	+/100.00%
339	20nt,	11	+/100.00%
340	20nt,	42	+/100.00%
341	20nt,	66	+/100.00%
342	20nt,	820	+/100.00%
343	20nt,	8203	+/100.00%
344	20nt,	186	+/100.00%
345	20nt,	182	+/100.00%
346	20nt,	158	+/100.00%
347	20nt,	81	+/100.00%
348	20nt,	52	+/100.00%
349	20nt,	45	+/100.00%
350	20nt,	42	+/100.00%
351	20nt,	41	+/100.00%
352	20nt,	34	+/100.00%
353	20nt,	24	+/100.00%
354	20nt,	22	+/100.00%
355	20nt,	22	+/100.00%
356	20nt,	21	+/100.00%
357	20nt,	20	+/100.00%
358	20nt,	20	+/100.00%
359	20nt,	17	+/100.00%
360	20nt,	15	+/100.00%
361	20nt,	15	+/100.00%
362	20nt,	15	+/100.00%
363	20nt,	14	+/100.00%
364	20nt,	14	+/100.00%
365	20nt,	13	+/100.00%
366	20nt,	12	+/100.00%
367	20nt,	11	+/100.00%
368	20nt,	10	+/100.00%
369	20nt,	14	+/100.00%
370	20nt,	12	+/100.00%
371	20nt,	12	+/100.00%
372	20nt,	15	+/100.00%
373	20nt,	18	+/100.00%
374	20nt,	37	+/100.00%
375	20nt,	13	+/100.00%
376	20nt,	10	+/100.00%
377	20nt,	32	+/100.00%
378	20nt,	29	+/100.00%
379	20nt,	20	+/100.00%
380	20nt,	15	+/100.00%
381	20nt,	13	+/100.00%
382	20nt,	13	+/100.00%
383	20nt,	11	+/100.00%
384	20nt,	11	+/100.00%
385	20nt,	10	+/100.00%
386	20nt,	35	+/100.00%
387	20nt,	34	+/100.00%
388	20nt,	22	+/100.00%
389	20nt,	10	+/100.00%
390	20nt,	27	+/100.00%
391	20nt,	11	+/100.00%
392	20nt,	34	+/100.00%
393	20nt,	15	+/100.00%
394	20nt,	66	+/100.00%
395	20nt,	189	+/100.00%
396	20nt,	636	+/100.00%
397	20nt,	1659	+/100.00%
398	20nt,	68	+/100.00%
399	20nt,	37	+/100.00%
400	20nt,	32	+/100.00%
401	20nt,	29	+/100.00%
402	20nt,	23	+/100.00%
403	20nt,	16	+/100.00%
404	20nt,	15	+/100.00%
405	20nt,	15	+/100.00%
406	20nt,	15	+/100.00%
407	20nt,	14	+/100.00%
408	20nt,	14	+/100.00%
409	20nt,	13	+/100.00%
410	20nt,	13	+/100.00%
411	20nt,	11	+/100.00%
412	20nt,	10	+/100.00%
413	20nt,	19	+/100.00%
414	20nt,	107	+/100.00%
415	20nt,	2907	+/100.00%
416	20nt,	70	+/100.00%
417	20nt,	69	+/100.00%
418	20nt,	50	+/100.00%
419	20nt,	30	+/100.00%
420	20nt,	22	+/100.00%
421	20nt,	15	+/100.00%
422	20nt,	15	+/100.00%
423	20nt,	15	+/100.00%
424	20nt,	13	+/100.00%
425	20nt,	12	+/100.00%
426	20nt,	12	+/100.00%
427	20nt,	11	+/100.00%
428	20nt,	13	+/100.00%
429	20nt,	20	+/100.00%
430	20nt,	11	+/100.00%
431	20nt,	12	+/100.00%
432	20nt,	14	+/100.00%
433	20nt,	20	+/100.00%
434	20nt,	10	+/100.00%
435	20nt,	31	+/100.00%
436	20nt,	24	+/100.00%
437	20nt,	14	+/100.00%
438	20nt,	10	+/100.00%
439	20nt,	34	+/100.00%
440	20nt,	49	+/100.00%
441	20nt,	10	+/100.00%
442	20nt,	10	+/100.00%
443	20nt,	12	+/100.00%
444	20nt,	19	+/100.00%
445	20nt,	21	+/100.00%
446	20nt,	24	+/100.00%
447	20nt,	25	+/100.00%
448	20nt,	30	+/100.00%
449	20nt,	32	+/100.00%
450	20nt,	32	+/100.00%
451	20nt,	37	+/100.00%
452	20nt,	58	+/100.00%
453	20nt,	69	+/100.00%
454	20nt,	130	+/100.00%
455	20nt,	17	+/100.00%
456	20nt,	16	+/100.00%
457	20nt,	118	+/100.00%
458	20nt,	22	+/100.00%
459	20nt,	51	+/100.00%
460	20nt,	10	+/100.00%
461	20nt,	32	+/100.00%
462	20nt,	12	+/100.00%
463	20nt,	48	+/100.00%
464	20nt,	176	+/100.00%
465	20nt,	34	+/100.00%
466	20nt,	12	+/100.00%
467	20nt,	32	+/100.00%
468	20nt,	35	+/100.00%
469	20nt,	27	+/100.00%
470	20nt,	13	+/100.00%
471	20nt,	12	+/100.00%
472	20nt,	145	+/100.00%
473	20nt,	26	+/100.00%
474	20nt,	23	+/100.00%
475	20nt,	17	+/100.00%
476	20nt,	12	+/100.00%
477	20nt,	38	+/100.00%
478	20nt,	11	+/100.00%
479	20nt,	10	+/100.00%
480	20nt,	30	+/100.00%
481	20nt,	19	+/100.00%
482	20nt,	17	+/100.00%
483	20nt,	11	+/100.00%
484	20nt,	78	+/100.00%
485	20nt,	16	+/100.00%
486	20nt,	38	+/100.00%
487	20nt,	41	+/100.00%
488	20nt,	12	+/100.00%
489	20nt,	63	+/100.00%
490	20nt,	25	+/100.00%
491	20nt,	15	+/100.00%
492	20nt,	13	+/100.00%
493	20nt,	11	+/100.00%
494	20nt,	10	+/100.00%
495	20nt,	10	+/100.00%
496	20nt,	10	+/100.00%
497	20nt,	23	+/100.00%
498	20nt,	69	+/100.00%
499	20nt,	12	+/100.00%
500	20nt,	36	+/100.00%
501	20nt,	10	+/100.00%
502	20nt,	45	+/100.00%
503	20nt,	13	+/100.00%
504	20nt,	74	+/100.00%
505	20nt,	14	+/100.00%
506	20nt,	24	+/100.00%
507	20nt,	34	+/100.00%
508	20nt,	67	+/100.00%
509	20nt,	101	+/100.00%
510	20nt,	10	+/100.00%
511	20nt,	68	+/100.00%
512	20nt,	12	+/100.00%
513	20nt,	42	+/100.00%
514	20nt,	11	+/100.00%
515	20nt,	21	+/100.00%
516	20nt,	13	+/100.00%
517	20nt,	104	+/100.00%
518	20nt,	25	+/100.00%
519	20nt,	31	+/100.00%
520	20nt,	12	+/100.00%
521	20nt,	25	+/100.00%
522	20nt,	17	+/100.00%
523	20nt,	11	+/100.00%
524	20nt,	12	+/100.00%
525	20nt,	15	+/100.00%
526	20nt,	14	+/100.00%
527	20nt,	12	+/100.00%
528	20nt,	12	+/100.00%
529	20nt,	10	+/100.00%
530	20nt,	22	+/100.00%
531	20nt,	44	+/100.00%
532	20nt,	16	+/100.00%
533	20nt,	24	+/100.00%
534	20nt,	27	+/100.00%
535	20nt,	14	+/100.00%
536	20nt,	75	+/100.00%
537	20nt,	14	+/100.00%
538	20nt,	71	+/100.00%
539	20nt,	10	+/100.00%
540	20nt,	13	+/100.00%
541	20nt,	11	+/100.00%
542	20nt,	19	+/100.00%
543	20nt,	52	+/100.00%
544	20nt,	24	+/100.00%
545	20nt,	20	+/100.00%
546	20nt,	39	+/100.00%
547	20nt,	16	+/100.00%
548	20nt,	59	+/100.00%
549	20nt,	26	+/100.00%
550	20nt,	12	+/100.00%
551	20nt,	23	+/100.00%
552	20nt,	53	+/100.00%
553	20nt,	13	+/100.00%
554	20nt,	61	+/100.00%
555	20nt,	21	+/100.00%
556	20nt,	19	+/100.00%
557	20nt,	14	+/100.00%
558	20nt,	76	+/100.00%
559	20nt,	19	+/100.00%
560	20nt,	21	+/100.00%
561	20nt,	15	+/100.00%
562	20nt,	73	+/100.00%
563	20nt,	26	+/100.00%
564	20nt,	26	+/100.00%
565	20nt,	73	+/100.00%
566	20nt,	11	+/100.00%
567	20nt,	11	+/100.00%
568	20nt,	69	+/100.00%
569	20nt,	14	+/100.00%
570	20nt,	38	+/100.00%
571	20nt,	34	+/100.00%
572	20nt,	16	+/100.00%
573	20nt,	12	+/100.00%
574	20nt,	12	+/100.00%
575	20nt,	106	+/100.00%
576	20nt,	11	+/100.00%
577	20nt,	80	+/100.00%
578	20nt,	11	+/100.00%
579	20nt,	19	+/100.00%
580	20nt,	49	+/100.00%
581	20nt,	85	+/100.00%
582	20nt,	23	+/100.00%
583	20nt,	19	+/100.00%
584	20nt,	16	+/100.00%
585	20nt,	16	+/100.00%
586	20nt,	49	+/100.00%
587	20nt,	62	+/100.00%
588	20nt,	25	+/100.00%
589	20nt,	22	+/100.00%
590	20nt,	10	+/100.00%
591	20nt,	64	+/100.00%
592	20nt,	33	+/100.00%
593	20nt,	13	+/100.00%
594	20nt,	12	+/100.00%
595	20nt,	11	+/100.00%
596	20nt,	47	+/100.00%
597	20nt,	20	+/100.00%
598	20nt,	15	+/100.00%
599	20nt,	11	+/100.00%
600	20nt,	13	+/100.00%
601	20nt,	53	+/100.00%
602	20nt,	23	+/100.00%
603	20nt,	17	+/100.00%
604	20nt,	14	+/100.00%
605	20nt,	28	+/100.00%
606	20nt,	48	+/100.00%
607	20nt,	19	+/100.00%
608	20nt,	14	+/100.00%
609	20nt,	11	+/100.00%
610	20nt,	11	+/100.00%
611	20nt,	52	+/100.00%
612	20nt,	17	+/100.00%
613	20nt,	35	+/100.00%
614	20nt,	18	+/100.00%
615	20nt,	12	+/100.00%
616	20nt,	95	+/100.00%
617	20nt,	48	+/100.00%
618	20nt,	17	+/100.00%
619	20nt,	10	+/100.00%
620	20nt,	14	+/100.00%
621	20nt,	10	+/100.00%
622	20nt,	13	+/100.00%
623	20nt,	43	+/100.00%
624	20nt,	35	+/100.00%
625	20nt,	13	+/100.00%
626	20nt,	11	+/100.00%
627	20nt,	38	+/100.00%
628	20nt,	10	+/100.00%
629	20nt,	33	+/100.00%
630	20nt,	30	+/100.00%
631	20nt,	12	+/100.00%
632	20nt,	30	+/100.00%
633	20nt,	21	+/100.00%
634	20nt,	24	+/100.00%
635	20nt,	106	+/100.00%
636	20nt,	11	+/100.00%
637	20nt,	10	+/100.00%
638	20nt,	192	+/100.00%
639	20nt,	11	+/100.00%
640	20nt,	10	+/100.00%
641	20nt,	56	+/100.00%
642	20nt,	27	+/100.00%
643	20nt,	52	+/100.00%
644	20nt,	14	+/100.00%
645	20nt,	11	+/100.00%
646	20nt,	35	+/100.00%
647	20nt,	35	+/100.00%
648	20nt,	11	+/100.00%
649	20nt,	10	+/100.00%
650	20nt,	103	+/100.00%
651	20nt,	17	+/100.00%
652	20nt,	26	+/100.00%
653	20nt,	28	+/100.00%
654	20nt,	18	+/100.00%
655	20nt,	32	+/100.00%
656	20nt,	14	+/100.00%
657	20nt,	73	+/100.00%
658	20nt,	10	+/100.00%
659	20nt,	14	+/100.00%
660	20nt,	16	+/100.00%
661	20nt,	12	+/100.00%
662	20nt,	23	+/100.00%
663	20nt,	11	+/100.00%
664	20nt,	28	+/100.00%
665	20nt,	10	+/100.00%
666	20nt,	38	+/100.00%
667	20nt,	22	+/100.00%
668	20nt,	16	+/100.00%
669	20nt,	11	+/100.00%
670	20nt,	31	+/100.00%
671	20nt,	14	+/100.00%
672	20nt,	11	+/100.00%
673	20nt,	10	+/100.00%
674	20nt,	11	+/100.00%
675	20nt,	50	+/100.00%
676	20nt,	22	+/100.00%
677	20nt,	18	+/100.00%
678	20nt,	16	+/100.00%
679	20nt,	13	+/100.00%
680	20nt,	13	+/100.00%
681	20nt,	12	+/100.00%
682	20nt,	11	+/100.00%
683	20nt,	10	+/100.00%
684	20nt,	159	+/100.00%
685	20nt,	17	+/100.00%
686	20nt,	96	+/100.00%
687	20nt,	10	+/100.00%
688	20nt,	51	+/100.00%
689	20nt,	27	+/100.00%
690	20nt,	33	+/100.00%
691	20nt,	11	+/100.00%
692	20nt,	11	+/100.00%
693	20nt,	11	+/100.00%
694	20nt,	18	+/100.00%
695	20nt,	33	+/100.00%
696	20nt,	12	+/100.00%
697	20nt,	10	+/100.00%
698	20nt,	24	+/100.00%
699	20nt,	14	+/100.00%
700	20nt,	12	+/100.00%
701	20nt,	73	+/100.00%
702	20nt,	11	+/100.00%
703	20nt,	19	+/100.00%
704	20nt,	11	+/100.00%
705	20nt,	10	+/100.00%
706	20nt,	14	+/100.00%
707	20nt,	109	+/100.00%
708	20nt,	50	+/100.00%
709	20nt,	33	+/100.00%
710	20nt,	10	+/100.00%
711	20nt,	10	+/100.00%
712	20nt,	16	+/100.00%
713	20nt,	56	+/100.00%
714	20nt,	60	+/100.00%
715	20nt,	44	+/100.00%
716	20nt,	45	+/100.00%
717	20nt,	17	+/100.00%
718	20nt,	19	+/100.00%
719	20nt,	15	+/100.00%
720	20nt,	13	+/100.00%
721	20nt,	36	+/100.00%
722	20nt,	29	+/100.00%
723	20nt,	15	+/100.00%
724	20nt,	12	+/100.00%
725	20nt,	70	+/100.00%
726	20nt,	34	+/100.00%
727	20nt,	65	+/100.00%
728	20nt,	25	+/100.00%
729	20nt,	10	+/100.00%
730	20nt,	15	+/100.00%
731	20nt,	20	+/100.00%
732	20nt,	11	+/100.00%
733	20nt,	10	+/100.00%
734	20nt,	14	+/100.00%
735	20nt,	74	+/100.00%
736	20nt,	63	+/100.00%
737	20nt,	106	+/100.00%
738	20nt,	15	+/100.00%
739	20nt,	91	+/100.00%
740	20nt,	57	+/100.00%
741	20nt,	14	+/100.00%
742	20nt,	83	+/100.00%
743	20nt,	33	+/100.00%
744	20nt,	13	+/100.00%
745	20nt,	11	+/100.00%
746	20nt,	44	+/100.00%
747	20nt,	11	+/100.00%
748	20nt,	18	+/100.00%
749	20nt,	12	+/100.00%
750	20nt,	10	+/100.00%
751	20nt,	31	+/100.00%
752	20nt,	16	+/100.00%
753	20nt,	11	+/100.00%
754	20nt,	36	+/100.00%
755	20nt,	15	+/100.00%
756	20nt,	15	+/100.00%
757	20nt,	18	+/100.00%
758	20nt,	71	+/100.00%
759	20nt,	19	+/100.00%
760	20nt,	73	+/100.00%
761	20nt,	20	+/100.00%
762	20nt,	15	+/100.00%
763	20nt,	23	+/100.00%
764	20nt,	11	+/100.00%
765	20nt,	49	+/100.00%
766	20nt,	57	+/100.00%
767	20nt,	76	+/100.00%
768	20nt,	28	+/100.00%
769	20nt,	10	+/100.00%
770	20nt,	13	+/100.00%
771	20nt,	202	+/100.00%
772	20nt,	12	+/100.00%
773	20nt,	10	+/100.00%
774	20nt,	18	+/100.00%
775	20nt,	11	+/100.00%
776	20nt,	21	+/100.00%
777	20nt,	14	+/100.00%
778	20nt,	12	+/100.00%
779	20nt,	12	+/100.00%
780	20nt,	11	+/100.00%
781	20nt,	10	+/100.00%
782	20nt,	13	+/100.00%
783	20nt,	11	+/100.00%
784	20nt,	11	+/100.00%
785	20nt,	11	+/100.00%
786	20nt,	10	+/100.00%
787	20nt,	10	+/100.00%
788	20nt,	10	+/100.00%
789	20nt,	15	+/100.00%
790	20nt,	12	+/100.00%
791	20nt,	11	+/100.00%
792	20nt,	10	+/100.00%
793	20nt,	20	+/100.00%
794	20nt,	17	+/100.00%
795	20nt,	12	+/100.00%
796	20nt,	11	+/100.00%
797	20nt,	10	+/100.00%
798	20nt,	22	+/100.00%
799	20nt,	19	+/100.00%
800	20nt,	13	+/100.00%
801	20nt,	10	+/100.00%
802	20nt,	23	+/100.00%
803	20nt,	10	+/100.00%
804	20nt,	12	+/100.00%
805	20nt,	15	+/100.00%
806	20nt,	15	+/100.00%
807	20nt,	22	+/100.00%
808	20nt,	18	+/100.00%
809	20nt,	16	+/100.00%
810	20nt,	12	+/100.00%
811	20nt,	11	+/100.00%
812	20nt,	11	+/100.00%
813	20nt,	13	+/100.00%
814	20nt,	18	+/100.00%
815	20nt,	21	+/100.00%
816	20nt,	27	+/100.00%
817	20nt,	33	+/100.00%
818	20nt,	36	+/100.00%
819	20nt,	40	+/100.00%
820	20nt,	48	+/100.00%
821	20nt,	65	+/100.00%
822	20nt,	66	+/100.00%
823	20nt,	81	+/100.00%
824	20nt,	81	+/100.00%
825	20nt,	86	+/100.00%
826	20nt,	108	+/100.00%
827	20nt,	133	+/100.00%
828	20nt,	268	+/100.00%
829	20nt,	71	+/100.00%
830	20nt,	25	+/100.00%
831	20nt,	24	+/100.00%
832	20nt,	22	+/100.00%
833	20nt,	22	+/100.00%
834	20nt,	18	+/100.00%
835	20nt,	17	+/100.00%
836	20nt,	12	+/100.00%
837	20nt,	11	+/100.00%
838	20nt,	10	+/100.00%
839	20nt,	17	+/100.00%
840	20nt,	15	+/100.00%
841	20nt,	46	+/100.00%
842	20nt,	12	+/100.00%
843	20nt,	26	+/100.00%
844	20nt,	12	+/100.00%
845	20nt,	18	+/100.00%
846	20nt,	10	+/100.00%
847	20nt,	11	+/100.00%
848	20nt,	14	+/100.00%
849	20nt,	18	+/100.00%
850	20nt,	37	+/100.00%
851	20nt,	32	+/100.00%
852	20nt,	18	+/100.00%
853	20nt,	10	+/100.00%
854	20nt,	18	+/100.00%
855	20nt,	11	+/100.00%
856	20nt,	10	+/100.00%
857	20nt,	15	+/100.00%
858	20nt,	10	+/100.00%
859	20nt,	13	+/100.00%
860	20nt,	10	+/100.00%
861	20nt,	20	+/100.00%
862	20nt,	12	+/100.00%
863	20nt,	16	+/100.00%
864	20nt,	11	+/100.00%
865	20nt,	11	+/100.00%
866	20nt,	14	+/100.00%
867	20nt,	15	+/100.00%
868	20nt,	16	+/100.00%
869	20nt,	21	+/100.00%
870	20nt,	31	+/100.00%
871	20nt,	35	+/100.00%
872	20nt,	37	+/100.00%
873	20nt,	41	+/100.00%
874	20nt,	57	+/100.00%
875	20nt,	61	+/100.00%
876	20nt,	146	+/100.00%
877	20nt,	12	+/100.00%
878	20nt,	12	+/100.00%
879	20nt,	14	+/100.00%
880	20nt,	14	+/100.00%
881	20nt,	22	+/100.00%
882	20nt,	26	+/100.00%
883	20nt,	28	+/100.00%
884	20nt,	29	+/100.00%
885	20nt,	30	+/100.00%
886	20nt,	31	+/100.00%
887	20nt,	32	+/100.00%
888	20nt,	33	+/100.00%
889	20nt,	35	+/100.00%
890	20nt,	36	+/100.00%
891	20nt,	38	+/100.00%
892	20nt,	45	+/100.00%
893	20nt,	47	+/100.00%
894	20nt,	52	+/100.00%
895	20nt,	52	+/100.00%
896	20nt,	68	+/100.00%
897	20nt,	19	+/100.00%
898	20nt,	11	+/100.00%
899	20nt,	11	+/100.00%
900	20nt,	11	+/100.00%
901	20nt,	10	+/100.00%
902	20nt,	10	+/100.00%
903	20nt,	12	+/100.00%
904	20nt,	13	+/100.00%
905	20nt,	18	+/100.00%
906	20nt,	26	+/100.00%
907	20nt,	28	+/100.00%
908	20nt,	36	+/100.00%
909	20nt,	38	+/100.00%
910	20nt,	55	+/100.00%
911	20nt,	60	+/100.00%
912	20nt,	73	+/100.00%
913	20nt,	105	+/100.00%
914	20nt,	143	+/100.00%
915	20nt,	67	+/100.00%
916	20nt,	60	+/100.00%
917	20nt,	47	+/100.00%
918	20nt,	47	+/100.00%
919	20nt,	43	+/100.00%
920	20nt,	41	+/100.00%
921	20nt,	37	+/100.00%
922	20nt,	30	+/100.00%
923	20nt,	29	+/100.00%
924	20nt,	22	+/100.00%
925	20nt,	20	+/100.00%
926	20nt,	13	+/100.00%
927	20nt,	13	+/100.00%
928	20nt,	13	+/100.00%
929	20nt,	11	+/100.00%
930	20nt,	11	+/100.00%
931	20nt,	11	+/100.00%
932	20nt,	18	+/100.00%
933	20nt,	10	+/100.00%
934	20nt,	11	+/100.00%
935	20nt,	10	+/100.00%
936	20nt,	12	+/100.00%
937	20nt,	16	+/100.00%
938	20nt,	18	+/100.00%
939	20nt,	19	+/100.00%
940	20nt,	24	+/100.00%
941	20nt,	28	+/100.00%
942	20nt,	33	+/100.00%
943	20nt,	35	+/100.00%
944	20nt,	24	+/100.00%
945	20nt,	22	+/100.00%
946	20nt,	21	+/100.00%
947	20nt,	21	+/100.00%
948	20nt,	17	+/100.00%
949	20nt,	17	+/100.00%
950	20nt,	16	+/100.00%
951	20nt,	14	+/100.00%
952	20nt,	14	+/100.00%
953	20nt,	14	+/100.00%
954	20nt,	14	+/100.00%
955	20nt,	13	+/100.00%
956	20nt,	13	+/100.00%
957	20nt,	12	+/100.00%
958	20nt,	11	+/100.00%
959	20nt,	11	+/100.00%
960	20nt,	11	+/100.00%
961	20nt,	10	+/100.00%
962	20nt,	10	+/100.00%
963	20nt,	13	+/100.00%
964	20nt,	10	+/100.00%
965	20nt,	15	+/100.00%
966	20nt,	23	+/100.00%
967	20nt,	15	+/100.00%
968	20nt,	11	+/100.00%
969	20nt,	11	+/100.00%
970	20nt,	10	+/100.00%
971	20nt,	10	+/100.00%
972	20nt,	23	+/100.00%
973	20nt,	16	+/100.00%
974	20nt,	16	+/100.00%
975	20nt,	10	+/100.00%
976	20nt,	14	+/100.00%
977	20nt,	30	+/100.00%
978	20nt,	592	+/100.00%
979	20nt,	295	+/100.00%
980	20nt,	287	+/100.00%
981	20nt,	168	+/100.00%
982	20nt,	153	+/100.00%
983	20nt,	145	+/100.00%
984	20nt,	93	+/100.00%
985	20nt,	85	+/100.00%
986	20nt,	59	+/100.00%
987	20nt,	55	+/100.00%
988	20nt,	52	+/100.00%
989	20nt,	37	+/100.00%
990	20nt,	37	+/100.00%
991	20nt,	34	+/100.00%
992	20nt,	32	+/100.00%
993	20nt,	26	+/100.00%
994	20nt,	13	+/100.00%
995	20nt,	18	+/100.00%
996	20nt,	29	+/100.00%
997	20nt,	11	+/100.00%
998	20nt,	13	+/100.00%
999	20nt,	10	+/100.00%
1000	20nt,	14	+/100.00%
1001	20nt,	10	+/100.00%
1002	20nt,	19	+/100.00%
1003	20nt,	11	+/100.00%
1004	20nt,	10	+/100.00%
1005	20nt,	21	+/100.00%
1006	20nt,	14	+/100.00%
1007	20nt,	13	+/100.00%
1008	20nt,	25	+/100.00%
1009	20nt,	17	+/100.00%
1010	20nt,	13	+/100.00%
1011	20nt,	10	+/100.00%
1012	20nt,	19	+/100.00%
1013	20nt,	11	+/100.00%
1014	20nt,	29	+/100.00%
1015	20nt,	18	+/100.00%
1016	20nt,	17	+/100.00%
1017	20nt,	16	+/100.00%
1018	20nt,	15	+/100.00%
1019	20nt,	13	+/100.00%
1020	20nt,	13	+/100.00%
1021	20nt,	20	+/100.00%
1022	20nt,	18	+/100.00%
1023	20nt,	16	+/100.00%
1024	20nt,	25	+/100.00%
1025	20nt,	12	+/100.00%
1026	20nt,	10	+/100.00%
1027	20nt,	11	+/100.00%
1028	20nt,	13	+/100.00%
1029	20nt,	17	+/100.00%
1030	20nt,	20	+/100.00%
1031	20nt,	22	+/100.00%
1032	20nt,	22	+/100.00%
1033	20nt,	27	+/100.00%
1034	20nt,	33	+/100.00%
1035	20nt,	38	+/100.00%
1036	20nt,	62	+/100.00%
1037	20nt,	64	+/100.00%
1038	20nt,	65	+/100.00%
1039	20nt,	69	+/100.00%
1040	20nt,	20	+/100.00%
1041	20nt,	11	+/100.00%
1042	20nt,	71	+/100.00%
1043	20nt,	129	+/100.00%
1044	20nt,	157	+/100.00%
1045	20nt,	247	+/100.00%
1046	20nt,	21	+/100.00%
1047	20nt,	10	+/100.00%
1048	20nt,	11	+/100.00%
1049	20nt,	14	+/100.00%
1050	20nt,	29	+/100.00%
1051	20nt,	10	+/100.00%
1052	20nt,	10	+/100.00%
1053	20nt,	12	+/100.00%
1054	20nt,	12	+/100.00%
1055	20nt,	17	+/100.00%
1056	20nt,	22	+/100.00%
1057	20nt,	23	+/100.00%
1058	20nt,	61	+/100.00%
1059	20nt,	16	+/100.00%
1060	20nt,	26	+/100.00%
1061	20nt,	10	+/100.00%
1062	20nt,	10	+/100.00%
1063	20nt,	10	+/100.00%
1064	20nt,	12	+/100.00%
1065	20nt,	19	+/100.00%
1066	20nt,	20	+/100.00%
1067	20nt,	31	+/100.00%
1068	20nt,	35	+/100.00%
1069	20nt,	59	+/100.00%
1070	20nt,	22	+/100.00%
1071	20nt,	18	+/100.00%
1072	20nt,	17	+/100.00%
1073	20nt,	11	+/100.00%
1074	20nt,	11	+/100.00%
1075	20nt,	10	+/100.00%
1076	20nt,	10	+/100.00%
1077	20nt,	84	+/100.00%
1078	20nt,	107	+/100.00%
1079	20nt,	147	+/100.00%
1080	20nt,	150	+/100.00%
1081	20nt,	255	+/100.00%
1082	20nt,	256	+/100.00%
1083	20nt,	300	+/100.00%
1084	20nt,	506	+/100.00%
1085	20nt,	516	+/100.00%
1086	20nt,	1007	+/100.00%
1087	20nt,	41	+/100.00%
1088	20nt,	29	+/100.00%
1089	20nt,	20	+/100.00%
1090	20nt,	13	+/100.00%
1091	20nt,	11	+/100.00%
1092	20nt,	10	+/100.00%
1093	20nt,	19	+/100.00%
1094	20nt,	17	+/100.00%
1095	20nt,	16	+/100.00%
1096	20nt,	12	+/100.00%
1097	20nt,	11	+/100.00%
1098	20nt,	10	+/100.00%
1099	20nt,	11	+/100.00%
1100	20nt,	15	+/100.00%
1101	20nt,	40	+/100.00%
1102	20nt,	14	+/100.00%
1103	20nt,	12	+/100.00%
1104	20nt,	11	+/100.00%
1105	20nt,	82	+/100.00%
1106	20nt,	75	+/100.00%
1107	20nt,	53	+/100.00%
1108	20nt,	48	+/100.00%
1109	20nt,	38	+/100.00%
1110	20nt,	33	+/100.00%
1111	20nt,	23	+/100.00%
1112	20nt,	19	+/100.00%
1113	19nt,	13	+/100.00%
1114	20nt,	20	+/100.00%
1115	20nt,	20	+/100.00%
1116	20nt,	10	+/100.00%
1117	20nt,	12	+/100.00%
1118	20nt,	10	+/100.00%
1119	20nt,	14	+/100.00%
1120	20nt,	15	+/100.00%
1121	20nt,	11	+/100.00%
1122	20nt,	10	+/100.00%
1123	20nt,	11	+/100.00%
1124	20nt,	42	+/100.00%
1125	20nt,	20	+/100.00%
1126	20nt,	11	+/100.00%
1127	20nt,	10	+/100.00%
1128	20nt,	16	+/100.00%
1129	20nt,	17	+/100.00%
1130	20nt,	14	+/100.00%
1131	20nt,	12	+/100.00%
1132	20nt,	10	+/100.00%
1133	20nt,	10	+/100.00%
1134	20nt,	12	+/100.00%
1135	20nt,	12	+/100.00%
1136	20nt,	11	+/100.00%
1137	20nt,	116	+/100.00%
1138	20nt,	13	+/100.00%
1139	20nt,	11	+/100.00%
1140	20nt,	120	+/100.00%
1141	20nt,	16	+/100.00%
1142	20nt,	15	+/100.00%
1143	20nt,	441	+/100.00%
1144	20nt,	49	+/100.00%
1145	20nt,	19	+/100.00%
1146	20nt,	10	+/100.00%
1147	20nt,	12	+/100.00%
1148	20nt,	10	+/100.00%
1149	20nt,	58	+/100.00%
1150	20nt,	25	+/100.00%
1151	20nt,	20	+/100.00%
1152	20nt,	20	+/100.00%
1153	20nt,	18	+/100.00%
1154	20nt,	18	+/100.00%
1155	20nt,	13	+/100.00%
1156	20nt,	13	+/100.00%
1157	20nt,	12	+/100.00%
1158	20nt,	10	+/100.00%
1159	20nt,	10	+/100.00%
1160	20nt,	11	+/100.00%
1161	20nt,	11	+/100.00%
1162	20nt,	10	+/100.00%
1163	20nt,	10	+/100.00%
1164	20nt,	11	+/100.00%
1165	20nt,	11	+/100.00%
1166	20nt,	16	+/100.00%
1167	20nt,	14	+/100.00%
1168	20nt,	35	+/100.00%
1169	20nt,	44	+/100.00%
1170	20nt,	35	+/100.00%
1171	20nt,	31	+/100.00%
1172	20nt,	31	+/100.00%
1173	20nt,	26	+/100.00%
1174	20nt,	20	+/100.00%
1175	20nt,	17	+/100.00%
1176	20nt,	13	+/100.00%
1177	20nt,	13	+/100.00%
1178	20nt,	13	+/100.00%
1179	20nt,	12	+/100.00%
1180	20nt,	11	+/100.00%
1181	20nt,	10	+/100.00%
1182	20nt,	14	+/100.00%
1183	20nt,	35	+/100.00%
1184	20nt,	18	+/100.00%
1185	20nt,	17	+/100.00%
1186	20nt,	16	+/100.00%
1187	20nt,	14	+/100.00%
1188	20nt,	17	+/100.00%
1189	20nt,	17	+/100.00%
1190	20nt,	24	+/100.00%
1191	20nt,	38	+/100.00%
1192	20nt,	43	+/100.00%
1193	20nt,	42	+/100.00%
1194	20nt,	40	+/100.00%
1195	20nt,	16	+/100.00%
1196	20nt,	14	+/100.00%
1197	20nt,	10	+/100.00%
1198	20nt,	18	+/100.00%
1199	20nt,	19	+/100.00%
1200	20nt,	38	+/100.00%
1201	20nt,	22	+/100.00%
1202	20nt,	21	+/100.00%
1203	20nt,	18	+/100.00%
1204	20nt,	17	+/100.00%
1205	20nt,	15	+/100.00%
1206	20nt,	11	+/100.00%
1207	20nt,	10	+/100.00%
1208	20nt,	10	+/100.00%
1209	20nt,	15	+/100.00%
1210	20nt,	11	+/100.00%
1211	20nt,	10	+/100.00%
1212	20nt,	15	+/100.00%
1213	20nt,	14	+/100.00%
1214	20nt,	11	+/100.00%
1215	20nt,	13	+/100.00%
1216	20nt,	15	+/100.00%
1217	20nt,	28	+/100.00%
1218	20nt,	24	+/100.00%
1219	20nt,	21	+/100.00%
1220	20nt,	13	+/100.00%
1221	20nt,	13	+/100.00%
1222	20nt,	11	+/100.00%
1223	20nt,	12	+/100.00%
1224	20nt,	15	+/100.00%
1225	20nt,	19	+/100.00%
1226	20nt,	25	+/100.00%
1227	20nt,	25	+/100.00%
1228	20nt,	34	+/100.00%
1229	20nt,	80	+/100.00%
1230	20nt,	49	+/100.00%
1231	20nt,	40	+/100.00%
1232	20nt,	28	+/100.00%
1233	20nt,	21	+/100.00%
1234	20nt,	15	+/100.00%
1235	20nt,	14	+/100.00%
1236	20nt,	11	+/100.00%
1237	20nt,	11	+/100.00%
1238	20nt,	11	+/100.00%
1239	20nt,	17	+/100.00%
1240	20nt,	32	+/100.00%
1241	20nt,	29	+/100.00%
1242	20nt,	25	+/100.00%
1243	20nt,	19	+/100.00%
1244	20nt,	15	+/100.00%
1245	20nt,	14	+/100.00%
1246	20nt,	12	+/100.00%
1247	20nt,	10	+/100.00%
1248	20nt,	13	+/100.00%
1249	20nt,	17	+/100.00%
1250	20nt,	18	+/100.00%
1251	20nt,	22	+/100.00%
1252	20nt,	24	+/100.00%
1253	20nt,	65	+/100.00%
1254	20nt,	40	+/100.00%
1255	20nt,	35	+/100.00%
1256	20nt,	35	+/100.00%
1257	20nt,	29	+/100.00%
1258	20nt,	24	+/100.00%
1259	20nt,	20	+/100.00%
1260	20nt,	19	+/100.00%
1261	20nt,	15	+/100.00%
1262	20nt,	13	+/100.00%
1263	20nt,	13	+/100.00%
1264	20nt,	12	+/100.00%
1265	20nt,	10	+/100.00%
1266	20nt,	11	+/100.00%
1267	20nt,	19	+/100.00%
1268	20nt,	18	+/100.00%
1269	20nt,	13	+/100.00%
1270	20nt,	12	+/100.00%
1271	20nt,	10	+/100.00%
1272	20nt,	11	+/100.00%
1273	20nt,	12	+/100.00%
1274	20nt,	14	+/100.00%
1275	20nt,	16	+/100.00%
1276	20nt,	29	+/100.00%
1277	20nt,	19	+/100.00%
1278	20nt,	18	+/100.00%
1279	20nt,	11	+/100.00%
1280	20nt,	10	+/100.00%
1281	20nt,	10	+/100.00%
1282	20nt,	11	+/100.00%
1283	20nt,	16	+/100.00%
1284	20nt,	17	+/100.00%
1285	20nt,	14	+/100.00%
1286	20nt,	13	+/100.00%
1287	20nt,	11	+/100.00%
1288	20nt,	11	+/100.00%
1289	20nt,	11	+/100.00%
1290	20nt,	10	+/100.00%
1291	20nt,	16	+/100.00%
1292	20nt,	15	+/100.00%
1293	20nt,	119	+/100.00%
1294	20nt,	135	+/100.00%
1295	20nt,	84	+/100.00%
1296	20nt,	76	+/100.00%
1297	20nt,	63	+/100.00%
1298	20nt,	54	+/100.00%
1299	20nt,	50	+/100.00%
1300	20nt,	46	+/100.00%
1301	20nt,	36	+/100.00%
1302	20nt,	32	+/100.00%
1303	20nt,	32	+/100.00%
1304	20nt,	27	+/100.00%
1305	20nt,	27	+/100.00%
1306	20nt,	25	+/100.00%
1307	20nt,	24	+/100.00%
1308	20nt,	19	+/100.00%
1309	20nt,	18	+/100.00%
1310	20nt,	18	+/100.00%
1311	20nt,	17	+/100.00%
1312	20nt,	16	+/100.00%
1313	20nt,	16	+/100.00%
1314	20nt,	15	+/100.00%
1315	20nt,	15	+/100.00%
1316	20nt,	14	+/100.00%
1317	20nt,	13	+/100.00%
1318	20nt,	13	+/100.00%
1319	20nt,	13	+/100.00%
1320	20nt,	11	+/100.00%
1321	20nt,	11	+/100.00%
1322	20nt,	10	+/100.00%
1323	20nt,	10	+/100.00%
1324	20nt,	10	+/100.00%
1325	20nt,	16	+/100.00%
1326	20nt,	10	+/100.00%
1327	20nt,	10	+/100.00%
1328	20nt,	70	+/100.00%
1329	20nt,	70	+/100.00%
1330	20nt,	57	+/100.00%
1331	20nt,	50	+/100.00%
1332	20nt,	48	+/100.00%
1333	20nt,	40	+/100.00%
1334	20nt,	26	+/100.00%
1335	20nt,	19	+/100.00%
1336	20nt,	16	+/100.00%
1337	20nt,	14	+/100.00%
1338	20nt,	13	+/100.00%
1339	20nt,	16	+/100.00%
1340	20nt,	18	+/100.00%
1341	20nt,	12	+/100.00%
1342	20nt,	13	+/100.00%
1343	20nt,	16	+/100.00%
1344	20nt,	17	+/100.00%
1345	20nt,	18	+/100.00%
1346	20nt,	21	+/100.00%
1347	20nt,	23	+/100.00%
1348	20nt,	28	+/100.00%
1349	20nt,	41	+/100.00%
1350	20nt,	62	+/100.00%
1351	20nt,	61	+/100.00%
1352	20nt,	38	+/100.00%
1353	20nt,	27	+/100.00%
1354	20nt,	20	+/100.00%
1355	20nt,	16	+/100.00%
1356	20nt,	16	+/100.00%
1357	20nt,	11	+/100.00%
1358	20nt,	11	+/100.00%
1359	20nt,	10	+/100.00%
1360	20nt,	11	+/100.00%
1361	20nt,	19	+/100.00%
1362	20nt,	19	+/100.00%
1363	20nt,	16	+/100.00%
1364	20nt,	12	+/100.00%
1365	20nt,	11	+/100.00%
1366	20nt,	12	+/100.00%
1367	20nt,	11	+/100.00%
1368	20nt,	13	+/100.00%
1369	20nt,	10	+/100.00%
1370	20nt,	10	+/100.00%
1371	20nt,	13	+/100.00%
1372	20nt,	19	+/100.00%
1373	20nt,	28	+/100.00%
1374	20nt,	21	+/100.00%
1375	20nt,	13	+/100.00%
1376	20nt,	13	+/100.00%
1377	20nt,	45	+/100.00%
1378	20nt,	29	+/100.00%
1379	20nt,	24	+/100.00%
1380	20nt,	14	+/100.00%
1381	20nt,	10	+/100.00%
1382	20nt,	34	+/100.00%
1383	20nt,	11	+/100.00%
1384	20nt,	15	+/100.00%
1385	20nt,	16	+/100.00%
1386	20nt,	21	+/100.00%
1387	20nt,	26	+/100.00%
1388	20nt,	10	+/100.00%
1389	20nt,	10	+/100.00%
1390	20nt,	12	+/100.00%
1391	20nt,	17	+/100.00%
1392	20nt,	22	+/100.00%
1393	20nt,	25	+/100.00%
1394	20nt,	29	+/100.00%
1395	20nt,	40	+/100.00%
1396	20nt,	55	+/100.00%
1397	20nt,	82	+/100.00%
1398	20nt,	20	+/100.00%
1399	20nt,	11	+/100.00%
1400	20nt,	10	+/100.00%
1401	20nt,	12	+/100.00%
1402	20nt,	20	+/100.00%
1403	20nt,	97	+/100.00%
1404	20nt,	55	+/100.00%
1405	20nt,	34	+/100.00%
1406	20nt,	27	+/100.00%
1407	20nt,	26	+/100.00%
1408	20nt,	20	+/100.00%
1409	20nt,	16	+/100.00%
1410	20nt,	13	+/100.00%
1411	20nt,	11	+/100.00%
1412	20nt,	10	+/100.00%
1413	20nt,	86	+/100.00%
1414	20nt,	16	+/100.00%
1415	20nt,	40	+/100.00%
1416	20nt,	20	+/100.00%
1417	20nt,	14	+/100.00%
1418	20nt,	13	+/100.00%
1419	20nt,	74	+/100.00%
1420	20nt,	33	+/100.00%
1421	20nt,	15	+/100.00%
1422	20nt,	10	+/100.00%
1423	20nt,	17	+/100.00%
1424	20nt,	12	+/100.00%
1425	20nt,	10	+/100.00%
1426	20nt,	17	+/100.00%
1427	20nt,	20	+/100.00%
1428	20nt,	46	+/100.00%
1429	20nt,	44	+/100.00%
1430	20nt,	37	+/100.00%
1431	20nt,	25	+/100.00%
1432	20nt,	23	+/100.00%
1433	20nt,	21	+/100.00%
1434	20nt,	15	+/100.00%
1435	20nt,	12	+/100.00%
1436	20nt,	12	+/100.00%
1437	20nt,	11	+/100.00%
1438	20nt,	11	+/100.00%
1439	20nt,	15	+/100.00%
1440	20nt,	50	+/100.00%
1441	20nt,	27	+/100.00%
1442	20nt,	22	+/100.00%
1443	20nt,	16	+/100.00%
1444	20nt,	14	+/100.00%
1445	20nt,	11	+/100.00%
1446	20nt,	110	+/100.00%
1447	20nt,	24	+/100.00%
1448	20nt,	13	+/100.00%
1449	20nt,	17	+/100.00%
1450	20nt,	155	+/100.00%
1451	20nt,	10	+/100.00%
1452	20nt,	21	+/100.00%
1453	20nt,	155	+/100.00%
1454	20nt,	12	+/100.00%
Cluster	4			39	0.0261968
0	20nt,	29
1	20nt,	10	+/100.00%
Cluster	5			36	0.0241817
0	20nt,	26
1	20nt,	10	+/100.00%
Cluster	6			22	0.0147777
0	20nt,	22
Cluster	7			48	0.0322422
0	20nt,	31
1	20nt,	17	+/100.00%
Cluster	8			1379	0.926293
0	20nt,	14
1	20nt,	11	+/100.00%
2	20nt,	11	+/100.00%
3	20nt,	10	+/100.00%
4	20nt,	10	+/100.00%
5	20nt,	10	+/100.00%
6	20nt,	11	+/100.00%
7	20nt,	12	+/100.00%
8	20nt,	16	+/100.00%
9	20nt,	33	+/100.00%
10	20nt,	22	+/100.00%
11	20nt,	22	+/100.00%
12	20nt,	15	+/100.00%
13	20nt,	15	+/100.00%
14	20nt,	15	+/100.00%
15	20nt,	14	+/100.00%
16	20nt,	11	+/100.00%
17	20nt,	10	+/100.00%
18	20nt,	10	+/100.00%
19	20nt,	15	+/100.00%
20	20nt,	15	+/100.00%
21	20nt,	13	+/100.00%
22	20nt,	13	+/100.00%
23	20nt,	57	+/100.00%
24	20nt,	41	+/100.00%
25	20nt,	23	+/100.00%
26	20nt,	23	+/100.00%
27	20nt,	20	+/100.00%
28	20nt,	17	+/100.00%
29	20nt,	16	+/100.00%
30	20nt,	15	+/100.00%
31	20nt,	14	+/100.00%
32	20nt,	12	+/100.00%
33	20nt,	11	+/100.00%
34	20nt,	139	+/100.00%
35	20nt,	30	+/100.00%
36	20nt,	14	+/100.00%
37	20nt,	12	+/100.00%
38	20nt,	14	+/100.00%
39	20nt,	56	+/100.00%
40	20nt,	24	+/100.00%
41	20nt,	21	+/100.00%
42	20nt,	12	+/100.00%
43	20nt,	12	+/100.00%
44	20nt,	12	+/100.00%
45	20nt,	10	+/100.00%
46	20nt,	18	+/100.00%
47	20nt,	11	+/100.00%
48	20nt,	244	+/100.00%
49	20nt,	40	+/100.00%
50	20nt,	11	+/100.00%
51	20nt,	60	+/100.00%
52	20nt,	27	+/100.00%
53	20nt,	23	+/100.00%
54	20nt,	12	+/100.00%
Cluster	9			31	0.0208231
0	20nt,	21
1	20nt,	10	+/100.00%
Cluster	10			15	0.0100757
0	20nt,	15
Cluster	11			22	0.0147777
0	20nt,	22
Cluster	12			56	0.037616
0	20nt,	40
1	20nt,	16	+/100.00%
Cluster	13			17	0.0114191
0	20nt,	17
Cluster	14			12	0.00806056
0	20nt,	12
Cluster	15			10	0.00671713
0	20nt,	10
Cluster	16			39	0.0261968
0	20nt,	12
1	20nt,	15	+/100.00%
2	20nt,	12	+/100.00%
Cluster	17			27	0.0181363
0	20nt,	14
1	20nt,	13	+/100.00%
Cluster	18			795	0.534012
0	20nt,	48
1	20nt,	21	+/100.00%
2	20nt,	19	+/100.00%
3	20nt,	275	+/100.00%
4	20nt,	30	+/100.00%
5	20nt,	11	+/100.00%
6	20nt,	11	+/100.00%
7	20nt,	81	+/100.00%
8	20nt,	39	+/100.00%
9	20nt,	12	+/100.00%
10	20nt,	11	+/100.00%
11	20nt,	10	+/100.00%
12	20nt,	95	+/100.00%
13	20nt,	13	+/100.00%
14	20nt,	11	+/100.00%
15	20nt,	17	+/100.00%
16	20nt,	28	+/100.00%
17	20nt,	14	+/100.00%
18	20nt,	13	+/100.00%
19	20nt,	12	+/100.00%
20	20nt,	10	+/100.00%
21	20nt,	14	+/100.00%
Cluster	19			25	0.0167928
0	20nt,	25
Cluster	20			43	0.0288837
0	20nt,	32
1	20nt,	11	+/100.00%
Cluster	21			46	0.0308988
0	20nt,	17
1	20nt,	29	+/100.00%
Cluster	22			79	0.0530654
0	20nt,	14
1	20nt,	12	+/100.00%
2	20nt,	53	+/100.00%
Cluster	23			60	0.0403028
0	20nt,	11
1	20nt,	10	+/100.00%
2	20nt,	39	+/100.00%
Cluster	24			121	0.0812773
0	20nt,	22
1	20nt,	12	+/100.00%
2	20nt,	10	+/100.00%
3	20nt,	77	+/100.00%
Cluster	25			173	0.116206
0	20nt,	29
1	20nt,	12	+/100.00%
2	20nt,	12	+/100.00%
3	20nt,	89	+/100.00%
4	20nt,	16	+/100.00%
5	20nt,	15	+/100.00%
Cluster	26			38	0.0255251
0	20nt,	38
Cluster	27			64	0.0429897
0	20nt,	26
1	20nt,	38	+/100.00%
Cluster	28			150	0.100757
0	20nt,	26
1	20nt,	23	+/100.00%
2	20nt,	10	+/100.00%
3	20nt,	91	+/100.00%
Cluster	29			131	0.0879945
0	20nt,	26
1	20nt,	11	+/100.00%
2	20nt,	11	+/100.00%
3	20nt,	72	+/100.00%
4	20nt,	11	+/100.00%
Cluster	30			127	0.0853076
0	20nt,	19
1	20nt,	83	+/100.00%
2	20nt,	13	+/100.00%
3	20nt,	12	+/100.00%
Cluster	31			430	0.288837
0	20nt,	47
1	20nt,	13	+/100.00%
2	20nt,	10	+/100.00%
3	20nt,	165	+/100.00%
4	20nt,	26	+/100.00%
5	20nt,	10	+/100.00%
6	20nt,	13	+/100.00%
7	20nt,	11	+/100.00%
8	20nt,	16	+/100.00%
9	20nt,	10	+/100.00%
10	20nt,	11	+/100.00%
11	20nt,	34	+/100.00%
12	20nt,	12	+/100.00%
13	20nt,	25	+/100.00%
14	20nt,	11	+/100.00%
15	20nt,	16	+/100.00%
Cluster	32			17	0.0114191
0	20nt,	17
Cluster	33			182	0.122252
0	20nt,	20
1	20nt,	19	+/100.00%
2	20nt,	10	+/100.00%
3	20nt,	14	+/100.00%
4	20nt,	35	+/100.00%
5	20nt,	22	+/100.00%
6	20nt,	52	+/100.00%
7	20nt,	10	+/100.00%
Cluster	34			46	0.0308988
0	20nt,	13
1	20nt,	33	+/100.00%
Cluster	35			10	0.00671713
0	20nt,	10
Cluster	36			949	0.637456
0	20nt,	10
1	20nt,	12	+/100.00%
2	20nt,	24	+/100.00%
3	20nt,	14	+/100.00%
4	20nt,	27	+/100.00%
5	20nt,	237	+/100.00%
6	20nt,	10	+/100.00%
7	20nt,	11	+/100.00%
8	20nt,	10	+/100.00%
9	20nt,	10	+/100.00%
10	20nt,	13	+/100.00%
11	20nt,	323	+/100.00%
12	20nt,	24	+/100.00%
13	20nt,	14	+/100.00%
14	20nt,	99	+/100.00%
15	20nt,	41	+/100.00%
16	20nt,	32	+/100.00%
17	20nt,	12	+/100.00%
18	20nt,	15	+/100.00%
19	20nt,	11	+/100.00%
Cluster	37			223	0.149792
0	20nt,	22
1	20nt,	10	+/100.00%
2	20nt,	23	+/100.00%
3	20nt,	15	+/100.00%
4	20nt,	79	+/100.00%
5	20nt,	12	+/100.00%
6	20nt,	31	+/100.00%
7	20nt,	17	+/100.00%
8	20nt,	14	+/100.00%
Cluster	38			2485	1.66921
0	20nt,	20
1	20nt,	15	+/100.00%
2	20nt,	12	+/100.00%
3	20nt,	14	+/100.00%
4	20nt,	10	+/100.00%
5	20nt,	10	+/100.00%
6	20nt,	12	+/100.00%
7	20nt,	30	+/100.00%
8	20nt,	25	+/100.00%
9	20nt,	13	+/100.00%
10	20nt,	11	+/100.00%
11	20nt,	23	+/100.00%
12	20nt,	29	+/100.00%
13	20nt,	12	+/100.00%
14	20nt,	14	+/100.00%
15	20nt,	56	+/100.00%
16	20nt,	11	+/100.00%
17	20nt,	11	+/100.00%
18	20nt,	10	+/100.00%
19	20nt,	12	+/100.00%
20	20nt,	10	+/100.00%
21	20nt,	228	+/100.00%
22	20nt,	12	+/100.00%
23	20nt,	10	+/100.00%
24	20nt,	12	+/100.00%
25	20nt,	19	+/100.00%
26	20nt,	11	+/100.00%
27	20nt,	12	+/100.00%
28	20nt,	19	+/100.00%
29	20nt,	12	+/100.00%
30	20nt,	12	+/100.00%
31	20nt,	10	+/100.00%
32	20nt,	14	+/100.00%
33	20nt,	12	+/100.00%
34	20nt,	10	+/100.00%
35	20nt,	10	+/100.00%
36	20nt,	11	+/100.00%
37	20nt,	12	+/100.00%
38	20nt,	12	+/100.00%
39	20nt,	13	+/100.00%
40	20nt,	452	+/100.00%
41	20nt,	34	+/100.00%
42	20nt,	26	+/100.00%
43	20nt,	10	+/100.00%
44	20nt,	17	+/100.00%
45	20nt,	31	+/100.00%
46	20nt,	66	+/100.00%
47	20nt,	125	+/100.00%
48	20nt,	12	+/100.00%
49	20nt,	15	+/100.00%
50	20nt,	20	+/100.00%
51	20nt,	21	+/100.00%
52	20nt,	22	+/100.00%
53	20nt,	29	+/100.00%
54	20nt,	37	+/100.00%
55	20nt,	45	+/100.00%
56	20nt,	55	+/100.00%
57	20nt,	79	+/100.00%
58	20nt,	114	+/100.00%
59	20nt,	31	+/100.00%
60	20nt,	20	+/100.00%
61	20nt,	15	+/100.00%
62	20nt,	15	+/100.00%
63	20nt,	12	+/100.00%
64	20nt,	11	+/100.00%
65	20nt,	13	+/100.00%
66	20nt,	16	+/100.00%
67	20nt,	21	+/100.00%
68	20nt,	22	+/100.00%
69	20nt,	25	+/100.00%
70	20nt,	36	+/100.00%
71	20nt,	81	+/100.00%
72	20nt,	35	+/100.00%
73	20nt,	20	+/100.00%
74	20nt,	11	+/100.00%
75	20nt,	21	+/100.00%
76	20nt,	16	+/100.00%
77	20nt,	20	+/100.00%
78	20nt,	12	+/100.00%
79	20nt,	11	+/100.00%
Cluster	39			10	0.00671713
0	20nt,	10
Cluster	40			287	0.192782
0	19nt,	17
1	19nt,	42	+/100.00%
2	19nt,	30	+/100.00%
3	19nt,	11	+/100.00%
4	19nt,	23	+/100.00%
5	19nt,	15	+/100.00%
6	19nt,	28	+/100.00%
7	19nt,	14	+/100.00%
8	19nt,	11	+/100.00%
9	19nt,	74	+/100.00%
10	19nt,	12	+/100.00%
11	19nt,	10	+/100.00%
Cluster	41			70	0.0470199
0	19nt,	15
1	19nt,	10	+/100.00%
2	19nt,	12	+/100.00%
3	19nt,	13	+/100.00%
4	19nt,	10	+/100.00%
5	19nt,	10	+/100.00%
Cluster	42			47738	32.0663
0	19nt,	13
1	19nt,	11	+/100.00%
2	19nt,	13	+/100.00%
3	19nt,	20	+/100.00%
4	19nt,	13	+/100.00%
5	19nt,	14	+/100.00%
6	19nt,	11	+/100.00%
7	19nt,	16	+/100.00%
8	19nt,	11	+/100.00%
9	19nt,	12	+/100.00%
10	19nt,	16	+/100.00%
11	19nt,	10	+/100.00%
12	19nt,	10	+/100.00%
13	19nt,	21	+/100.00%
14	19nt,	12	+/100.00%
15	19nt,	11	+/100.00%
16	19nt,	44	+/100.00%
17	19nt,	15	+/100.00%
18	19nt,	11	+/100.00%
19	19nt,	27	+/100.00%
20	19nt,	28	+/100.00%
21	19nt,	12	+/100.00%
22	19nt,	10	+/100.00%
23	19nt,	14	+/100.00%
24	19nt,	43	+/100.00%
25	19nt,	24	+/100.00%
26	19nt,	14	+/100.00%
27	19nt,	16	+/100.00%
28	19nt,	11	+/100.00%
29	19nt,	27	+/100.00%
30	19nt,	10	+/100.00%
31	19nt,	12	+/100.00%
32	19nt,	20	+/100.00%
33	19nt,	16	+/100.00%
34	19nt,	67	+/100.00%
35	19nt,	17	+/100.00%
36	19nt,	73	+/100.00%
37	19nt,	10	+/100.00%
38	19nt,	10	+/100.00%
39	19nt,	33	+/100.00%
40	19nt,	24	+/100.00%
41	19nt,	21	+/100.00%
42	19nt,	17	+/100.00%
43	19nt,	16	+/100.00%
44	19nt,	15	+/100.00%
45	19nt,	10	+/100.00%
46	19nt,	16	+/100.00%
47	19nt,	11	+/100.00%
48	19nt,	27	+/100.00%
49	19nt,	21	+/100.00%
50	19nt,	13	+/100.00%
51	19nt,	12	+/100.00%
52	19nt,	33	+/100.00%
53	19nt,	10	+/100.00%
54	19nt,	49	+/100.00%
55	19nt,	14	+/100.00%
56	19nt,	10	+/100.00%
57	19nt,	10	+/100.00%
58	19nt,	11	+/100.00%
59	19nt,	11	+/100.00%
60	19nt,	14	+/100.00%
61	19nt,	20	+/100.00%
62	19nt,	15	+/100.00%
63	19nt,	13	+/100.00%
64	19nt,	11	+/100.00%
65	19nt,	10	+/100.00%
66	19nt,	153	+/100.00%
67	19nt,	13	+/100.00%
68	19nt,	43	+/100.00%
69	19nt,	17	+/100.00%
70	19nt,	11	+/100.00%
71	19nt,	15	+/100.00%
72	19nt,	59	+/100.00%
73	19nt,	112	+/100.00%
74	19nt,	17	+/100.00%
75	19nt,	16	+/100.00%
76	19nt,	10	+/100.00%
77	19nt,	55	+/100.00%
78	19nt,	50	+/100.00%
79	19nt,	46	+/100.00%
80	19nt,	39	+/100.00%
81	19nt,	38	+/100.00%
82	19nt,	32	+/100.00%
83	19nt,	28	+/100.00%
84	19nt,	15	+/100.00%
85	19nt,	15	+/100.00%
86	19nt,	13	+/100.00%
87	19nt,	12	+/100.00%
88	19nt,	12	+/100.00%
89	19nt,	10	+/100.00%
90	19nt,	13	+/100.00%
91	19nt,	16	+/100.00%
92	19nt,	10	+/100.00%
93	19nt,	12	+/100.00%
94	19nt,	13	+/100.00%
95	19nt,	14	+/100.00%
96	19nt,	14	+/100.00%
97	19nt,	15	+/100.00%
98	19nt,	16	+/100.00%
99	19nt,	20	+/100.00%
100	19nt,	23	+/100.00%
101	19nt,	58	+/100.00%
102	19nt,	67	+/100.00%
103	19nt,	76	+/100.00%
104	19nt,	116	+/100.00%
105	19nt,	2922	+/100.00%
106	19nt,	362	+/100.00%
107	19nt,	123	+/100.00%
108	19nt,	33	+/100.00%
109	19nt,	11	+/100.00%
110	19nt,	13	+/100.00%
111	19nt,	15	+/100.00%
112	19nt,	23	+/100.00%
113	19nt,	789	+/100.00%
114	19nt,	21	+/100.00%
115	19nt,	14	+/100.00%
116	19nt,	12	+/100.00%
117	19nt,	12	+/100.00%
118	19nt,	10	+/100.00%
119	19nt,	10	+/100.00%
120	19nt,	14	+/100.00%
121	19nt,	16	+/100.00%
122	19nt,	18	+/100.00%
123	19nt,	22	+/100.00%
124	19nt,	69	+/100.00%
125	19nt,	40	+/100.00%
126	19nt,	12	+/100.00%
127	19nt,	14	+/100.00%
128	19nt,	25	+/100.00%
129	19nt,	71	+/100.00%
130	19nt,	10	+/100.00%
131	19nt,	27	+/100.00%
132	19nt,	93	+/100.00%
133	19nt,	211	+/100.00%
134	19nt,	255	+/100.00%
135	19nt,	439	+/100.00%
136	19nt,	16	+/100.00%
137	19nt,	15	+/100.00%
138	19nt,	12	+/100.00%
139	19nt,	10	+/100.00%
140	19nt,	13	+/100.00%
141	19nt,	50	+/100.00%
142	19nt,	21	+/100.00%
143	19nt,	10	+/100.00%
144	19nt,	14	+/100.00%
145	19nt,	11	+/100.00%
146	19nt,	15	+/100.00%
147	19nt,	31	+/100.00%
148	19nt,	12	+/100.00%
149	19nt,	30	+/100.00%
150	19nt,	15	+/100.00%
151	19nt,	38	+/100.00%
152	19nt,	26	+/100.00%
153	19nt,	22	+/100.00%
154	19nt,	13	+/100.00%
155	19nt,	10	+/100.00%
156	19nt,	52	+/100.00%
157	19nt,	12	+/100.00%
158	19nt,	15	+/100.00%
159	19nt,	11	+/100.00%
160	19nt,	18	+/100.00%
161	19nt,	17	+/100.00%
162	19nt,	21	+/100.00%
163	19nt,	30	+/100.00%
164	19nt,	10	+/100.00%
165	19nt,	15	+/100.00%
166	19nt,	19	+/100.00%
167	19nt,	14	+/100.00%
168	19nt,	23	+/100.00%
169	19nt,	19	+/100.00%
170	19nt,	39	+/100.00%
171	19nt,	11	+/100.00%
172	19nt,	19	+/100.00%
[truncated: 2,007 more rows]

[truncated: 13 more sheets: R18, R21, R24, R27, R28, R31, R34, R36, R38, R43, R46, R49, R52]
